# Supplementary material for: Aryne generation vs. Truce-Smiles and fries rearrangements during the Kobayashi fragmentation reaction: a new bi-aryl synthesis
Source: Royal Society of Chemistry journal article supplement (doi:10.1039/c5ob01239b), 2015-01-01
Supplement: c5ob01239b1.pdf [file c5ob01239b1.pdf]

## **Aryne Generation vs Truce-Smiles and Fries Rearrangements during the Kobayashi Fragmentation Reaction: A New Bi-Aryl Synthesis**

Omer K. Rasheed, Ian R. Hardcastle, James Raftery and Peter Quayle\*

Corresponding author: [peter.quayle@manchester.ac.uk](mailto:peter.quayle@manchester.ac.uk)

**NOTE OF CAUTION:** Many of the compounds prepared and utilised in this study are poly-nitroaromatics. While we have not tested the thermal/shock stability of these compounds we do suggest that every precaution be taken in their handling in order to avoid detonation.

---

All reactions were conducted in dry glassware under a nitrogen atmosphere, unless otherwise stated. All chemicals were purchased from a chemical supplier and used as received unless otherwise stated. THF was distilled from sodium wire and acetonitrile and DCM were redistilled from calcium hydride; methanol was dried over molecular sieves (4 Å). *n*-BuLi was purchased as a 1.6M solution in hexane from Aldrich Chemicals. PhLi was purchased as 1.8M solution in dibutylether from Aldrich Chemicals. Tetrabutylammonium fluoride was purchased as 1M solution in THF from Aldrich chemicals. Sodium hydride was purchased as 80% dispersion in mineral oil from Aldrich chemicals. <sup>1</sup>H NMR spectra were recorded at 300, 400 or 500 MHz and <sup>13</sup>C NMR spectra at 75, 100 or 125 MHz on a Bruker AC300, AC400 or AC500 spectrometer. The splitting patterns for NMR spectra are designated as follows: s (singlet), br.s (broad singlet), d (doublet), t (triplet), q (quadruplet), m (multiplet), or combinations thereof. Assignments were made with the aid of DEPT135, COSY, HMBC and HMQC experiments. Mass spectra were recorded on one of the following: Waters QTOF (ES, HRMS), Thermo Finnigan MAT95XP (GC/MS, EI, and HRMS) or a Hewlett Packard 5971 MSD (GC/MS). Infrared spectra were recorded on a Bruker Alpha FT-IR. A Sanyo Gallenkamp melting point apparatus was used for melting points. Chromatographic purifications were performed using silica gel SDS (particle size 0.04-0.06 mm).

#### i. Attempted generation and trapping of benzyne (9).

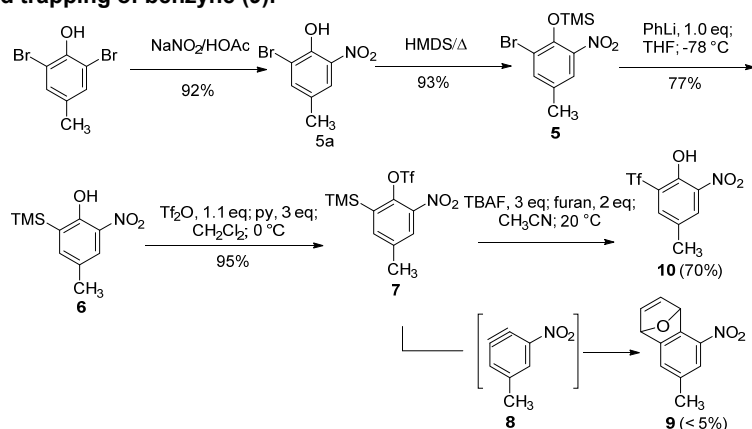

#### Synthesis of 2-bromo-4-methyl-6-nitrophenol (5a):<sup>1</sup>

To the stirred mixture of 2,6-dibromo-4-methylphenol (30.8 g, 0.12 mol) in glacial acetic acid (300 mL), sodium nitrite (88 g, 0.13 mol) was added. The reaction mixture was stirred overnight at rt. The mixture was poured into water (1.5 L). The product was precipitated out which was then filtered. The *title compound* was obtained as deep yellow solid (26.81 g, 93%, mp 66-68 °C, Lit<sup>1</sup> 67-69 °C). <sup>1</sup>H NMR (500 MHz, CDCl<sub>3</sub>) δ ppm 2.33 (3H, s, CH<sub>3</sub>) 7.67 (1H, d, *J* = 1.5 Hz, Ar-H<sub>3</sub>) 7.86 (1H, d, *J* = 1 Hz, Ar-H<sub>5</sub>) 10.90 (1H, br. s., OH). <sup>13</sup>C NMR (125 MHz, CDCl<sub>3</sub>) δ ppm 20.0 (CH<sub>3</sub>), 112.6, 123.9 (C<sub>5</sub>), 130.5, 137.5, 141.6 (C<sub>3</sub>), 149.9. MS (ES-): [M]<sup>-</sup> 230. **Accurate Mass** (ES-): [C<sub>7</sub>H<sub>6</sub>O<sub>3</sub>N<sub>1</sub><sup>79</sup>Br<sub>1</sub>-<sup>1</sup>H]<sup>-</sup> requires 229.9458 found 229.9449.  $\nu_{\max}$ (ATR): 1534, 1620, 1734, 3440 cm<sup>-1</sup>.

**Synthesis of (2-bromo-4-methyl-6-nitrophenoxy)trimethylsilane (5):** The phenol (1.1 mmol, 1.1 eq.) was refluxed with 1,1,1,3,3,3-hexamethyldisilazane (3.3 mmol, 3 eq.) for 3 hours. After cooling down the reaction mixture was concentrated *in vacuo* to give pure *title compound* as an orange oil. 93% yield. <sup>1</sup>H NMR (300 MHz, CDCl<sub>3</sub>) δ ppm 0.33 (9H, s, Si-CH<sub>3</sub>) 2.33 (3H, s, CH<sub>3</sub>) 7.54 (1H, d, *J* = 1 Hz, Ar-H<sub>3</sub>) 7.58 (1H, d, *J* = 2 Hz, Ar-H<sub>5</sub>). <sup>13</sup>C NMR (75 MHz, CDCl<sub>3</sub>) δ ppm 0.88 (Si-CH<sub>3</sub>), 20.1 (CH<sub>3</sub>), 117.7, 124.5 (C<sub>5</sub>), 132.3, 138.0, 142.7 (C<sub>3</sub>), 144.6. MS (EI+): [M]<sup>+</sup> 303.0. **Accurate Mass** (EI+): C<sub>10</sub>H<sub>14</sub>O<sub>3</sub><sup>79</sup>Br<sub>1</sub>Si<sub>1</sub>N<sub>1</sub> requires 302.9925 found 302.9928.  $\nu_{\max}$ (ATR): 1252, 1353, 1473, 1527, 2956 cm<sup>-1</sup>.

#### Synthesis of 2-nitro-4-methyl-6-(trimethylsilyl)phenol (6):<sup>1</sup>

Phenyllithium (5 mL, 2 M, 10 mmol) was added to the (2-bromo-4-methyl-6-nitrophenoxy)trimethylsilane (3.04 g, 10 mmol, 1 eq.) in THF (50 mL) at -78 °C over 10 min. The reaction mixture was stirred for 2 hrs and then quenched with water. After this allowed the reaction mixture to warm to room temperature poured into ether (50 mL) and washed with brine (3 x 50 mL). The organic layer was dried over MgSO<sub>4</sub> and concentrated *in vacuo*. The crude product was purified by column chromatography (silica; ether : petroleum ether 5 : 95) to afford the *title compound* as bright yellow solid. (1.75 g, 77.7 %; mp 94.2-94.6 °C). <sup>1</sup>H NMR (300 MHz, CDCl<sub>3</sub>) δ ppm 0.36 (9H, s, Si-CH<sub>3</sub>) 2.34 (3H, s, C-CH<sub>3</sub>) 7.47 (1H, d, *J* = 2 Hz, Ar-H<sub>3</sub>) 7.88 (1H, dd, *J* = 1.5 Hz, Ar-H<sub>3</sub>) 10.88 (1H, s, OH). <sup>13</sup>C NMR (75 MHz, CDCl<sub>3</sub>) δ ppm -1.3 (Si-CH<sub>3</sub>), 20.2 (C-CH<sub>3</sub>), 125.2 (C<sub>3</sub>), 127.1, 129.6, 131.4, 144.4 (C<sub>5</sub>), 157.1. MS (EI+): [M]<sup>+</sup> 225.1. **Accurate Mass** (EI+): C<sub>10</sub>H<sub>15</sub>O<sub>3</sub>N<sub>1</sub>Si<sub>1</sub> requires 225.0821 found 225.0816.  $\nu_{\max}$ (ATR): 1542, 1590, 1607, 1639, 2961, 3409 cm<sup>-1</sup>.

#### General procedure for triflate synthesis:

To the stirred mixture of substituted trimethylsilyl phenol (1 eq.), dry pyridine (3 eq.) in DCM (5 mL), Trifluoromethanesulphonic anhydride (1.1 eq.) was added slowly at 0 °C. The reaction mixture was then stirred for sixteen hours and then poured into ether (30 mL). The organic phase was washed with water (3 x 30 mL), dried over MgSO<sub>4</sub> and concentrated *in vacuo* to give the *title compound*,

**2-nitro-4-methyl-6-(trimethylsilyl)phenyl trifluoromethanesulfonate (7)** as an orange oil, 95 % yield. <sup>1</sup>H NMR (400 MHz, CDCl<sub>3</sub>) δ ppm 0.43 (9H, s, Si-CH<sub>3</sub>) 2.47 (3H, s, CH<sub>3</sub>) 7.57 (1H, dd, *J* = 2, 1 Hz, Ar-H<sub>5</sub>) 7.78 (1H, dd, *J* = 2, 1 Hz, Ar-H<sub>3</sub>). <sup>13</sup>C NMR (125 MHz, CDCl<sub>3</sub>) δ ppm -0.16 (Si-CH<sub>3</sub>), 20.8 (CH<sub>3</sub>), 127.5 (C<sub>3</sub>), 138.6, 139.3, 139.8, 141.1 (C<sub>5</sub>), 143.2. MS

<sup>1</sup> I. R. Hardcastle, R. F. Hunter, P. Quayle and P. N. Edwards, *Tetrahedron Lett.* 1994, **35**, 3805.b) I. R. Hardcastle, *University of Manchester*, PhD thesis, 1990. c) L. C. Raifford, *J. Am. Chem. Soc.* 1919, **41**, 2068.

(ES+): [M<sup>+</sup>] 380.0. **Accurate Mass**(ES+): C<sub>11</sub>H<sub>14</sub>O<sub>5</sub>Si<sub>1</sub>N<sub>1</sub>S<sub>1</sub><sup>19</sup>F<sub>3</sub> requires 380.0206 found 380.0206.  $\nu_{\max}$ (ATR): 1254, 1353, 1404, 1539, 1575, 2957 cm<sup>-1</sup>.

### Attempted aryne generation

#### Synthesis of 4-methyl-2-nitro-6-((trifluoromethyl)sulfonyl)phenol (10)

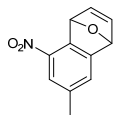

Tetrabutylammonium fluoride (3 mL, 1 M, 3 mmol) was added to the stirred mixture of 2-nitro-4-methyl-6-(trimethylsilyl)phenyl trifluoromethanesulfonate (0.32 g, 1 mmol), furan (0.1 mL, 2 mmol) and acetonitrile (5 mL). The reaction mixture was stirred for 16 hours and then poured into ether (30 mL). The organic layer was washed with HCl (2 M, 20 mL) and then with water (2 x 20 mL). The organic layer was dried and concentrated *in vacuo*. The crude product was purified by column chromatography (5-100% ether-petroleum ether) and afforded **7-methyl-5-nitro-1,4-dihydro-1,4-epoxynaphthalene (9)**, yield 9.9 mg (5%), as a viscous yellow oil. <sup>1</sup>H NMR (80 MHz, CDCl<sub>3</sub>) δppm 2.4 (3H, s, CH<sub>3</sub>) 5.75 (1H, s) 6.4 (1H, s) 7.1 (2H, s) 7.3 (1H, s) 7.55 (1H, s). **MS** (EI): m/e = 203 (M<sup>+</sup>). **Accurate Mass** (+EI): C<sub>11</sub>H<sub>9</sub>O<sub>3</sub>N<sub>1</sub> requires 203.0582 found 203.0579.  $\nu_{\max}$ (liq.): 1413, 1526, 1413 cm<sup>-1</sup>.

The major product from this reaction, a yellow-coloured, crystalline solid (0.15 g, 69.7 %; **mp** 100.8-101 °C) was identified as **4-methyl-2-nitro-6-((trifluoromethyl)sulfonyl)phenol (10)**. <sup>1</sup>H NMR (400 MHz, CDCl<sub>3</sub>) δppm 2.50 (3H, s, CH<sub>3</sub>) 8.17 (1H, d, *J* = 2 Hz, Ar-H<sub>3</sub>) 8.38 (1H, d, *J* = 2 Hz, Ar-H<sub>5</sub>) 11.47 (1H, s, OH). <sup>13</sup>C NMR (400 MHz, CDCl<sub>3</sub>) δppm 20.3(CH<sub>3</sub>), 112.8, 124.1, 130.7 (C<sub>5</sub>), 133.5, 141.6 (C<sub>3</sub>), 150.0. **MS** (EI+): 285. **Accurate Mass** (+EI): C<sub>8</sub>H<sub>6</sub>O<sub>5</sub>N<sub>1</sub><sup>19</sup>F<sub>3</sub>S<sub>1</sub> requires 284.9913 found 284.9907. **Microanalysis**: C<sub>8</sub>H<sub>6</sub>N<sub>1</sub>F<sub>3</sub>O<sub>5</sub>S requires C 33.7; H 2.1; N 4.9%. Found C 33.7; H 2.2; N 4.9%.  $\nu_{\max}$ (ATR): 1304, 1570, 1625, 3076, 3188 cm<sup>-1</sup>.

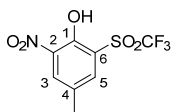

## ii. Truce Smiles rearrangement: initial observations

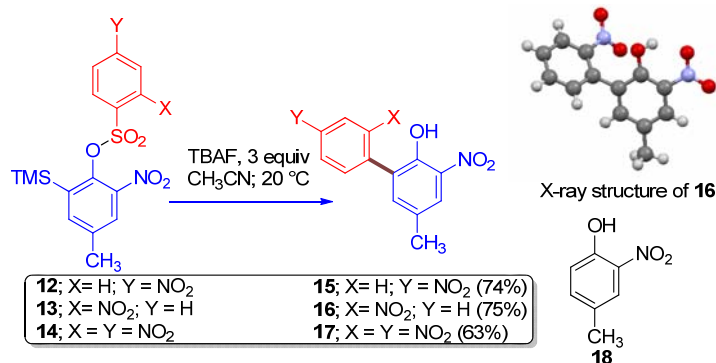

### General procedure for preparation of Arene sulfonate esters:<sup>1</sup>

To the stirred solution of sodium hydride (0.288 g, 12.12 mmol, 4.12 eq.) in dry THF (50 mL), substituted *o*-trimethylsilylphenol (3.01 mmol, 1 eq.) was added. The reaction mixture was stirred for thirty minutes and then substituted benzenesulphonyl chloride (3.31 mmol, 1.1 eq.) was added. The reaction mixture was stirred for one hour and then poured it into ether (50 mL). The organic phase was washed with water, brine, and dried over MgSO<sub>4</sub> and the reaction mixture taken to dryness *in vacuo*. The product was purified by column chromatography.

### Synthesis of 2-nitro-4-methyl-6-(trimethylsilyl)phenyl-4'-nitrobenzenesulfonate (**12**):

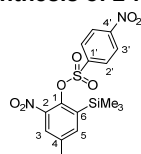

Column chromatography (silica, 10% ether, petroleum ether) afforded the compound as yellow oil (1.1 g, 81 %). <sup>1</sup>H NMR (300 MHz, CDCl<sub>3</sub>) δ ppm 0.44 (9H, s), 2.46 (3H, s, CH<sub>3</sub>) 7.57 (1H, d, *J* = 2 Hz, Ar-H<sub>5</sub>) 7.67 (1H, d, *J* = 2 Hz, Ar-H<sub>3</sub>) 8.17 (2H, d, *J* = 8 Hz, Ar-H<sub>2</sub>) 8.45 (2H, d, *J* = 8 Hz, Ar-H<sub>3</sub>). <sup>13</sup>C NMR (75 MHz, CDCl<sub>3</sub>) δ ppm 0.06 (Si-CH<sub>3</sub>), 30.7 (CH<sub>3</sub>), 124.5 (C<sub>2</sub>), 127.0 (C<sub>3</sub>), 128.5, 129.9 (C<sub>3</sub>), 138.3, 139.1, 140.9, 141.1 (C<sub>5</sub>), 143.5, 151.2. **MS (EI+)**: [M+Na]<sup>+</sup> 433.0. **Accurate Mass (ES+)**: [C<sub>16</sub>H<sub>18</sub>O<sub>7</sub>S<sub>1</sub>Si<sub>1</sub>N<sub>2</sub>Na<sub>1</sub>]<sup>+</sup> requires 433.0497 found 433.0508. **ν<sub>max</sub>(ATR)**: 1203, 1229, 1358, 1511, 1560, 1601, 2984 cm<sup>-1</sup>.

### Synthesis of 2-nitro-4-methyl-6-(trimethylsilyl)phenyl-2'-nitrobenzenesulfonate (**13**):

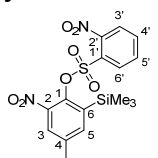

Column chromatography (silica, 10% ether, petroleum ether) afforded the compound as oil (1.13 g, 83 %). <sup>1</sup>H NMR (300 MHz, CDCl<sub>3</sub>) δ ppm 0.47 (9H, s, Si-CH<sub>3</sub>) 2.45 (3H, s, CH<sub>3</sub>) 7.57 (1H, d, *J*=2.2 Hz, Ar-H<sub>5</sub>) 7.63 (1H, d, *J* = 2.2 Hz, Ar-H<sub>3</sub>) 7.76 - 7.89 (2H, m, Ar-H<sub>5,6</sub>) 7.93 (1H, td, *J* = 8, 1.5 Hz, Ar-H<sub>4</sub>) 8.07 (1H, dd, *J* = 7.8, 1.5 Hz, Ar-H<sub>3</sub>). <sup>13</sup>C NMR (75 MHz, CDCl<sub>3</sub>) δ ppm -0.24 (Si-CH<sub>3</sub>), 20.7 (C-CH<sub>3</sub>), 125.5 (C<sub>4</sub>), 126.8 (C<sub>3</sub>), 130.5 (C<sub>3</sub>), 131.0 (C<sub>6</sub>), 132.6 (C<sub>5</sub>), 135.4, 138.0, 139.2, 141.1 (C<sub>5</sub>), 142.6, 142.9, 148.0. **MS (ES+)**: [M+Na]<sup>+</sup> 433.0. **Accurate Mass (ES+)**: C<sub>16</sub>H<sub>18</sub>O<sub>7</sub>S<sub>1</sub>Si<sub>1</sub>N<sub>2</sub>Na<sub>1</sub> requires 433.0502. found 433.0499. **ν<sub>max</sub>(ATR)**: 1213, 1235, 1347, 1507, 1569, 1621, 3001 cm<sup>-1</sup>.

### Synthesis of 2-nitro-4-methyl-6-(trimethylsilyl)phenyl 2',4'-dinitrobenzenesulfonate (**14**):

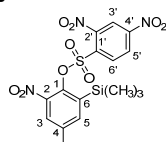

Column chromatography (silica, 10% ether, petroleum ether) afforded the compound as oil (0.91 g, 74 %). <sup>1</sup>H NMR (300 MHz, CDCl<sub>3</sub>) δ ppm 0.49 (9H, s, Si-CH<sub>3</sub>) 2.46 (3H, s, C-CH<sub>3</sub>) 7.59 (1H, d, *J* = 2.2 Hz, Ar-H<sub>5</sub>) 7.68 (1H, d, *J* = 2.2 Hz, Ar-H<sub>3</sub>) 8.30 (1H, d, *J* = 8.5 Hz, Ar-H<sub>6</sub>) 8.60 (1H, dd, *J*=8.5, 2.2 Hz, Ar-H<sub>5</sub>) 8.79 (1H, d, *J* = 2.2 Hz, Ar-H<sub>3</sub>). <sup>13</sup>C NMR (75 MHz, CDCl<sub>3</sub>) δ ppm -0.33 (Si-CH<sub>3</sub>), 20.8 (C-CH<sub>3</sub>), 120.7 (C<sub>3</sub>), 126.9 (C<sub>3</sub>), 127.0 (C<sub>5</sub>), 132.5 (C<sub>6</sub>), 136.1, 138.6, 139.1, 141.5 (C<sub>5</sub>), 142.2, 142.6, 150.7, 163.8. **ν<sub>max</sub>(ATR)**: 1133, 1197, 1220, 1348, 1519, 1540, 1556, 1608, 2980 cm<sup>-1</sup>.

### General method for Truce-Smiles rearrangement leading to bi-aryl synthesis:

To a stirred solution of trimethylsilylsulfonate ester (1 eq.) and furan (3 eq.) in dry acetonitrile (12 mL), Tetrabutylammonium fluoride (1 M, 3 eq.) was added slowly. The reaction mixture was stirred at rt for sixteen hours and then poured into ether. The resulting mixture was washed with dilute HCl (3 N, 10 mL) and then with water (2 x 10 mL), dried over MgSO<sub>4</sub> and the reaction mixture taken to dryness *in vacuo*. Column chromatography (silica, ether : petrol) afforded the *pure compound*.

### Synthesis of 5-methyl-3,4'-dinitro-[1,1'-biphenyl]-2-ol (**15**):

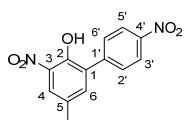

Column chromatography (silica, 10% ether, petroleum ether) afforded the *title compound* as bright yellow solid (0.349 g, 74.4% ; mp 196-197 °C). <sup>1</sup>H NMR (300 MHz, CDCl<sub>3</sub>) δ ppm 2.43 (3H, s, CH<sub>3</sub>) 7.50 (1H, d, *J* = 2 Hz, Ar-H<sub>6</sub>) 7.75 (2H, d, *J* = 9 Hz, Ar-H<sub>2,6</sub>) 8.03 (1H, d, *J* = 1.5 Hz, Ar-H<sub>4</sub>) 8.32 (2H, d, *J* = 9 Hz, Ar-H<sub>3,5</sub>) 10.96 (1H, s, OH). <sup>13</sup>C NMR (75 MHz, CDCl<sub>3</sub>) δ ppm 20.4 (CH<sub>3</sub>), 123.5 (C<sub>3,5</sub>), 125.1 (C<sub>4</sub>), 127.9, 130.2, 130.3 (C<sub>2,6</sub>), 133.9, 139.3, 142.5 (C<sub>6</sub>), 146.5, 150.5. **MS (EI+)**: [M] 273. **Accurate Mass (ES-)**: [C<sub>13</sub>H<sub>10</sub>O<sub>5</sub>N<sub>2</sub>-<sup>1</sup>H] requires 273.0511 found 273.0516. **Microanalysis**: C<sub>13</sub>H<sub>10</sub>N<sub>2</sub>O<sub>5</sub> requires C 57.0; H 3.7; N 10.2%. Found C 57.0; H 3.3; N 10.1%. **ν<sub>max</sub>(ATR)**: 1138, 1253, 1346, 1518, 1535 2968, 3087 cm<sup>-1</sup>.

### Synthesis of 5-methyl-2',3-dinitro-[1,1'-biphenyl]-2-ol (**16**):

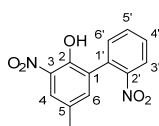

Column chromatography (silica, 10% ether, petroleum ether) afforded the *title compound* as bright yellow solid (0.359 g, 75 % ; mp 193-194 °C). <sup>1</sup>H NMR (300 MHz, CDCl<sub>3</sub>) δ ppm 2.42 (3H, s, CH<sub>3</sub>) 7.39 - 7.45 (2H, m, Ar-H<sub>3,6</sub>) 7.59 (1H, td, *J* = 8, 1.5 Hz, Ar-H<sub>4</sub>) 7.72 (1H, td, *J* = 8, 2 Hz, Ar-H<sub>5</sub>) 7.98 (1H, s, Ar-H<sub>4</sub>) 8.10 (1H, dd, *J* = 8, 1 Hz, Ar-H<sub>3</sub>) 10.73 (1H, s, OH). <sup>13</sup>C NMR (75 MHz, CDCl<sub>3</sub>) δ ppm 20.4 (CH<sub>3</sub>), 124.5 (C<sub>3</sub>), 124.6 (C<sub>4</sub>), 129.3 (C<sub>4</sub>), 129.7, 130.0, 130.1, 132.4, 133.2, 138.2 (C<sub>5</sub>), 149.1 (C<sub>6</sub>), 150.3. **MS (ES+)**: [M+Na]<sup>+</sup> 297.3. **Accurate Mass (ES+)**: C<sub>13</sub>H<sub>10</sub>O<sub>5</sub>N<sub>2</sub>Na<sub>1</sub> requires 297.0494 found 297.0487. **Microanalysis**: C<sub>13</sub>H<sub>10</sub>N<sub>2</sub>O<sub>5</sub> requires C 56.9; H 3.6; N 10.2%. Found C 56.1; H 3.3; N 10.1%. **ν<sub>max</sub>(ATR)**: 1126, 1344, 1401, 1458, 1517, 2915, 3228 cm<sup>-1</sup>.

### Synthesis of 5-methyl-2',3,4'-trinitro-[1,1'-biphenyl]-2-ol (17):

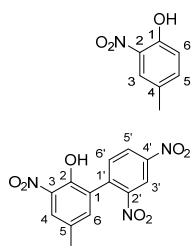

**4-methyl-2-nitrophenol (18):**<sup>2</sup> Column chromatography (silica, 5% ether : petroleum ether) afforded the *title compound* as an yellowish oil (0.023 g, 13 %). <sup>1</sup>H NMR (300 MHz, CDCl<sub>3</sub>) δ ppm 2.35 (3H, s, CH<sub>3</sub>) 7.06 (1H, d, *J* = 8.5 Hz, Ar-H<sub>5</sub>) 7.41 (1H, dd, *J* = 8.5, 2 Hz, Ar-H<sub>6</sub>) 7.91 (1H, s, Ar-H<sub>3</sub>) 10.46 (1H, s, OH). <sup>13</sup>C NMR (300 MHz, CDCl<sub>3</sub>) δ ppm 20.3 (CH<sub>3</sub>), 119.3 (C<sub>6</sub>), 124.5 (C<sub>3</sub>), 130.1, 133.2, 138.8 (C<sub>5</sub>), 153.2. Further elution (10% ether, petroleum ether) afforded **5-methyl-2',3,4'-trinitro-[1,1'-biphenyl]-2-ol (17)** as bright yellow solid (0.401 g, 63 % ; mp 177-179 C°). <sup>1</sup>H NMR (400 MHz, CDCl<sub>3</sub>) δ ppm 2.49 (3H, s, CH<sub>3</sub>) 7.46 (1H, d, *J* = 2 Hz, Ar-H<sub>6</sub>) 7.66 (1H, d, *J* = 8 Hz, Ar-H<sub>6</sub>) 8.07 (1H, d, *J* = 1 Hz, Ar-H<sub>4</sub>) 8.56 (1H, dd, *J* = 8, 2 Hz, Ar-H<sub>5</sub>) 8.94 (1H, d, *J* = 2 Hz, Ar-H<sub>3</sub>) 10.75 (1H, s, OH). <sup>13</sup>C NMR (125 MHz, CDCl<sub>3</sub>) δ ppm 20.5 (CH<sub>3</sub>), 120.1 (C<sub>3</sub>), 125.8 (C<sub>4</sub>), 127.3 (C<sub>5</sub>), 127.5, 130.6, 133.4, 133.7 (C<sub>6</sub>), 136.9, 137.8 (C<sub>6</sub>), 147.3, 149.2, 149.8. MS (ES+): [M]<sup>+</sup> 320.1. Accurate Mass (ES+): C<sub>13</sub>H<sub>9</sub>O<sub>7</sub>N<sub>3</sub>Na<sub>1</sub> requires 343.0441 found 343.0452. ν<sub>max</sub>(ATR): 1527, 1548, 1640, 2930, 3101 cm<sup>-1</sup>.

### iii. Synthesis of substrates for Truce-Smith rearrangements – electronic effects

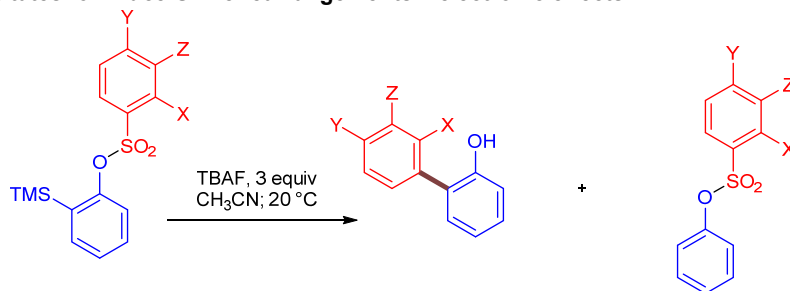

|                                             |                                                                |                                                  |
|---------------------------------------------|----------------------------------------------------------------|--------------------------------------------------|
| <b>19</b> ; X = Z = H; Y = NO <sub>2</sub>  | <b>25</b> ; X = Z = H; Y = NO <sub>2</sub> (44%) <sup>a</sup>  | <b>31</b> ; X = Z = H; Y = NO <sub>2</sub> (19%) |
| <b>20</b> ; X = NO <sub>2</sub> ; Y = Z = H | <b>26</b> ; X = NO <sub>2</sub> ; Y = Z = H (39%) <sup>a</sup> | <b>32</b> ; X = NO <sub>2</sub> ; Y = Z = H (nd) |
| <b>21</b> ; X = Y = NO <sub>2</sub> ; Z = H | <b>27</b> ; X = Y = NO <sub>2</sub> ; Z = H (49%)              |                                                  |
| <b>22</b> ; X = Y = H; Y = Cl               | <b>28</b> ; X = Y = H; Y = Cl (0%)                             | <b>33</b> ; X = Z = H; Y = Cl (75%)              |
| <b>23</b> ; X = Y = Z = H                   | <b>29</b> ; X = Y = Z = H (0%)                                 | <b>34</b> ; X = Y = H (88%)                      |
| <b>24</b> ; X,Z = (CH) <sub>4</sub>         | <b>30</b> ; X,Z = (CH) <sub>4</sub> (0%)                       | <b>35</b> ; X,Z = (CH) <sub>4</sub> (84%)        |

#### Synthesis of (2-bromophenoxy)trimethylsilane:<sup>3</sup>

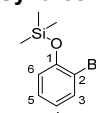 1,1,1,3,3,3-hexamethyldisilazane (12.18 mL, 61.96 mmol) was added slowly to o-bromophenol (17.15 g, 99.14 mmol) at rt. The reaction mixture was refluxed for three hours. The product was isolated by distillation as colourless oil (12.6 g, 84 %). <sup>1</sup>H NMR (300 MHz, CDCl<sub>3</sub>) δ ppm 0.33 (9H, s, CH<sub>3</sub>) 6.82 - 6.93 (2H, m, Ar-H<sub>6,4</sub>) 7.18 (1H, t, J = 8 Hz, Ar-H<sub>5</sub>) 7.54 (1H, dd, J = 8, 1.5 Hz, Ar-H<sub>3</sub>). <sup>13</sup>C NMR (300 MHz, CDCl<sub>3</sub>) δ ppm 0.35(CH<sub>3</sub>), 115.6, 120.7 (C<sub>3</sub>), 122.6 (C<sub>5</sub>), 128.3 (C<sub>4</sub>), 133.3 (C<sub>6</sub>), 152.4. MS (EI+): [M<sup>+</sup>] 244. Accurate Mass (EI+): C<sub>9</sub>H<sub>13</sub>O<sub>1</sub>Si<sub>1</sub><sup>79</sup>Br<sub>1</sub> requires 243.9914 found 243.9913.  $\nu_{\max}$ (ATR): 1284, 1474, 1583, 2959, 3064 cm<sup>-1</sup>.

#### Synthesis of 2-(trimethylsilyl)phenol:<sup>4</sup>

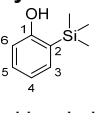 A solution of 2-bromo-1-trimethylsilyloxybenzene (7.6 g, 30.96 mmol, 1 eq.) in dry THF (10 mL) was added slowly to the stirred solution of *n*-BuLi (26.5 mL, 46.44 mmol, 1.5 eq.) in dry THF (10 mL) at -78 °C under nitrogen. At -78 °C stirred the reaction mixture for three hours and then at rt for one hour. Upon recooling to -78 °C the reaction mixture quenched by adding saturated ammonium chloride (3 mL). The reaction mixture was allowed to room temperature and then extracted it with ethyl acetate (2 x 15 mL). The organic phase was washed with water, brine, and dried over MgSO<sub>4</sub> and the reaction mixture taken to dryness *in vacuo*. The product obtained as light brown oil in colour which is used without further purification (4.54 g, 83%). <sup>1</sup>H NMR (300 MHz, CDCl<sub>3</sub>) δ ppm 0.37 (s, 9H, CH<sub>3</sub>) 5.09 (1H, br. s., OH) 6.70 (1H, d, J = 8 Hz, Ar-H<sub>6</sub>) 6.98 (1H, td, J = 7, 1 Hz, Ar-H<sub>4</sub>) 7.28 (1H, td, J = 8, 2 Hz, Ar-H<sub>5</sub>) 7.43 (1H, dd, J = 7, 2 Hz, Ar-H<sub>3</sub>). <sup>13</sup>C NMR (75 MHz, CDCl<sub>3</sub>) δ ppm -0.99 (CH<sub>3</sub>), 114.4 (C<sub>6</sub>), 120.4 (C<sub>2,6</sub>), 128.4, 130.6 (C<sub>5</sub>), 135.3 (C<sub>3</sub>), 160.4. MS (EI+): [M<sup>+</sup>] 166. Accurate Mass (EI+): C<sub>9</sub>H<sub>14</sub>O<sub>1</sub>Si<sub>1</sub> requires 166.0808 found 166.0813.  $\nu_{\max}$ (ATR): 1270, 1368, 1592, 3067, 2953 cm<sup>-1</sup>

Sulfonate esters (19)-(24) were prepared using the general method as described above.

#### Synthesis of 2-(trimethylsilyl)phenyl-4'-nitrobenzenesulfonate (19):

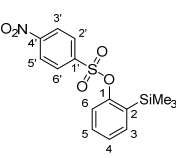 The product was purified by recrystallisation (ether : petroleum ether) as white crystalline powder (1.05 g, 90.6 %; mp 134-134.4 °C). <sup>1</sup>H NMR (300 MHz, CDCl<sub>3</sub>) δ ppm 0.28 (9H, s, CH<sub>3</sub>) 7.04 (1H, dd, J = 8, 1 Hz, Ar-H<sub>6</sub>) 7.27 - 7.36 (2H, m, Ar-H<sub>4,5</sub>) 7.50 (1H, dd, J = 7, 1 Hz, Ar-H<sub>3</sub>) 8.19 (2H, d, J = 9 Hz, Ar-H<sub>2,6</sub>) 8.44 (2H, d, J = 9 Hz, Ar-H<sub>3,5</sub>). <sup>13</sup>C NMR (75 MHz, CDCl<sub>3</sub>) δ ppm -0.62 (Si-CH<sub>3</sub>), 119.1 (C<sub>4</sub>), 124.5 (C<sub>3,5</sub>), 126.6 (C<sub>6</sub>), 129.6 (C<sub>3</sub>), 130.7 (C<sub>2,6</sub>), 132.6, 136.3 (C<sub>5</sub>), 142.5, 150.9, 154.8. Microanalysis: C<sub>15</sub>H<sub>17</sub>O<sub>5</sub>Si<sub>1</sub>N requires C 51.3; H 4.9, N 4.0 %. Found C 51.0; H 4.8 %; N 4.0%. MS (ES+): [M+Na]<sup>+</sup> 374. Accurate Mass (+EI): [C<sub>15</sub>H<sub>17</sub>N<sub>1</sub>O<sub>5</sub>Si<sub>1</sub>Na<sub>1</sub>]<sup>+</sup> requires 374.0489 found 374.0481.; (EI+): [C<sub>15</sub>H<sub>17</sub>N<sub>1</sub>O<sub>5</sub>Si<sub>1</sub>-CH<sub>3</sub>]<sup>+</sup> requires 336.0356 found 336.0351.  $\nu_{\max}$ (ATR): 1176, 1311, 1348, 1528, 2956 cm<sup>-1</sup>.

#### Synthesis of 2-(trimethylsilyl)phenyl-2',4'-dinitrobenzenesulfonate (21):

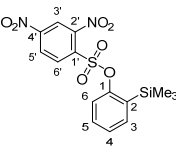 The product was purified by recrystallisation (DCM : hexane) as light yellow powder (1 g, 76%; mp 134-135 °C). <sup>1</sup>H NMR (300 MHz, CDCl<sub>3</sub>) δ ppm 0.34 (9H, s, CH<sub>3</sub>) 6.88 - 6.93 (1H, m, Ar-H<sub>6</sub>) 7.28 - 7.34 (2H, m, Ar-H<sub>4,5</sub>) 7.53 - 7.58 (1H, m, Ar-H<sub>3</sub>) 8.38 (1H, d, J = 8.5 Hz, Ar-H<sub>6</sub>) 8.61 (1H, dd, J = 8.5, 2.1 Hz, Ar-H<sub>5</sub>) 8.72 (1H, d, J = 2.2 Hz, Ar-H<sub>3</sub>). <sup>13</sup>C NMR (75 MHz, CDCl<sub>3</sub>) δ ppm -0.63 (Si-CH<sub>3</sub>), 119.6 (C<sub>4</sub>), 120.8 (C<sub>3</sub>), 126.7 (C<sub>6</sub>), 127.1 (C<sub>5</sub>), 130.8 (C<sub>3</sub>), 132.9 (C<sub>6</sub>), 133.1, 135.6, 136.4 (C<sub>5</sub>), 148.7, 150.7, 154.7. Microanalysis: C<sub>15</sub>H<sub>16</sub>N<sub>2</sub>O<sub>7</sub>SSi requires C 45.4; H 4.1; N 7.1%; S 8.1%. Found C 45.1; H 4.1; N 7.1%; S 8.0%. MS (ES+): [M+Na]<sup>+</sup> 419. Accurate Mass (EI+): [C<sub>15</sub>H<sub>16</sub>N<sub>2</sub>O<sub>7</sub>Si<sub>1</sub>-CH<sub>3</sub>]<sup>+</sup> requires 381.0213 found 381.0217.  $\nu_{\max}$ (ATR): 1184, 1348, 1382, 1537, 1557, 3099, 3105, 3312 cm<sup>-1</sup>.

<sup>3</sup> D. Pena, A. Cobas, D. Perez and E. Guitian, *Synthesis*, 2002, **10**, 1454. b) G. M. Tierney, Third Year Undergraduate Project Report, *University of Manchester*, 1990-1991. c) T. Ikawa, A. Takagi, Y. Kurita, K. Saito, K. Azechi, M. Egi, K. Kakiguchi, Y. Kita and S. Akai, *Angew. Chem. Int. Ed.* 2010, **49**, 5563.

<sup>4</sup> T. Ikawa, T. Nishiyama, T. Nosaki, A. Takagi and S. Akai, *Org. Lett.* 2011, **13**, 1730.

### Synthesis of 2-(trimethylsilyl)phenyl-2'-nitrobenzenesulfonate (20):

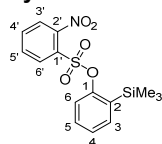

The product was purified by recrystallisation (DCM : petroleum ether) as white crystalline powder (1 g, 86.2 %; **mp** 98-100 °C).  $^1\text{H NMR}$  (300 MHz,  $\text{CDCl}_3$ )  $\delta$  ppm 0.32 (9H, s,  $\text{CH}_3$ ) 6.94 - 6.99 (1H, m, Ar- $\text{H}_4$ ) 7.24 - 7.30 (2H, m, Ar- $\text{H}_{3,6}$ ) 7.49 - 7.53 (1H, m, Ar- $\text{H}_5$ ) 7.80 (1H, dd,  $J = 7.5, 2.0$  Hz, Ar- $\text{H}_6$ ) 7.83 - 7.90 (2H, m, Ar- $\text{H}_{4,5}$ ) 8.15 (1H, d,  $J = 8$  Hz, Ar- $\text{H}_3$ ).  $^{13}\text{C NMR}$  (75 MHz,  $\text{CDCl}_3$ )  $\delta$  ppm -0.85 (Si- $\text{CH}_3$ ), 119.5 ( $\text{C}_4$ ), 124.9 ( $\text{C}_4$ ), 126.4 ( $\text{C}_6$ ), 130.4 ( $\text{C}_3$ ), 130.5, 130.9 ( $\text{C}_3$ ), 132.1 ( $\text{C}_6$ ), 135.9 ( $\text{C}_5$ ), 134.9 ( $\text{C}_5$ ), 137.2, 148.3, 154.7. **MS** (EI+):  $[\text{M}]^+$  336. **Accurate Mass** (EI+):  $[\text{C}_{15}\text{H}_{17}\text{N}_1\text{O}_5\text{S}_1\text{Si}_1\text{-CH}_3]^+$  requires 336.0356 found 336.0351. **Microanalysis**:  $\text{C}_{15}\text{H}_{17}\text{NO}_5\text{SSi}$  requires C 51.3; H 4.9; N 4.0%; S 9.1%. Found C 51.0; H 5.1; N 3.9%; S 9.0%.  $\nu_{\text{max}}(\text{ATR})$ : 1192, 1364, 1375, 1432, 1538, 2951  $\text{cm}^{-1}$ .

### Synthesis of 2-(trimethylsilyl)phenyl-2',4'-dinitrobenzenesulfonate (21):

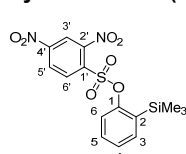

The product was purified by recrystallisation (DCM : hexane) as light yellow powder (1 g, 76%; **mp** 134-135 °C).  $^1\text{H NMR}$  (300 MHz,  $\text{CDCl}_3$ )  $\delta$  ppm 0.34 (9H, s,  $\text{CH}_3$ ) 6.88 - 6.93 (1H, m, Ar- $\text{H}_6$ ) 7.28 - 7.34 (2H, m, Ar- $\text{H}_{4,5}$ ) 7.53 - 7.58 (1H, m, Ar- $\text{H}_3$ ) 8.38 (1H, d,  $J = 8.5$  Hz, Ar- $\text{H}_6$ ) 8.61 (1H, dd,  $J = 8.5, 2.1$  Hz, Ar- $\text{H}_5$ ) 8.72 (1H, d,  $J = 2.2$  Hz, Ar- $\text{H}_3$ ).  $^{13}\text{C NMR}$  (75 MHz,  $\text{CDCl}_3$ )  $\delta$  ppm -0.63 (Si- $\text{CH}_3$ ), 119.6 ( $\text{C}_4$ ), 120.8 ( $\text{C}_3$ ), 126.7 ( $\text{C}_6$ ), 127.1 ( $\text{C}_5$ ), 130.8 ( $\text{C}_3$ ), 132.9 ( $\text{C}_6$ ), 133.1, 135.6, 136.4 ( $\text{C}_5$ ), 148.7, 150.7, 154.7. **Microanalysis**:  $\text{C}_{15}\text{H}_{16}\text{N}_2\text{O}_7\text{SSi}$  requires C 45.4; H 4.1; N 7.1%; S 8.1%. Found C 45.1; H 4.1; N 7.1%; S 8.0%. **MS** (ES+):  $[\text{M}+\text{Na}]^+$  419. **Accurate Mass** (EI+):  $[\text{C}_{15}\text{H}_{16}\text{N}_2\text{O}_7\text{S}_1\text{Si}_1\text{-CH}_3]^+$  requires 381.0213 found 381.0217.  $\nu_{\text{max}}(\text{ATR})$ : 1184, 1348, 1382, 1537, 1557, 3099, 3105, 3312  $\text{cm}^{-1}$ .

### Synthesis of 2-(trimethylsilyl)phenyl-4'-chlorobenzenesulfonate (22):

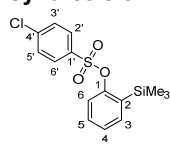

The product was purified by recrystallisation (ether : petroleum ether) as white crystalline powder (1 g, 89.9%, **mp** 114-115 °C).  $^1\text{H NMR}$  (300 MHz,  $\text{CDCl}_3$ )  $\delta$  ppm 0.28 (9H, s,  $\text{CH}_3$ ) 7.08 (1H, dd,  $J = 8, 1$  Hz, Ar- $\text{H}_6$ ) 7.20 - 7.27 (1H, m, Ar- $\text{H}_4$ ) 7.27 - 7.34 (1H, m, Ar- $\text{H}_5$ ) 7.48 (1H, dd,  $J = 7, 2$  Hz, Ar- $\text{H}_3$ ) 7.56 (2H, d,  $J = 8$  Hz, Ar- $\text{H}_{3,5}$ ) 7.92 (2H, d,  $J = 8$  Hz, Ar- $\text{H}_{2,6}$ ).  $^{13}\text{C NMR}$  (75 MHz,  $\text{CDCl}_3$ )  $\delta$  ppm -0.64 (Si- $\text{CH}_3$ ), 119.2 ( $\text{C}_4$ ), 126.3 ( $\text{C}_6$ ), 129.6 ( $\text{C}_3$ ), 130.5 ( $\text{C}_{2,6}$ ), 132.5 ( $\text{C}_{3,5}$ ), 135.5, 136.0 ( $\text{C}_5$ ), 140.6, 150.1, 155.0. **GC/MS** (EI+):  $[\text{M}]^+$  325. **Accurate Mass** (EI+):  $[\text{C}_{15}\text{H}_{17}\text{O}_3\text{S}_1\text{Si}_1^{35}\text{Cl}_1\text{-CH}_3]^+$  requires 325.0116 found 325.0108.  $\nu_{\text{max}}(\text{ATR})$ : 1176, 1376, 1442, 1589, 2954  $\text{cm}^{-1}$ .

### Synthesis of 2-(trimethylsilyl)phenyl benzenesulfonate (23):

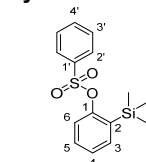

Colourless oil (0.9 g, 89.9 %).  $^1\text{H NMR}$  (300 MHz,  $\text{CDCl}_3$ )  $\delta$  ppm 0.28 (9H, s,  $\text{CH}_3$ ) 7.10 (1H, dd,  $J = 8, 1$  Hz, Ar- $\text{H}_6$ ) 7.19 - 7.34 (2H, m, Ar- $\text{H}_4$ ) 7.48 (1H, dd,  $J = 7, 2$  Hz, Ar- $\text{H}_3$ ) 7.56 - 7.63 (2H, m, Ar- $\text{H}_3$ ) 7.68 - 7.74 (1H, m, Ar- $\text{H}_4$ ) 8.00 (2H, dd,  $J = 7, 1$  Hz, Ar- $\text{H}_2$ ).  $^{13}\text{C NMR}$  (75 MHz,  $\text{CDCl}_3$ )  $\delta$  ppm -0.67 (Si- $\text{CH}_3$ ), 119.3 ( $\text{C}_4$ ), 126.1 ( $\text{C}_6$ ), 128.2 ( $\text{C}_2$ ), 129.2 ( $\text{C}_3$ ), 130.5 ( $\text{C}_3$ ), 132.5, 134.1 ( $\text{C}_4$ ), 135.8 ( $\text{C}_5$ ), 137.1, 155.1. **MS** (EI+):  $[\text{M}]^+$  307. **Accurate Mass** (EI+):  $[\text{C}_{15}\text{H}_{17}\text{O}_3\text{S}_1\text{Si}_1\text{-CH}_3]^+$  requires 291.0506 found 291.0504. **Microanalysis**:  $\text{C}_{15}\text{H}_{18}\text{O}_3\text{SSi}$  requires C 58.7; H 6.0; S 10.4%. Found C 58.7; H 6.4; S 10.4%.  $\nu_{\text{max}}(\text{ATR})$ : 1193, 1371, 1431, 2954  $\text{cm}^{-1}$ .

### Synthesis of 2-(trimethylsilyl)phenyl naphthalene-1-sulfonate (24):

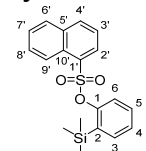

The product was purified by recrystallisation (DCM : petroleum ether) as white crystalline powder (1.0 g, 85.5 %; **mp** 114-115 °C).  $^1\text{H NMR}$  (300 MHz,  $\text{CDCl}_3$ )  $\delta$  ppm 0.34 (9H, s,  $\text{CH}_3$ ) 6.67 (1H, dd,  $J = 7, 1.5$  Hz, Ar- $\text{H}_6$ ) 7.11 - 7.23 (2H, m, Ar- $\text{H}_{4,5}$ ) 7.49 (1H, dd,  $J = 7, 2$  Hz, Ar- $\text{H}_3$ ) 7.61 (1H, t,  $J = 8$ , Ar- $\text{H}_7$ ) 7.69 (1H, t,  $J = 8$ , Ar- $\text{H}_8$ ), 7.75 (1H, t,  $J = 7.00$  Hz, Ar- $\text{H}_3$ ) 8.01 (1H, d,  $J = 8$  Hz, Ar- $\text{H}_2$ ) 8.20 (1H, d,  $J = 8$  Hz, Ar- $\text{H}_4$ ) 8.31 (1H, dd,  $J = 8, 1$  Hz, Ar- $\text{H}_6$ ) 8.81 (1H, d,  $J = 8$  Hz, Ar- $\text{H}_9$ ).  $^{13}\text{C NMR}$  (75 MHz,  $\text{CDCl}_3$ )  $\delta$  ppm -0.62 (Si- $\text{CH}_3$ ), 119.2 ( $\text{C}_4$ ), 124.0, 125.1, 126.1 ( $\text{C}_6$ ), 127.4 ( $\text{C}_3$ ), 128.4 ( $\text{C}_7$ ), 128.8 ( $\text{C}_2$ ), 129.9 ( $\text{C}_6$ ), 130.4, 132.9 ( $\text{C}_3$ ), 133.3, 134.2, 135.5 ( $\text{C}_4$ ), 135.8 ( $\text{C}_5$ ), 155.0. **MS** (EI+):  $[\text{M}]^+$  341. **Accurate Mass** (EI+):  $[\text{C}_{19}\text{H}_{20}\text{O}_3\text{S}_1\text{Si}_1\text{-CH}_3]^+$  requires 341.0662 found 341.0655.  $\nu_{\text{max}}(\text{ATR})$ : 1192, 1367, 1434, 1562, 2952  $\text{cm}^{-1}$ .

### General method for synthesis of bi-aryls:

To a stirred solution of the sulfonate ester compound (1 eq.) and furan (3 eq.) in dry acetonitrile (12 mL), Tetrabutylammonium fluoroide (1 M, 3 eq.) was added slowly. The reaction mixture was stirred at rt for sixteen hours and then poured into ether. The resulting mixture was washed with dilute HCl (3 N, 10 mL) and then with water (2 x 10 mL), dried over  $\text{MgSO}_4$  and the reaction mixture taken to dryness *in vacuo*. Column chromatography (silica, ether : petrol) afforded the *pure compound*.

### Synthesis of 4'-nitro-[1,1'-biphenyl]-2-ol (25):<sup>5</sup>

The *title compound* was prepared by using general procedure using 2-(trimethylsilyl)phenyl-4'-nitrobenzenesulfonate 19.

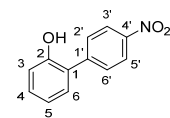

**Fraction A:** Column chromatography (silica, 10% ether, petroleum ether) afforded the *title compound* as bright yellow solid (44.4 %; **mp** 110.5-113 °C, Lit 107-108 °C).  $^1\text{H NMR}$  (300 MHz,  $\text{CDCl}_3$ )  $\delta$  ppm 5.28 (1H, s, OH) 6.97 (1H, dd,  $J = 8, 1$  Hz, Ar- $\text{H}_3$ ) 7.03 - 7.10 (1H, m, Ar- $\text{H}_4$ ) 7.28 - 7.37 (2H, m, Ar- $\text{H}_{5,6}$ ) 7.73 (2H, dd,  $J = 8, 2$  Hz, Ar- $\text{H}_{2,6}$ ) 8.31 (2H, dd,  $J = 8, 2$  Hz, Ar- $\text{H}_{3,5}$ ).  $^{13}\text{C NMR}$  (75 MHz,  $\text{CDCl}_3$ )  $\delta$  ppm 116.5 ( $\text{C}_3$ ), 121.5 ( $\text{C}_4$ ), 123.8 ( $\text{C}_{3,5}$ ), 126.1, 130.1 ( $\text{C}_{2,6}$ ), 130.2 ( $\text{C}_5$ ), 130.5 ( $\text{C}_6$ ), 144.6, 144.9, 152.4. **MS** (ES-):  $[\text{M}]^-$  214. **Accurate Mass** (ES-):  $[\text{C}_{12}\text{H}_9\text{O}_3\text{N}_1\text{-}^1\text{H}]^-$  requires 214.0502 found 214.0509. **Microanalysis**:  $\text{C}_{12}\text{H}_9\text{N}_1\text{O}_3$  requires C 66.9; H 4.2; N 6.5%. Found C 66.9; H 4.4; N 6.5%.  $\nu_{\text{max}}(\text{ATR})$ : 1332, 1455, 1503, 1592, 3473  $\text{cm}^{-1}$ .

**Fraction B: phenyl-4'-nitrobenzenesulfonate (31):**<sup>6</sup> Column chromatography (silica, 20% ether, petroleum ether) afforded the *title compound* as bright yellow solid (19%-36%\*\*, **mp** 77-78 °C).  $^1\text{H NMR}$  (300 MHz,  $\text{CDCl}_3$ )  $\delta$  ppm 6.98 - 7.02 (2H, m, Ar- $\text{H}_{2,6}$ ) 7.29 - 7.38 (3H, m, Ar- $\text{H}_{3,4,5}$ ) 8.04 (2H, dd,  $J = 8, 2$  Hz, Ar- $\text{H}_{2,6}$ ) 8.38 (2H, dd,  $J = 8, 2$  Hz, Ar- $\text{H}_{3,5}$ ).  $^{13}\text{C NMR}$  (75 MHz,  $\text{CDCl}_3$ )  $\delta$  ppm 122.1 ( $\text{C}_{2,6}$ ), 124.3 ( $\text{C}_{3,5}$ ), 127.7 ( $\text{C}_4$ ), 129.8 ( $\text{C}_{2,6}$ ), 129.9 ( $\text{C}_{3,5}$ ), 133.7, 141.0, 149.2.  $\nu_{\text{max}}(\text{ATR})$ : 1185, 1364, 1350, 1531, 1495, 1605  $\text{cm}^{-1}$ .

### Synthesis of 2'-nitro-[1,1'-biphenyl]-2-ol (26):<sup>6</sup>

The *title compound* was prepared by using general procedure using 2-(trimethylsilyl)phenyl-2'-nitrobenzenesulfonate (20).

Column chromatography (silica, 10% ether, petroleum ether) afforded the *title compound* as bright yellow solid (38.8 %; mp 141-143 °C; Lit<sup>8</sup> 142-144 °C). <sup>1</sup>H NMR (300 MHz, CDCl<sub>3</sub>) δ ppm 4.97 (1 H, br. s., OH), 6.85 (1 H, dd, J=8, 1 Hz, Ar-H<sub>3</sub>), 7.06 (1 H, td, J = 7.5, 1 Hz, Ar-H<sub>5</sub>), 7.22 - 7.34 (2H, m, Ar-H<sub>4,6</sub>), 7.46 (1H, dd, J = 8, 1.5 Hz, Ar-H<sub>6</sub>), 7.53 (1H, td, J = 8, 1.5 Hz, Ar-H<sub>5</sub>), 7.68 (1H, t, J = 8 Hz, Ar-H<sub>4</sub>), 7.99 (1H, dd, J = 8, 1 Hz, Ar-H<sub>3</sub>). <sup>13</sup>C NMR (75 MHz, CDCl<sub>3</sub>) δ ppm 115.4 (C<sub>4</sub>), 121.3 (C<sub>5</sub>), 124.6 (C<sub>5</sub>), 125.1 (C<sub>4</sub>), 128.9 (C<sub>3</sub>), 130.1 (C<sub>6</sub>), 132.4 (C<sub>3</sub>), 133.5 (C<sub>6</sub>), 149.2, 152.6. MS (ES<sup>+</sup>): [M + Na]<sup>+</sup> 238. MS (ES<sup>-</sup>): [M]<sup>-</sup> 214. Accurate Mass (ES<sup>-</sup>): [C<sub>12</sub>H<sub>9</sub>O<sub>3</sub>N<sub>1</sub>-<sup>1</sup>H]<sup>-</sup> requires 214.0509 found 214.0515. Microanalysis: C<sub>12</sub>H<sub>9</sub>N<sub>1</sub>O<sub>3</sub> requires C 66.9; H 4.2; N 6.5%. Found C 66.6; H 4.1; N 6.5%. ν<sub>max</sub>(ATR): 1336, 1450, 1513, 1591, 3470 cm<sup>-1</sup>

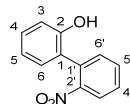

Table 1: Optimized reaction conditions for synthesis of bi-aryls (25), (26) and (15).

These bi-aryl forming reactions were optimised as follows:

| Reactant    | Reaction conditions                                          | %age Yield  |                 |
|-------------|--------------------------------------------------------------|-------------|-----------------|
|             |                                                              | biaryl (25) | disylation (31) |
| 19 (1.0 eq) | TBAF (1.1 eq), dry acetonitrile, rt, 16 h                    | 32%         | 36%             |
|             | TBAF (1.1 eq), furan (2 eq.), dry acetonitrile, rt, 16 h     | 33%         | 26.5%           |
|             | TBAF (2 eq), dry acetonitrile, rt, 16 h                      | 35%         | 27%             |
|             | TBAF (3 eq), furan (3 eq.), dry acetonitrile, rt, 16 h       | 43%         | 17%             |
|             | TBAF (3 eq), dry acetonitrile, rt, 16 h                      | 45%         | 19%             |
|             | TBAF (4 eq), dry acetonitrile, rt, 16 h                      | 42.5%       | 21%             |
|             | CsF (2 eq), dry acetonitrile, rt, 16 h                       | nr          | nr              |
|             | CsF (5 eq), dry acetonitrile, rt, 16 h                       | nr          | nr              |
|             | CsF (5 eq), dry acetonitrile, reflux, 16 h                   | nr          | nr              |
|             | TBAF (15% wt on alumina; 3 eq), , dry acetonitrile, rt, 16 h | nr          | nr              |
|             | TBAT (2 eq.), dry acetonitrile, rt, 16 h                     | nr          | nr              |
| 20 (1.0 eq) |                                                              | (26)        | (32)            |
|             | TBAF (1.1 eq), dry acetonitrile, rt, 16 h                    | 26%         | -               |
|             | TBAF (3 eq), dry acetonitrile, rt, 16 h                      | 38.8%       | -               |
|             | TBAF (3 eq), furan (3 eq.)dry acetonitrile, rt, 16 h         | 34.2%       | -               |
|             | CsF (2 eq), dry acetonitrile, rt, 16 h                       | nr          | nr              |
|             | CsF (5 eq), dry acetonitrile, rt, 16 h                       | nr          | nr              |
|             | CsF (5 eq), dry acetonitrile, reflux, 16 h                   | nr          | nr              |
| 12 (1.0 eq) |                                                              | (15)        |                 |
|             | TBAF (1 eq), furan (3 eq.)dry acetonitrile, rt, 16 h         | 53%         | -               |
|             | TBAF (2 eq), furan (3 eq.)dry acetonitrile, rt, 16 h         | 60%         | -               |
|             | TBAF (3 eq), furan (3 eq.)dry acetonitrile, rt, 16 h         | 66%         | -               |
|             | TBAF (3 eq),dry acetonitrile, rt, 16 h                       | 74%         | -               |

### Synthesis of 2',4'-dinitro-[1,1'-biphenyl]-2-ol (27):<sup>3b</sup>

The *title compound* was prepared by using general procedure using 2-(trimethylsilyl)phenyl-2'-nitrobenzenesulfonate (21).

Column chromatography (silica, 5% ether, petroleum ether) afforded the *title compound* as yellow solid (49 %). <sup>1</sup>H NMR (300 MHz, CDCl<sub>3</sub>) δ ppm 5.15 (1H, br. s., OH), 6.85 (1H, dd, J=8, 1 Hz, Ar-H<sub>3</sub>), 7.15 (1H, td, J = 7.5, 1 Hz, Ar-H<sub>5</sub>), 7.30 - 7.44 (2H, m, Ar-H<sub>4,6</sub>), 7.68 (H, d, J = 8, Ar-H<sub>6</sub>), 8.5 (1H, dd, J = 8, 2 Hz, Ar-H<sub>5</sub>), 8.85 (1H, d, J = 2 Hz, Ar-H<sub>3</sub>). ν<sub>max</sub>(ATR): 1346, 1528, 1607, 3465 cm<sup>-1</sup>

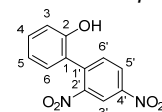

### 4-Chlorophenylbenzenesulfonate (33):<sup>7</sup>

The *title compound* was prepared by using general procedure using 2-(trimethylsilyl)phenyl-4'-chlorobenzenesulfonate (22).

Column chromatography (silica, 15% ether, petroleum ether) afforded the compound as white solid.(0.400 g, 74.6%; mp 97-98 °C). <sup>1</sup>H NMR (300 MHz, CDCl<sub>3</sub>) δ ppm 6.98 - 7.03 (2H, d, J = 7, Ar-H<sub>2,6</sub>) 7.28 - 7.34 (3H, m, Ar-H<sub>3,4,5</sub>) 7.52 (2H, d, J = 8 Hz, Ar-H<sub>3,5</sub>) 7.78 (2H, d, J = 8 Hz, Ar-H<sub>2,6</sub>). <sup>13</sup>C NMR (300 MHz, CDCl<sub>3</sub>) δ ppm 122.2 (C<sub>2,6</sub>), 127.3 (C<sub>3,5</sub>), 129.5 (C<sub>3,5</sub>), 129.7 (C<sub>4</sub>), 129.8 (C<sub>2,6</sub>), 133.8, 140.9, 149.4. ν<sub>max</sub>(ATR): 1377, 1397, 1455, 1585, 3057 cm<sup>-1</sup>. MS (EI<sup>+</sup>):[M<sup>+</sup>] 268. Accurate Mass (EI<sup>+</sup>): C<sub>12</sub>H<sub>9</sub>O<sub>3</sub><sup>35</sup>Cl<sub>1</sub>S<sub>1</sub> requires 267.9955 found 267.9951.

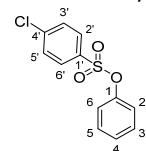

<sup>6</sup> J. H. Choi, B. C. Lee, H. W. Lee and I. Lee, *J. Org. Chem.* 2002, **67**, 1277.

<sup>7</sup> W. Cabri, S. D. Bernardinis, F. Francalanci, S. Penco, R. Santi, *J. Org. Chem.* 1990, **55**, 350.



### Phenyl benzenesulfonate (34):<sup>5</sup>

The *title compound* was prepared by using general procedure using 2-(trimethylsilyl)phenyl benzenesulfonate (23).

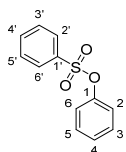

Column chromatography (silica, 15% ether : petroleum ether) afforded the *title compound* as an oil (0.410, 87.6%). <sup>1</sup>H NMR (300 MHz, CDCl<sub>3</sub>) δ ppm 7.01 (2H, dd, *J* = 8, 2 Hz, Ar-H<sub>2,6</sub>) 7.27 - 7.32 (4H, m, Ar-H<sub>3,5,3',5'</sub>) 7.54 (1H, t, *J* = 8 Hz, Ar-H<sub>4</sub>) 7.69 (1H, t, *J* = 7.5 Hz, Ar-H<sub>4</sub>) 7.85 (2H, d, *J* = 8 Hz, Ar-H<sub>2',6'</sub>). <sup>13</sup>C NMR (300 MHz, CDCl<sub>3</sub>) δ ppm 122.3(C<sub>2,6</sub>), 127.1(C<sub>4</sub>), 128.4(C<sub>2',6'</sub>), 129.0(C<sub>3',5'</sub>), 129.6 (C<sub>3,5</sub>), 134.1(C<sub>4'</sub>), 135.4, 149.6. MS (EI+): [M<sup>+</sup>] 234.1. Accurate Mass (EI+): C<sub>12</sub>H<sub>10</sub>O<sub>3</sub>S<sub>1</sub> requires 234.0345 found 234.0347.  $\nu_{\max}$ (ATR): 1197, 1371, 1448, 1487, 3067 cm<sup>-1</sup>.

### Phenyl naphthalene-1'-sulfonate (35):<sup>6</sup>

The *title compound* was prepared by using general procedure using 2-(trimethylsilyl)phenyl naphthalene-1-sulfonate (24).

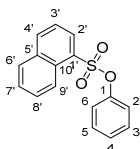

Column chromatography (silica, 15% ether, petroleum ether) afforded the *title compound* as white solid (0.285, 84%; mp 114-116 °C). <sup>1</sup>H NMR (300 MHz, CDCl<sub>3</sub>) δ ppm 6.85 - 6.90 (2H, m, Ar-H<sub>2,6</sub>) 7.17 - 7.20 (3H, m, Ar-H<sub>3,4,5</sub>) 7.47 (1H, t, *J* = 8 Hz, Ar-H<sub>8</sub>) 7.69 (1H, t, *J* = 7.5 Hz, Ar-H<sub>3</sub>) 7.80 (1H, t, *J* = 8 Hz, Ar-H<sub>7</sub>) 8.00 (1H, d, *J* = 8 Hz, Ar-H<sub>2'</sub>) 8.10 (1 H, dd, *J* = 7.5, 1 Hz, Ar-H<sub>6'</sub>) 8.14 (1 H, d, *J* = 8 Hz, Ar-H<sub>4'</sub>) 8.85 (1 H, d, *J* = 8.5 Hz, Ar-H<sub>9</sub>). <sup>13</sup>C NMR (75 MHz, CDCl<sub>3</sub>) δ ppm 122.0 (C<sub>2,6</sub>), 123.9 (C<sub>8</sub>), 125.1 (C<sub>9</sub>), 127.1 (C<sub>4</sub>), 127.3 (C<sub>3</sub>), 128.5 (C<sub>2</sub>), 128.9 (C<sub>7</sub>), 129 (C<sub>3,5</sub>), 129.5, 130.8 (C<sub>6</sub>), 131.2, 134, 135.6 (C<sub>4</sub>). MS (EI+): [M<sup>+</sup>] 284.1. Accurate Mass(+EI): C<sub>16</sub>H<sub>12</sub>O<sub>3</sub>S<sub>1</sub> requires 284.0502 found 284.050.  $\nu_{\max}$ (ATR): 1133, 1365, 1586, 1485, 3063 cm<sup>-1</sup>.

#### iv. Truce-Smith rearrangements – more highly functionalised substrates

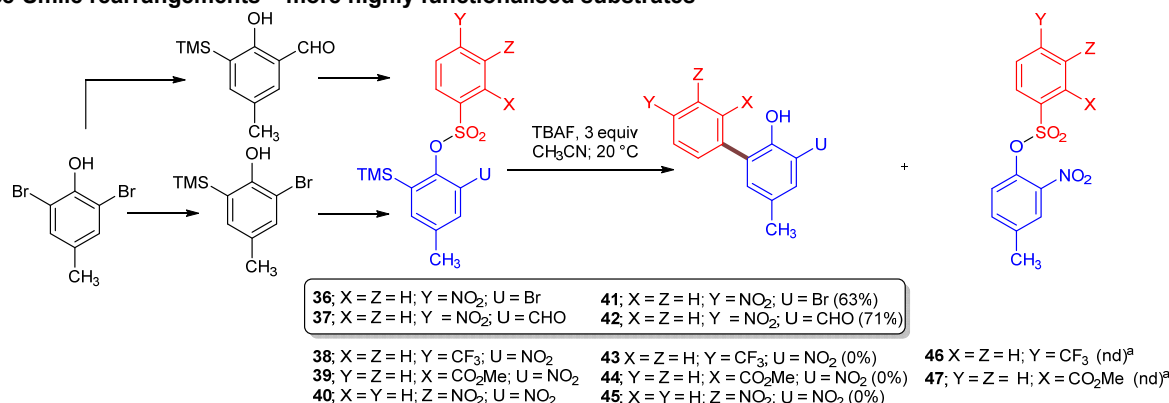

#### Synthesis of (2,6-dibromo-4-methylphenoxy)trimethylsilane:

The phenol (1.1 mmol, 1.1 eq.) was refluxed with 1,1,1,3,3,3-hexamethyldisilazane (3.3 mmol, 3 eq.) for 3 hours. After cooling down the reaction mixture was concentrated *in vacuo* to give pure *title compound* as a pale yellow oil. 97.8% yield. <sup>1</sup>H NMR (500 MHz, CDCl<sub>3</sub>) δ ppm 0.38 (9H, s, Si-CH<sub>3</sub>) 2.25 (3H, s, C-CH<sub>3</sub>) 7.29 (2H, s, Ar-H<sub>3,5</sub>). <sup>13</sup>C NMR (125 MHz, CDCl<sub>3</sub>) δ ppm 1.25 (Si-CH<sub>3</sub>), 19.9 (C-CH<sub>3</sub>), 115.6, 132.8 (C<sub>3,5</sub>), 133.3, 148.3. MS (EI+): [M<sup>+</sup>] 335.9, 337.8. Accurate Mass (+EI): C<sub>10</sub>H<sub>14</sub>O<sub>1</sub><sup>79</sup>Br<sub>2</sub>Si<sub>1</sub> requires 335.9175 found 335.9165.  $\nu_{\max}$ (ATR): 1534, 1580, 1604, 2962, 3401 cm<sup>-1</sup>.

#### Synthesis of 2-bromo-4-methyl-6-(trimethylsilyl)phenol:<sup>8</sup>

To the stirred solution of (2,6-dibromo-phenoxy)trimethylsilane (0.507 g, 1.5 mmol, 1 eq.) in THF (50 mL), *t*-Butyllithium (1.7 M in pentane, 3.53 mL, 6 mmol, 4 eq.) was added at -78 °C over 10 min. The reaction mixture was stirred for 2 hrs and upon recooling to -78 °C quenched with water. The reaction mixture was allowed to warm to room temperature and then poured into ether (50 mL) and washed with brine (3 x 50 mL). The organic layer was dried over MgSO<sub>4</sub> and concentrated *in vacuo*. The crude product was purified by column chromatography (silica; ether : petroleum ether 20 : 80) to afford the *title compound* as oil (0.29 g, 74.4 %). <sup>1</sup>H NMR (300 MHz, CDCl<sub>3</sub>) δ ppm 0.32 (9H, s, Si-CH<sub>3</sub>), 2.28 (3H, s, C-CH<sub>3</sub>), 5.56 (1H, s, OH), 7.10 (1H, s, Ar-H<sub>3</sub>), 7.30 (1H, s, Ar-H<sub>5</sub>). <sup>13</sup>C NMR (75 MHz, CDCl<sub>3</sub>) δ ppm -1.1 (Si-CH<sub>3</sub>), 20.2 (C-CH<sub>3</sub>), 110.0, 126.6, 130.9, 133.1 (C<sub>5</sub>), 135.1 (C<sub>3</sub>), 153.6.  $\nu_{\max}$ (ATR): 1268, 1301, 1386, 1417, 1650, 3101 cm<sup>-1</sup>.

#### Synthesis of 2-hydroxy-5-methyl-3-(trimethylsilyl)benzaldehyde:<sup>9</sup>

A solution of (2,6-dibromo-4-methylphenoxy)trimethylsilane (1.0 g, 3.0 mmol, 1 eq.) in dry THF (10 mL) was cooled to -78 °C and treated slowly with *t*-BuLi (7.6 mL, 12.0 mmol, 4 eq.) under nitrogen. At -78 °C stirred the reaction mixture for two hours and then at rt for one hour. Upon recooling the reaction mixture to -78 °C DMF (1.0 mL, 12 mmol, 4 eq.) was added all at once. The reaction mixture was stirred for 1 hour while warming to 0 °C and then quenched by adding saturated ammonium chloride (3 mL). The reaction mixture was allowed to room temperature and then extracted with ethyl acetate (2 x 15 mL). The organic phase was washed with water, brine, and dried over MgSO<sub>4</sub> and the reaction mixture taken to dryness *in vacuo*. The product obtained as light yellow colour solid which is used without further purification (0.504, 80.4%; mp 60-61 °C, Li<sup>9</sup> 61 °C). <sup>1</sup>H NMR (400 MHz, CDCl<sub>3</sub>) δ ppm 0.32 (9H, s, Si-CH<sub>3</sub>) 2.34 (3H, s, C-CH<sub>3</sub>) 7.33 (1H, d, *J* = 2 Hz, Ar-H<sub>4</sub>) 7.42 (1H, d, *J* = 2 Hz, Ar-H<sub>6</sub>) 9.84 (1H, s, CHO) 11.14 (1H, s, OH). <sup>13</sup>C NMR (125 MHz, CDCl<sub>3</sub>) δ ppm -0.96 (Si-CH<sub>3</sub>), 20.6 (C-CH<sub>3</sub>), 119.5, 128.8, 134.8 (C<sub>4</sub>), 144.0 (C<sub>6</sub>), 164.6, 192.1. MS (ES-): [M<sup>-</sup>] 207.06. Accurate Mass (EI-): C<sub>11</sub>H<sub>16</sub>O<sub>2</sub>Si<sub>1</sub><sup>-1</sup>H requires 207.0840 found 207.0841. Microanalysis: C<sub>11</sub>H<sub>16</sub>O<sub>2</sub>Si<sub>1</sub> requires C 63.4; H 7.7%. Found C 63.2; H 7.7%.  $\nu_{\max}$ (ATR): 3147, 2946, 2831, 2739, 1640, 1619, 1586, 1400, 1319, cm<sup>-1</sup>.

Sulfonate esters (36)-(40) were prepared using the general method as described above.

#### 2-Bromo-4-methyl-6-(trimethylsilyl)phenyl-4'-nitrobenzenesulfonate (36):

Column chromatography (silica, 10% ether, Petrol) afforded the compound as oil (1.18 g, 89 %). <sup>1</sup>H NMR (300 MHz, CDCl<sub>3</sub>) δ ppm 0.45 (9H, s, Si-CH<sub>3</sub>) 2.34 (3H, s, C-CH<sub>3</sub>) 7.29 (1H, s, Ar-H<sub>3</sub>) 7.31 (1H, s, Ar-H<sub>5</sub>) 8.15 (2H, d, *J* = 8 Hz, Ar-H<sub>2,6</sub>) 8.40 (2H, d, *J* = 8 Hz, Ar-H<sub>3',5'</sub>). <sup>13</sup>C NMR (75 MHz, CDCl<sub>3</sub>) δ ppm 0.26 (Si-CH<sub>3</sub>), 20.5 (C-CH<sub>3</sub>), 116.3, 124.1 (C<sub>3',5'</sub>), 130.1 (C<sub>2',6'</sub>), 135.4 (C<sub>3</sub>), 136.3, 138.1, 138.5, 142.8 (C<sub>5</sub>), 148.1, 150.9. MS (ES+): [M+Na]<sup>+</sup> 466. Accurate Mass (ES+): C<sub>16</sub>H<sub>18</sub>O<sub>5</sub><sup>79</sup>Br<sub>1</sub>S<sub>1</sub>Si<sub>1</sub>Na<sub>1</sub> requires 465.9777 found 465.8956.  $\nu_{\max}$ (ATR): 1233, 1369, 1501, 1574, 1599, 3012 cm<sup>-1</sup>.

#### 2-Formyl-2-6-(trimethylsilyl)phenyl-4'-nitrobenzenesulfonate (37):

Column chromatography (silica, 10% ether, Petrol) afforded the compound as yellow solid (1.0 g, 77 %, mp 107-109 °C). <sup>1</sup>H NMR (300 MHz, CDCl<sub>3</sub>) δ ppm 0.41 (9H, s, Si-CH<sub>3</sub>) 2.43 (3H, s, CH<sub>3</sub>) 7.60 (1H, s, Ar-H<sub>5</sub>) 7.62 (1H, s, Ar-H<sub>3</sub>) 8.08 (2H, d, *J* = 9 Hz, Ar-H<sub>2',6'</sub>) 8.43 (2H, d, *J* = 9 Hz, Ar-H<sub>3',5'</sub>) 9.67 (s, 1H, CHO). <sup>13</sup>C NMR (75 MHz, CDCl<sub>3</sub>) δ ppm -0.25 (Si-CH<sub>3</sub>), 20.36 (CH<sub>3</sub>), 124.2 (C<sub>3',5'</sub>), 129.6 (C<sub>2',6'</sub>), 130.4 (C<sub>3</sub>), 130.8, 136.9, 137.8, 140.2, 142.8 (C<sub>5</sub>), 151.1, 151.6, 186.7. MS (ES+): [M+Na]<sup>+</sup> 416.4; [M+NH<sub>4</sub>]<sup>+</sup> 411.1. Accurate Mass (ESI+): [C<sub>17</sub>H<sub>19</sub>O<sub>6</sub>S<sub>1</sub>Si<sub>1</sub>N<sub>1</sub> + NH<sub>4</sub>]<sup>+</sup> requires 411.1046 found 411.1040.  $\nu_{\max}$ (ATR): 1161, 1237, 1460, 1585, 1681, 2829 cm<sup>-1</sup>.

<sup>8</sup> F. i. Carroll, T. P. Robinson, L. E. Brieady, R. N. Atkinson, S. Wayne, M. I. Damaj, B. R. Martin and H. A. Navarro, *J. Med. Chem.*, 2007, **50**, 6383.

<sup>9</sup> A. N. Thandi, Y. Huang and V. H. Rawal, *Org. Lett.* 2007, **9**, 3873.

### 2-Nitro-4-methyl-6-(trimethylsilyl)phenyl-4'-(trifluoromethyl)benzenesulfonate (38):

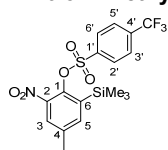

Column chromatography (silica, 10% ether, Petrol) afforded the compound as oil (1.25 g, 85 %).  $^1\text{H NMR}$  (300 MHz,  $\text{CDCl}_3$ )  $\delta$  ppm 0.43 (9H, s, Si-CH<sub>3</sub>) 2.45 (3H, s, CH<sub>3</sub>) 7.56 (1H, dd,  $J$  = 1.5, 0.75 Hz, Ar-H<sub>5</sub>) 7.67 (1H, s, Ar-H<sub>3</sub>) 7.88 (2H, d,  $J$  = 8 Hz, Ar-H<sub>2,6</sub>) 8.11 (2H, d,  $J$  = 8 Hz, Ar-H<sub>3,5</sub>).  $^{13}\text{C NMR}$  (300 MHz,  $\text{CDCl}_3$ )  $\delta$  ppm 0.06 (Si-CH<sub>3</sub>), 20.7 (C-CH<sub>3</sub>), 126.5, 126.6 (C<sub>3</sub>), 126.9 (C<sub>2,6</sub>), 127.0, 129.2 (C<sub>3,5</sub>), 138.1, 140.9, 141.1 (C<sub>5</sub>), 143.7, 144.4. **MS** (ES+): [M<sup>+</sup>] 455.9. **Accurate Mass**(+ESI): C<sub>17</sub>H<sub>18</sub>O<sub>5</sub>S<sub>1</sub>Si<sub>1</sub>N<sub>1</sub><sup>19</sup>F<sub>3</sub>Na<sub>1</sub> requires 456.0519 found 456.0508.  $\nu_{\text{max}}$ (ATR): 1130, 1234, 1257, 1307, 1569, 1581, 1601, 2921 cm<sup>-1</sup>.

### Methyl 2-((4-methyl-2-nitro-6-(trimethylsilyl)phenoxy)sulfonyl)benzoate (39):

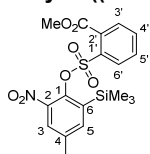

Column chromatography (silica, 10% ether, Petrol) afforded the compound as oil (1.05 g, 80 %).  $^1\text{H NMR}$  (300 MHz,  $\text{CDCl}_3$ )  $\delta$  ppm 0.42 (9H, s, Si-CH<sub>3</sub>) 2.43 (3H, s, C-CH<sub>3</sub>) 3.85 (3H, s, OCH<sub>3</sub>) 7.54 (1H, d,  $J$  = 2 Hz, Ar-H<sub>5</sub>) 7.58 (1H, d,  $J$  = 2 Hz, Ar-H<sub>3</sub>) 7.64 - 7.80 (3H, m, Ar-H<sub>4,5,6</sub>) 7.99 (1H, dd,  $J$  = 8, 0.75 Hz, Ar-H<sub>3</sub>).  $^{13}\text{C NMR}$  (75 MHz,  $\text{CDCl}_3$ )  $\delta$  ppm -0.07 (Si-CH<sub>3</sub>), 20.7 (C-CH<sub>3</sub>), 53.2 (OCH<sub>3</sub>), 126.7 (C<sub>3</sub>), 127.1, 129.7, 130.0 (C<sub>3</sub>), 131.1, 133.3, 134.3, 137.6, 139.4, 139.3, 140.8 (C<sub>5</sub>), 142.8, 143.6, 166.6. **MS** (ES+): [M<sup>+</sup>] 445.9. **Accurate Mass**(+ESI): C<sub>18</sub>H<sub>21</sub>O<sub>7</sub>S<sub>1</sub>Si<sub>1</sub>N<sub>1</sub>Na<sub>1</sub> requires 446.0757 found 446.0689.  $\nu_{\text{max}}$ (ATR): 1131, 1230, 1470, 1595, 1701, 2835 cm<sup>-1</sup>.

### 4-Methyl-2-nitro-6-(trimethylsilyl)phenyl 3-nitrobenzenesulfonate (40):

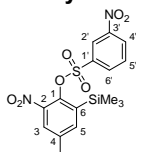

Column chromatography (silica, 10% ether, Petrol) afforded the compound as oil (1.1 g, 83 %).  $^1\text{H NMR}$  (300 MHz,  $\text{CDCl}_3$ )  $\delta$  ppm 0.45 (9H, s, Si-CH<sub>3</sub>) 2.45 (3H, s, C-CH<sub>3</sub>) 7.57 (1H, d,  $J$  = 2 Hz, Ar-H<sub>5</sub>) 7.64 (1H, d,  $J$  = 2 Hz, Ar-H<sub>3</sub>) 7.85 (1H, t, Ar-H<sub>5</sub>) 8.30 (1H, dd,  $J$  = 8, 1.5 Hz, Ar-H<sub>6</sub>) 8.60 (1H, dd,  $J$  = 8, 1.5 Hz, Ar-H<sub>4</sub>) 8.76 (1H, t,  $J$  = 2 Hz, Ar-H<sub>2</sub>).  $^{13}\text{C NMR}$  (75 MHz,  $\text{CDCl}_3$ )  $\delta$  ppm -0.08 (Si-CH<sub>3</sub>), 20.7 (C-CH<sub>3</sub>), 126.9 (C<sub>3</sub>), 129.1 (C<sub>2</sub>), 130.9, 133.9 (C<sub>4</sub>), 137.5 (C<sub>5</sub>), 138.3 (C<sub>6</sub>), 139.2, 141.1, 141.2 (C<sub>5</sub>), 143.4, 148.2.

### General method for synthesis of bi-aryls:

To a stirred solution of the sulfonate ester compound (1 eq.) and furan (3 eq.) in dry acetonitrile (12 mL), Tetrabutylammonium fluoroide (1 M, 3 eq.) was added slowly. The reaction mixture was stirred at rt for sixteen hours and then poured into ether. The resulting mixture was washed with dilute HCl (3 N, 10 mL) and then with water (2 x 10 mL), dried over MgSO<sub>4</sub> and the reaction mixture taken to dryness *in vacuo*. Column chromatography (silica, ether : petrol) afforded the *pure compound*.

### Synthesis of 3-bromo-5-methyl-4'-nitro-[1,1'-biphenyl]-2-ol (41):

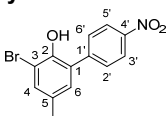

Column chromatography (silica, 10% ether, petroleum ether) afforded the compound as bright yellow solid (0.401 g, 63 % ; mp 177-179 C°).  $^1\text{H NMR}$  (300 MHz,  $\text{CDCl}_3$ )  $\delta$  ppm 2.34 (3H, s, CH<sub>3</sub>) 5.65 (1H, s, OH) 7.10 (1H, d,  $J$  = 1.5 Hz, Ar-H<sub>6</sub>) 7.36 (1H, d,  $J$  = 1.5 Hz, Ar-H<sub>4</sub>) 7.73 (2H, d,  $J$  = 8.5 Hz, Ar-H<sub>2,6</sub>) 8.27 (2H, d,  $J$  = 8.5 Hz, Ar-H<sub>3,5</sub>).  $^{13}\text{C NMR}$  (75 MHz,  $\text{CDCl}_3$ )  $\delta$  ppm 20.2 (CH<sub>3</sub>), 111.3, 123.4 (C<sub>3,5</sub>), 126.7 (C<sub>4</sub>), 130.0 (C<sub>2,6</sub>), 130.1, 131.6, 132.6, 144.3 (C<sub>6</sub>), 146.9, 147.0. **MS** (ES-): [M] 306.0. **Accurate Mass** (ESI-): C<sub>13</sub>H<sub>9</sub>O<sub>3</sub>N<sub>1</sub><sup>79</sup>Br<sub>1</sub><sup>1</sup>H requires 305.9771

found 305.9760. **Microanalysis**: C<sub>13</sub>H<sub>10</sub>N<sub>2</sub>O<sub>3</sub>Br requires C 50.7; H 3.3; N 4.5%. Found C 50.7; H 3.5; N 4.5%.  $\nu_{\text{max}}$ (ATR): 1237, 1348, 1468, 1514, 1573 cm<sup>-1</sup>.

### Synthesis of 2-hydroxy-5-methyl-4'-nitro-[1,1'-biphenyl]-3-carbaldehyde (42):

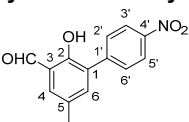

Column chromatography (silica, 10% ether, petroleum ether) afforded the compound as bright yellow solid (0.364 g, 71 % ; mp 167-169 C°).  $^1\text{H NMR}$  (300 MHz,  $\text{CDCl}_3$ )  $\delta$  ppm 2.43 (3H, s, CH<sub>3</sub>) 7.43 - 7.48 (2H, m, Ar-H<sub>4,6</sub>) 7.78 (2H, d,  $J$  = 8.5 Hz, Ar-H<sub>2,6</sub>) 8.29 (2H, d,  $J$  = 8.5 Hz, Ar-H<sub>3,5</sub>) 9.94 (1H, s, CHO) 11.47 (1H, s, OH).  $^{13}\text{C NMR}$  (300 MHz,  $\text{CDCl}_3$ )  $\delta$  ppm 20.3 (CH<sub>3</sub>), 120.8, 123.4 (C<sub>3,5</sub>), 127.7 (C<sub>4</sub>), 129.5 (C<sub>2,6</sub>), 130.1, 134.4, 138.5, 143.2 (C<sub>6</sub>), 147.1, 156.7, 196.7 (CHO). **MS** (ES-): [M] 256.0. **Accurate Mass** (ESI-): C<sub>14</sub>H<sub>10</sub>O<sub>4</sub>N<sub>1</sub> requires 256.0615 found 256.0604.  $\nu_{\text{max}}$ (ATR): 1245, 1334, 1376, 1530, 1544, 1597, 1650, 2961, 3112 cm<sup>-1</sup>.

The following protodesilylated products compounds were isolated/observed from failed Truce-Smith rearrangements.

### 4-Methyl-2-nitrophenyl 4'-(trifluoromethyl)benzenesulfonate (46):

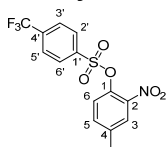

$^1\text{H NMR}$  (300 MHz,  $\text{CDCl}_3$ )  $\delta$  ppm (**crude**) 2.33 (3H, s, CH<sub>3</sub>) 7.08 (1H, d,  $J$  = 8.5 Hz, Ar-H<sub>6</sub>) 7.38 (1H, dd,  $J$  = 8.5, 2 Hz, Ar-H<sub>5</sub>) 7.57 (2H, d,  $J$  = 8 Hz, Ar-H<sub>2,6</sub>) 7.87 (1H, s, Ar-H<sub>3</sub>) 8.02 (2H, d,  $J$  = 8 Hz, Ar-H<sub>3,5</sub>).

### 4-Methyl-2-nitrophenyl 3'-nitrobenzenesulfonate:

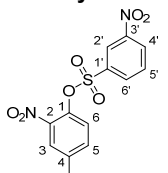

$^1\text{H NMR}$  (300 MHz,  $\text{CDCl}_3$ )  $\delta$  ppm (**crude**) 2.39 (3H, s, CH<sub>3</sub>) 7.10 (1H, d,  $J$  = 8.5 Hz, Ar-H<sub>6</sub>) 7.44 (1H, dd,  $J$  = 8.5, 2 Hz, Ar-H<sub>5</sub>) 7.56 (1H, t,  $J$  = 8 Hz, Ar-H<sub>5</sub>) 7.94 (1H, s, Ar-H<sub>3</sub>) 8.22 (1H, d,  $J$  = 9 Hz, Ar-H<sub>6</sub>) 8.33 (1H, d,  $J$  = 8 Hz, Ar-H<sub>D</sub>) 8.79 (1H, t,  $J$  = 2 Hz, Ar-H<sub>2</sub>).

### Methyl 2-((4-methyl-2-nitrophenoxy)sulfonyl)benzoate (47):

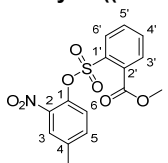

$^1\text{H NMR}$  (300 MHz,  $\text{CDCl}_3$ )  $\delta$  ppm (**crude**) 2.34 (3H, s, C-CH<sub>3</sub>) 3.90 (3H, s, O-CH<sub>3</sub>) 7.06 (1H, d,  $J$  = 8.5 Hz, Ar-H<sub>6</sub>) 7.30 - 7.44 (4H, m, Ar-H<sub>5,4,5,6</sub>) 7.89 (1H, s, Ar-H<sub>3</sub>) 8.05 (1H, d,  $J$  = 8 Hz, Ar-H<sub>3</sub>).

## v. Synthesis of dibenzofuran, (48)

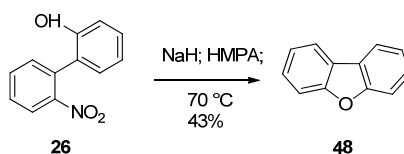

### Synthesis of Dibenzofuran (48):<sup>10</sup>

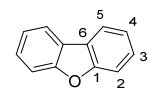

A solution of 2'-nitro-[1,1'-biphenyl]-2-ol, (**26**), (0.215 g, 1.0 mmol) in hexamethylphosphoric triamide (1.5 mL) was added to a stirred solution of sodium hydride (0.072 g, 3.0 mmol) in hexamethylphosphoric triamide (2.0 mL). The reaction mixture was heated at 70 °C for 24 hrs and then allowed to cool to room temperature. 5% HCl was added to the reaction mixture and then extracted with diethyl ether. The organic layer was dried and concentrated *in vacuo*. The crude product was purified by column chromatography (20:80 ether-petroleum ether) afforded the *title compound*, (**48**), as white powder (43%; mp 80-81 °C Lit<sup>10</sup> mp 83.5). <sup>1</sup>H NMR (400 MHz, CDCl<sub>3</sub>) δ ppm 7.37 (2H, td, *J* = 8, 1 Hz, Ar-H<sub>4</sub>) 7.49 (2H, td, *J* = 8, 1 Hz, Ar-H<sub>3</sub>) 7.61 (2H, d, *J* = 8 Hz, Ar-H<sub>2</sub>) 7.99 (2H, dd, *J* = 7.5, 0.76 Hz, Ar-H<sub>5</sub>). <sup>13</sup>C NMR (125 MHz, CDCl<sub>3</sub>) δ ppm 111.6 (C<sub>2</sub>), 120.6 (C<sub>5</sub>), 122.6 (C<sub>4</sub>), 124.2 (C<sub>3</sub>), 127.1, 156.2.

<sup>10</sup> A. F. Sierakowski, *Aust. J. Chem.* 1983, **36**, 1281.

## vi. Synthesis of pyridones

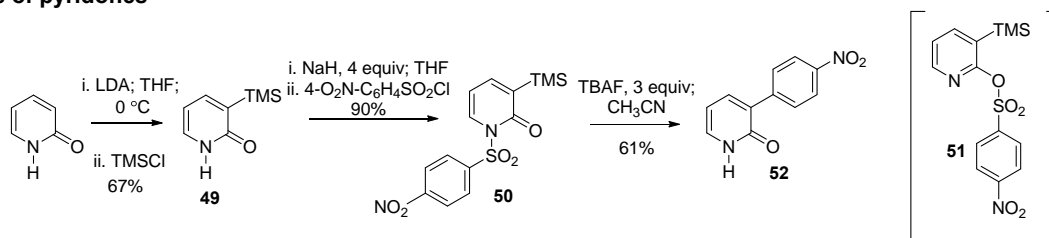

### Synthesis of 3-(trimethylsilyl)-2-hydroxypyridine (**49**):<sup>11</sup>

To a stirred solution of 2-hydroxypyridine (10 g, 105 mmol) in THF (250 mL) at 0 °C was added Lithium diisopropylamide (2 M, 115 mL, 231 mmol) over 15 min under nitrogen. The solution was stirred at 0 °C for 15 min and for 1 hour while warming to room temperature. Upon recooling to 0 °C chlorotrimethylsilane (15 mL, 115 mmol) was added dropwise to the reaction mixture. The solution was allowed to stir overnight at room temperature. The THF was evaporated and extracted with ethyl acetate. The organic phase was washed with water, brine, and dried over MgSO<sub>4</sub> and the reaction mixture taken to dryness *in vacuo*. The product obtained as off-white solid (11.8 g, 67%; **mp** 93-94 °C; Lit<sup>11</sup> 91-92 °C) after flash chromatography (ethyl acetate). <sup>1</sup>H NMR (400 MHz, CDCl<sub>3</sub>) δ ppm 0.28 (9H, s, CH<sub>3</sub>) 6.24 (1H, t, *J* = 6.5 Hz, Ar-H<sub>5</sub>) 7.37 (1H, dd, *J* = 6.5, 2 Hz, Ar-H<sub>4</sub>) 7.55 (1H, dd, *J* = 6.5, 2 Hz, Ar-H<sub>6</sub>) 12.90 (1 H, br. s., OH). <sup>13</sup>C NMR (125 MHz, CDCl<sub>3</sub>) δ ppm -1.55(Si-CH<sub>3</sub>), 106.9 (C<sub>5</sub>), 131.8 (C<sub>6</sub>), 135.8 (C<sub>4</sub>), 147.6, 168.0. **MS** (ES<sup>+</sup>): [M+Na]<sup>+</sup> 190.4. **Accurate Mass** (ES<sup>+</sup>): C<sub>8</sub>H<sub>13</sub>N<sub>1</sub>O<sub>1</sub>Si<sub>1</sub>Na<sub>1</sub> requires 190.664 found 190.0670. **ν**<sub>max</sub>(ATR): 1241, 1429, 1465, 1536, 1616, 2951 cm<sup>-1</sup>.

### Synthesis of 3-(trimethylsilyl)pyridin-2-yl-4-nitrobenzenesulfonate (**50**):

The *title compound* was prepared by using general procedure as above. 4-nitrobenzenesulfonylchloride (0.728 g, 3.31 mmol, 1.1 eq) was added to the reaction mixture of 3-(trimethylsilyl)pyridine-2-ol (0.505 g, 3.01 mmol, 1 eq.) and sodium hydride (0.288 g, 12.04 mmol) in THF (50 mL). Column chromatography (silica, 10% ether, Petrol) afforded the compound as yellow crystalline solid (1.05 g, 90 %; **mp** 164-166 °C). <sup>1</sup>H NMR (400 MHz, CDCl<sub>3</sub>) δ ppm 0.16 (9H, s, CH<sub>3</sub>) 6.28 - 6.32 (1H, m, Ar-H<sub>5</sub>) 7.45 (1H, dd, *J* = 6, 2 Hz, Ar-H<sub>6</sub>) 8.04 (1 H, dd, *J* = 7.57, 2.02 Hz, Ar-H<sub>4</sub>) 8.30 (2H, d, *J* = 9 Hz, Ar-H<sub>2,6</sub>) 8.39 (2H, d, *J* = 9 Hz, Ar-H<sub>3,5</sub>). <sup>13</sup>C NMR (125 MHz, CDCl<sub>3</sub>) δ ppm -1.98 (CH<sub>3</sub>), 107.3 (C<sub>5</sub>), 123.9 (C<sub>3,5</sub>), 131.0 (C<sub>2,6</sub>), 132.0 (C<sub>4</sub>), 136.4, 142.5, 147.8, 150.9 (C<sub>6</sub>), 162.1. **MS** (EI<sup>+</sup>): [M<sup>+</sup>] 353.4. **Accurate Mass** (ES<sup>+</sup>): C<sub>14</sub>H<sub>16</sub>O<sub>5</sub>S<sub>1</sub>Si<sub>1</sub>N<sub>2</sub>Na<sub>1</sub> requires 375.0447 found 375.0431 **Microanalysis**: C<sub>14</sub>H<sub>16</sub>O<sub>5</sub>S<sub>1</sub>Si<sub>1</sub>N<sub>2</sub> requires C 47.7; H 4.6; N 7.9; S 9.1%. Found C 47.5; H 4.6; N 7.7; S 8.9%. **ν**<sub>max</sub>(ATR): 1162, 1334, 1367, 1530, 1600, 1656, 2953 cm<sup>-1</sup>.

### Synthesis of 3-(4-nitrophenyl)pyridin-2(1H)-one (**52**):<sup>12</sup>

Following the general method for bi-aryl synthesis, column chromatography (silica, 15% ether, petroleum ether) of the reaction between (**50**) and TBAF afforded the compound as bright yellow solid (0.266 g, 61.4%; **mp** 187-189 °C). <sup>1</sup>H NMR (400 MHz, DMSO-*d*<sub>6</sub>) δ ppm 6.35 - 6.40 (1H, m, Ar-H<sub>5</sub>) 7.52 (1H, dd, *J* = 6.5, 2 Hz, Ar-H<sub>4</sub>) 7.87 (1H, dd, *J* = 7, 2 Hz, Ar-H<sub>6</sub>) 8.07 (2H, d, *J* = 9 Hz, Ar-H<sub>2,6</sub>) 8.24 (2H, d, *J* = 9 Hz, Ar-H<sub>3,5</sub>) 12.06 (1H, br. s.). <sup>13</sup>C NMR (75 MHz, DMSO-*d*<sub>6</sub>) δ ppm 105.6 (C<sub>5</sub>), 123.1 (C<sub>3,5</sub>), 127.2, 128.9 (C<sub>2,6</sub>), 136.7 (C<sub>5</sub>), 140.6 (C<sub>6</sub>), 143.4, 146.1, 160.8 (C<sub>2</sub>). **MS** (ES<sup>+</sup>): [M<sup>+</sup>] 217.4; **Accurate Mass** (ES<sup>+</sup>): C<sub>11</sub>H<sub>9</sub>N<sub>2</sub>O<sub>3</sub> requires 217.0613 found 217.0628. **ν**<sub>max</sub>(ATR): 1247, 1328, 1499, 1556, 1591, 1658, 2792 cm<sup>-1</sup>.

<sup>11</sup> F.I. Carroll, T. P. Robinson, L. E. Brieady, R. N. Atkinson, S. Wayne, M. I. Damaj, B.R. Martin and H. A. Navarro, *J. Med. Chem.* 2007, **50**, 6383.

<sup>12</sup> J. Witherington, V. Bordas, A. Gaiba, A. Naylor, N. Parr, D. G. Smith, A. K. Takle and R. W. Ward, *Bioorg and Med. Chem. Lett.* 2006, **16**, 2256.

vii. Attempted halogen metal exchange reactions on (53) and (54).

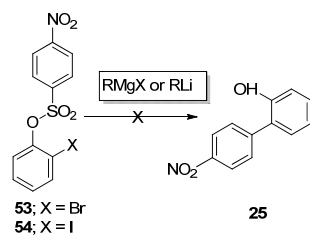

**Synthesis of 2-bromophenyl 4'-nitrobenzenesulfonate (53)**<sup>13</sup>

2-bromophenol (1.5 g, 8.67 mmol) was added to a stirred suspension of sodium hydride (0.550 g, 17.34 mmol) in dry THF (15 mL). After 40 minutes 4-nitrobenzenesulphonylchloride (2.114 g, 9.55 mmol) was slowly added in dry THF (13 mL). the reaction mixture was stirred at room temperature for two hours. After this reaction mixture was poured into ether (50 mL) and washed with water. The organic layer was dried and concentrated *in vacuo*. The crude product was purified by recrystallisation (petroleum ether) afforded the *title compound* as brown solid (2.055 g, 76%). <sup>1</sup>H NMR (400 MHz,  $\text{CDCl}_3$ )  $\delta$  ppm 7.03 - 7.07 (1H, m) 7.40 - 7.43 (2H, m) 7.78 (1 H, d,  $J=8.07$  Hz) 8.14 (2 H, dd,  $J=8.83, 1.77$  Hz) 8.40 (2 H, dd,  $J=8.83, 2.02$  Hz).  $\nu_{\text{max}}(\text{ATR})$ : 1390, 1534, 1608, 3109  $\text{cm}^{-1}$ .

**Synthesis of 2-iodophenyl 4'-nitrobenzenesulfonate (54)**<sup>3b</sup>

2-iodophenol (1.89 g, 8.67 mmol) was added to a stirred suspension of sodium hydride (0.550 g, 17.34 mmol) in dry THF (15 mL). After 40 minutes 4-nitrobenzenesulphonylchloride (2.114 g, 9.55 mmol) was slowly added in dry THF (13 mL). the reaction mixture was stirred at room temperature for two hours. After this reaction mixture was poured into ether (50 mL) and washed with water. The organic layer was dried and concentrated *in vacuo*. The crude product was purified by recrystallisation (petroleum ether) afforded the *title compound* as brown solid (1.141 g, 82%).

<sup>1</sup>H NMR (400 MHz,  $\text{CDCl}_3$ )  $\delta$  ppm 6.99 - 7.09 (1H, m) 7.38 - 7.45 (2H, m) 7.78 (1H, d,  $J = 7.3$  Hz, Ar- $\text{H}_3$ ) 8.14 (2H, dd,  $J = 8.8, 2.2$  Hz, Ar- $\text{H}_2$ ) 8.40 (2H, dd,  $J = 8.8, 2.2$  Hz, Ar- $\text{H}_3$ ). <sup>13</sup>C NMR (125 MHz,  $\text{CDCl}_3$ )  $\delta$  ppm 89.5, 123.2, 124.3, 129.0, 129.9, 130.3, 140.3, 141.3, 149.5, 151.2.  $\nu_{\text{max}}(\text{ATR})$ : 1394, 1578, 1615, 3106  $\text{cm}^{-1}$ .

**Attempted Truce Smiles reactions using (53) and (54).**

Reaction of either 2-iodophenyl 4'-nitrobenzenesulfonate or 2-bromophenyl 4'-nitrobenzenesulfonate with PhLi (2 eq.) or *iso*-propylmagnesium chloride (1.5 eq. 2M THF solution) at -78 °C in THF, under an atmosphere of nitrogen, for 1 hour afforded none of the desired rearranged products as judged by an examination of the <sup>1</sup>H NMR spectra of the crude reaction mixtures.

---

## **Part B: Spectroscopic data**

---

**Compound 5a:**

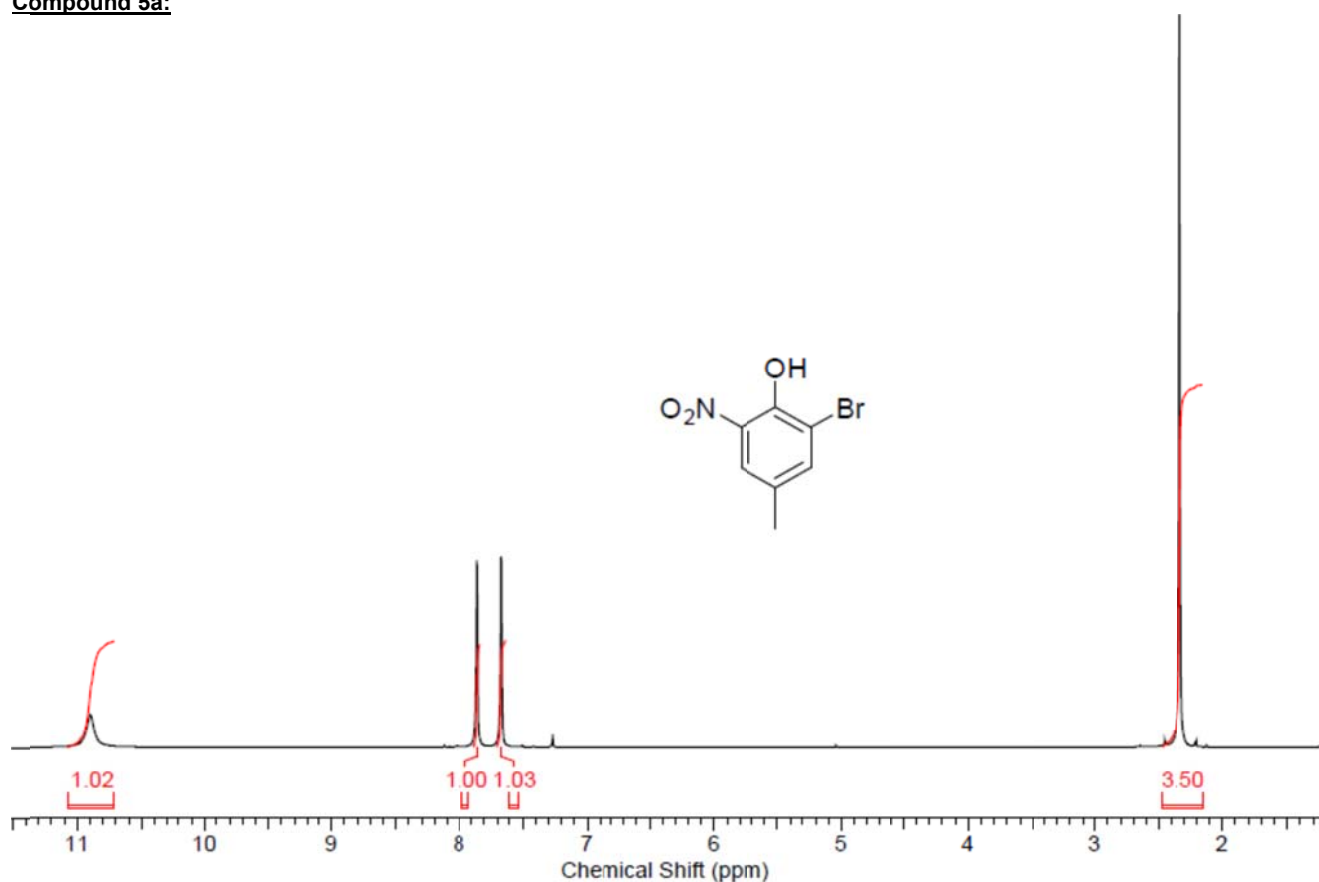

2-BROMO-6-NITRO-4-METHYLPHENOL.013.001.1R.esp

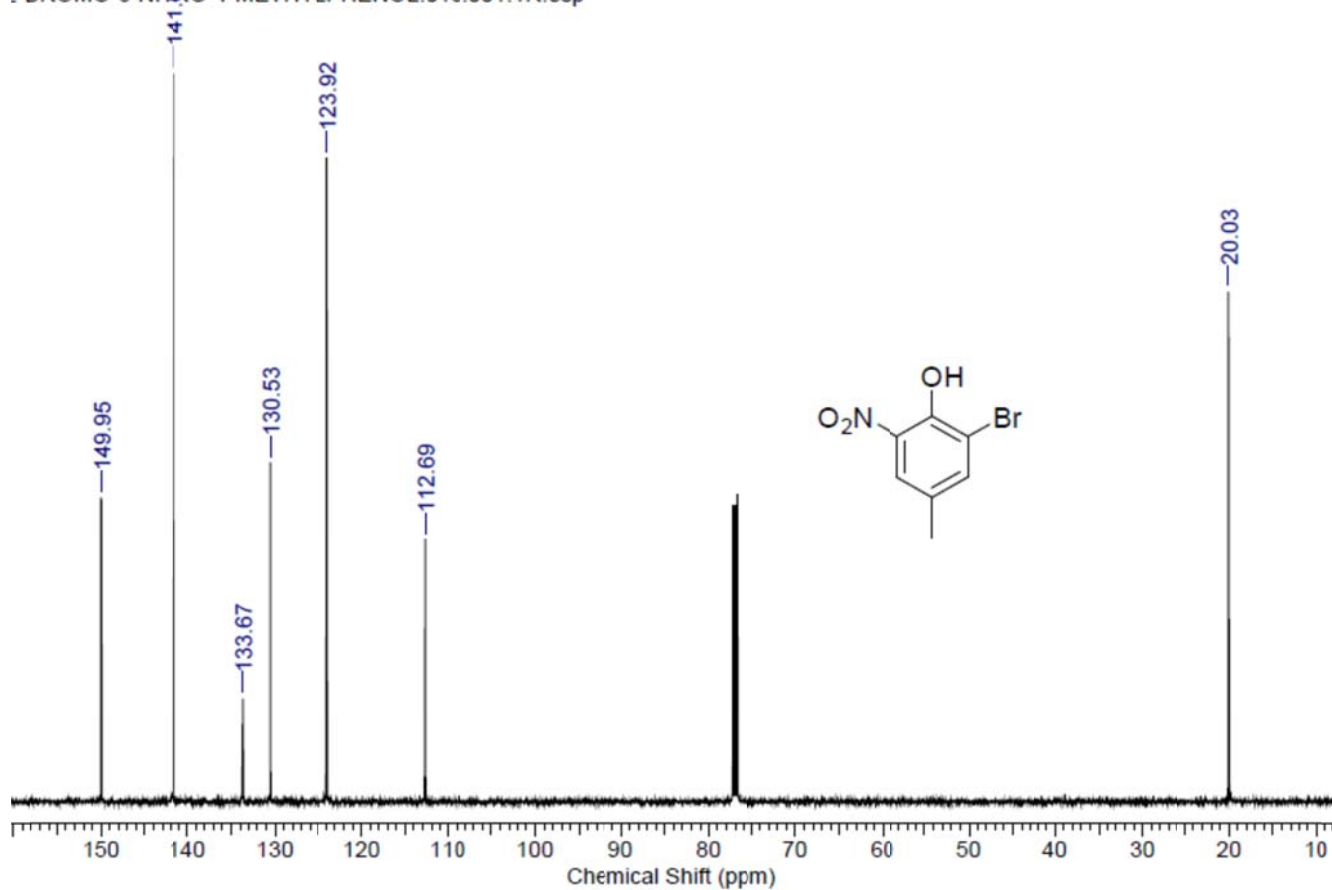



**Precursors for Scheme 2:**

1-BROMOSILYLPHENOL ETHER.010.001.1R.esp

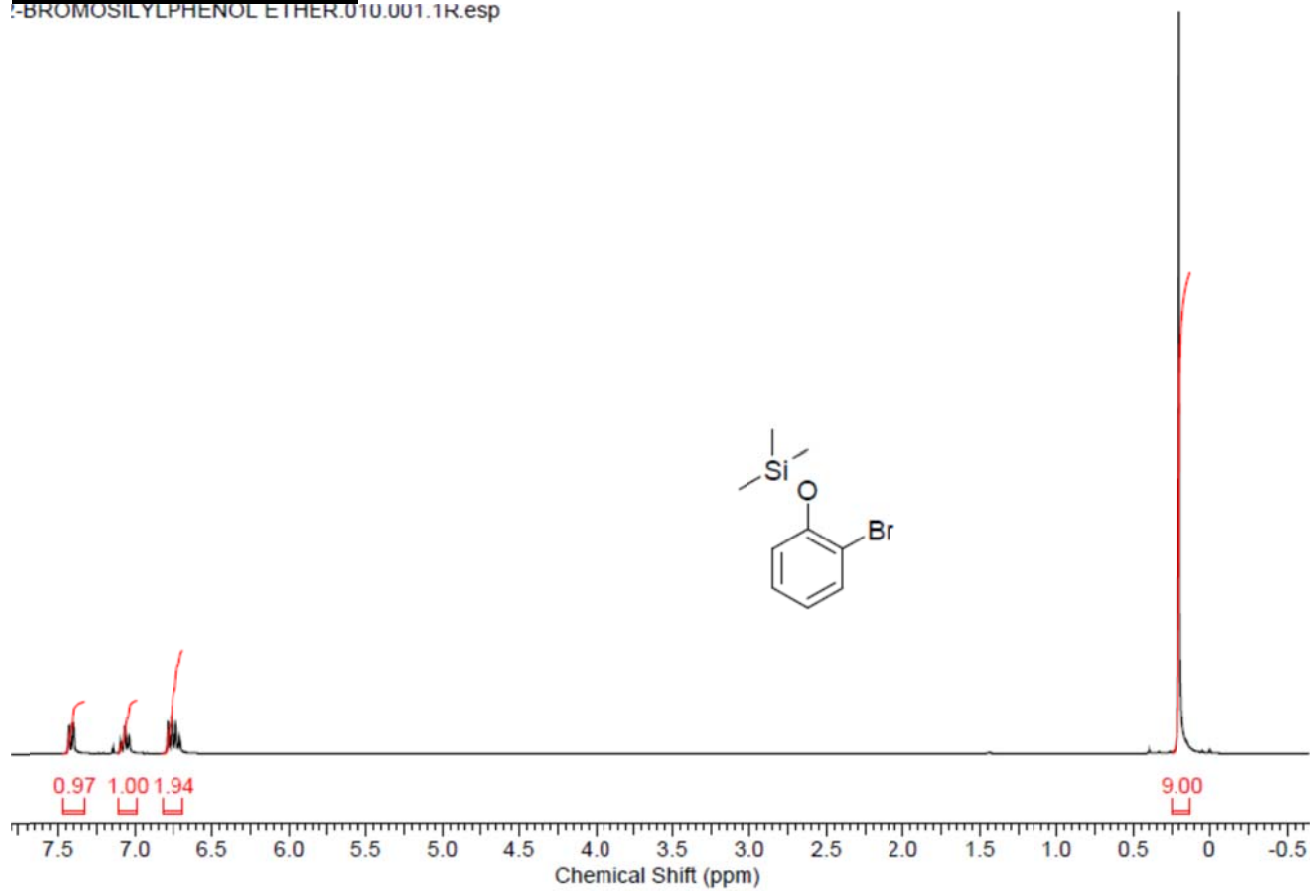

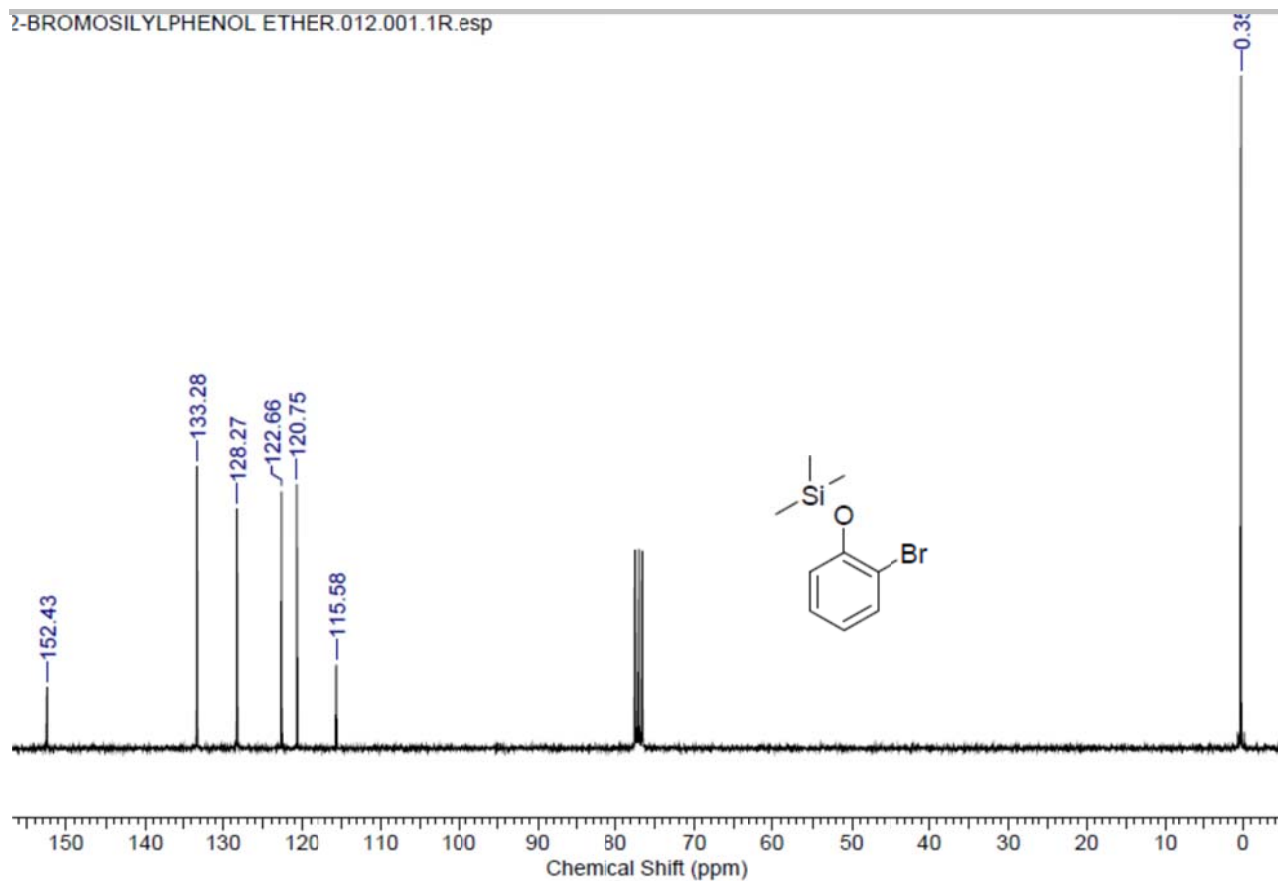

**Precursors for Scheme 2:**

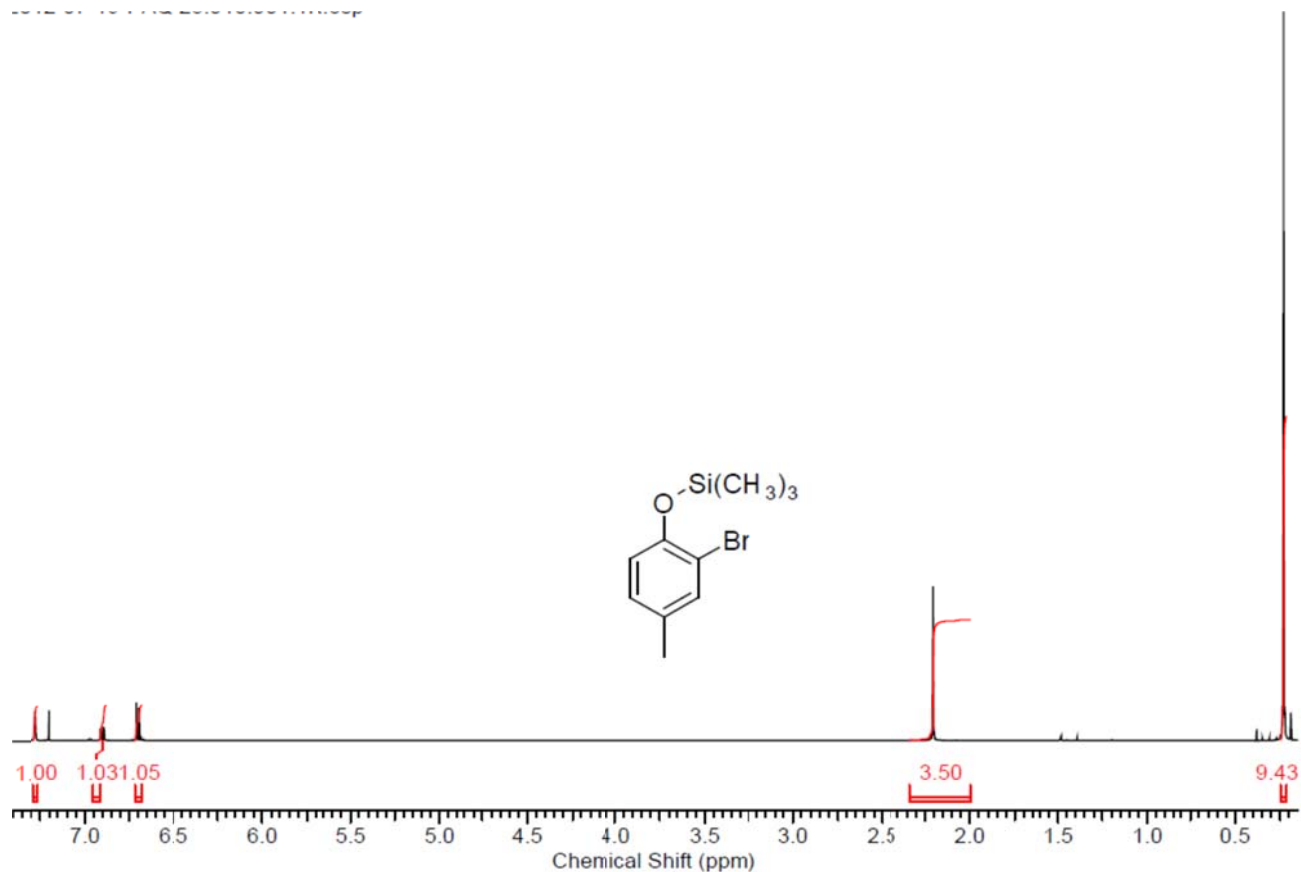

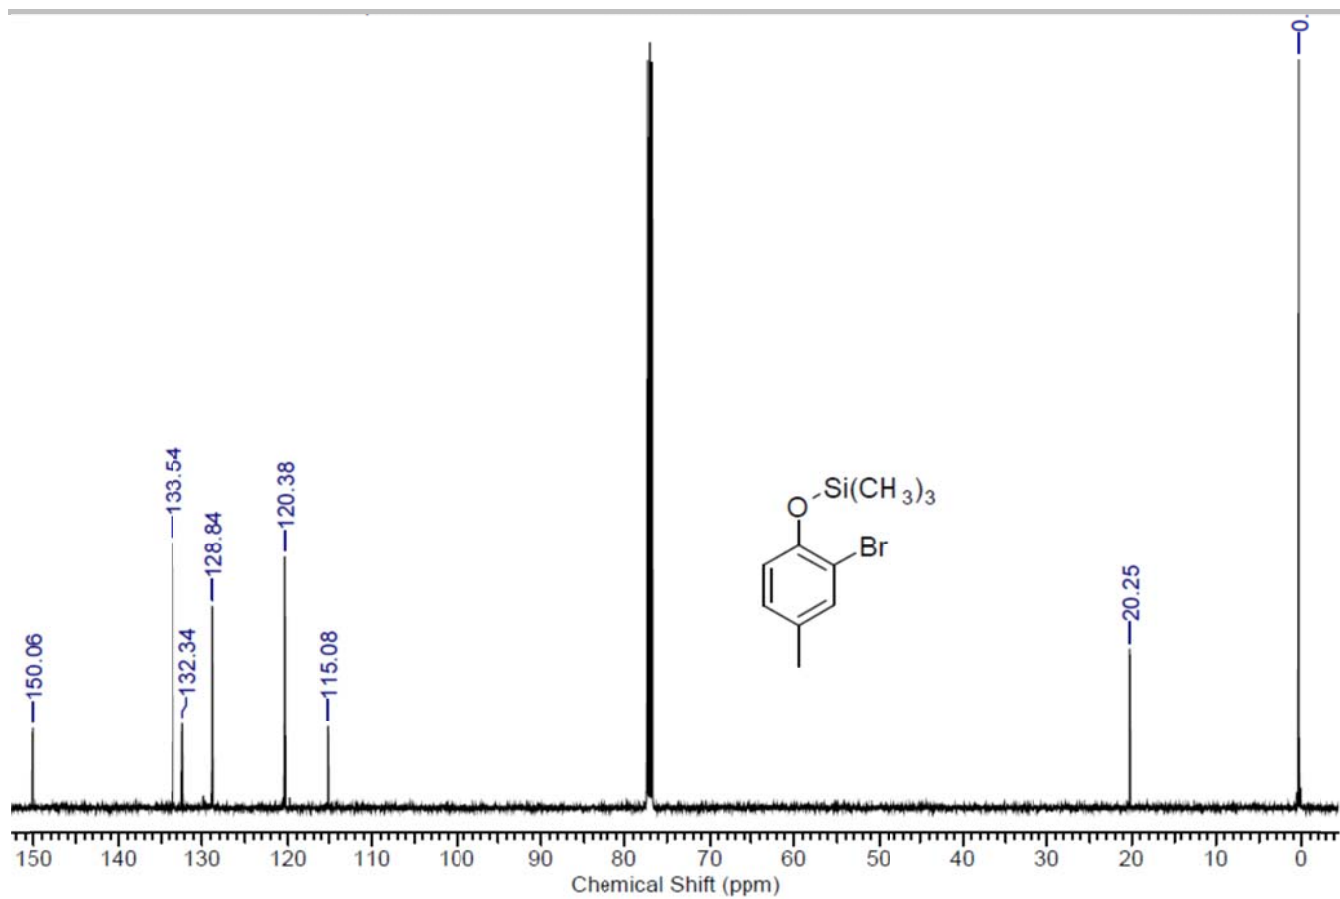

**Compound 5:**

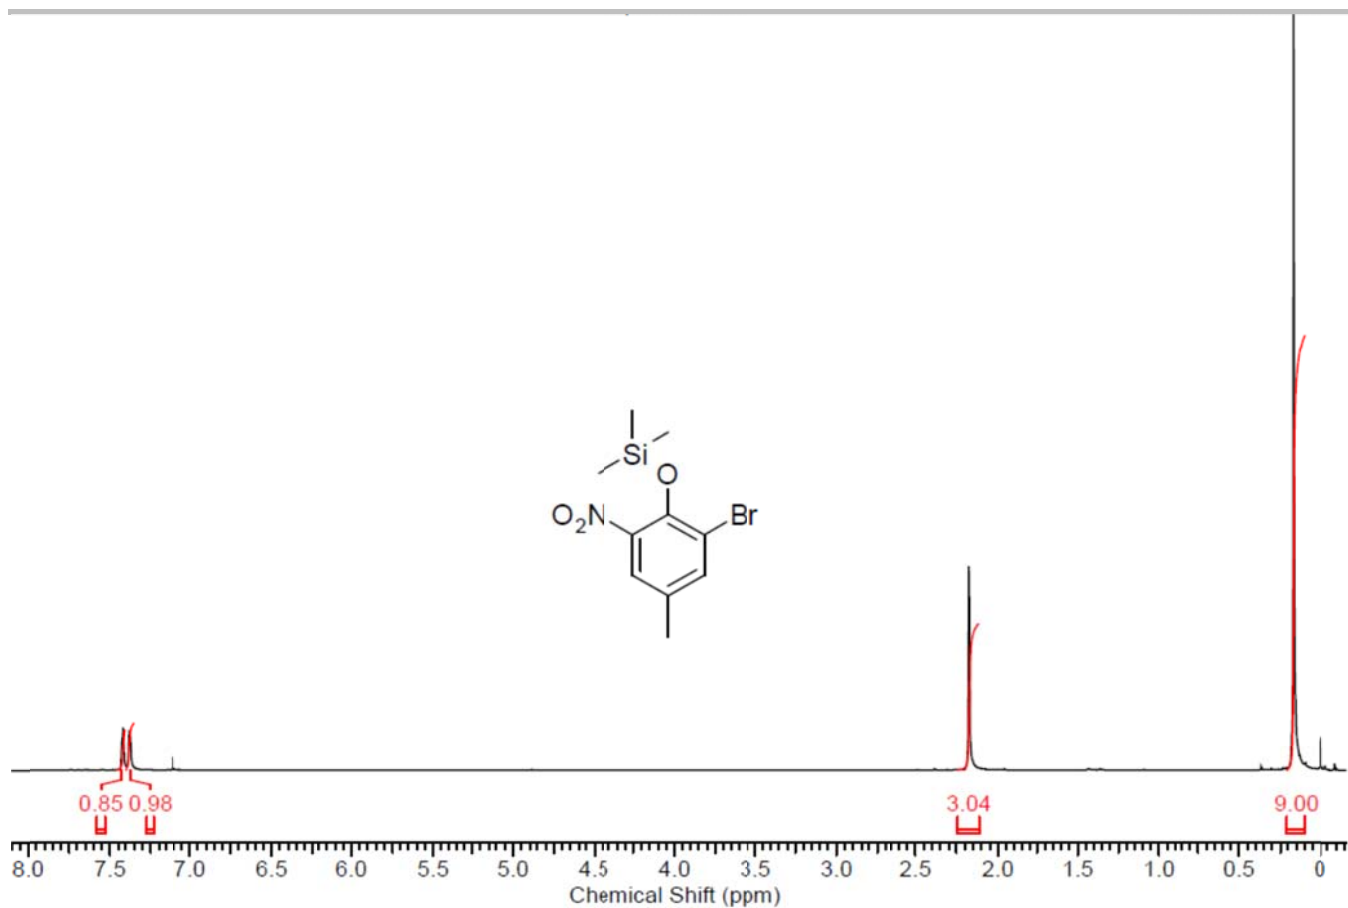

-NITRO-4-METHYL-2-BROMO SILYLETHER.012.001.1R.esp

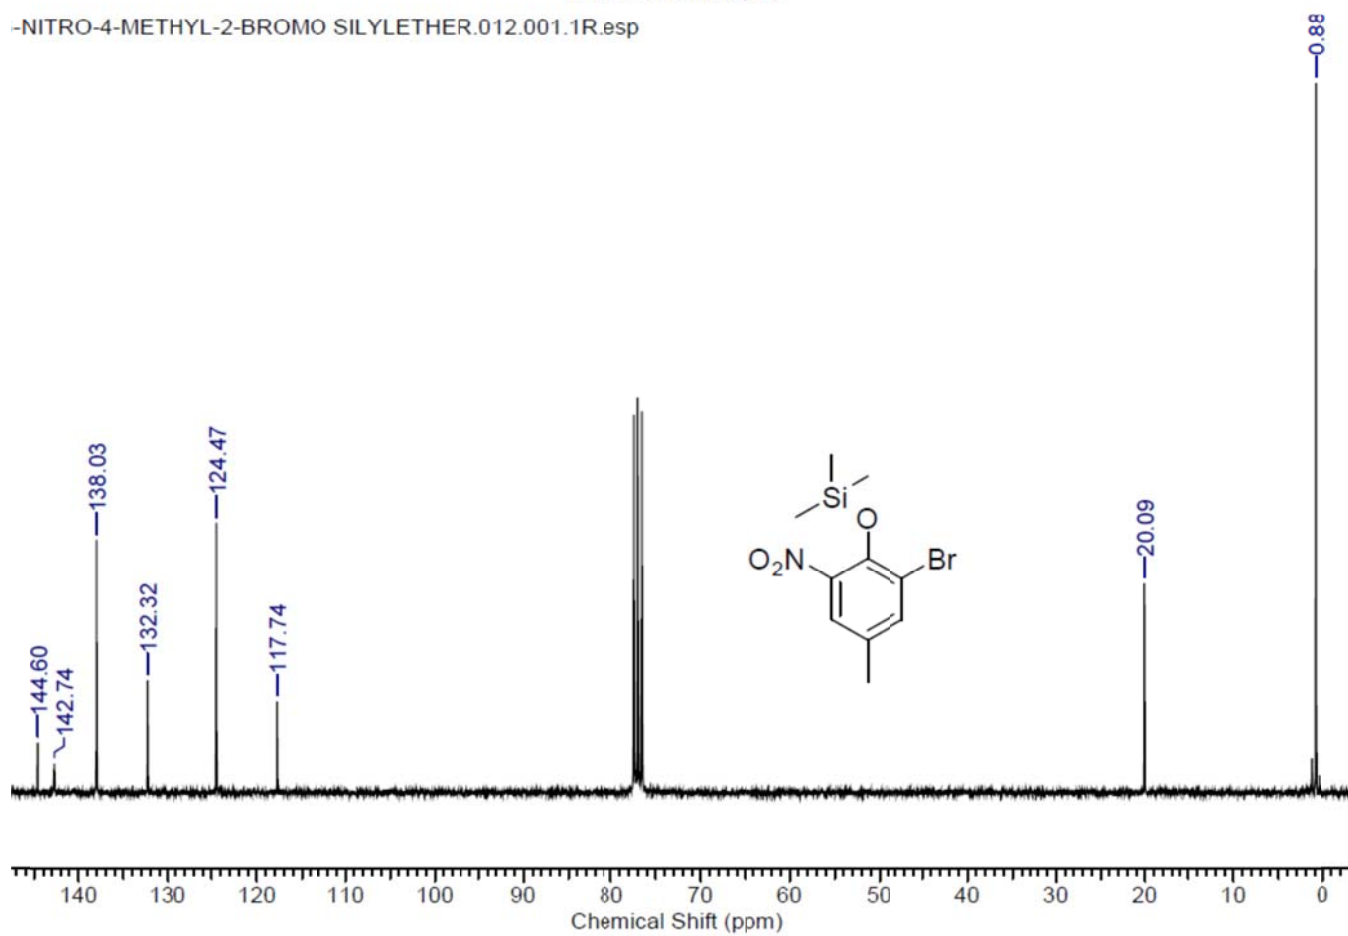

# Precursors for Scheme 7:

6-DIBROMO-4-METHYL SILYLEETHER.010.001.1R.esp

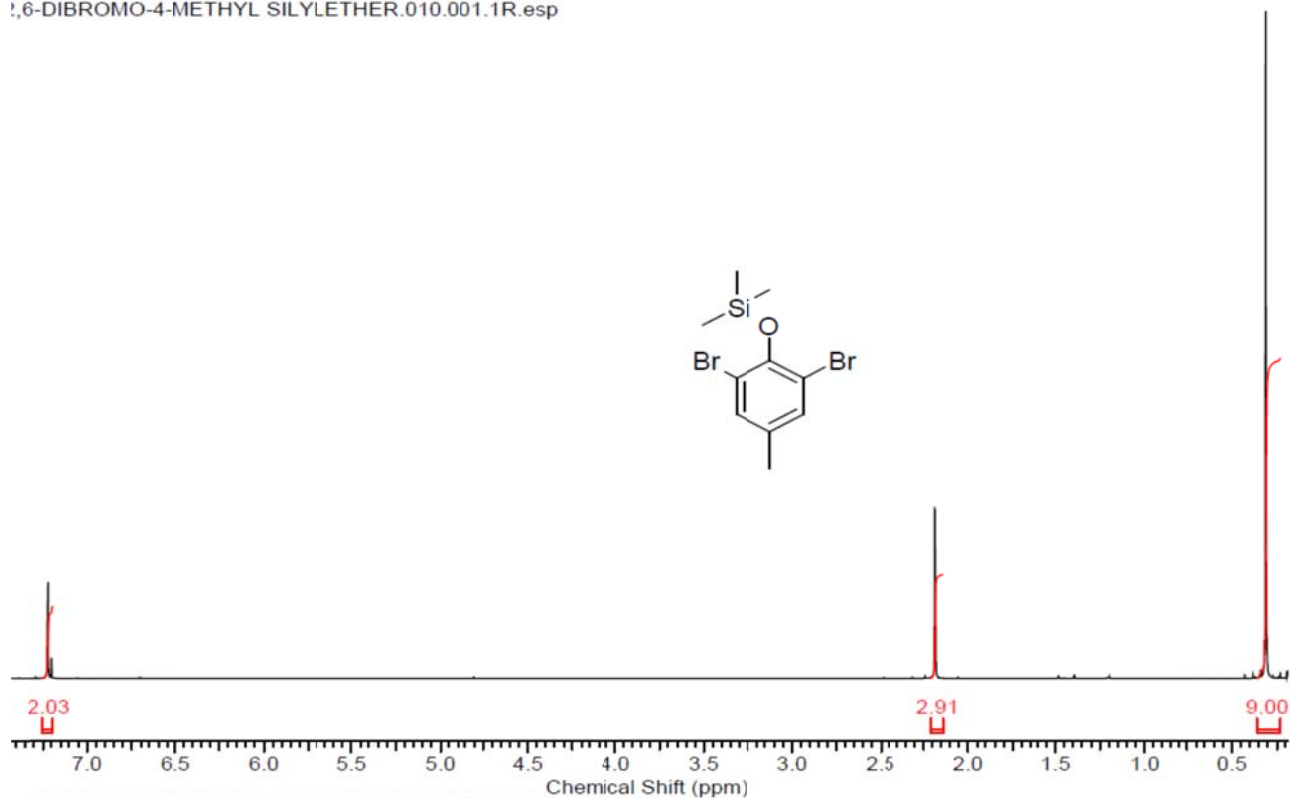

6-DIBROMO-4-METHYL SILYLEETHER.012.001.1R.esp

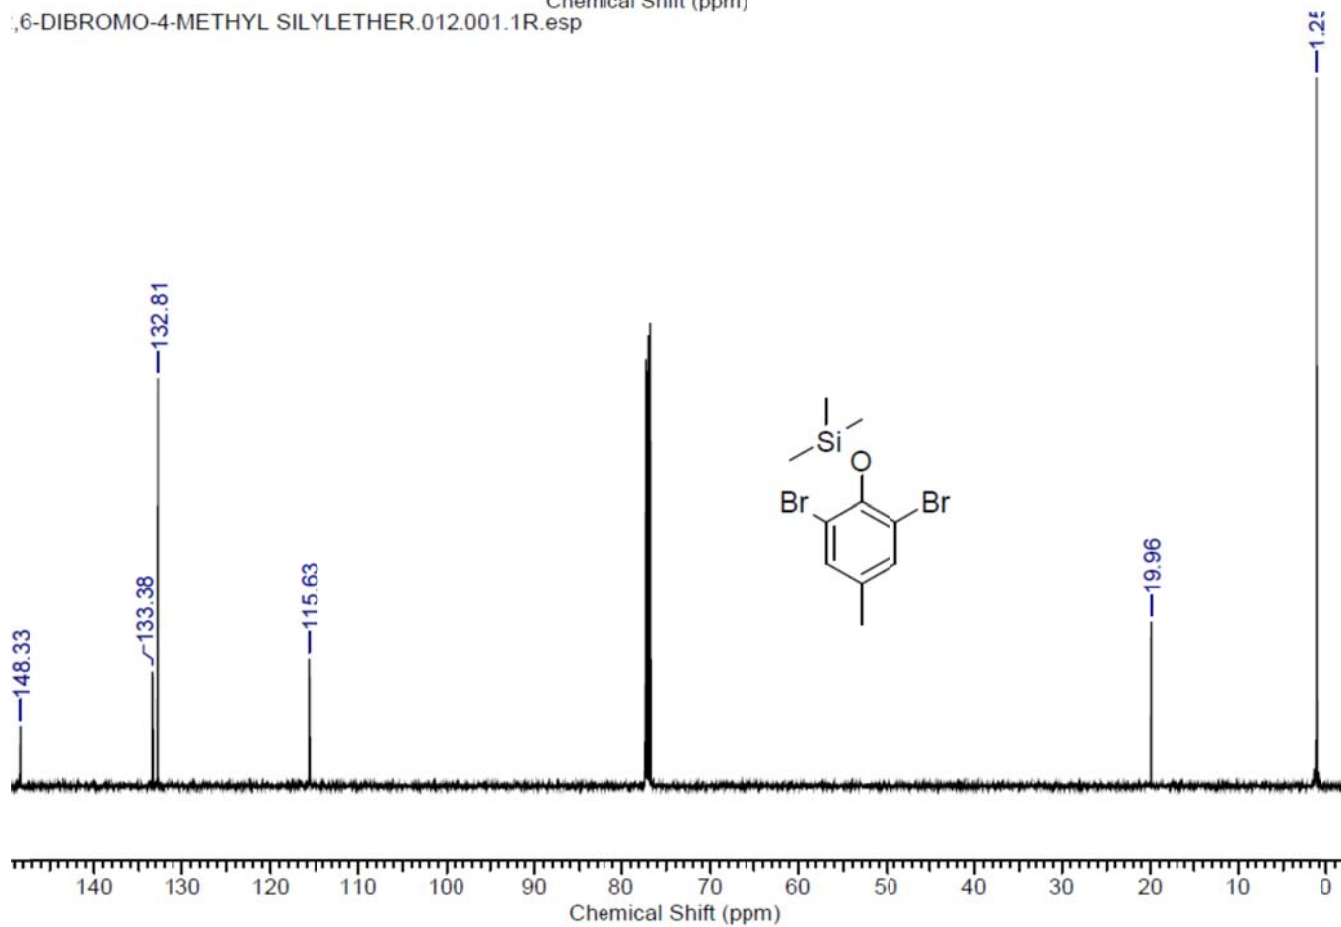

### Precursors for Scheme7:

i-BROMOTRIMETHYLSILYL PHENOL.015.001.1R.esp

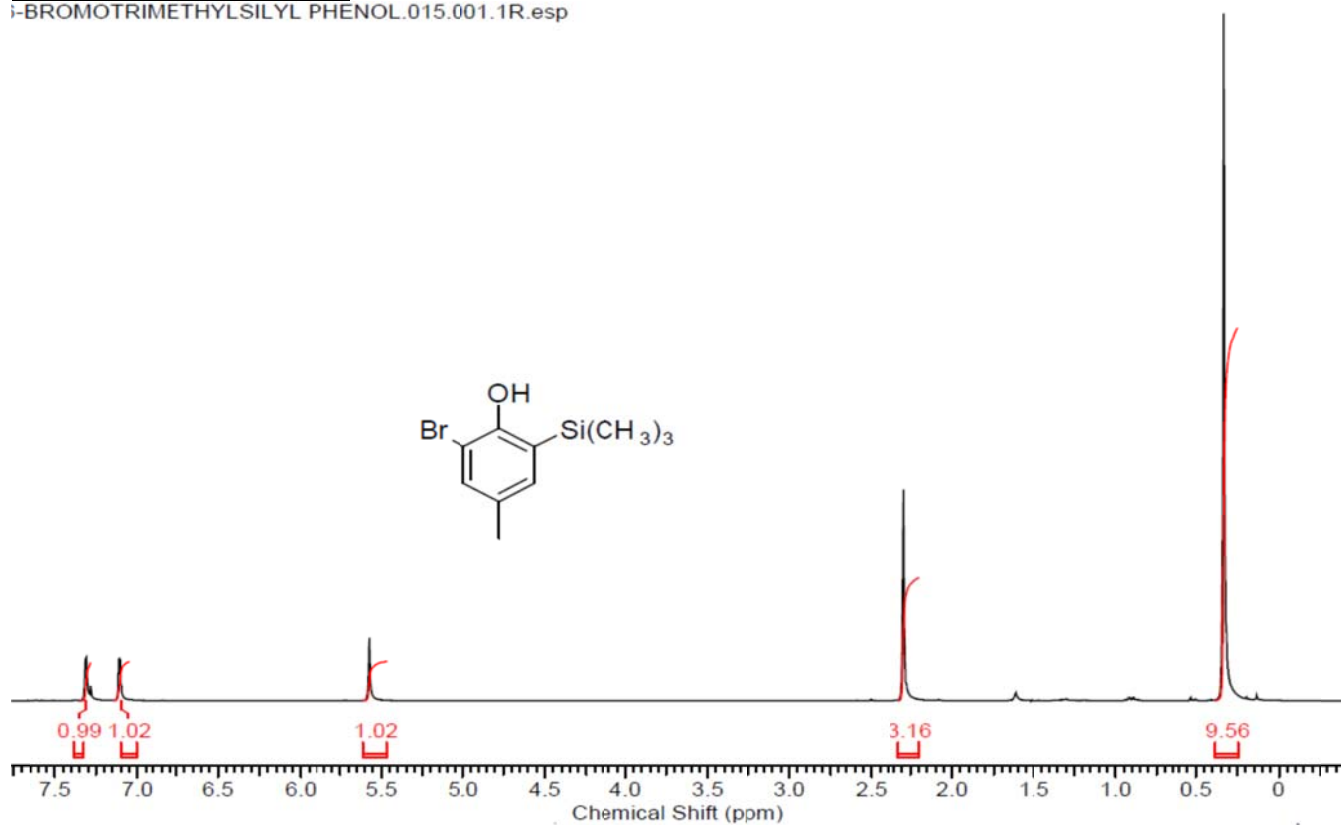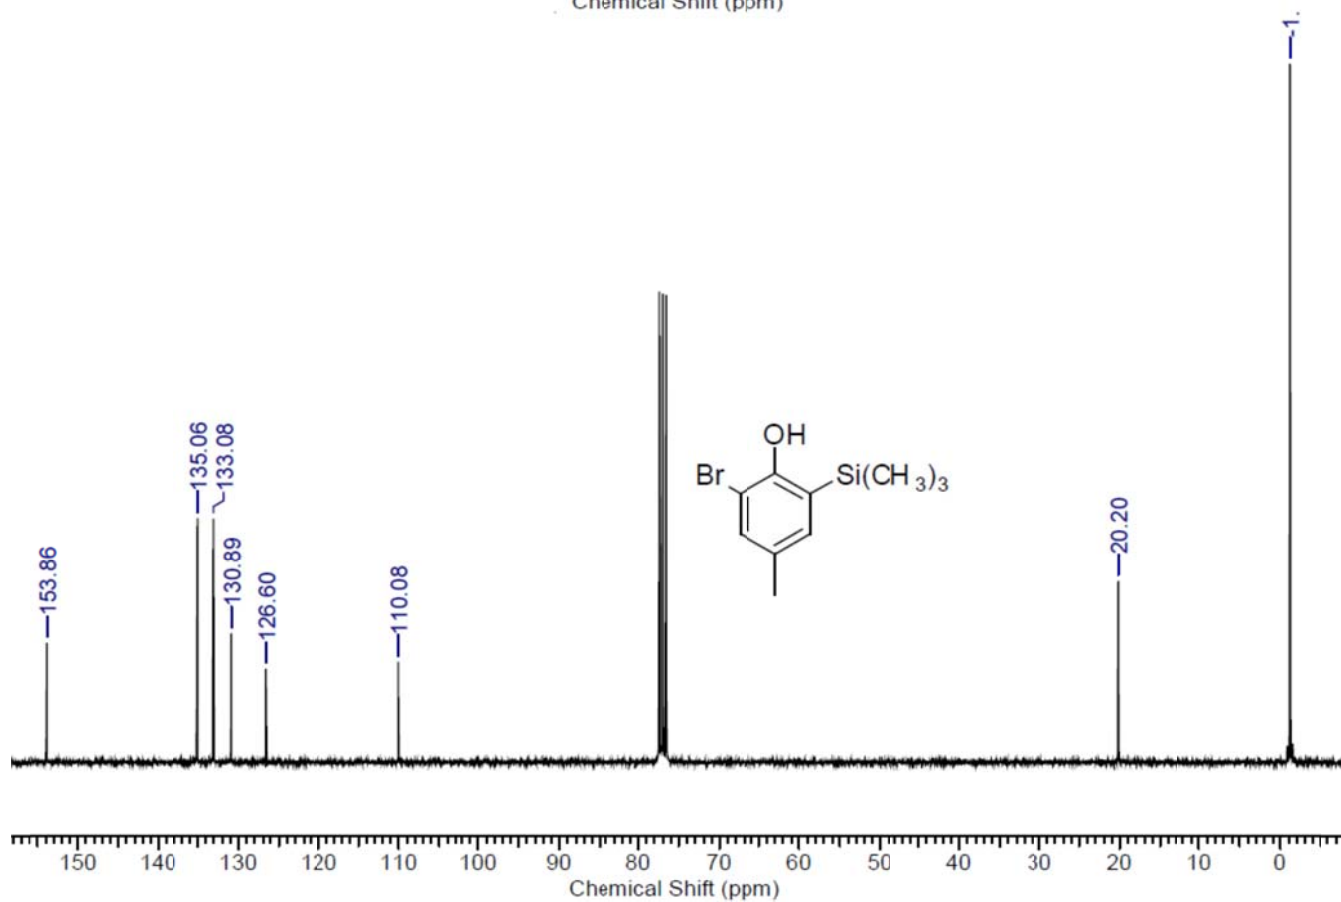

**Precursors for Scheme 7:**

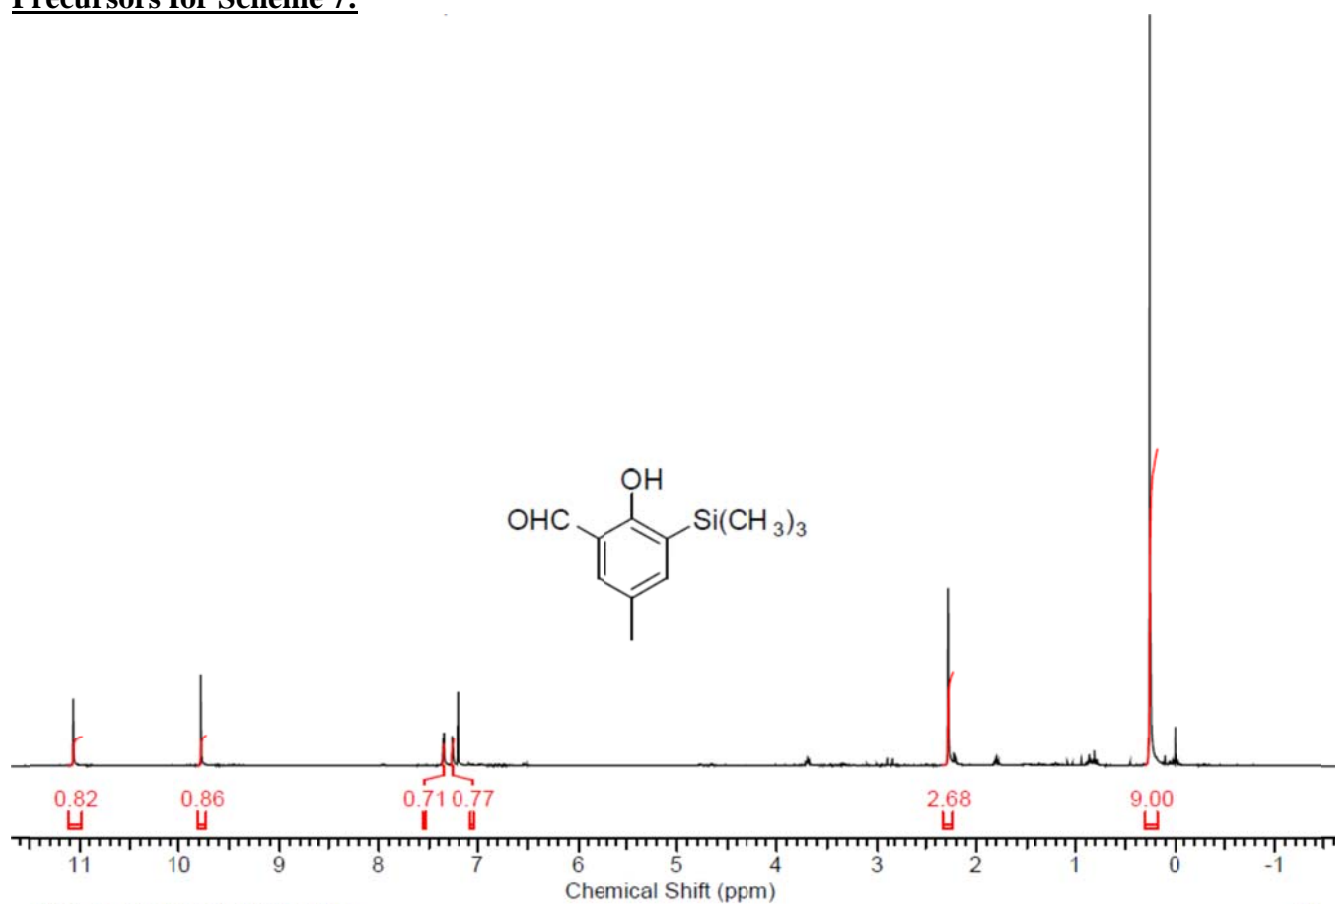

013-09-25-PAQ-45.011.001.1R.esp

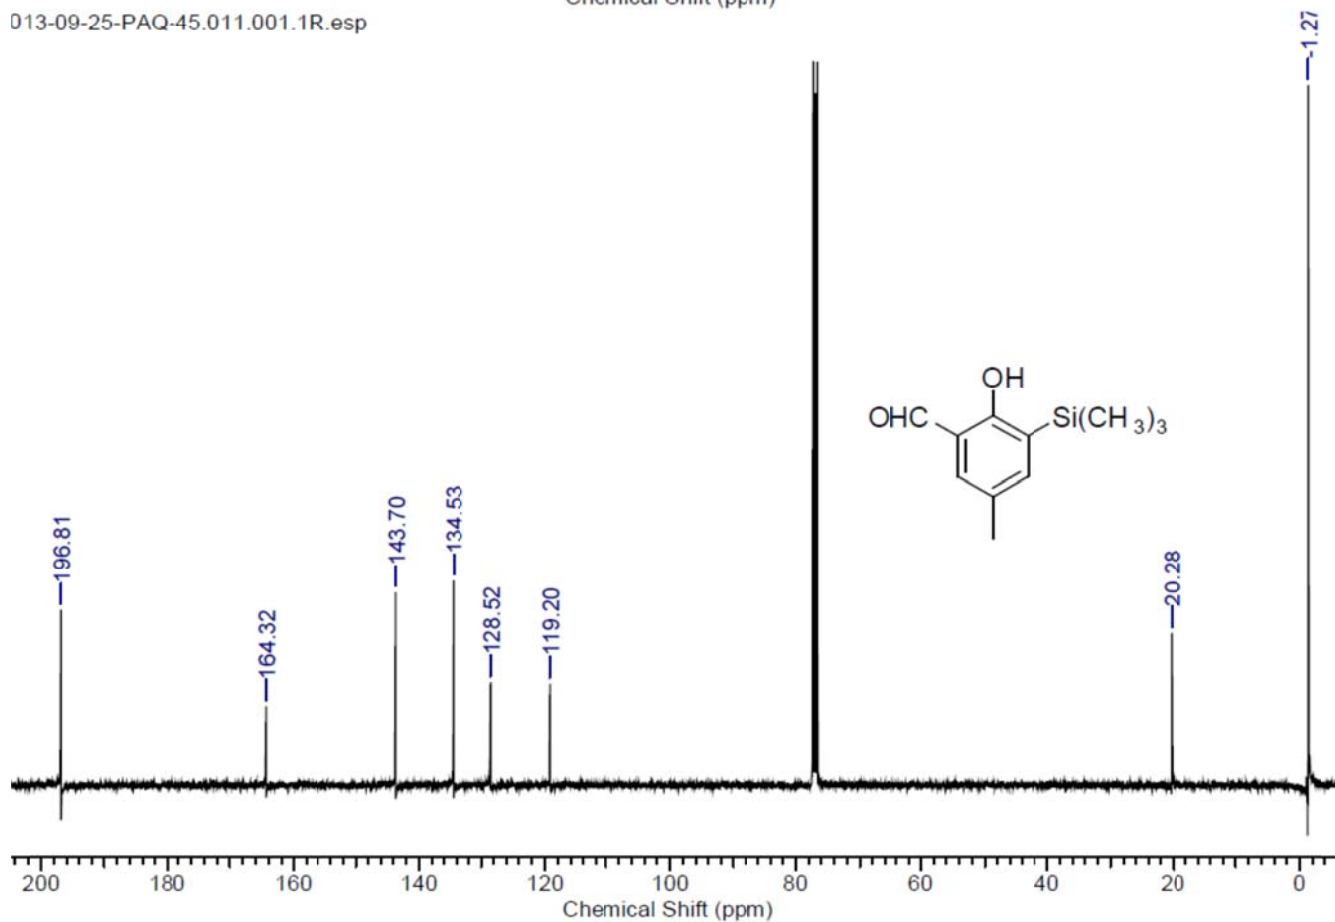

**Compound 6:**

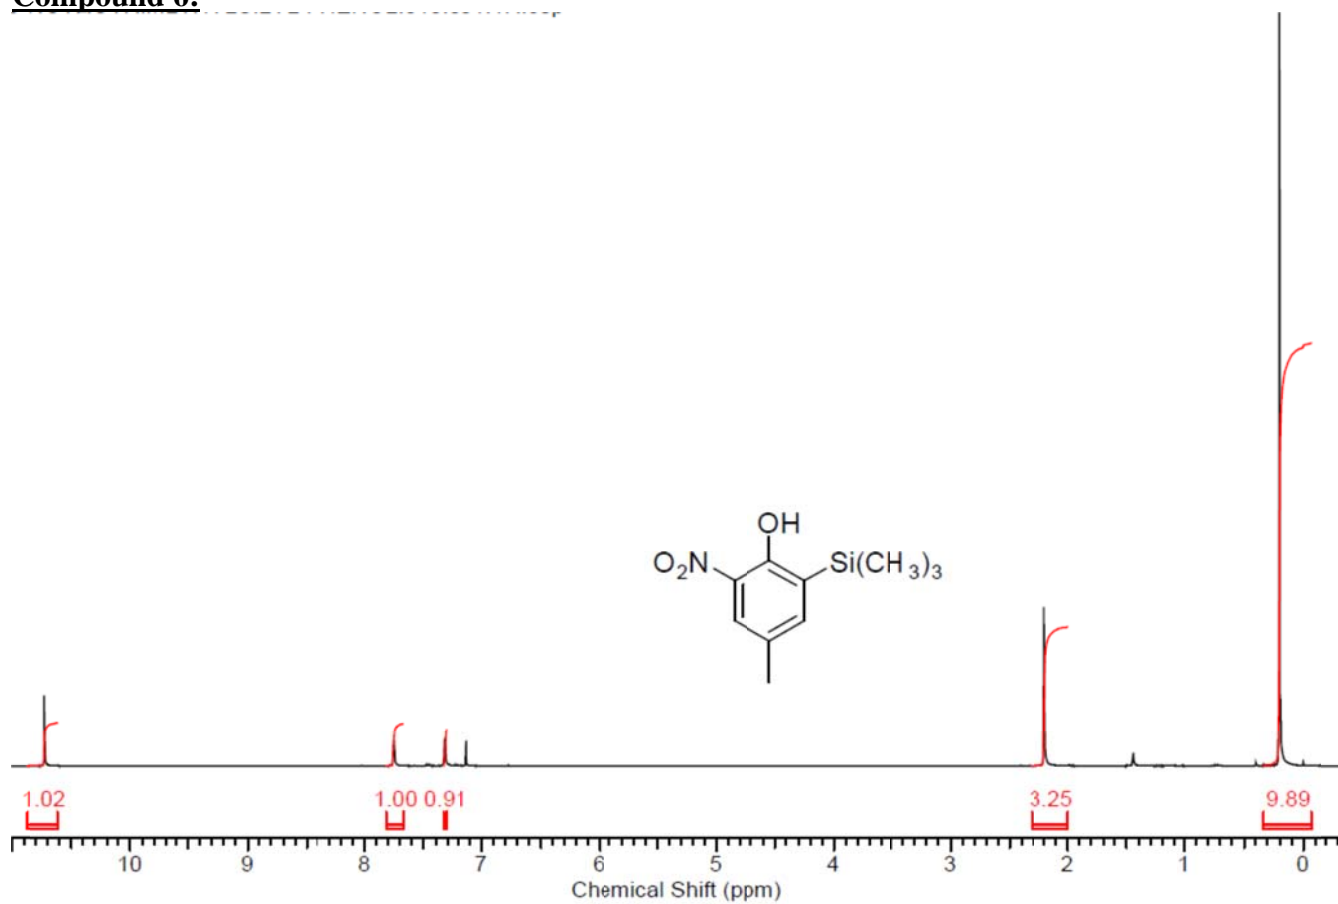



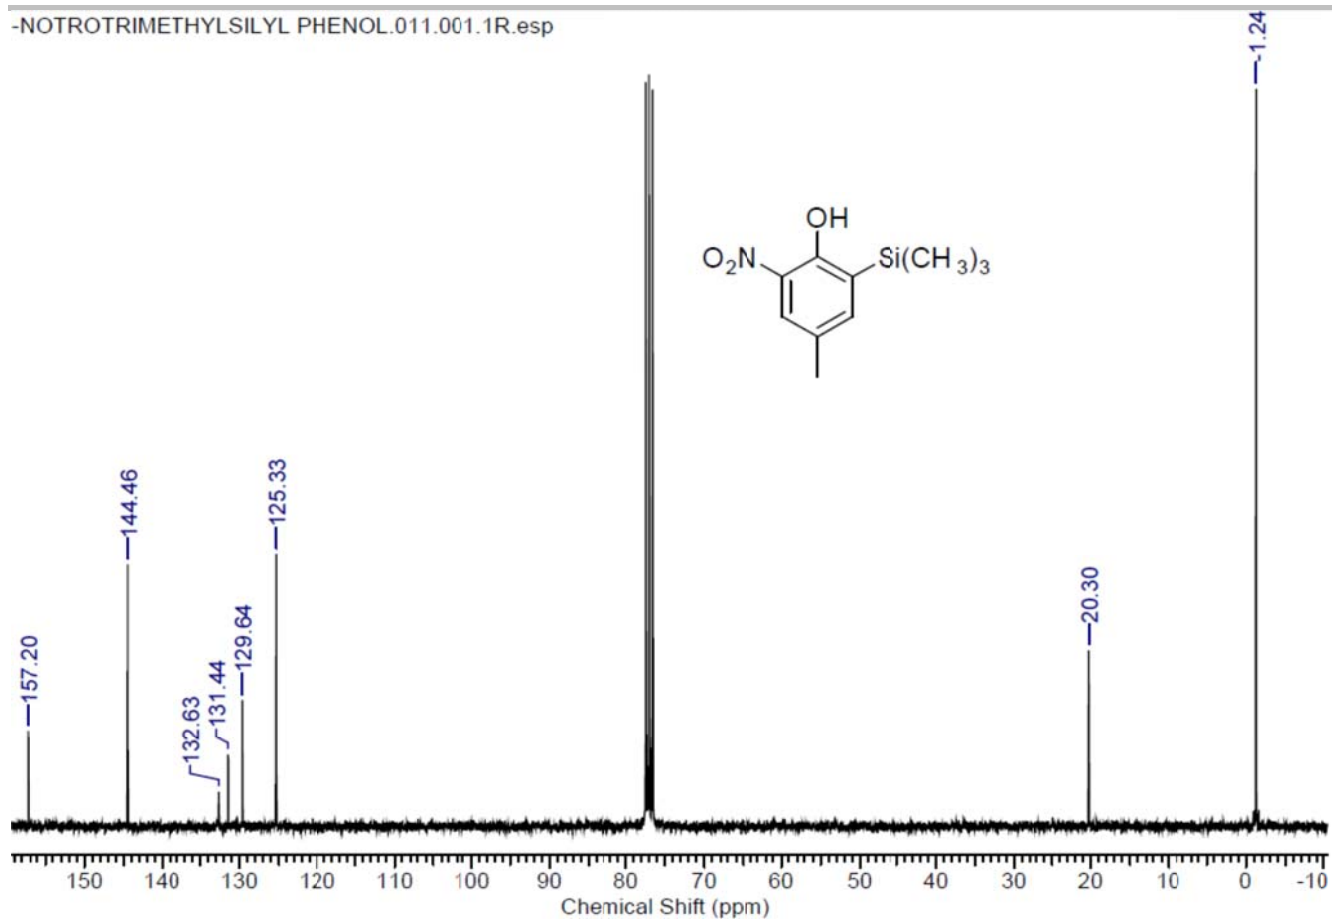

**Compound 19:**

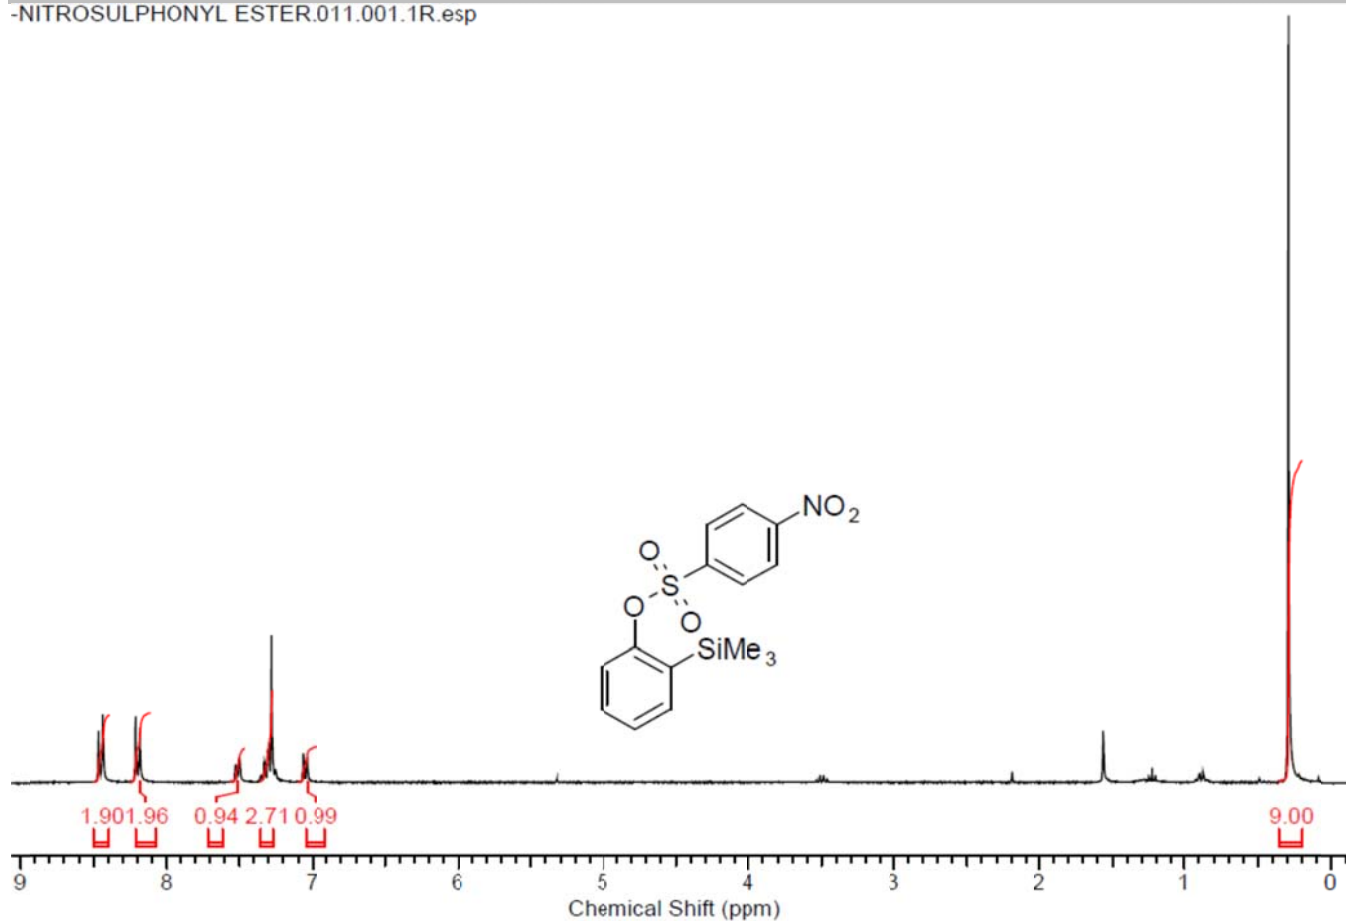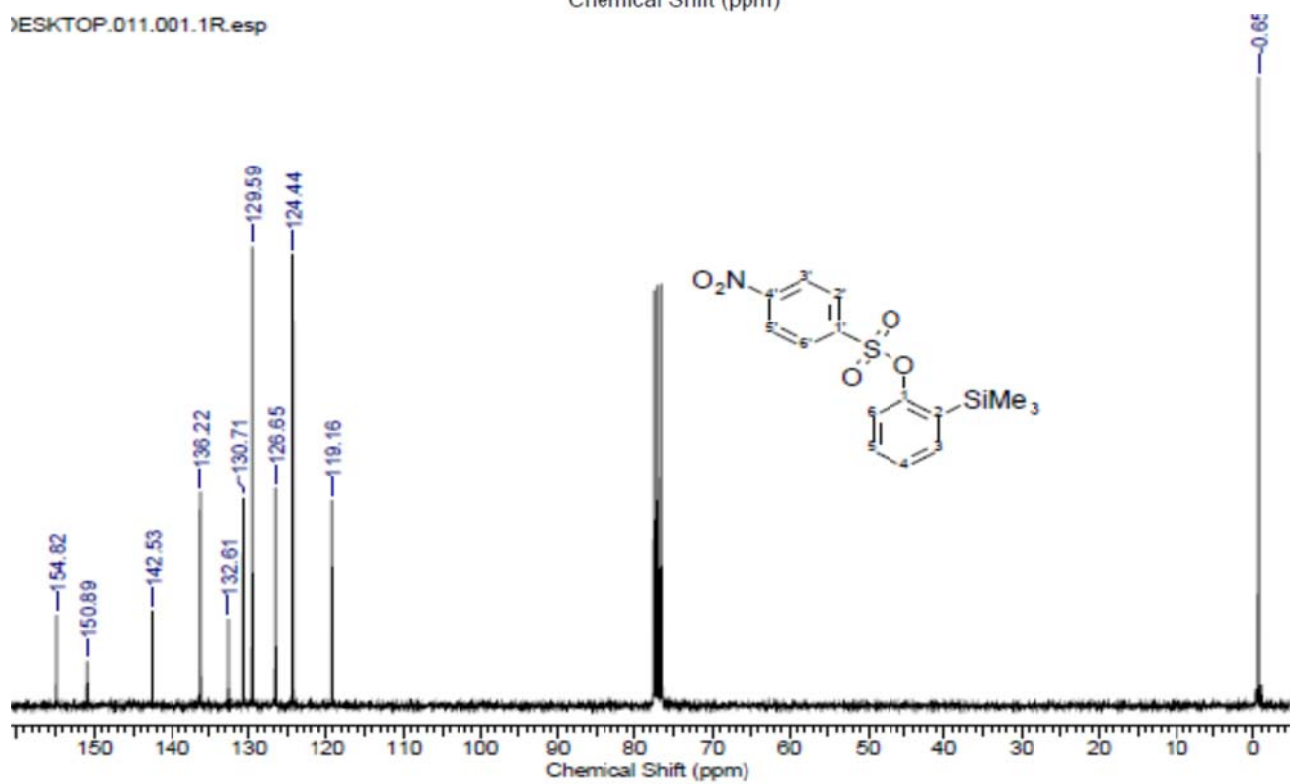

---

**Compound 20:**

---

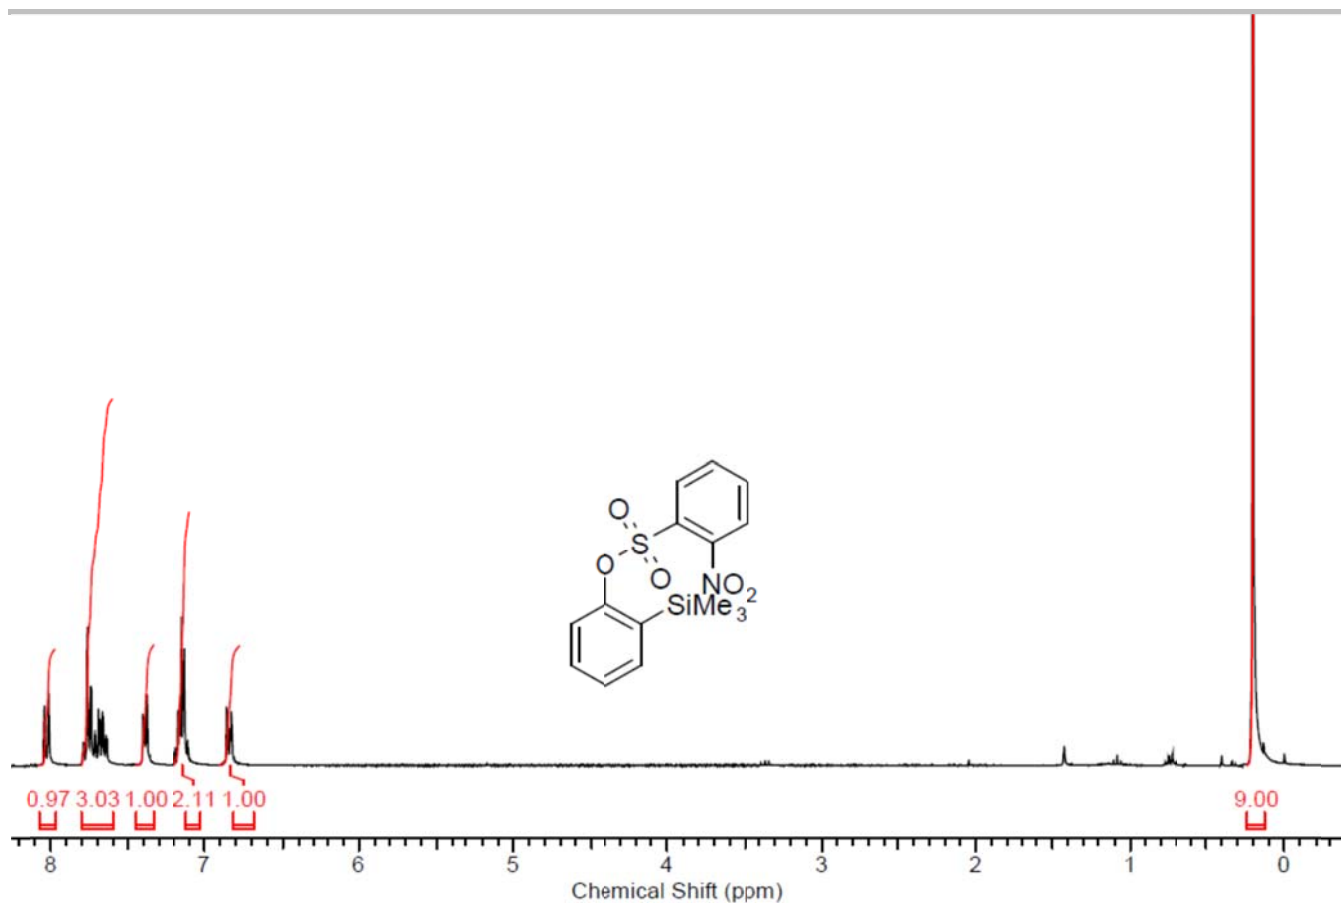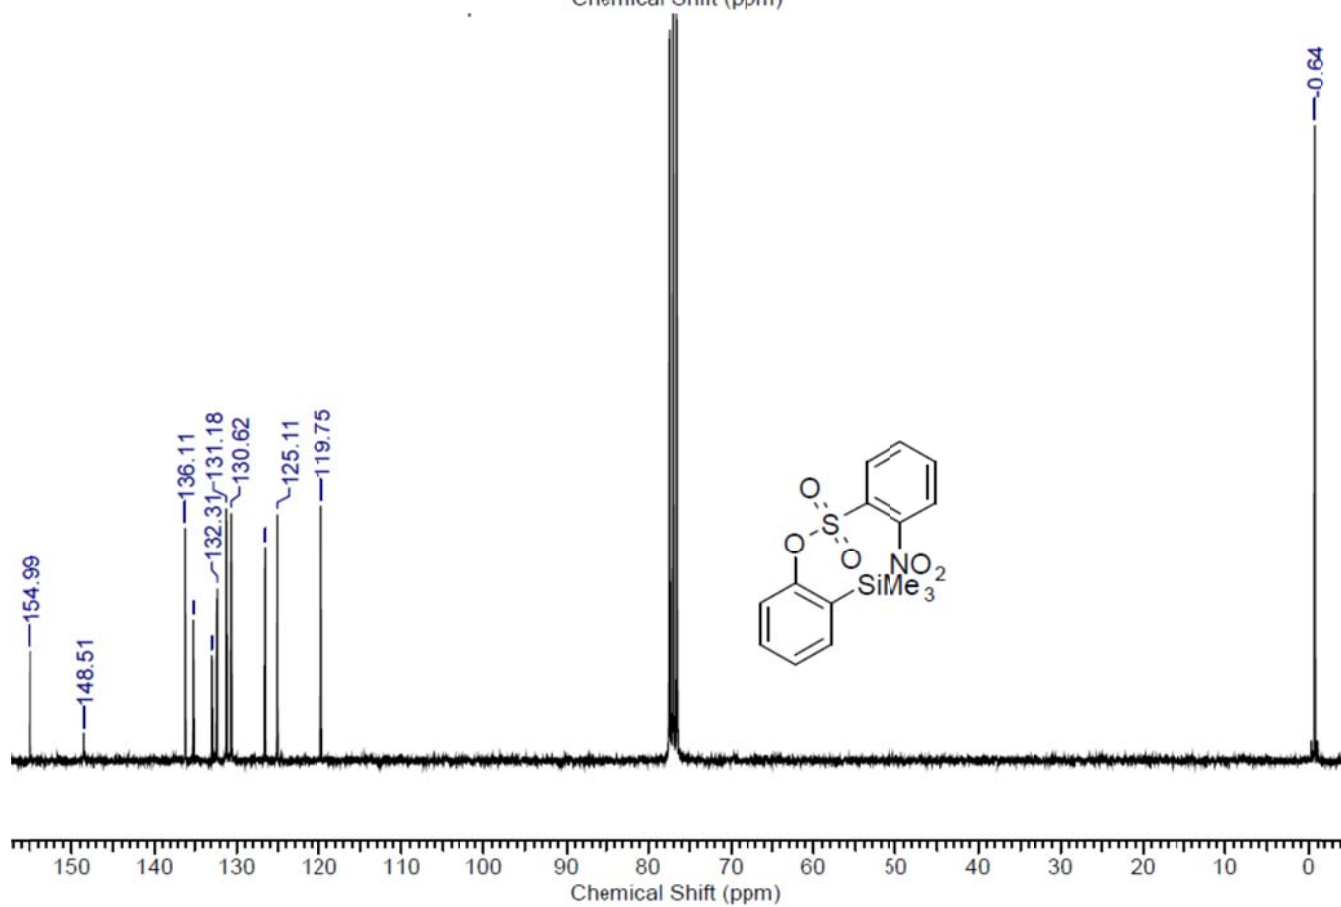

**Compound 21:**

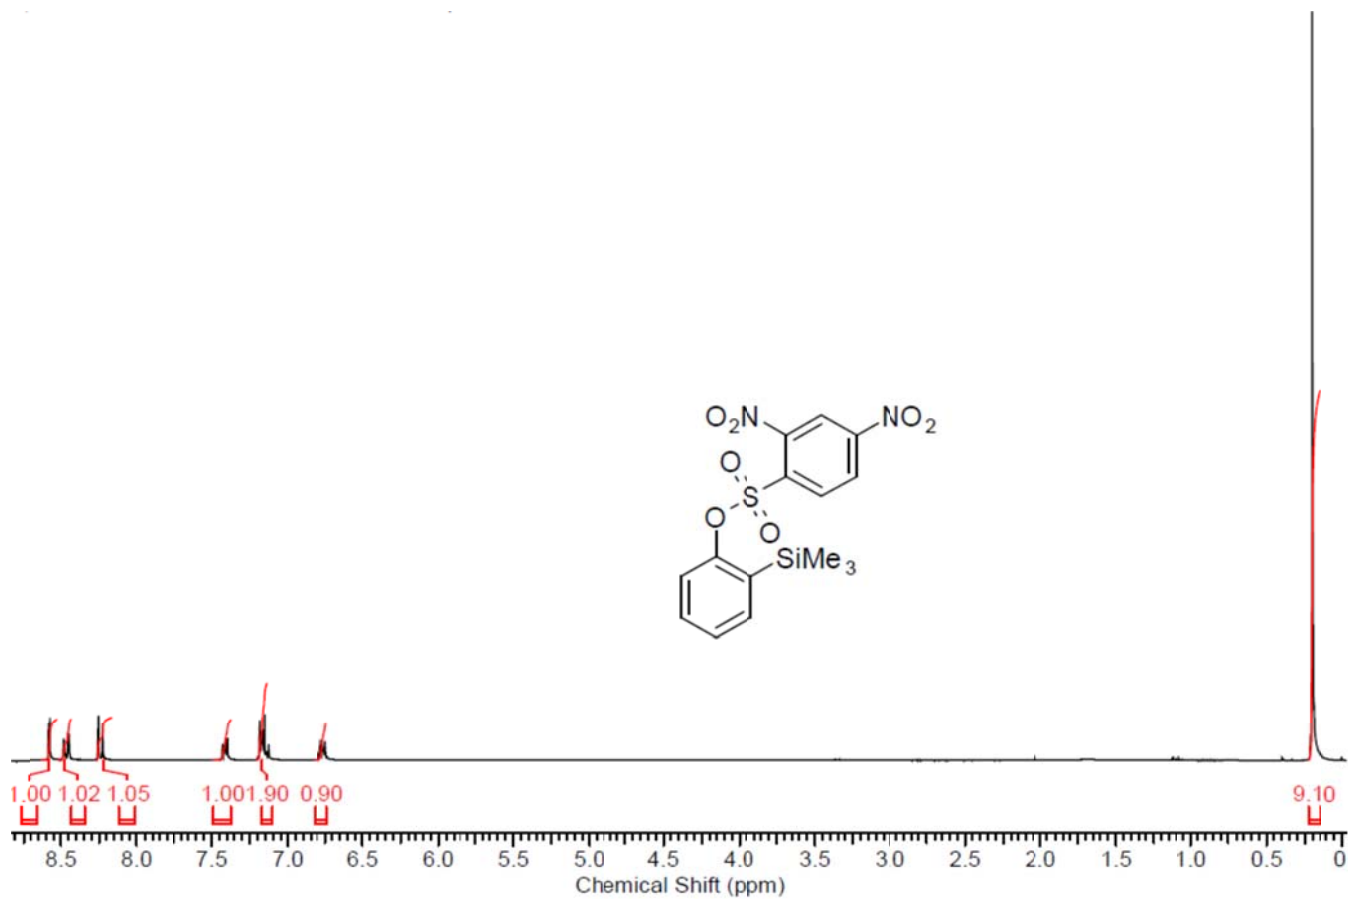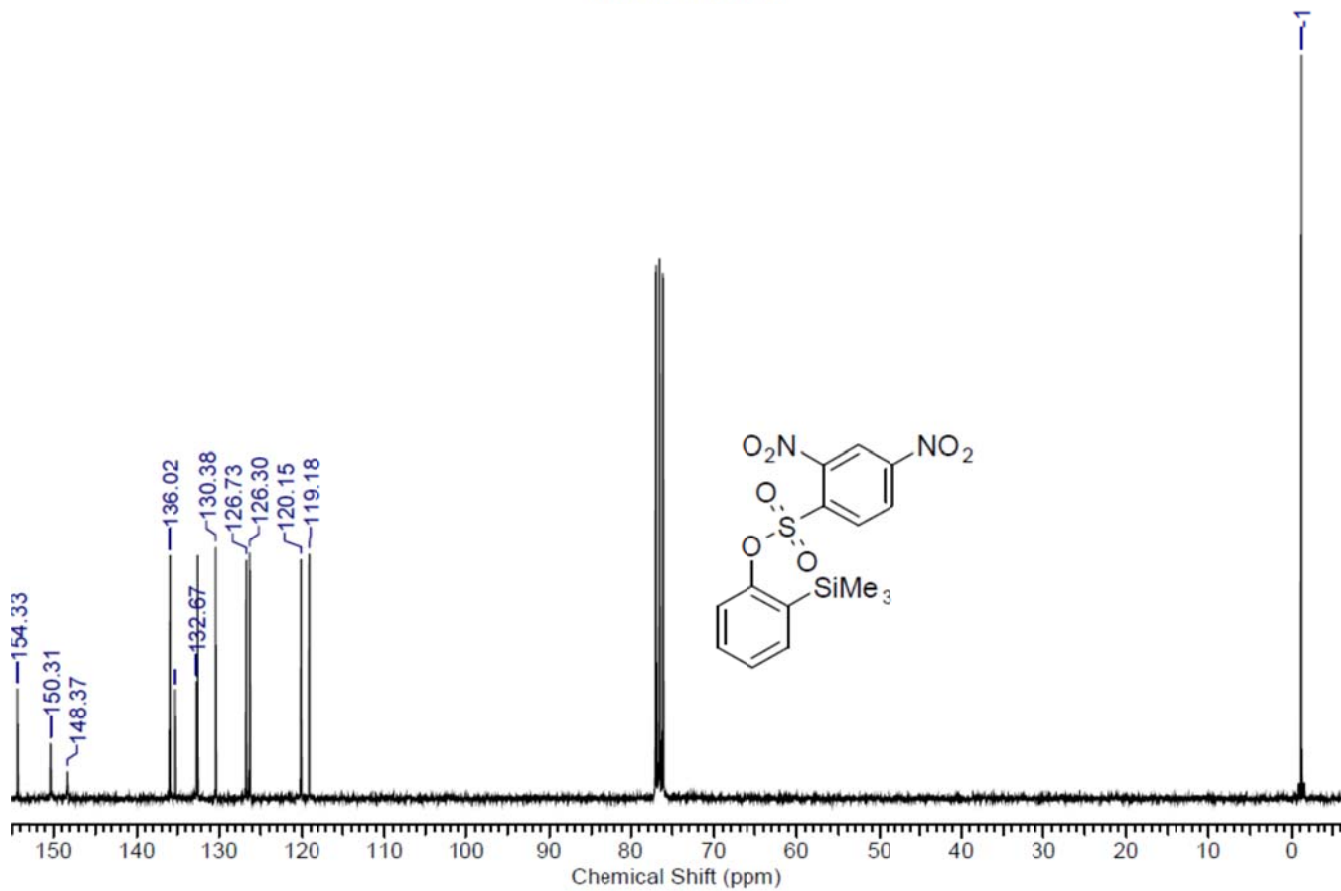

**Compound 50:**

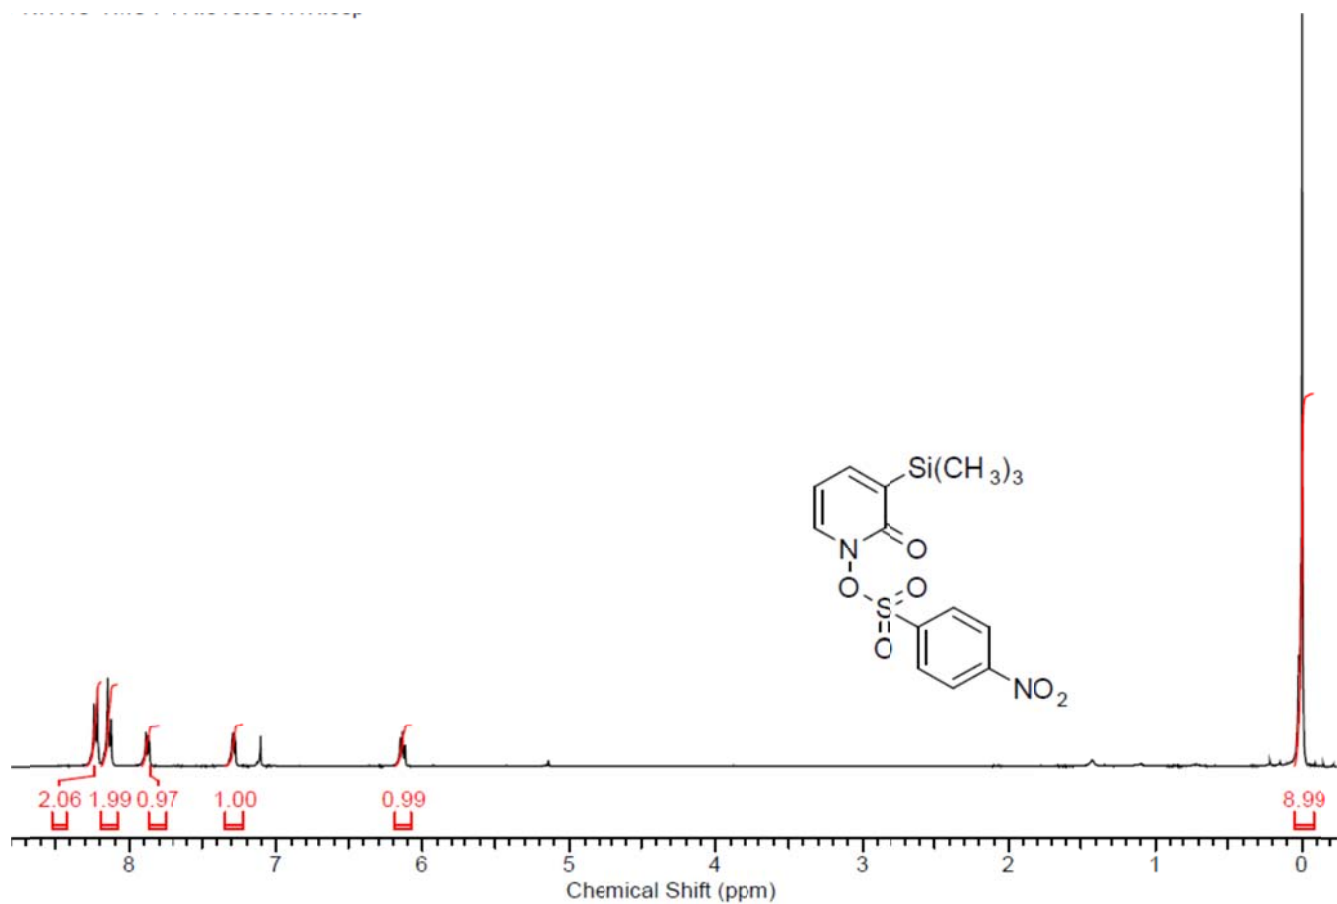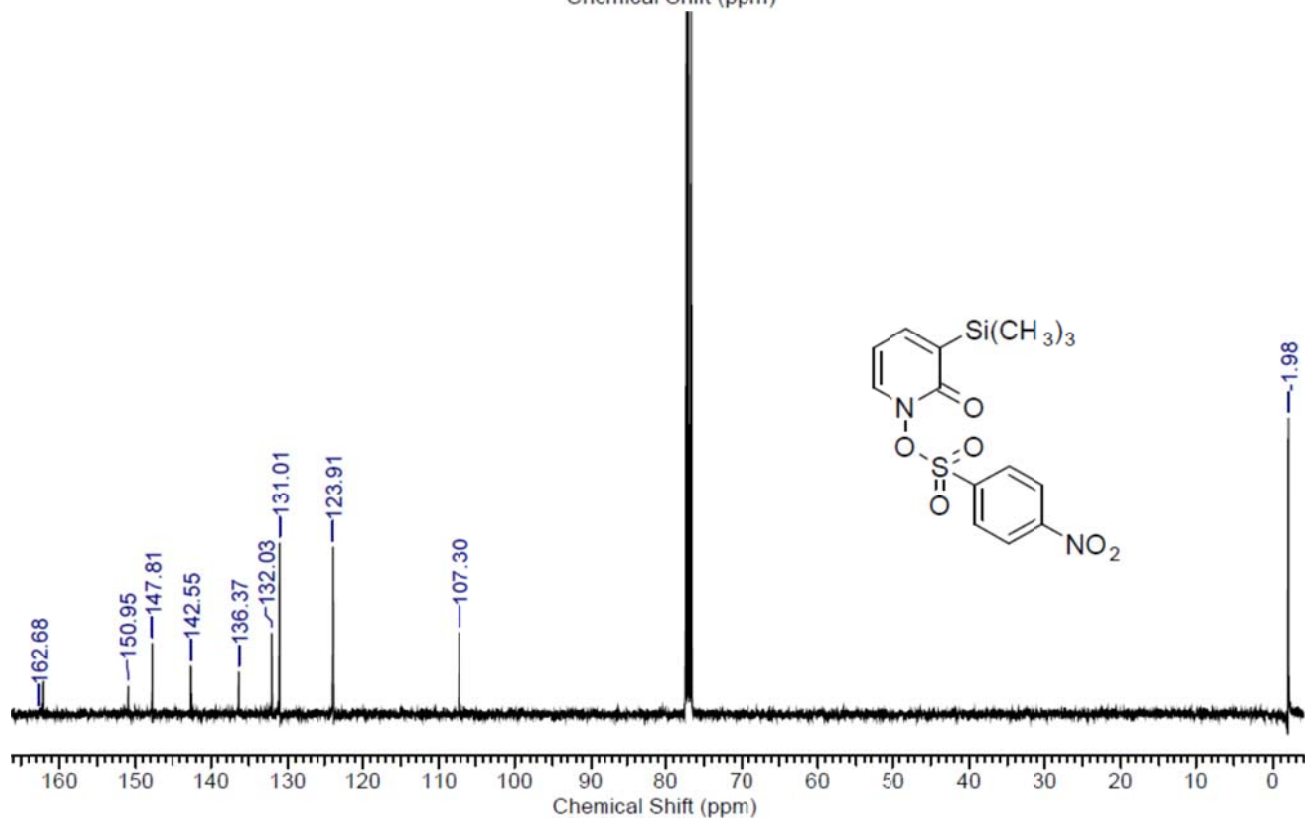

**Compound 24:**

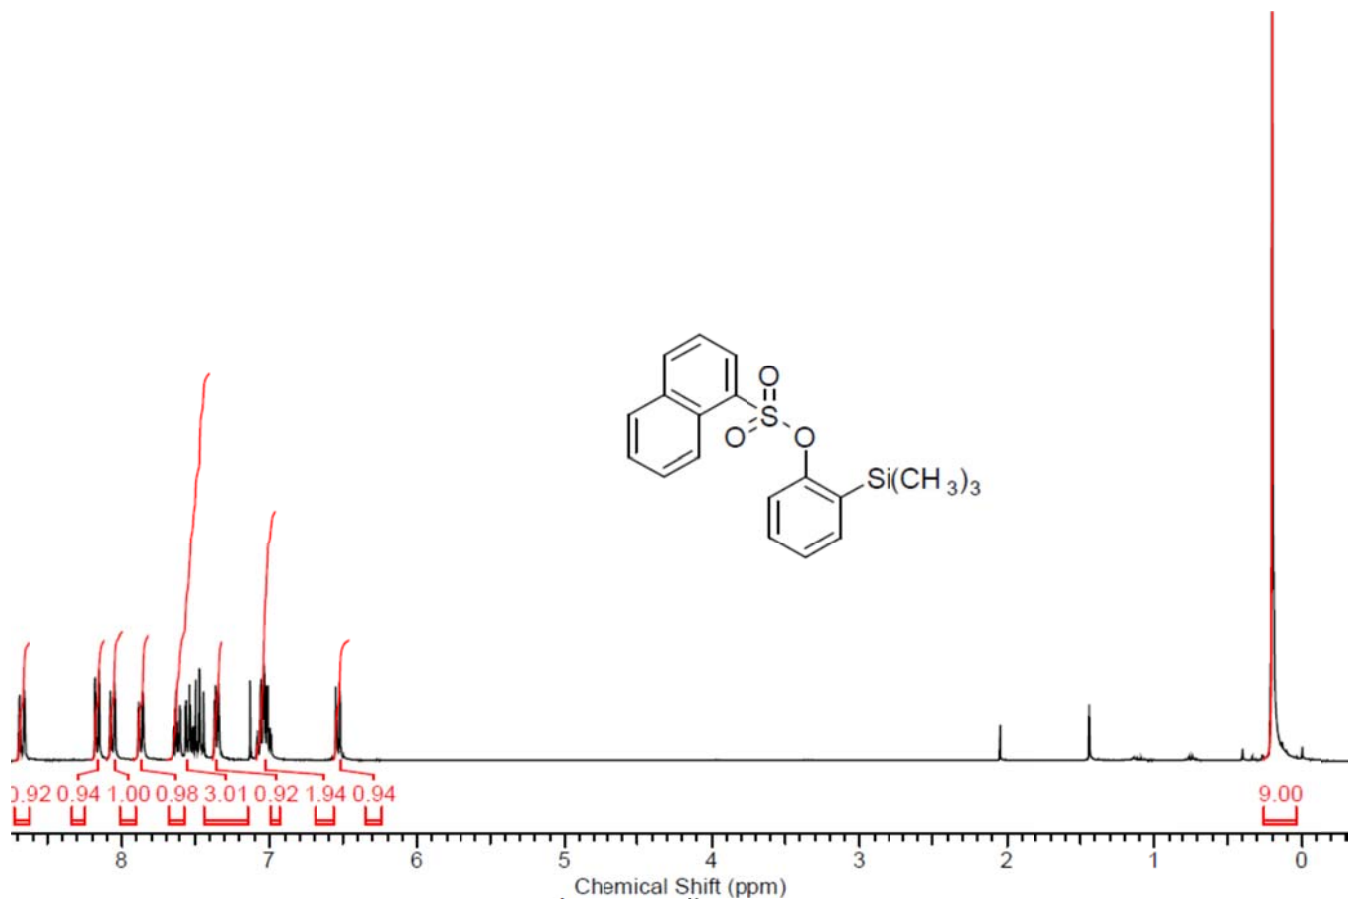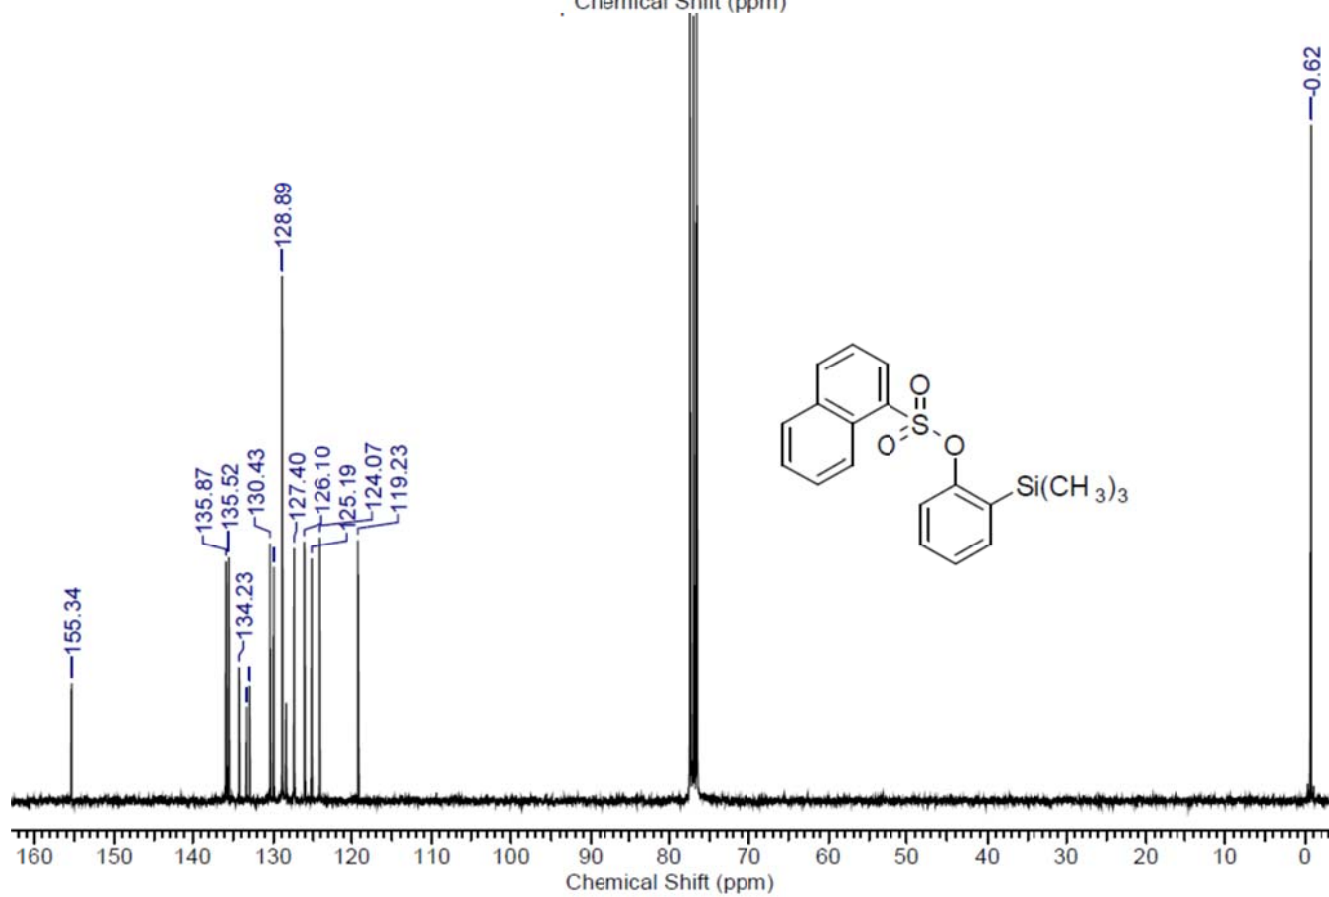

**Compound 23:**

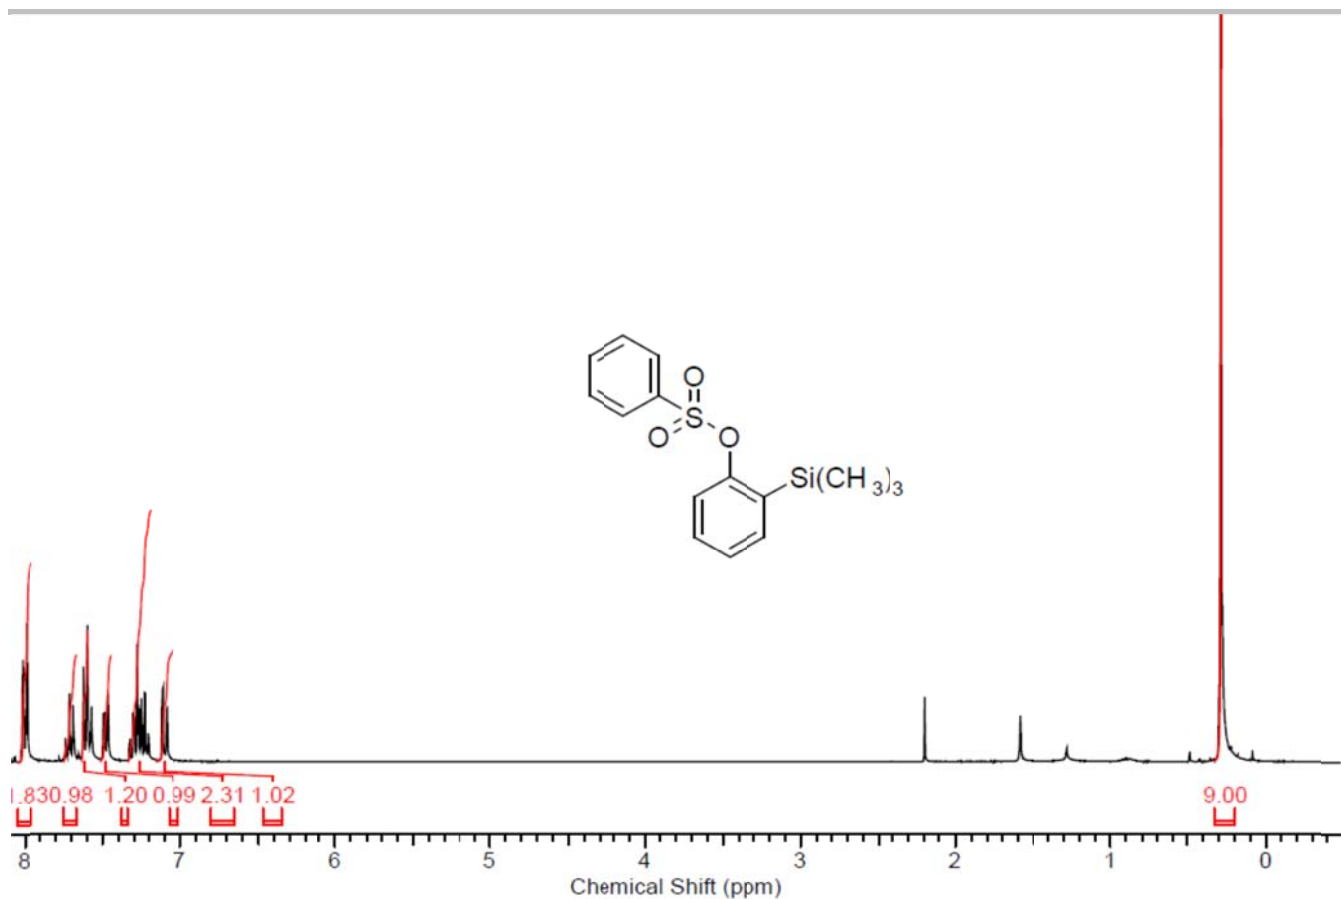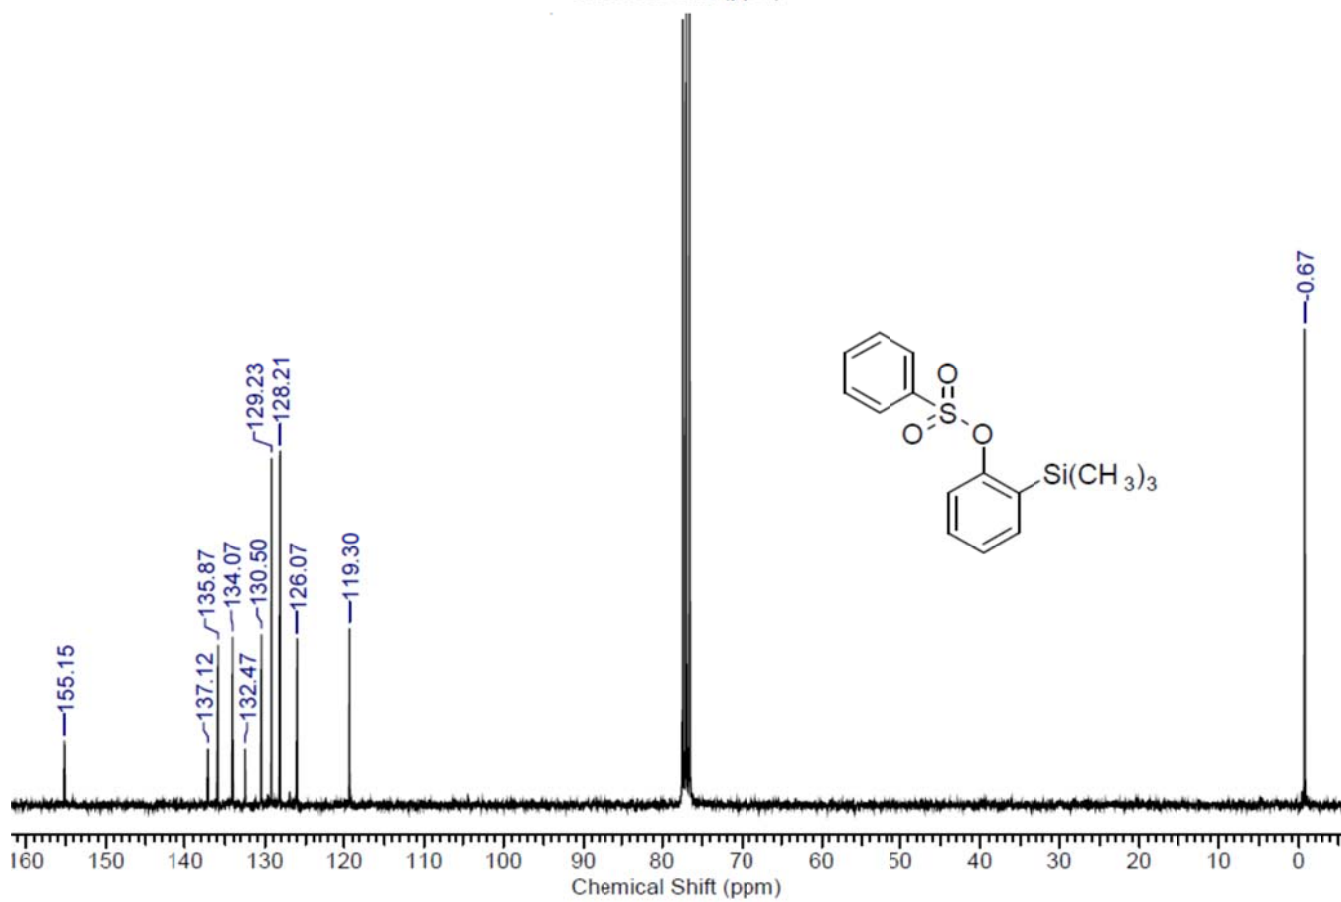

**Compound 22:**



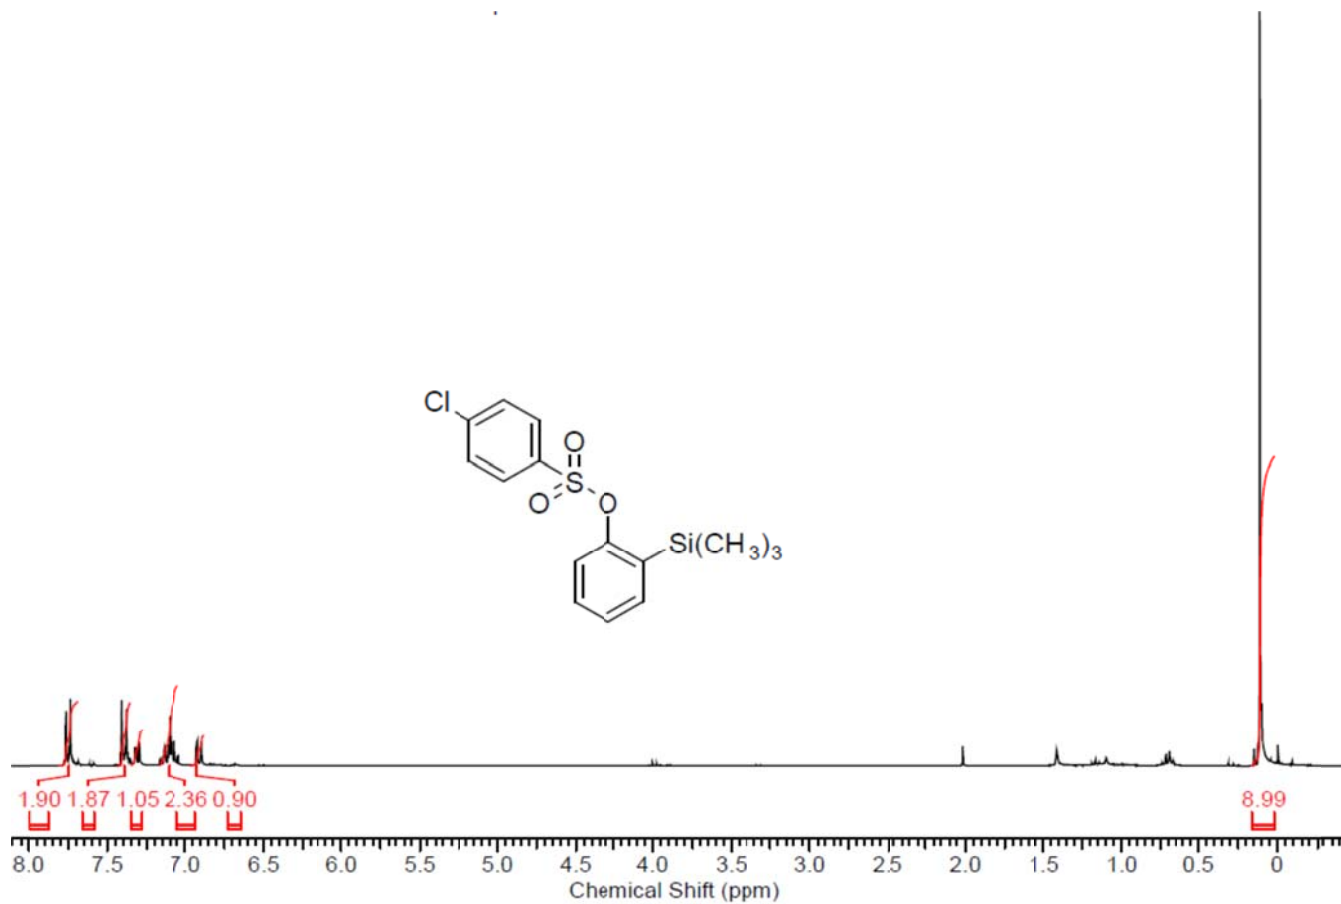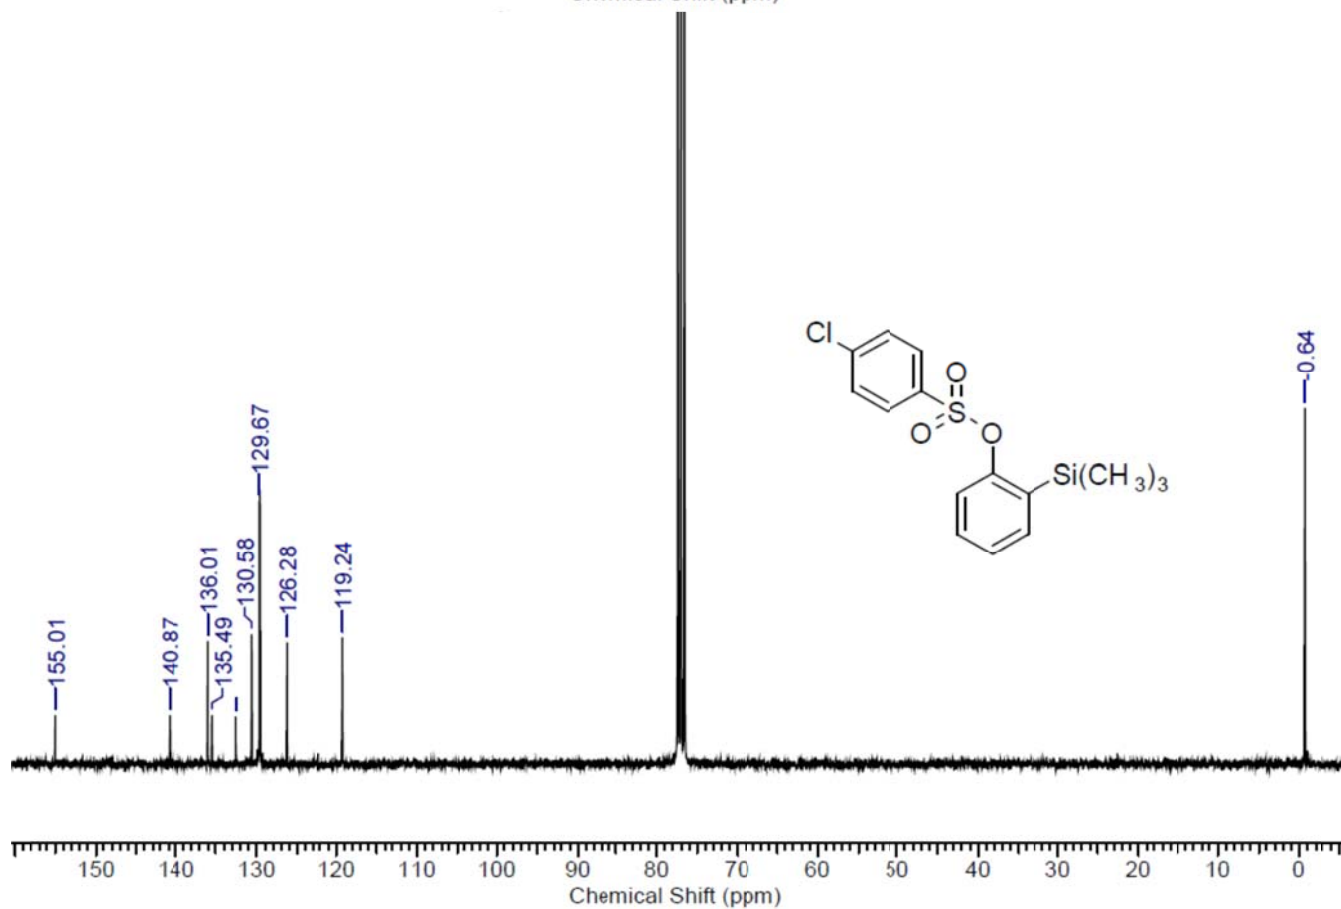

**Precursors for Scheme 9:**

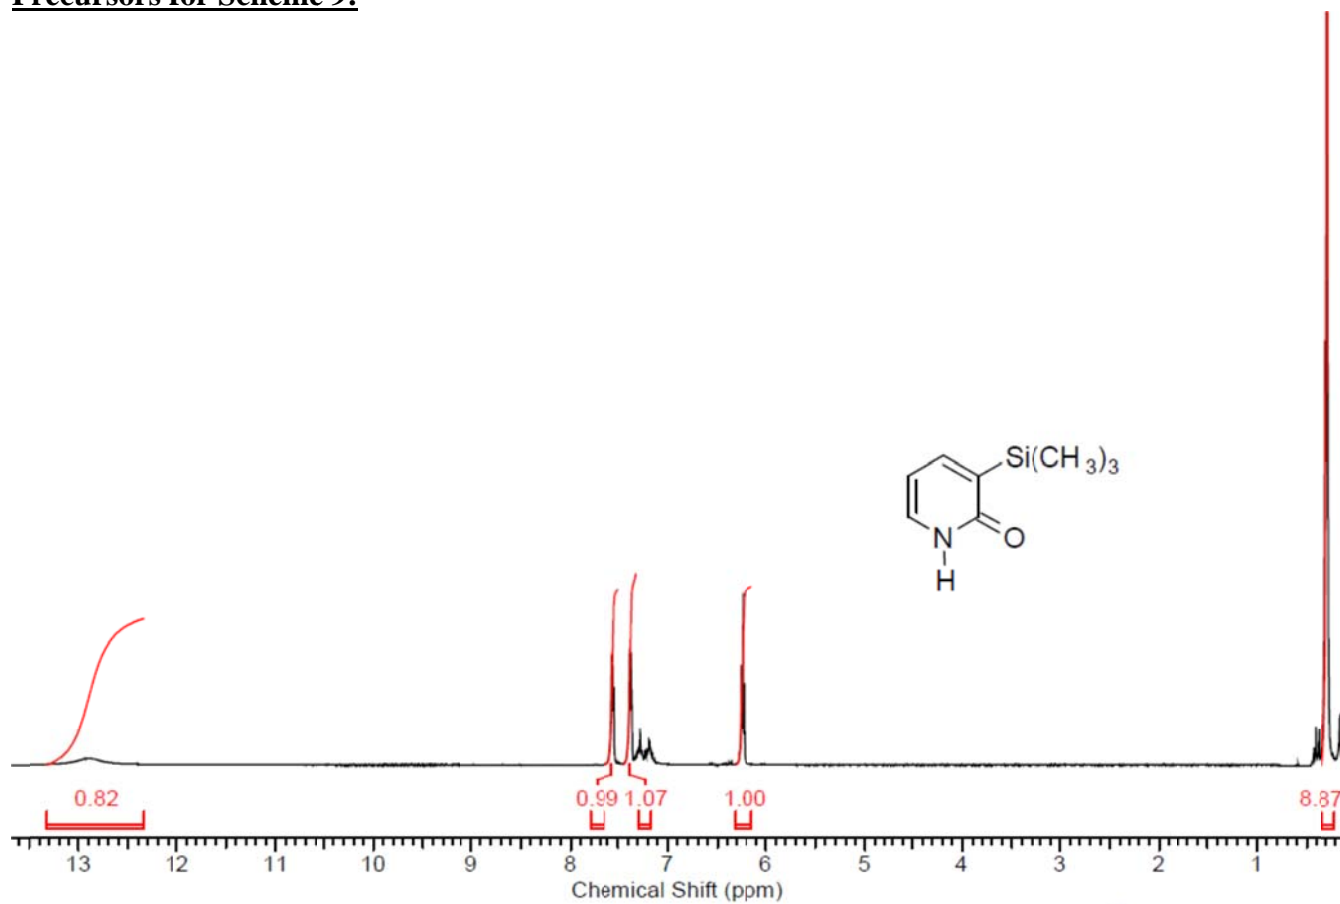

MS PYR.011.001.1R.esp

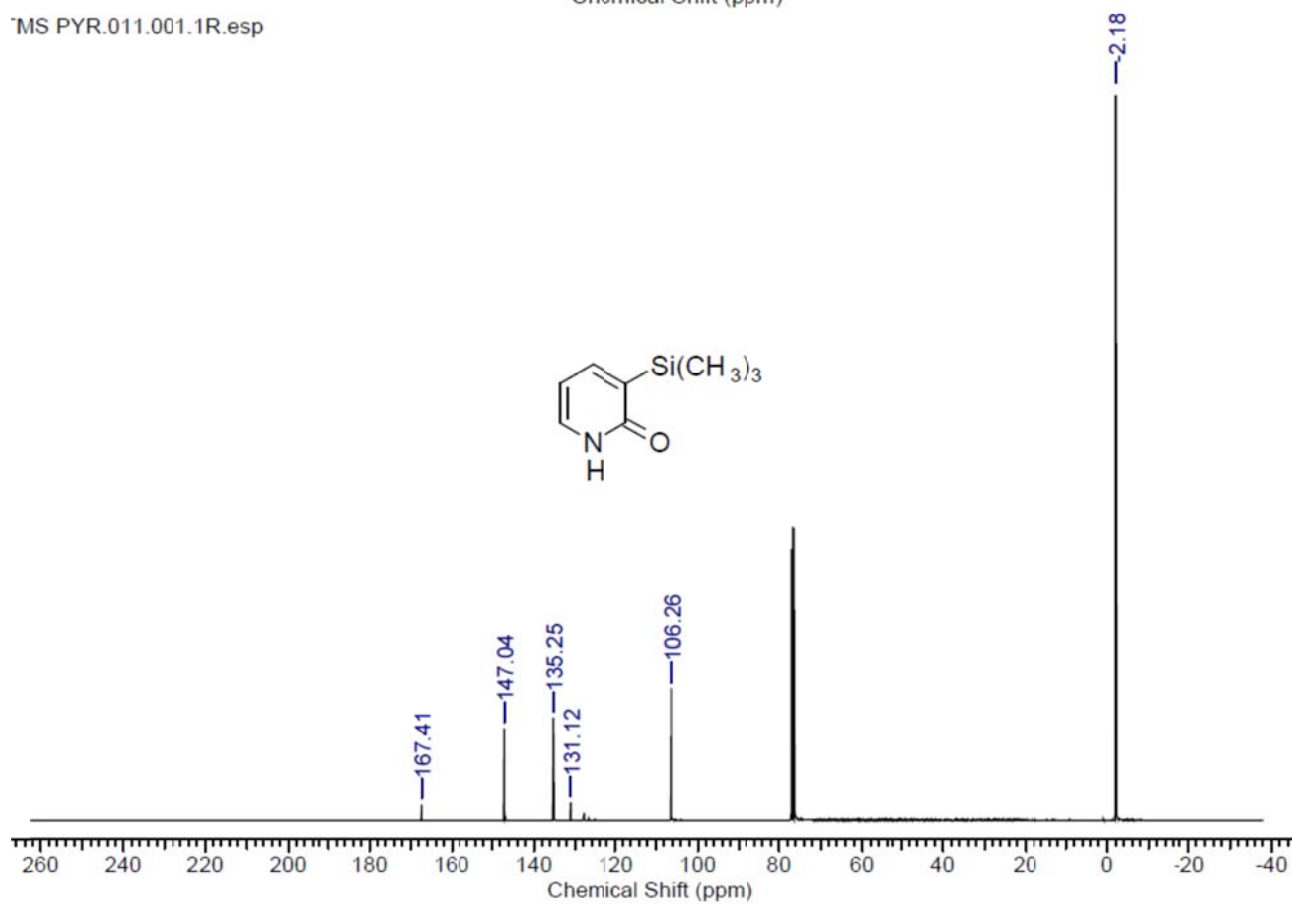

**Compound 12:**

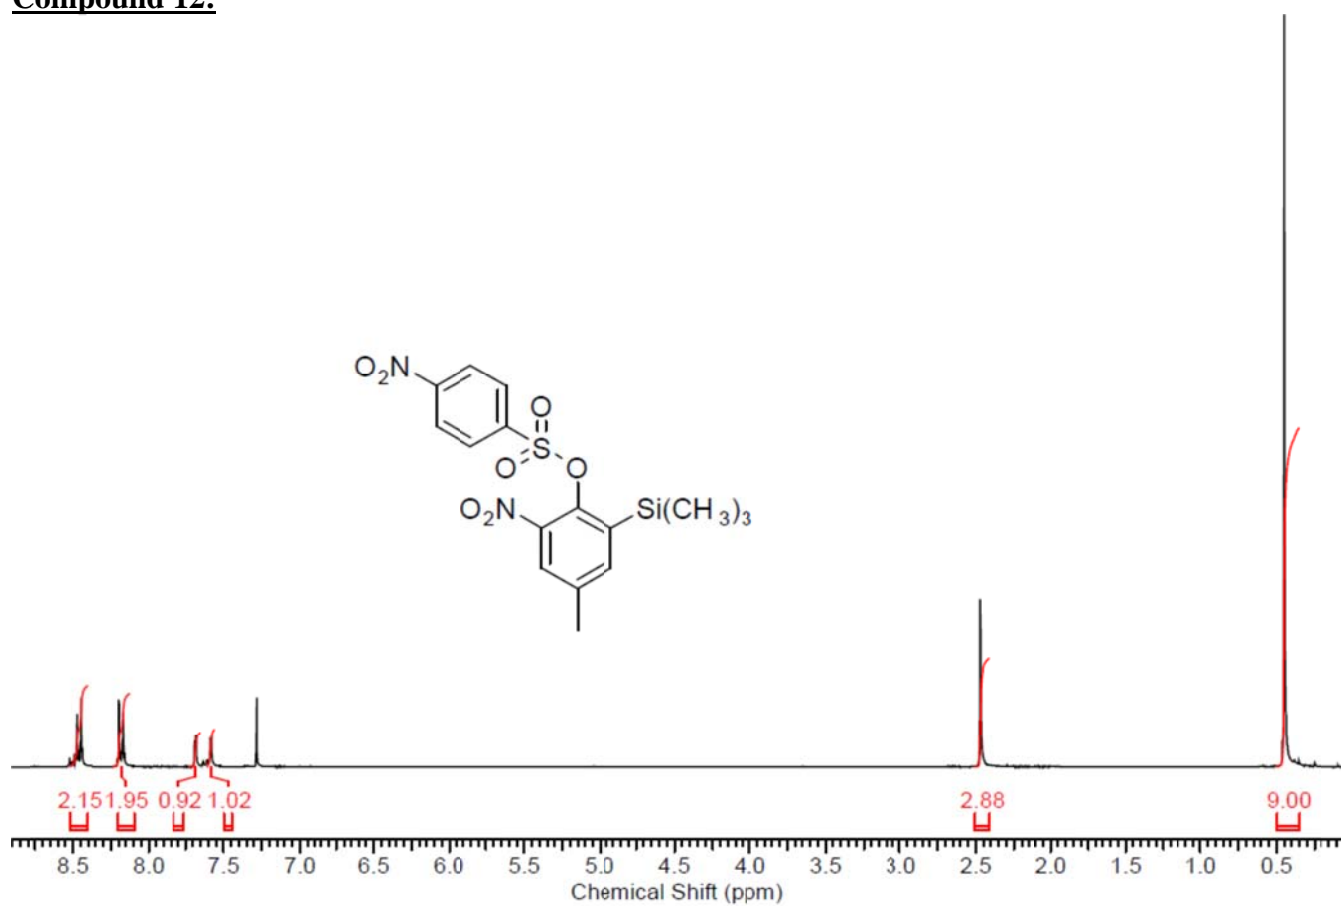

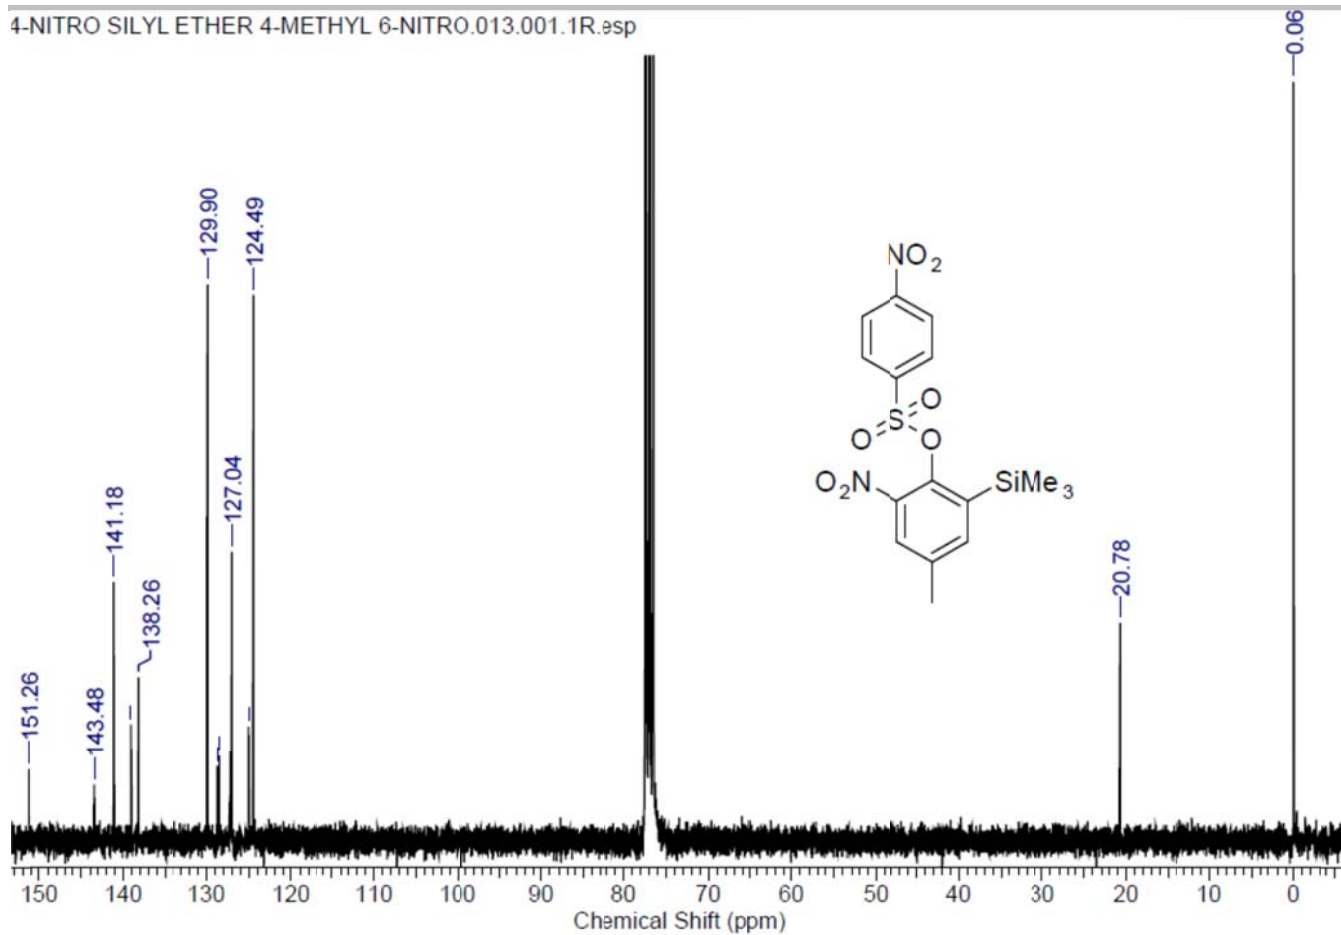

**Compound 13:**

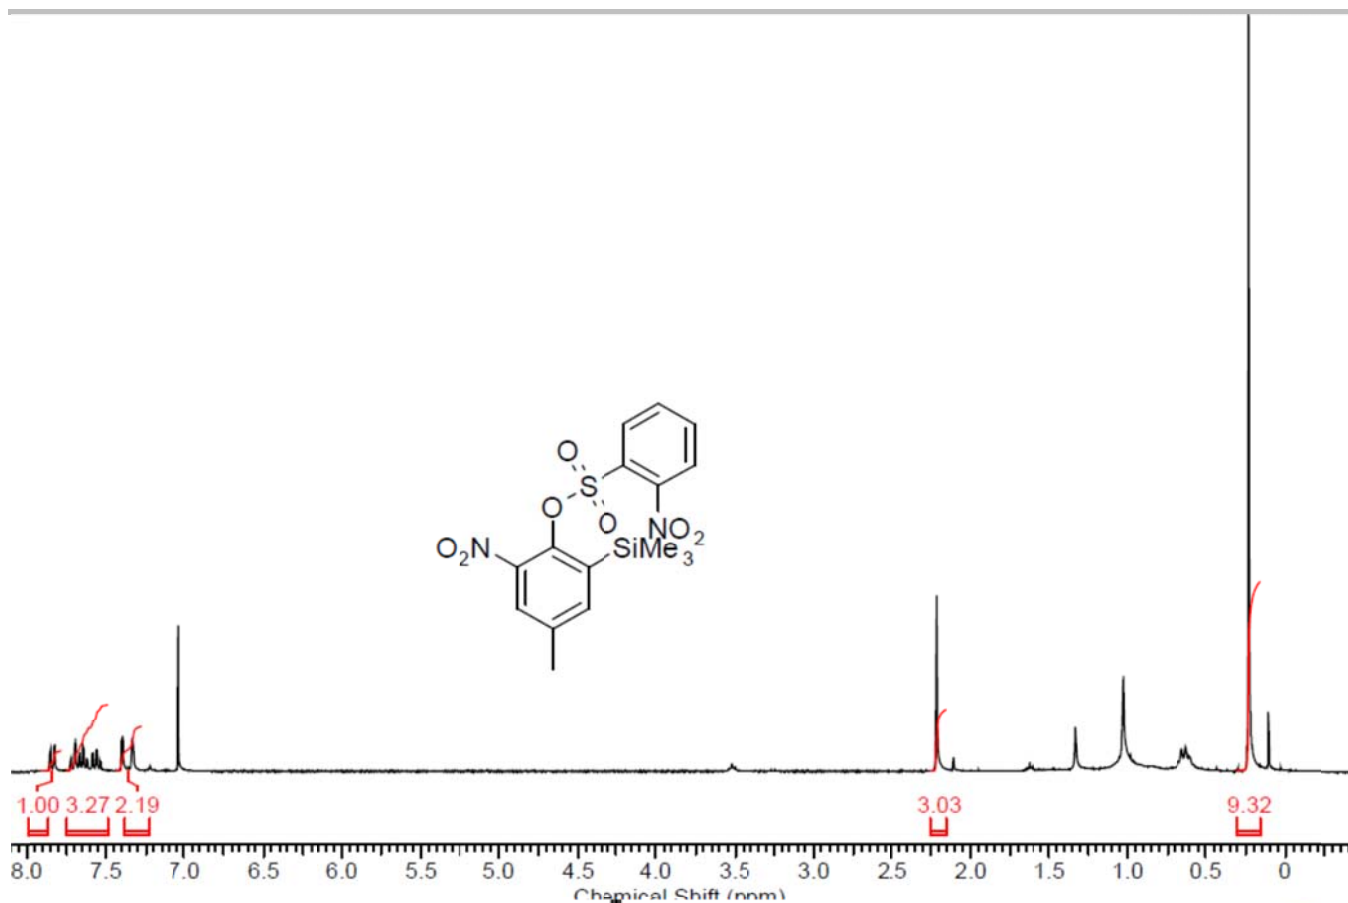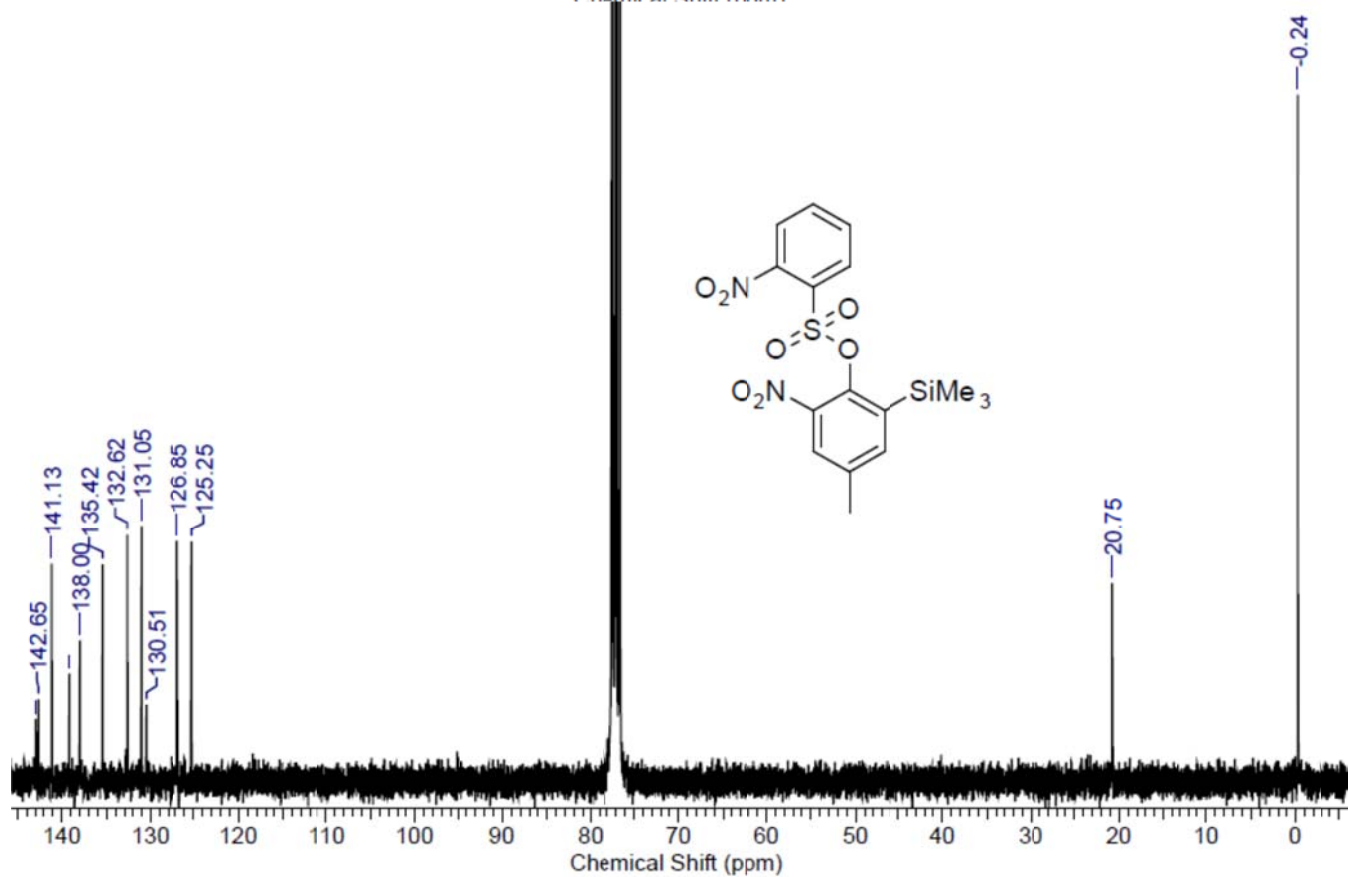

**Compound 14:**

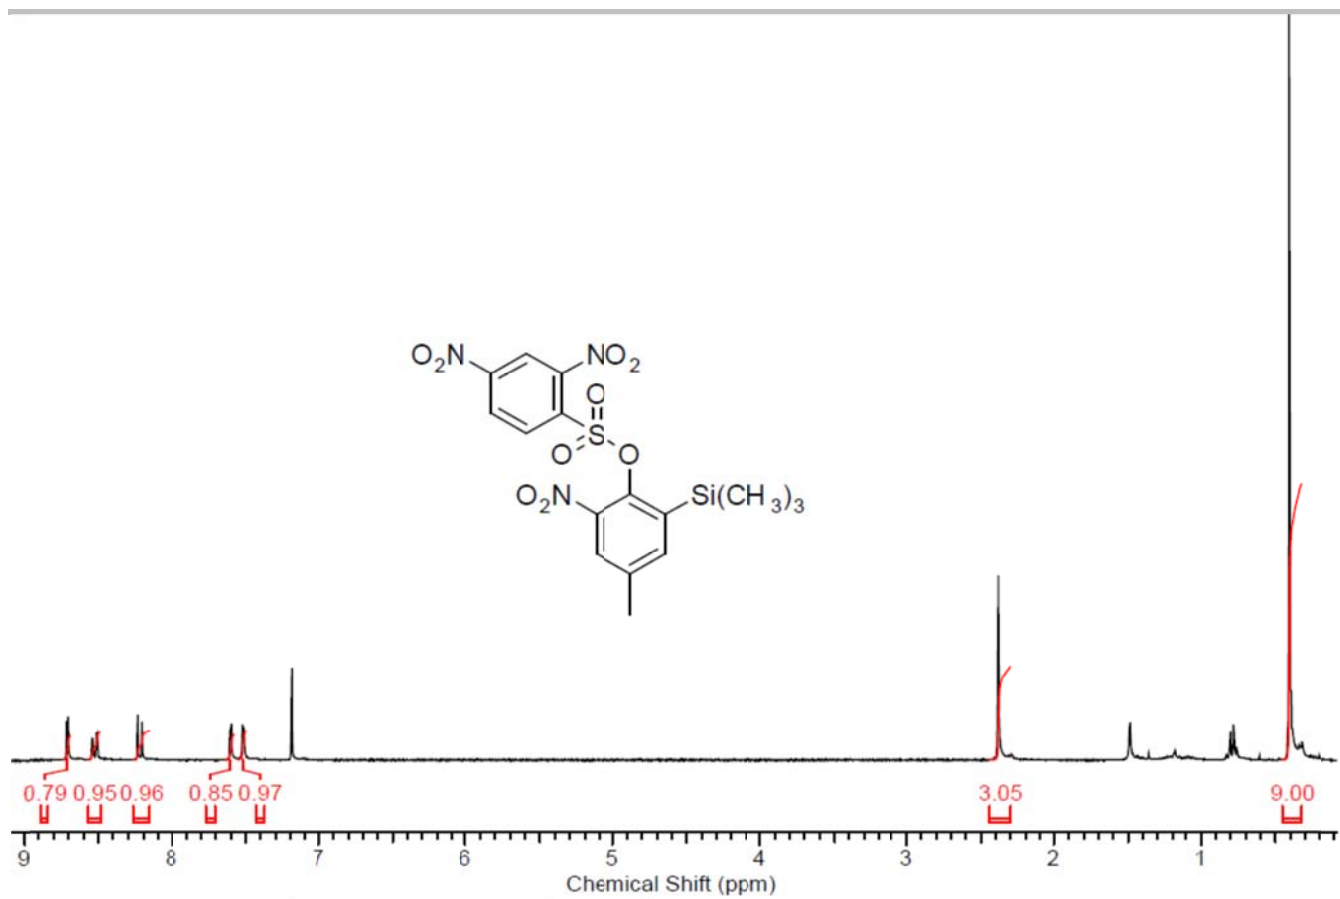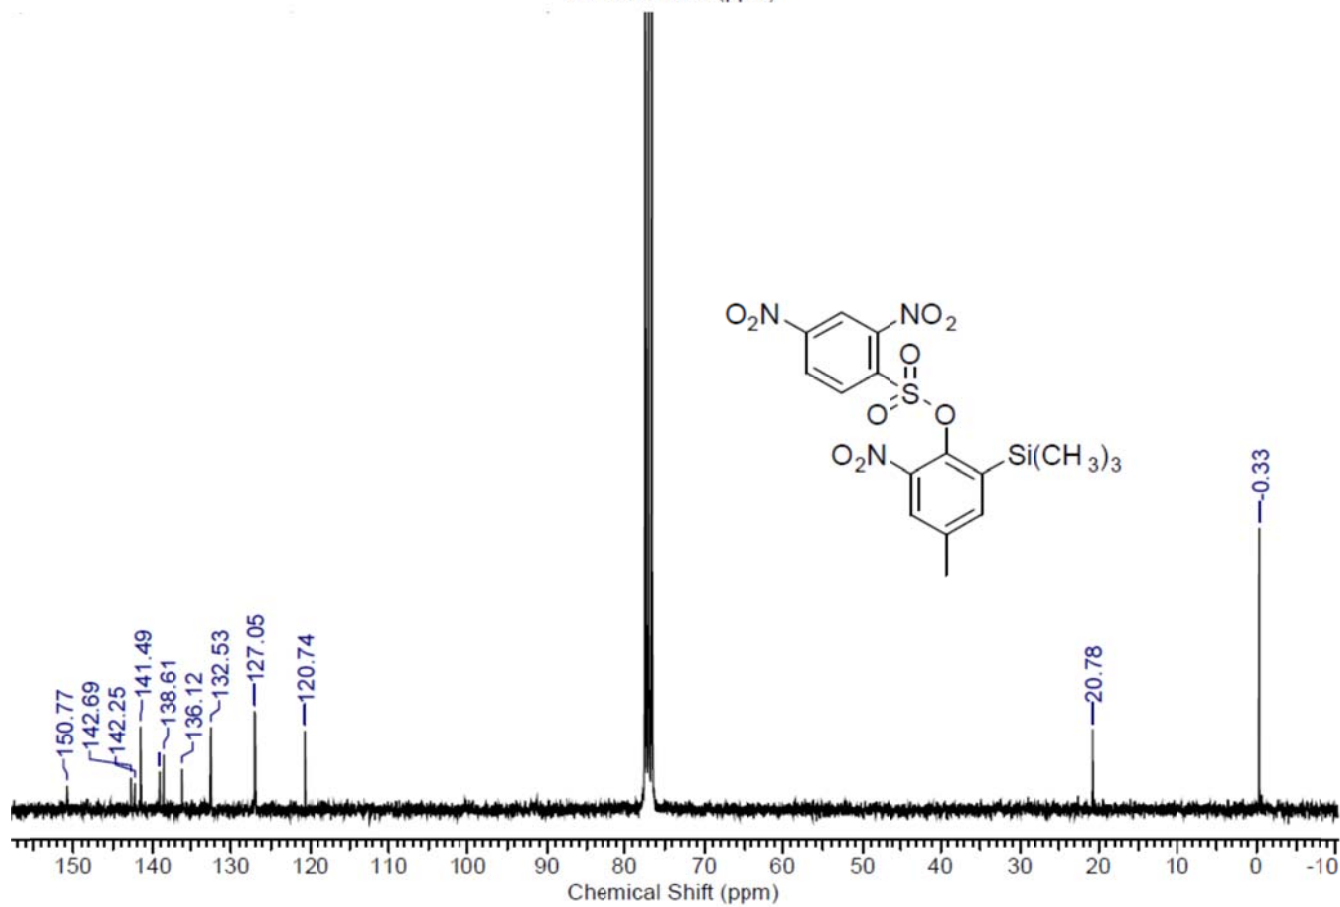

**Compound 39:**

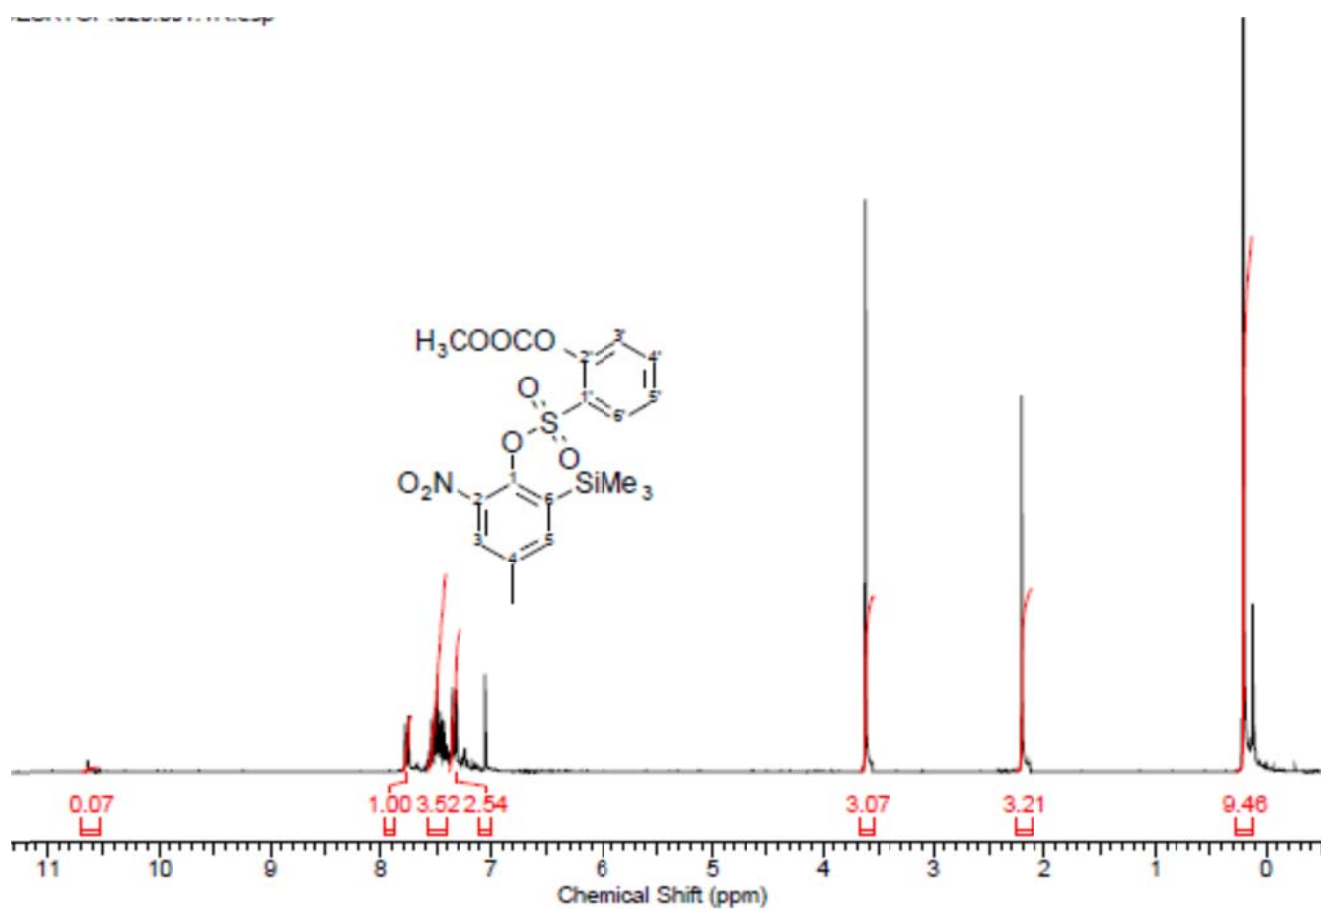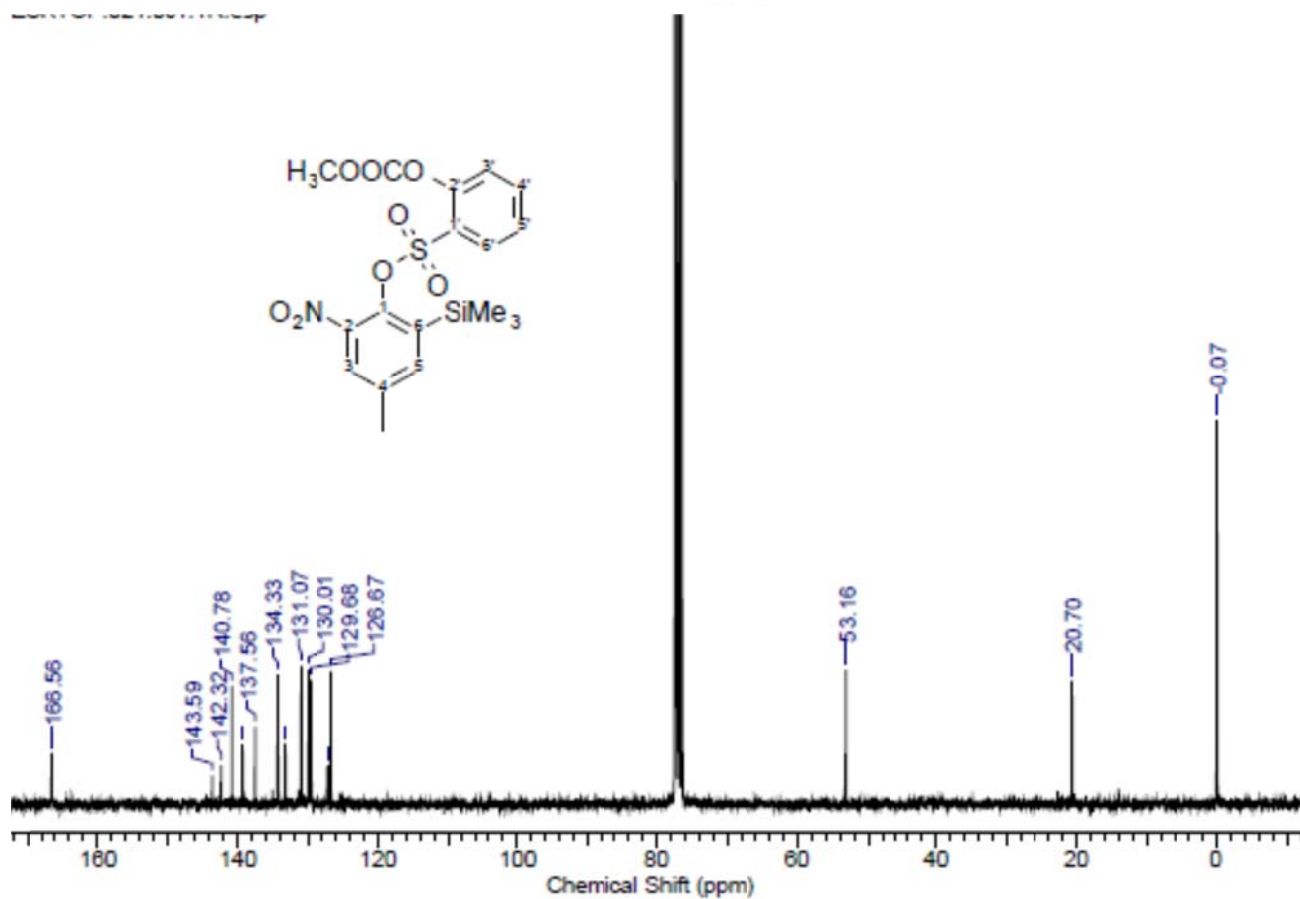

**Compound 36:**

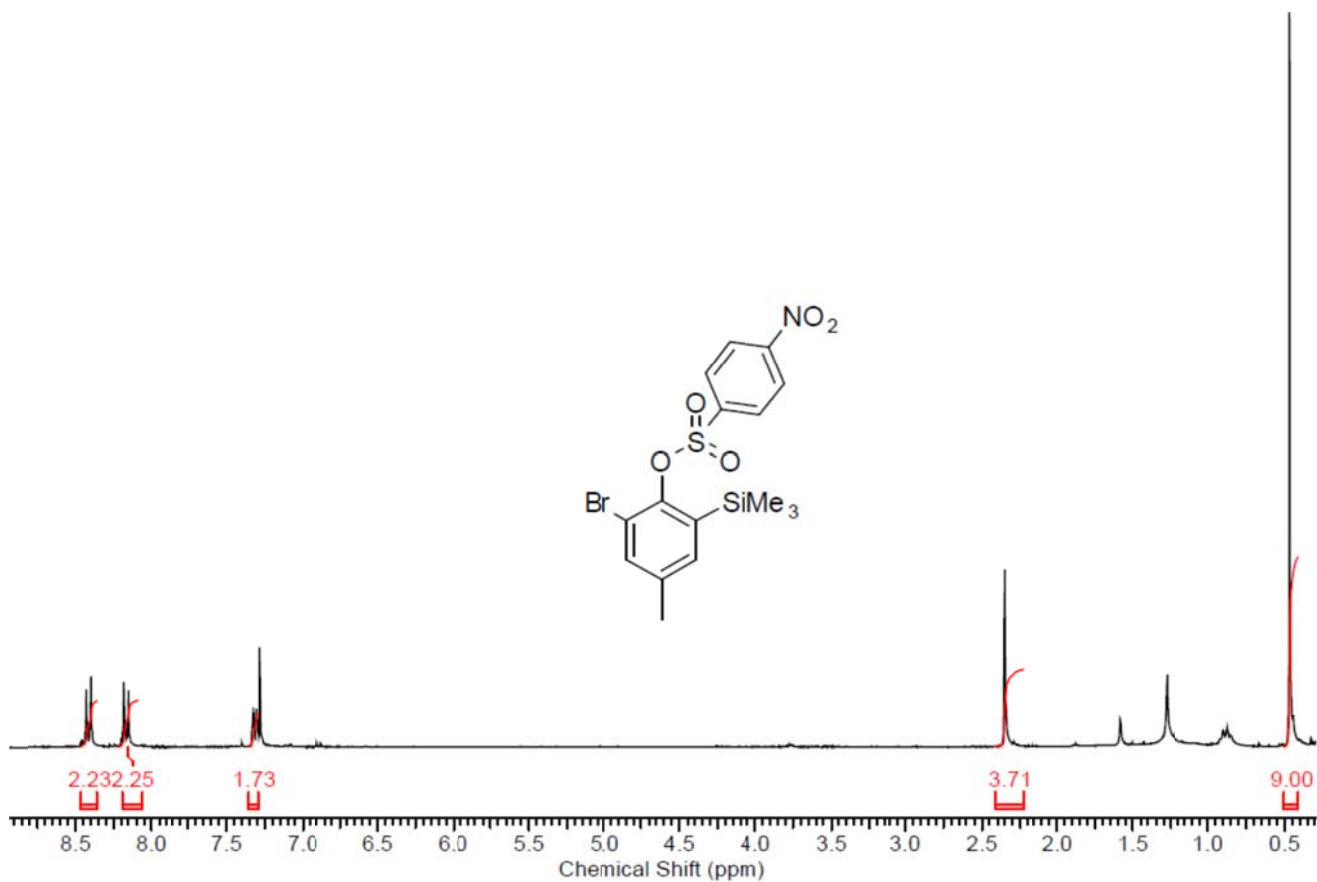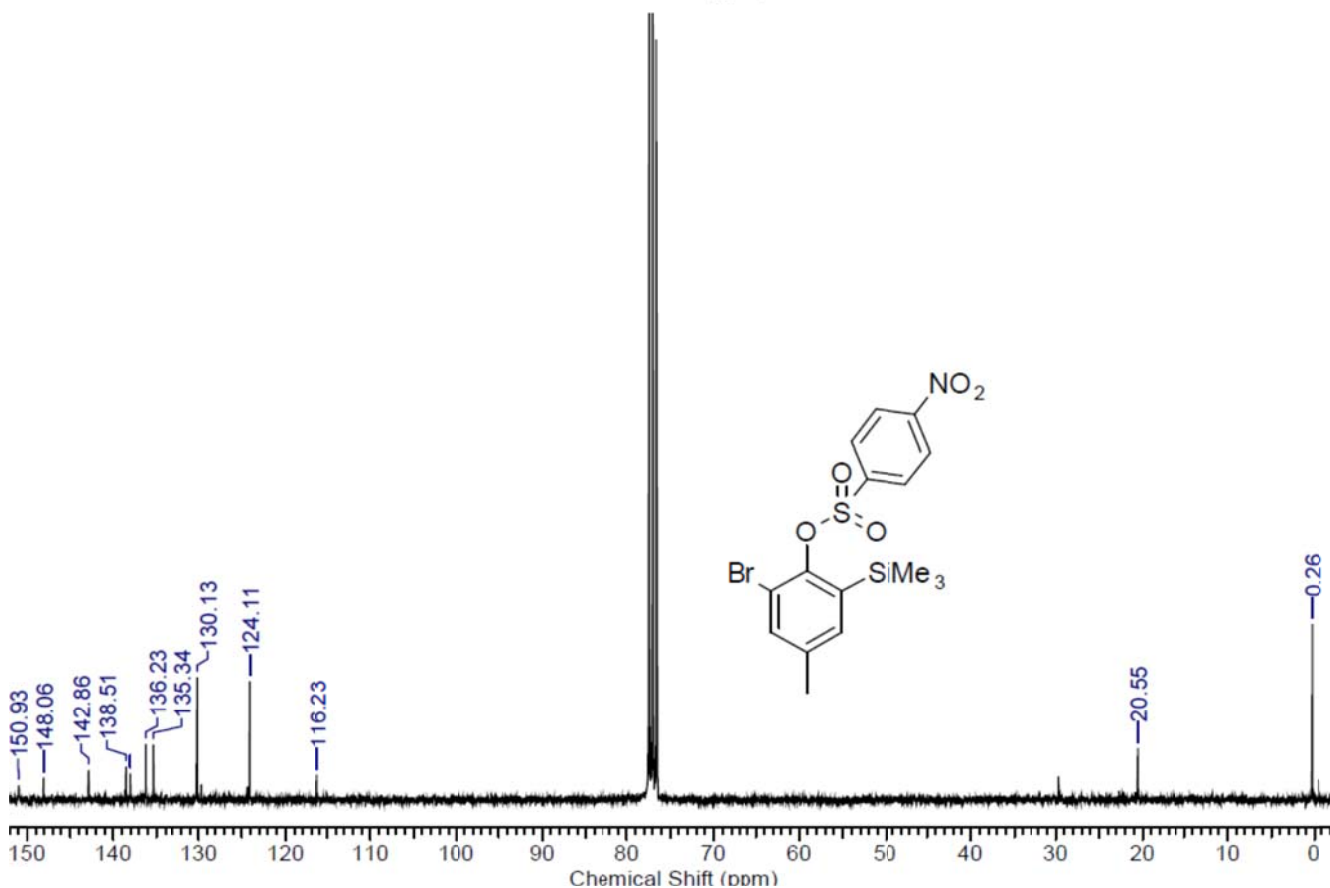



**Compound 37:**

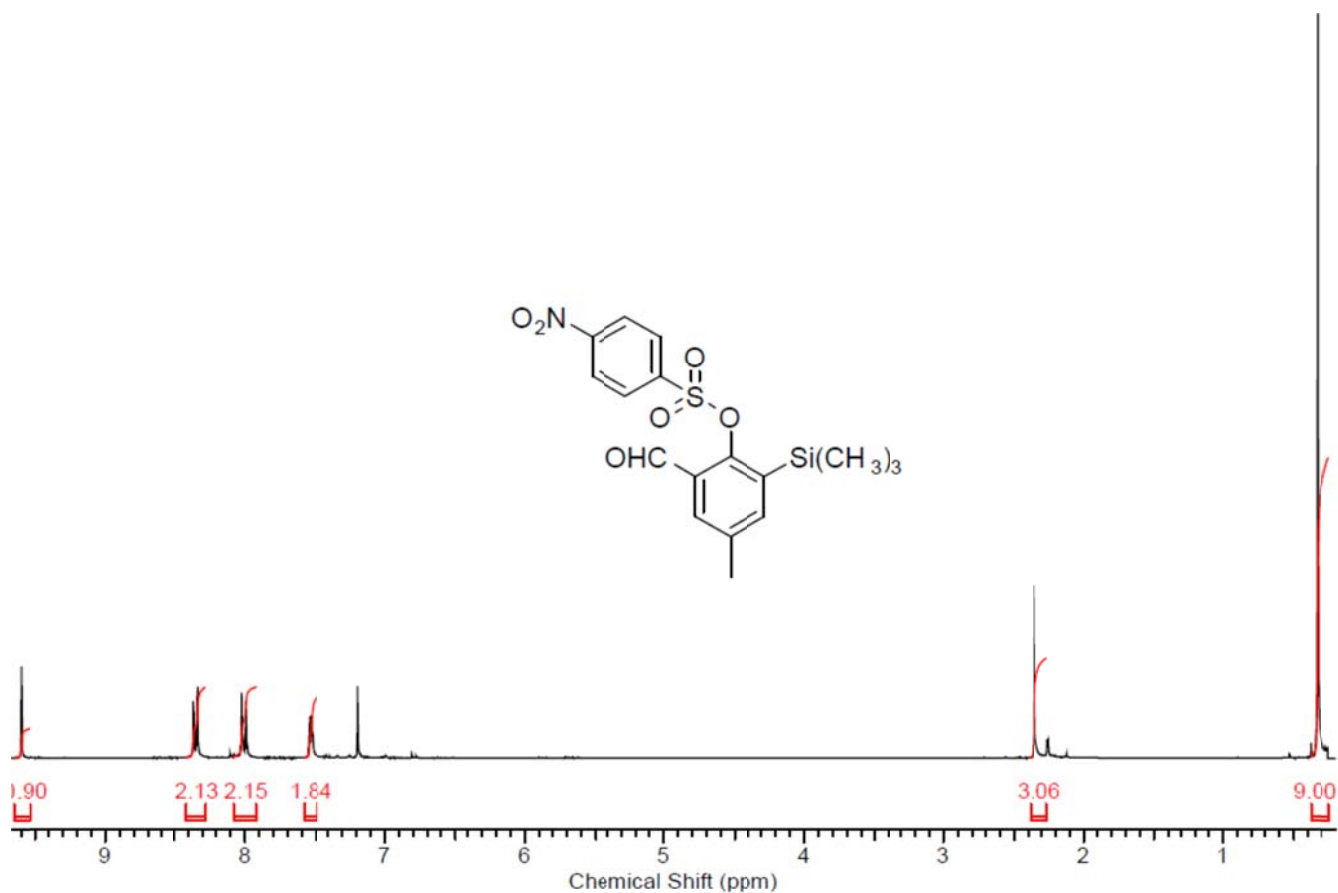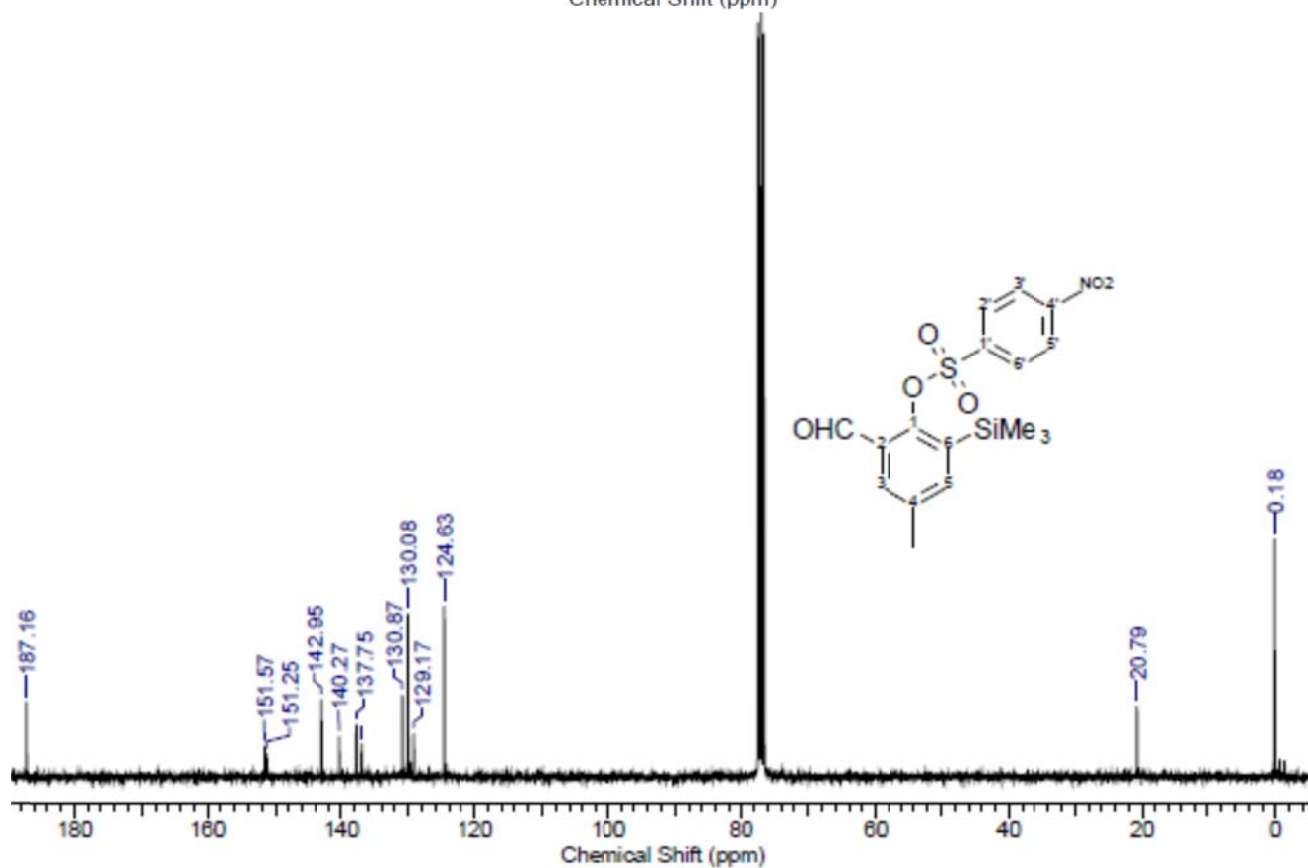

**Compound 38:**

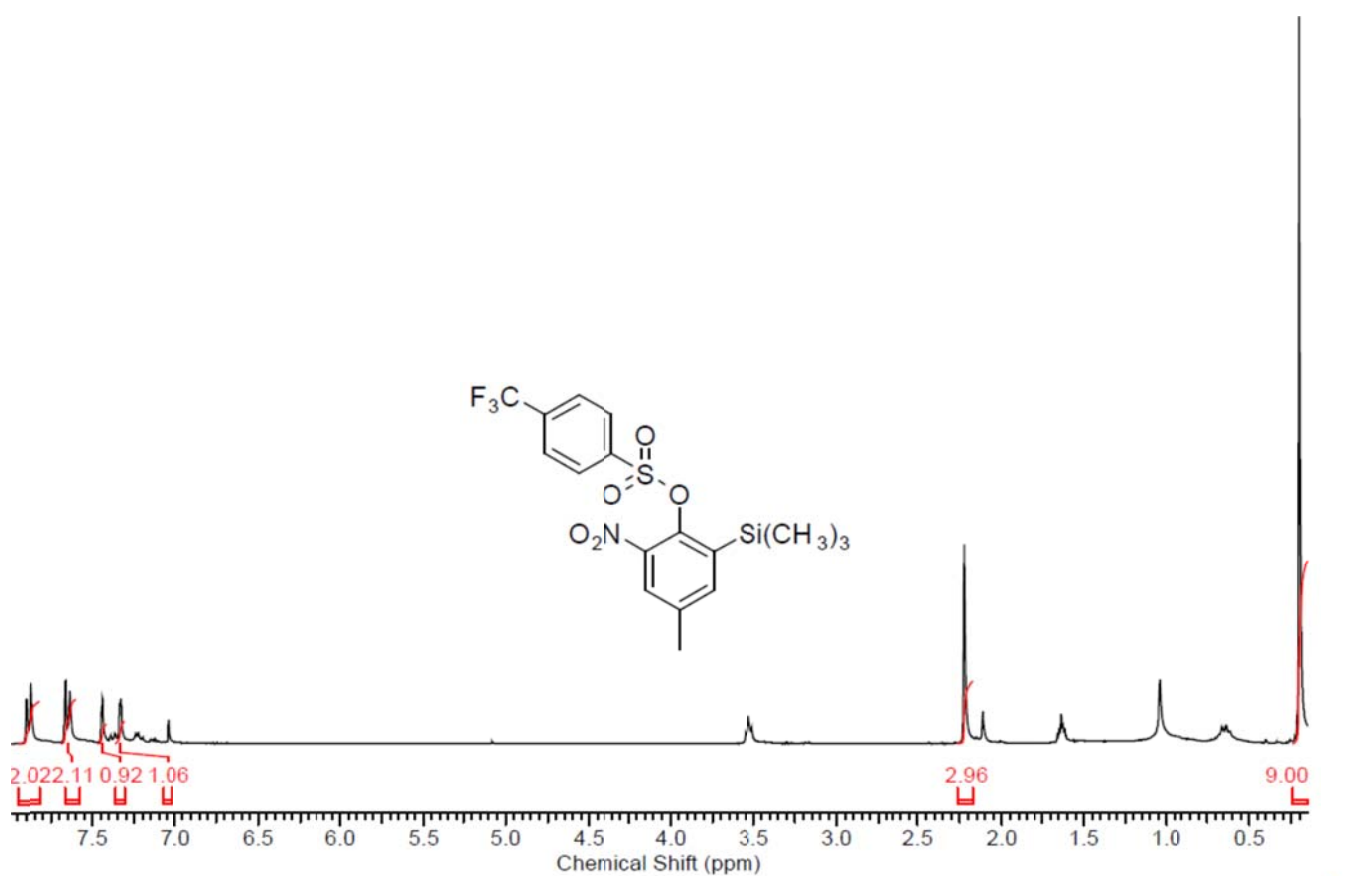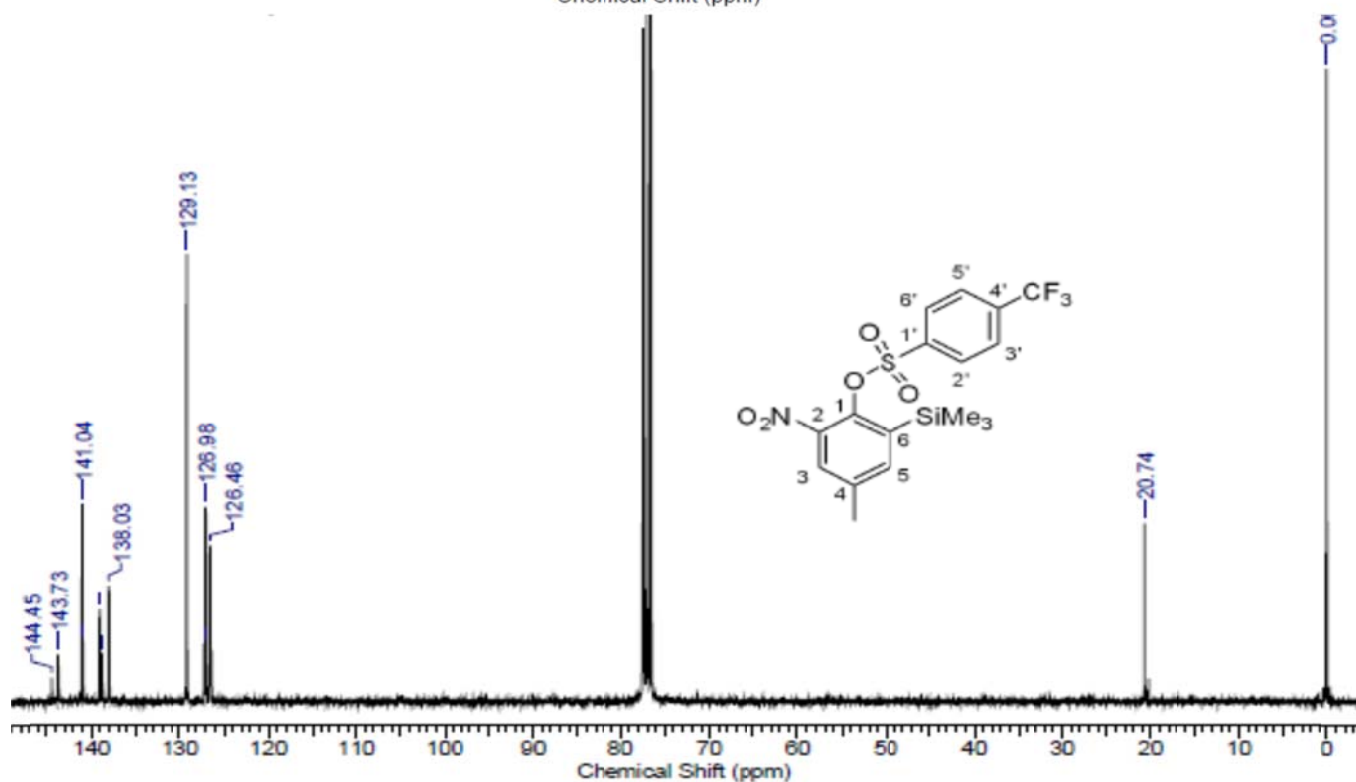

**Compound 40:**

T3-05-07-PAQ49.010.001.1K.esp

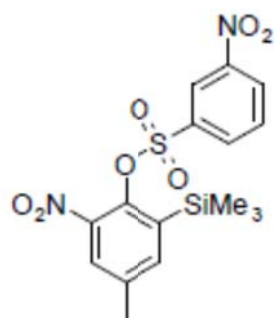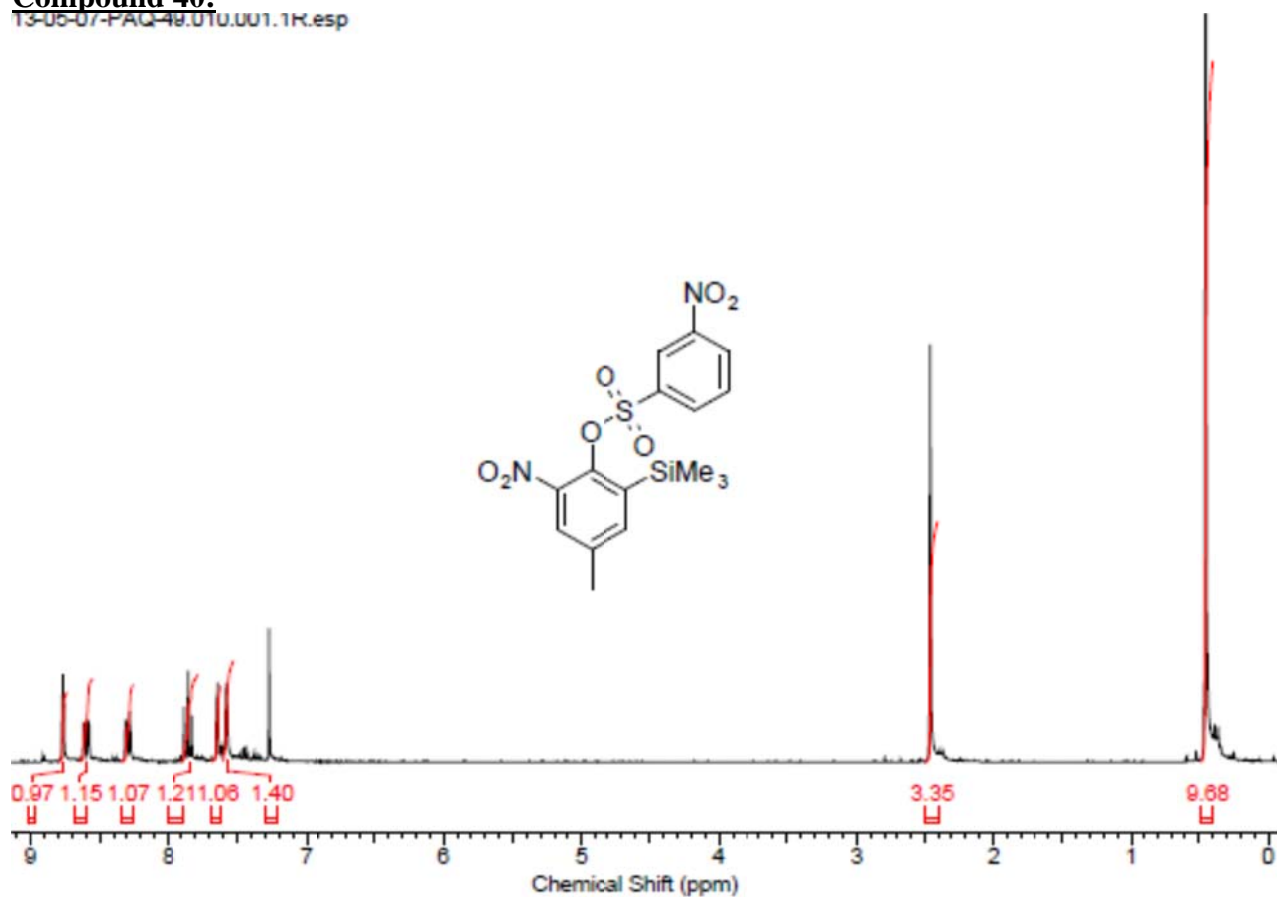

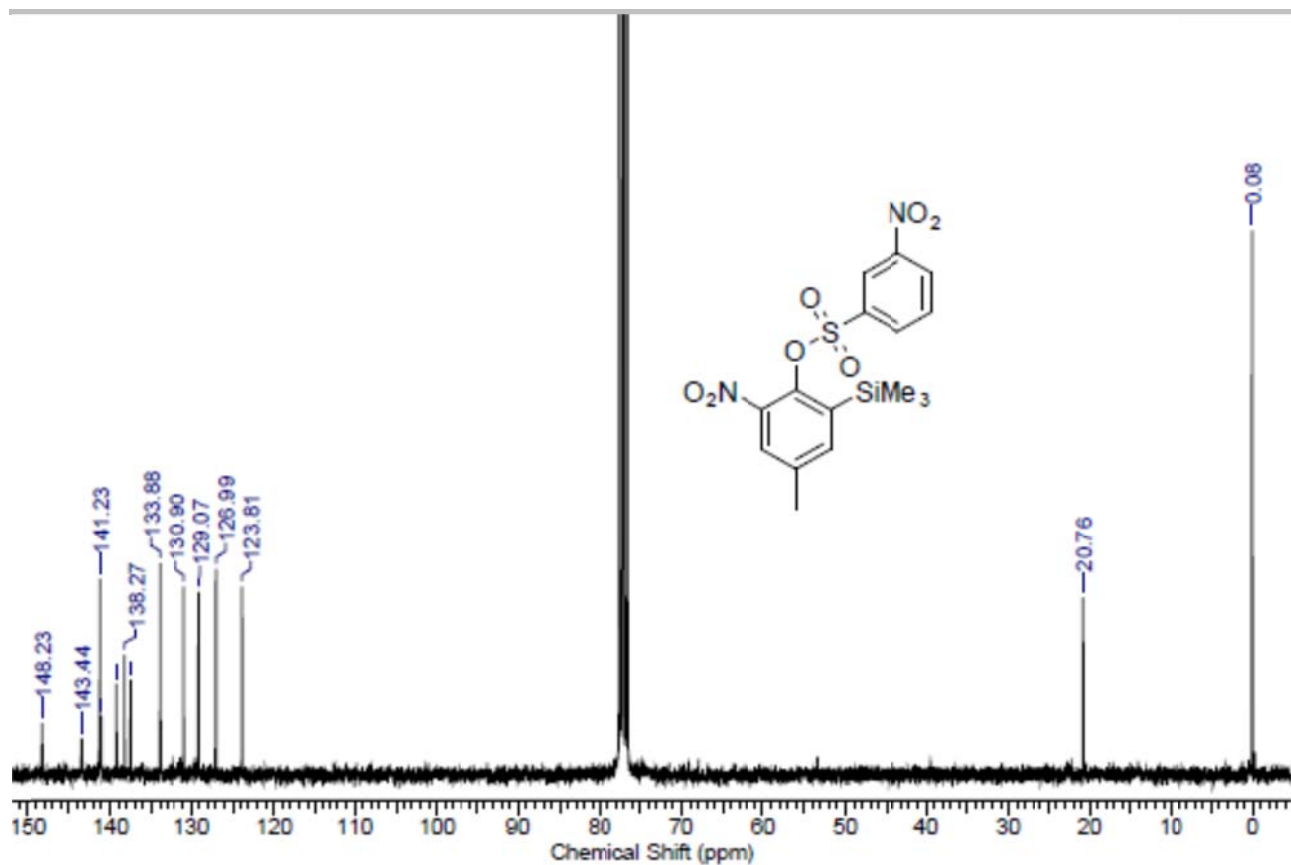

**Compound 22:**

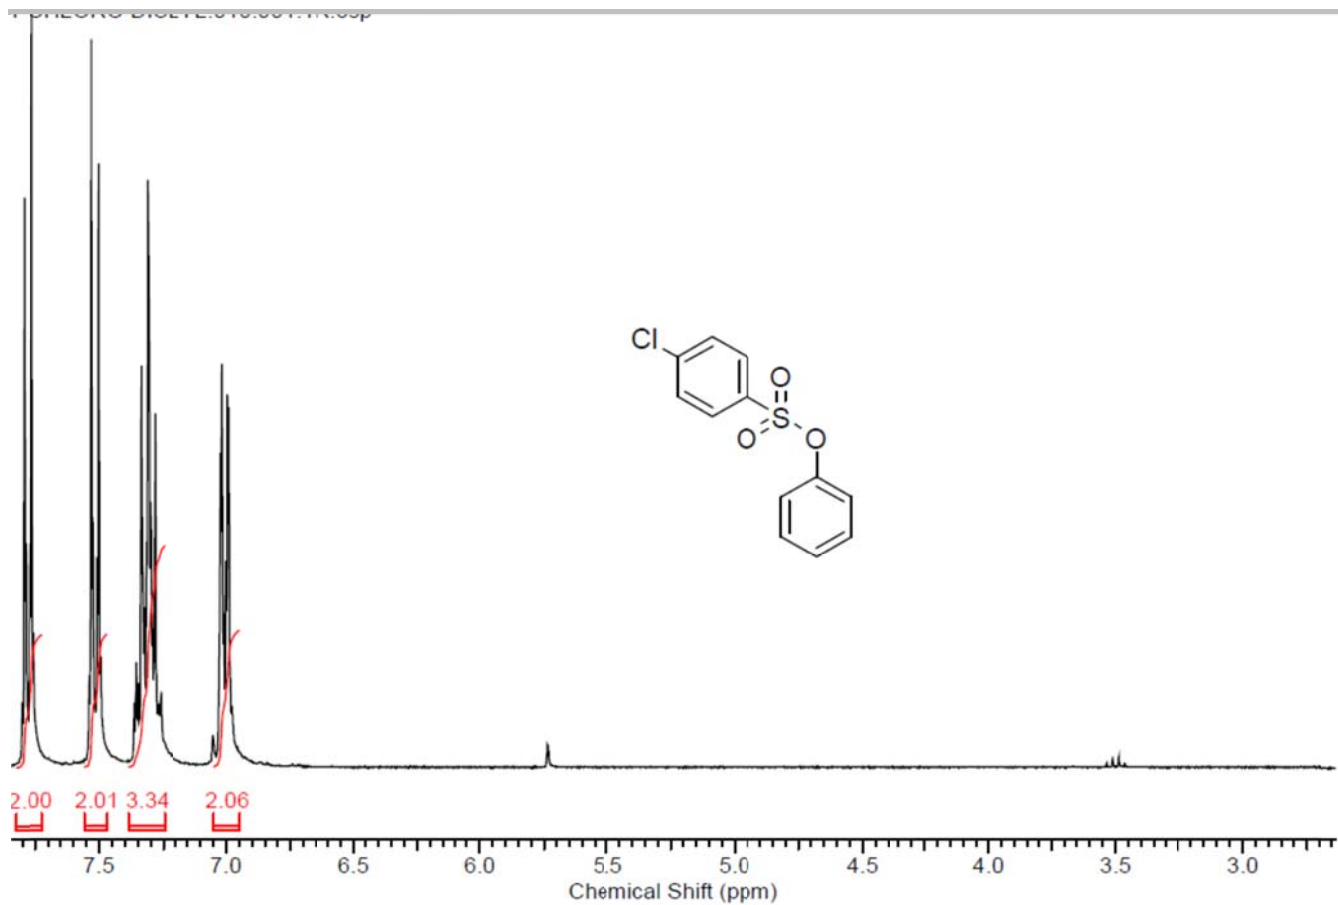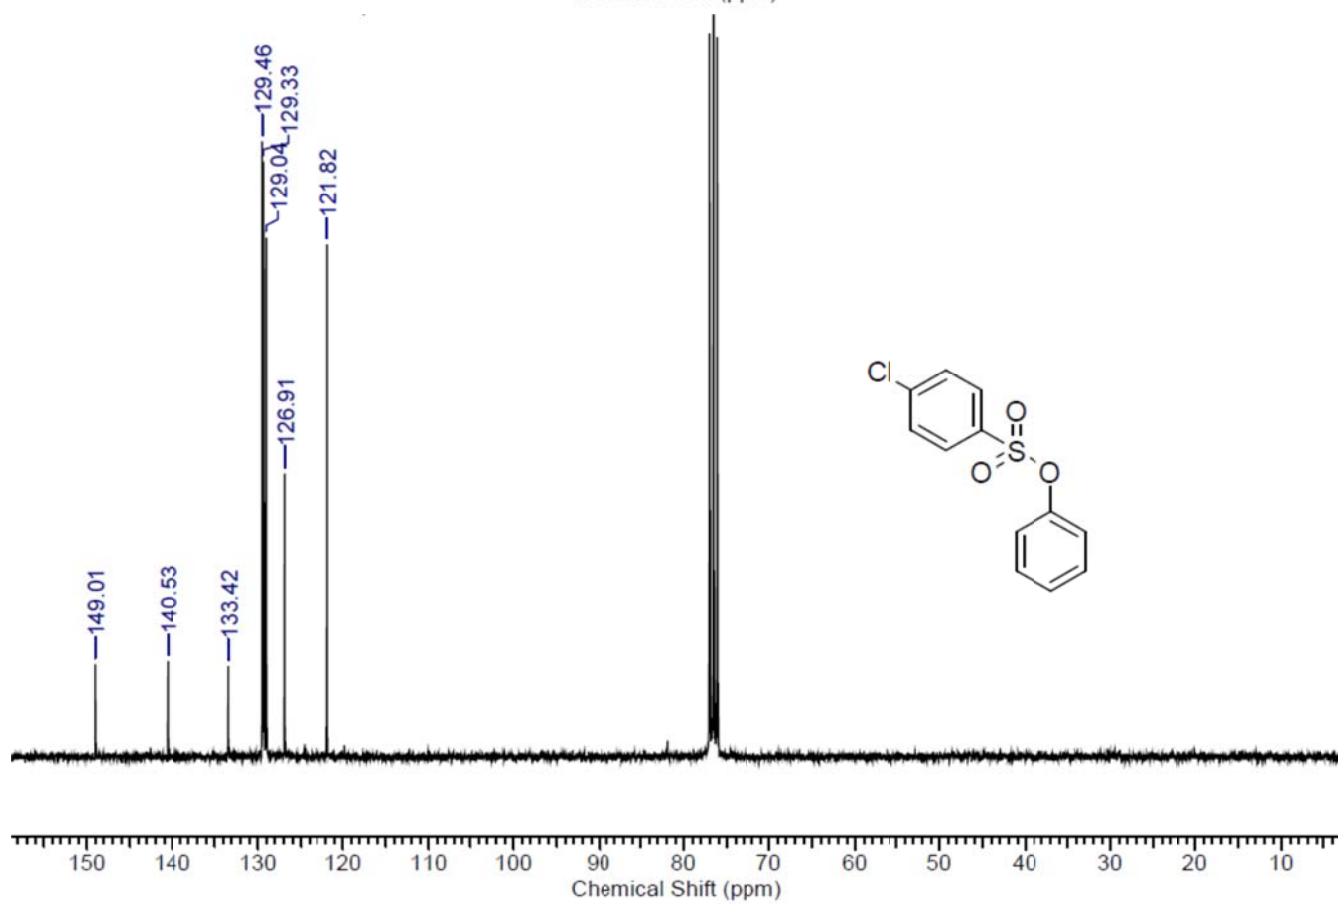

**Compound 23:**

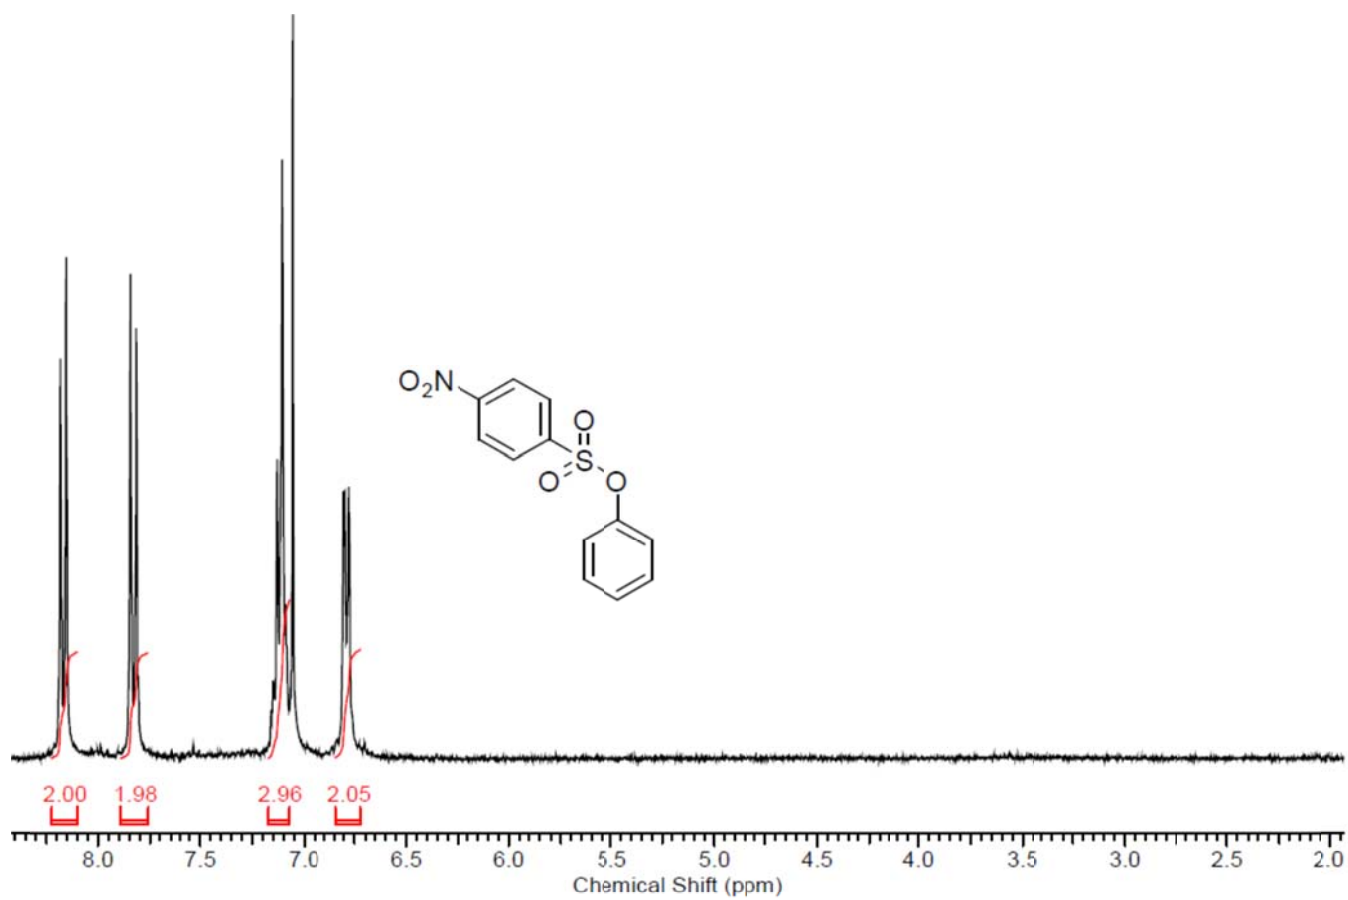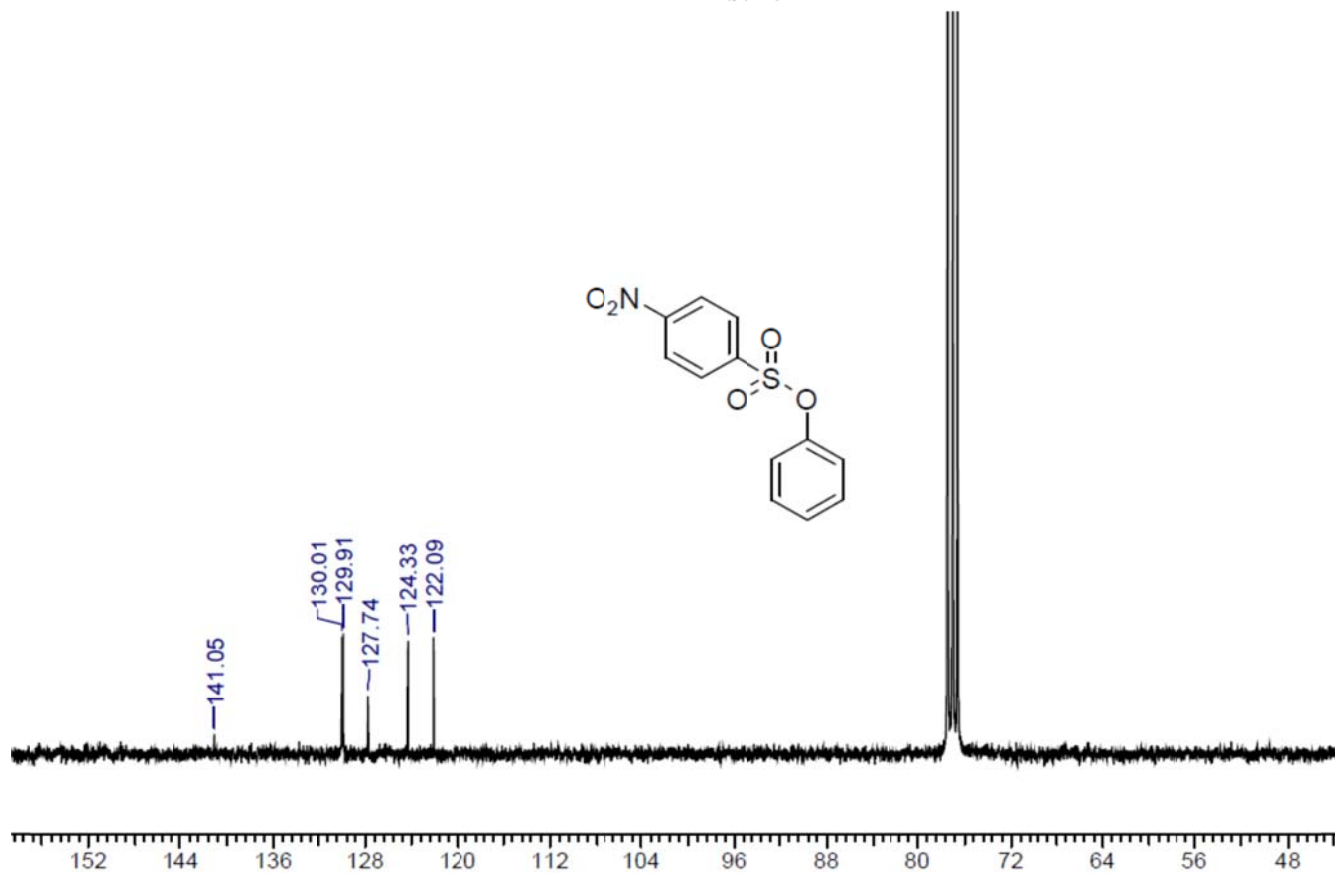

**Compound 34:**

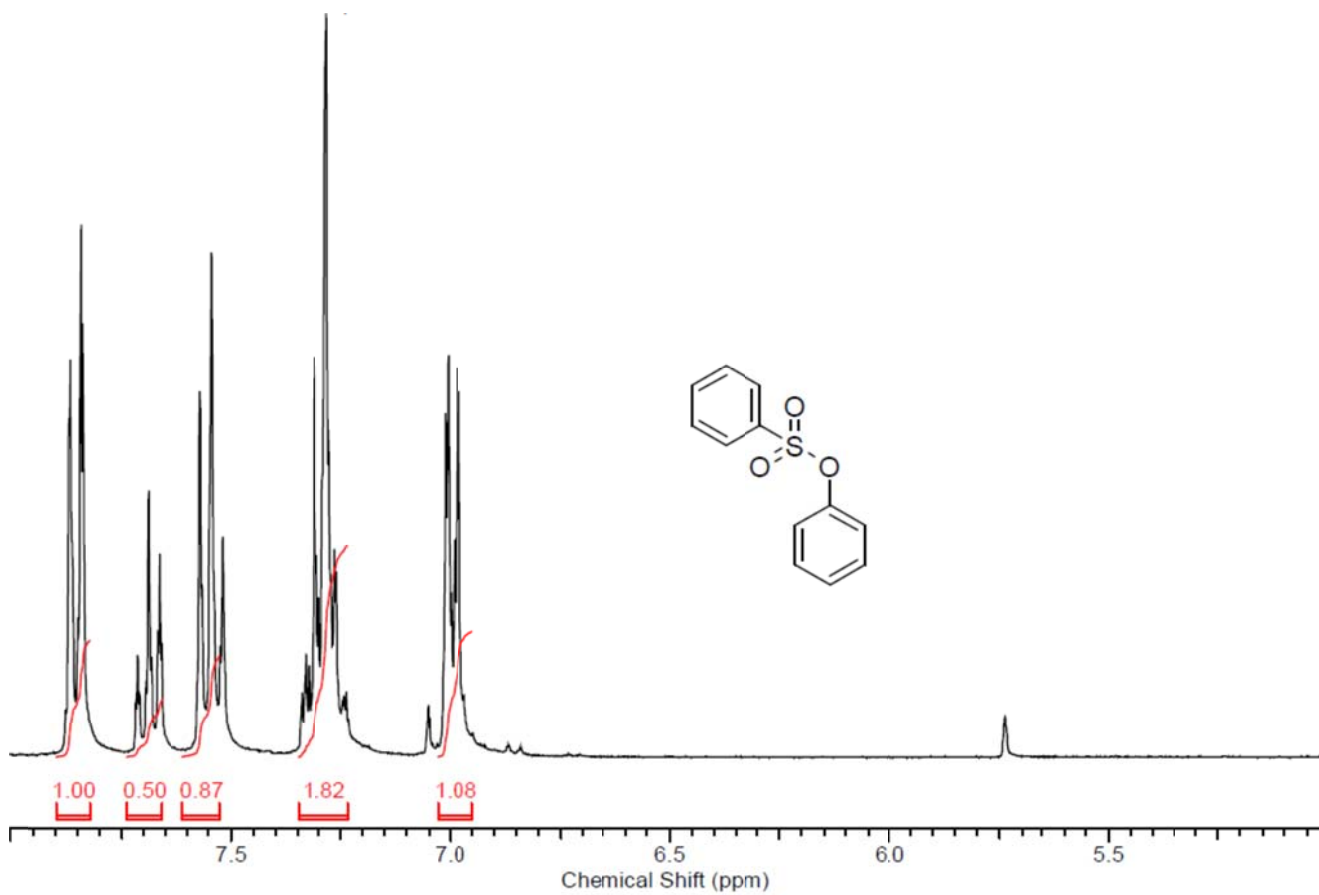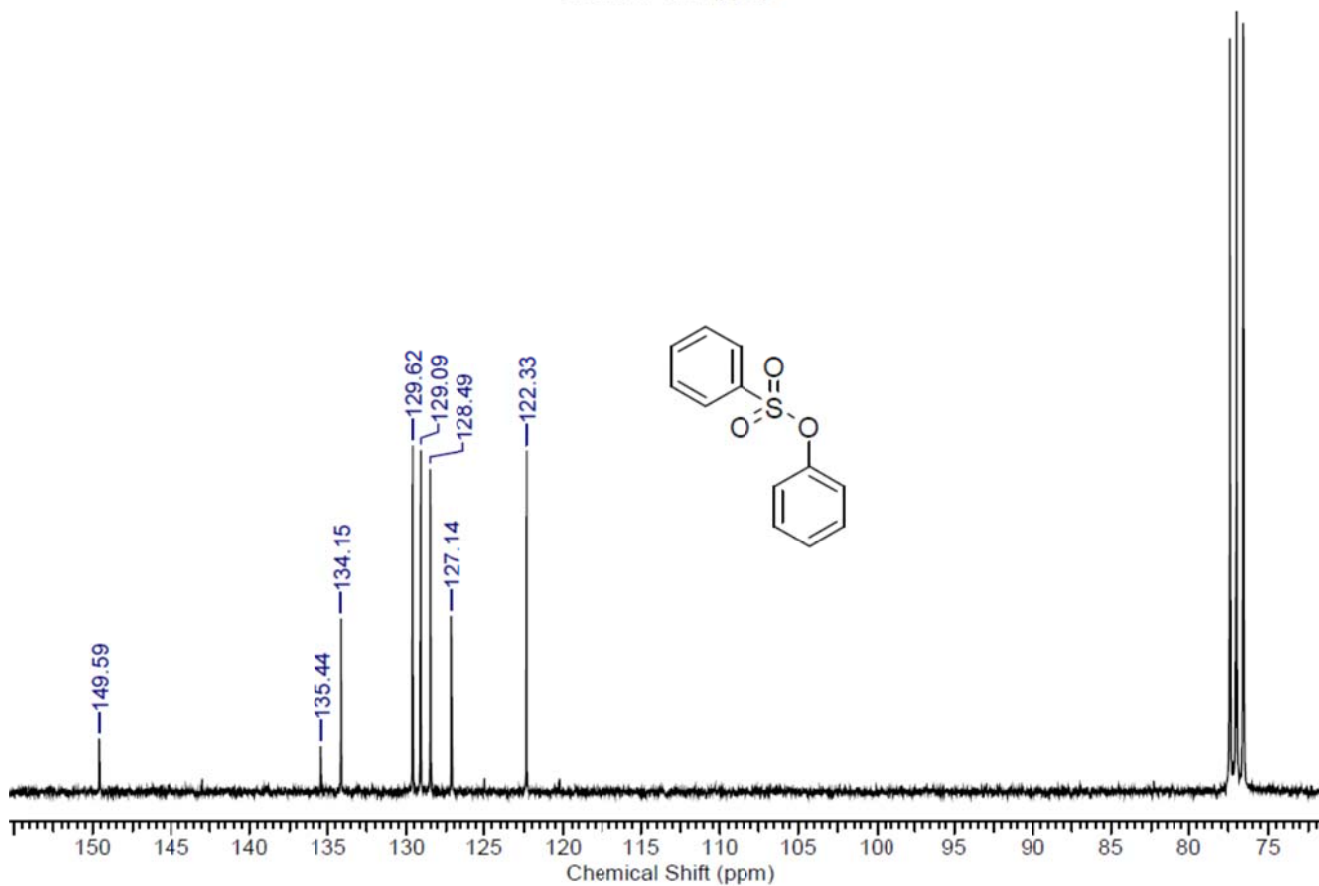

**Compound 35:**

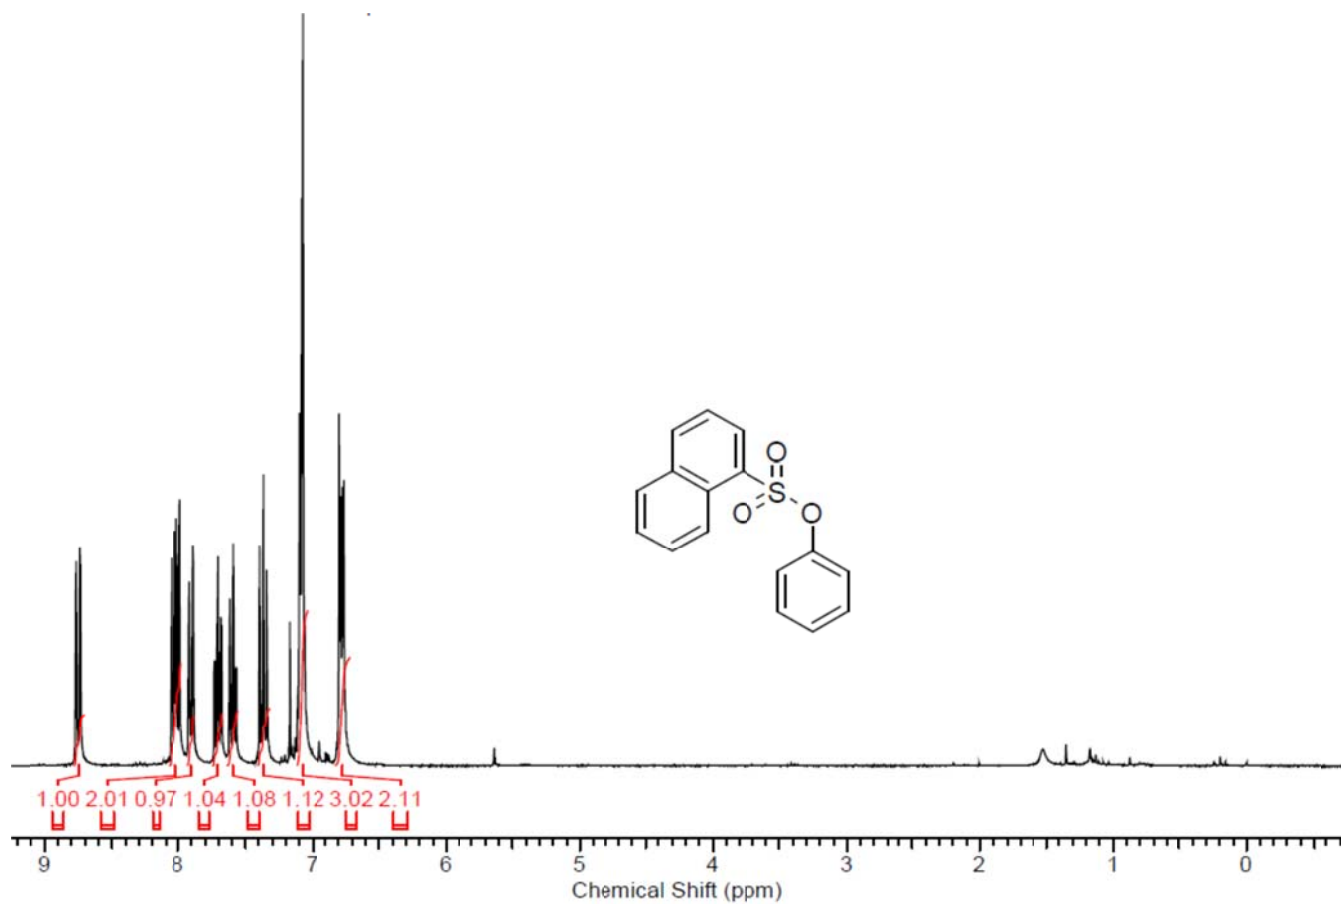



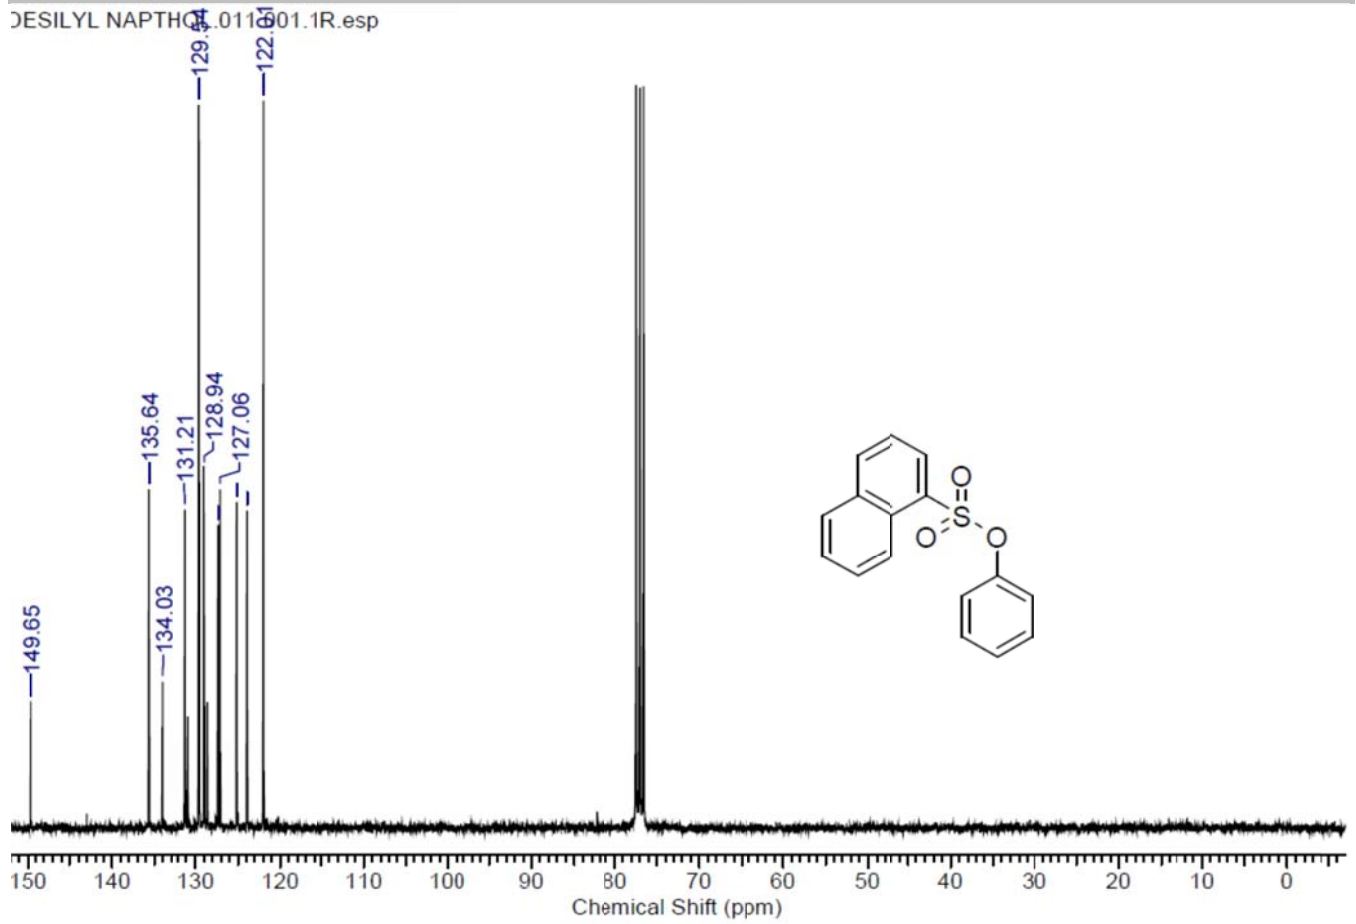

**Compound 7:**

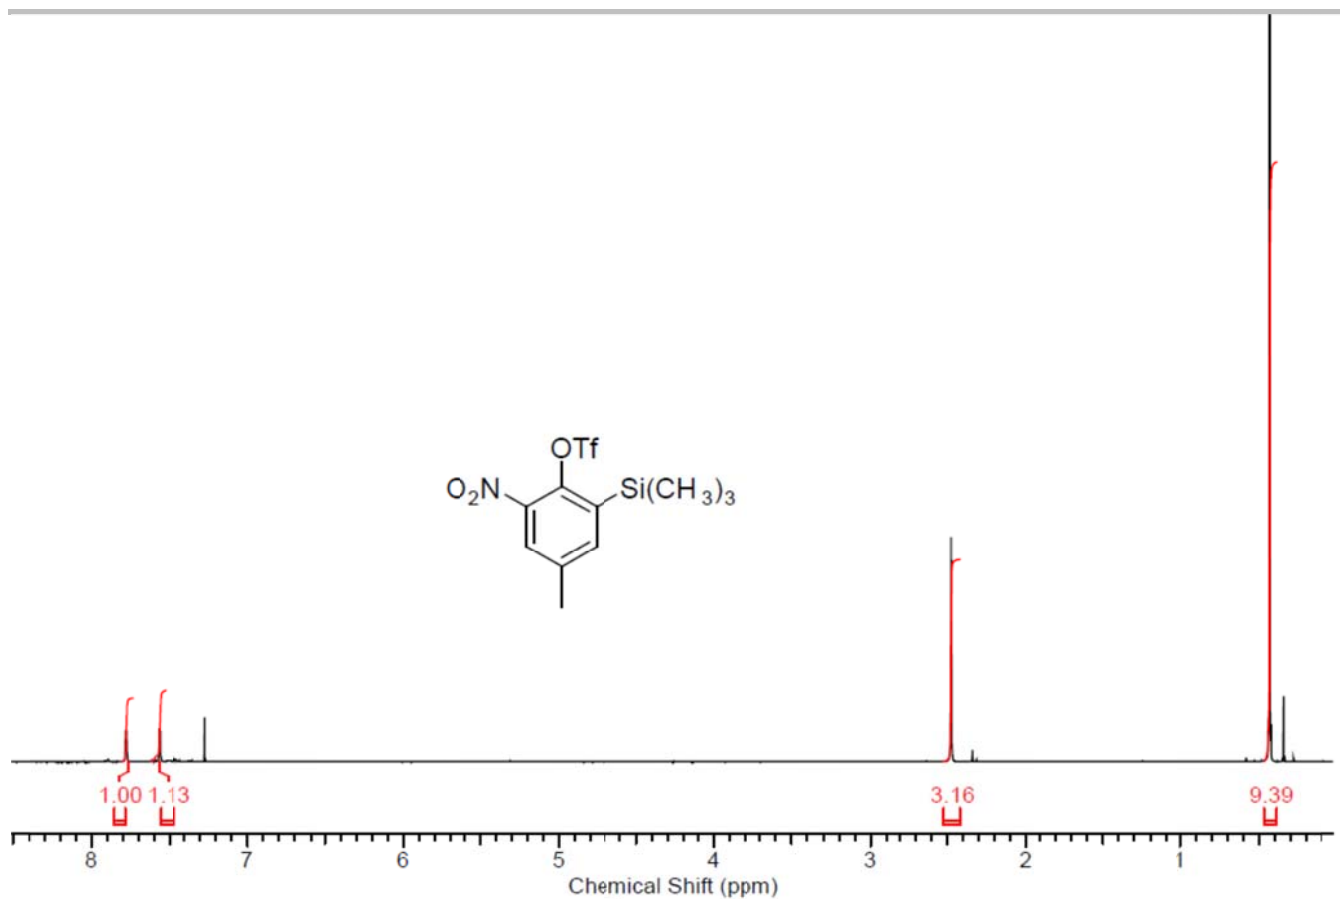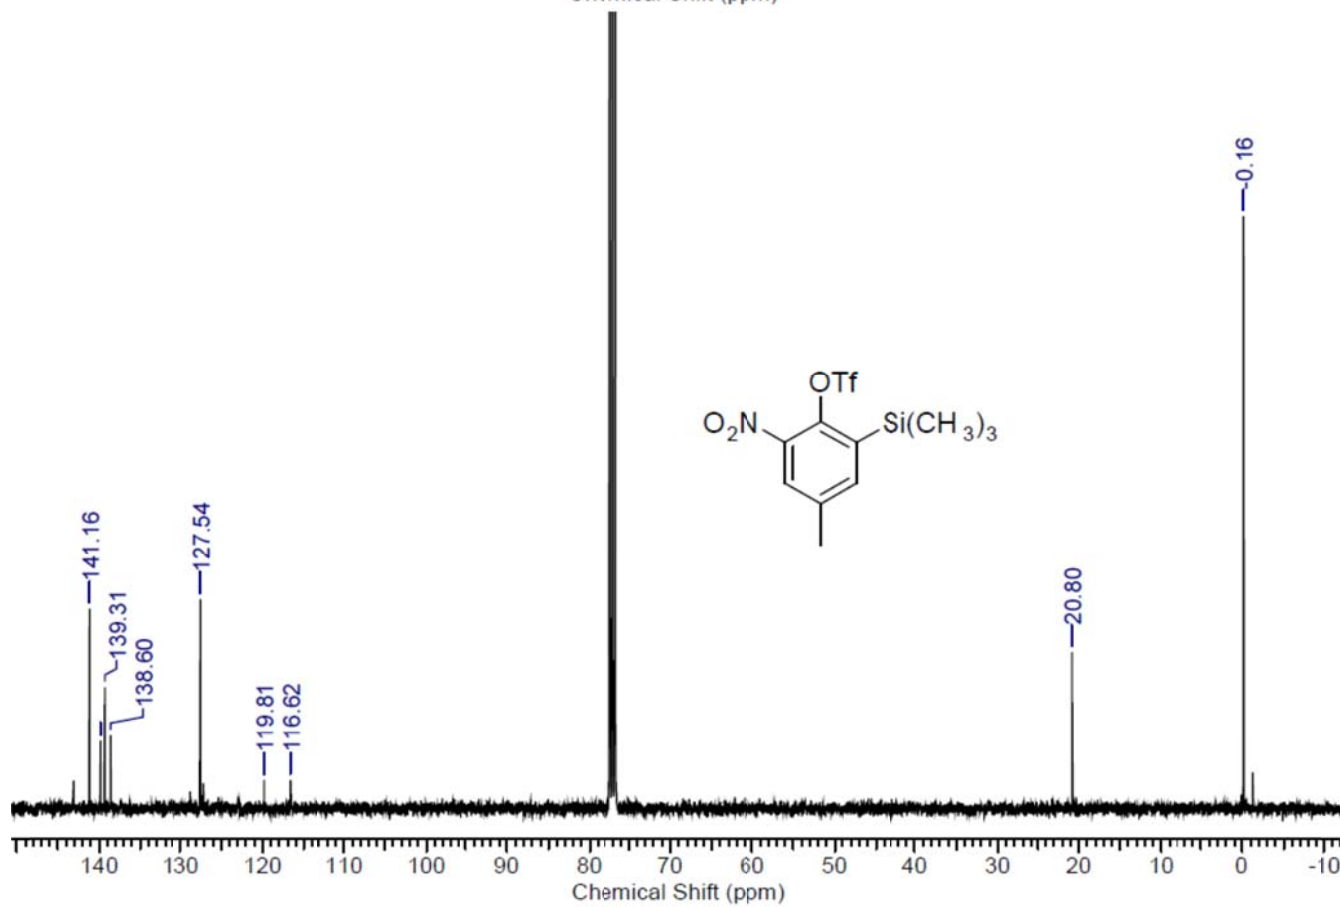

**Compound 26:**

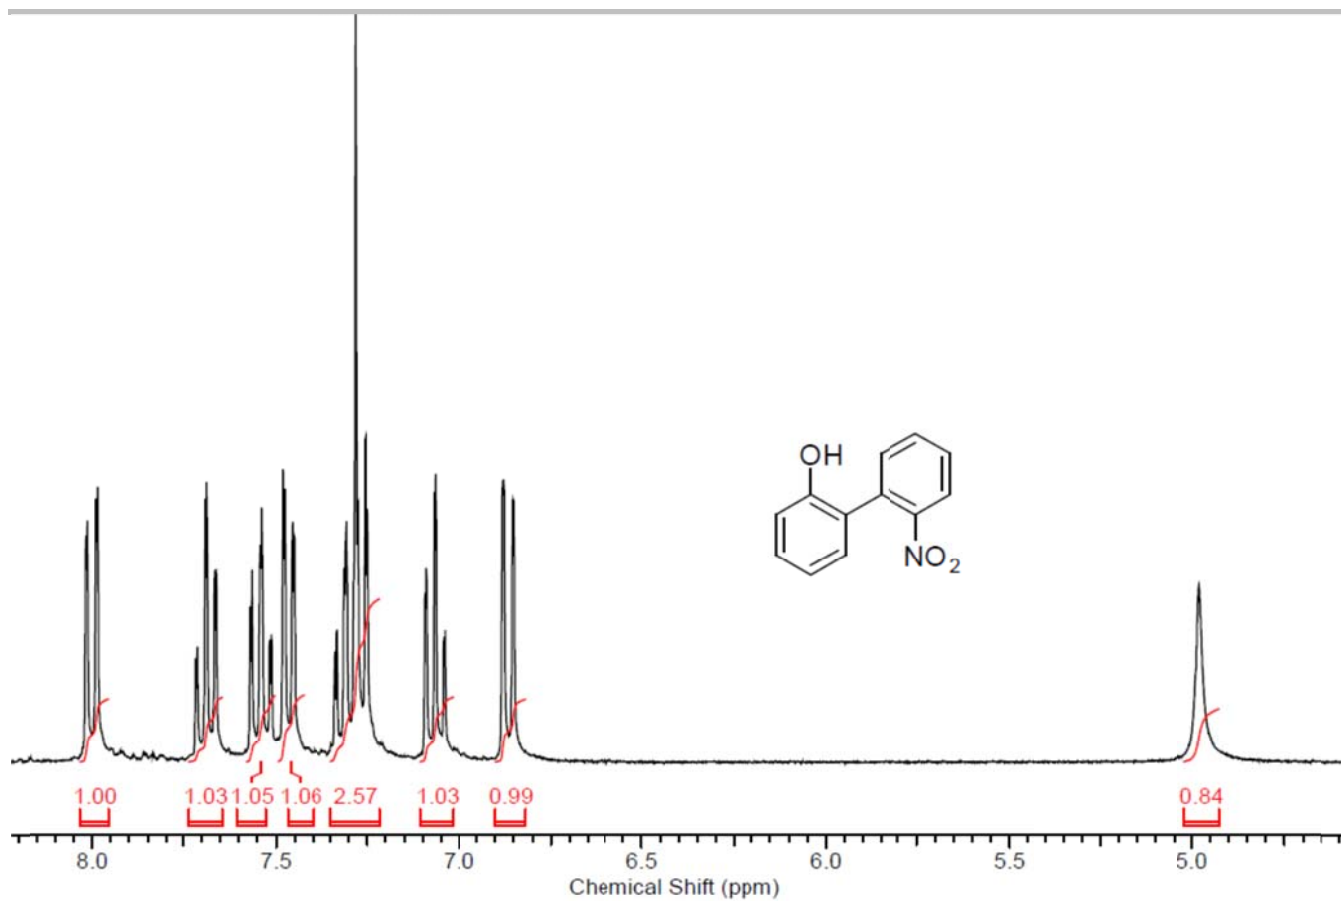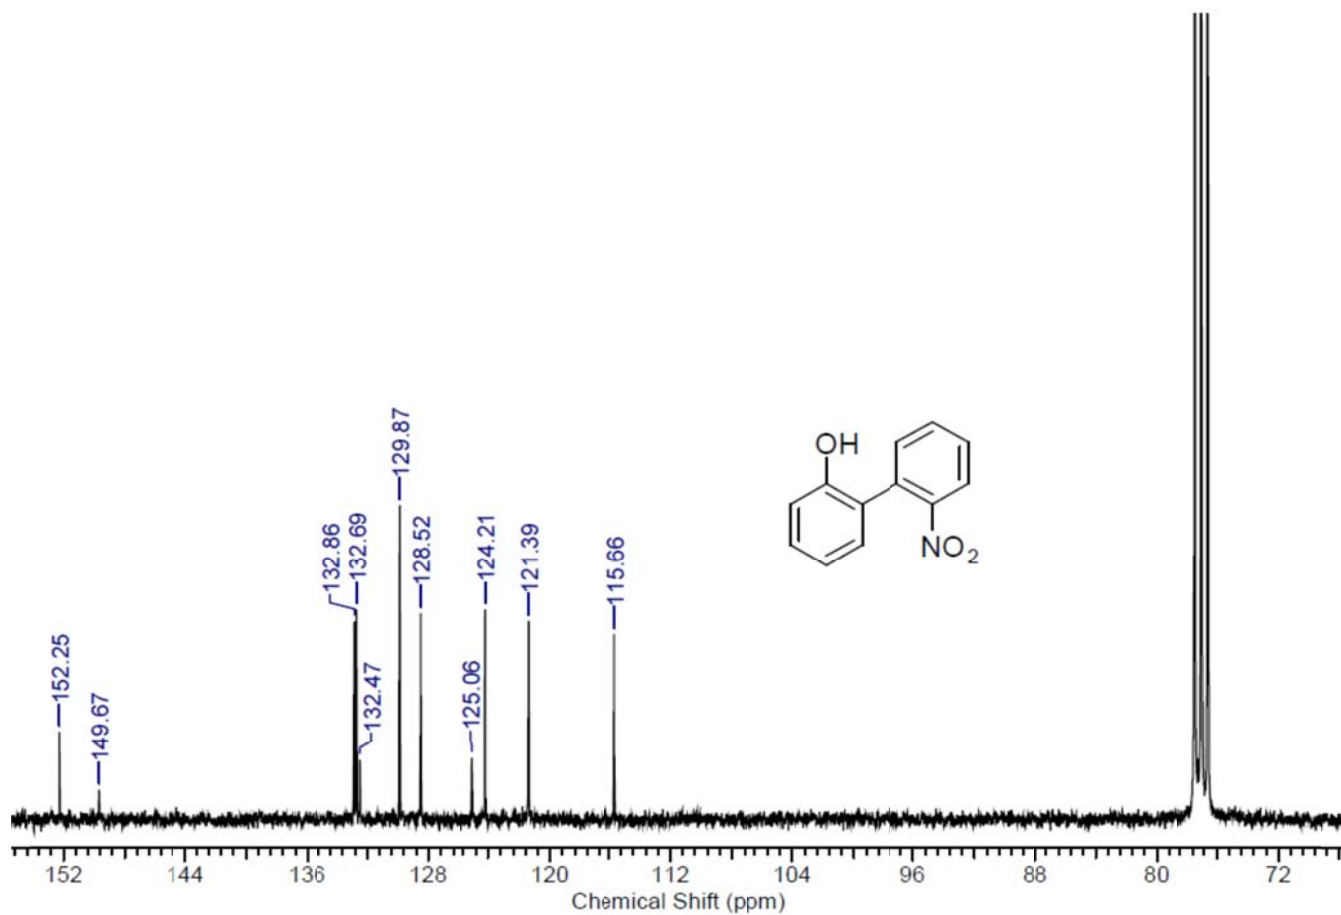

**Compound 25:**

-NITRO REARRANGED.010.001.1R.esp

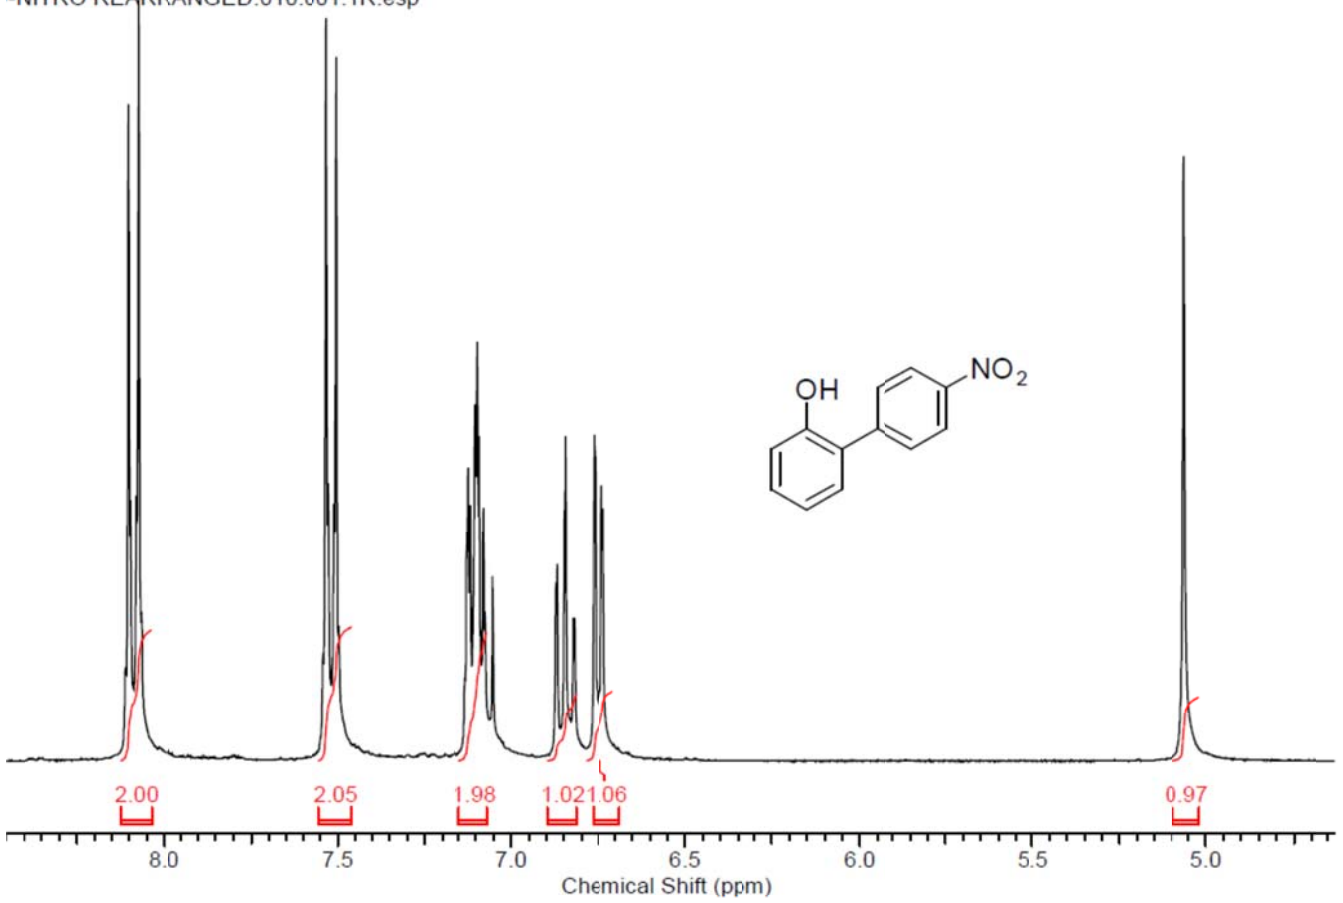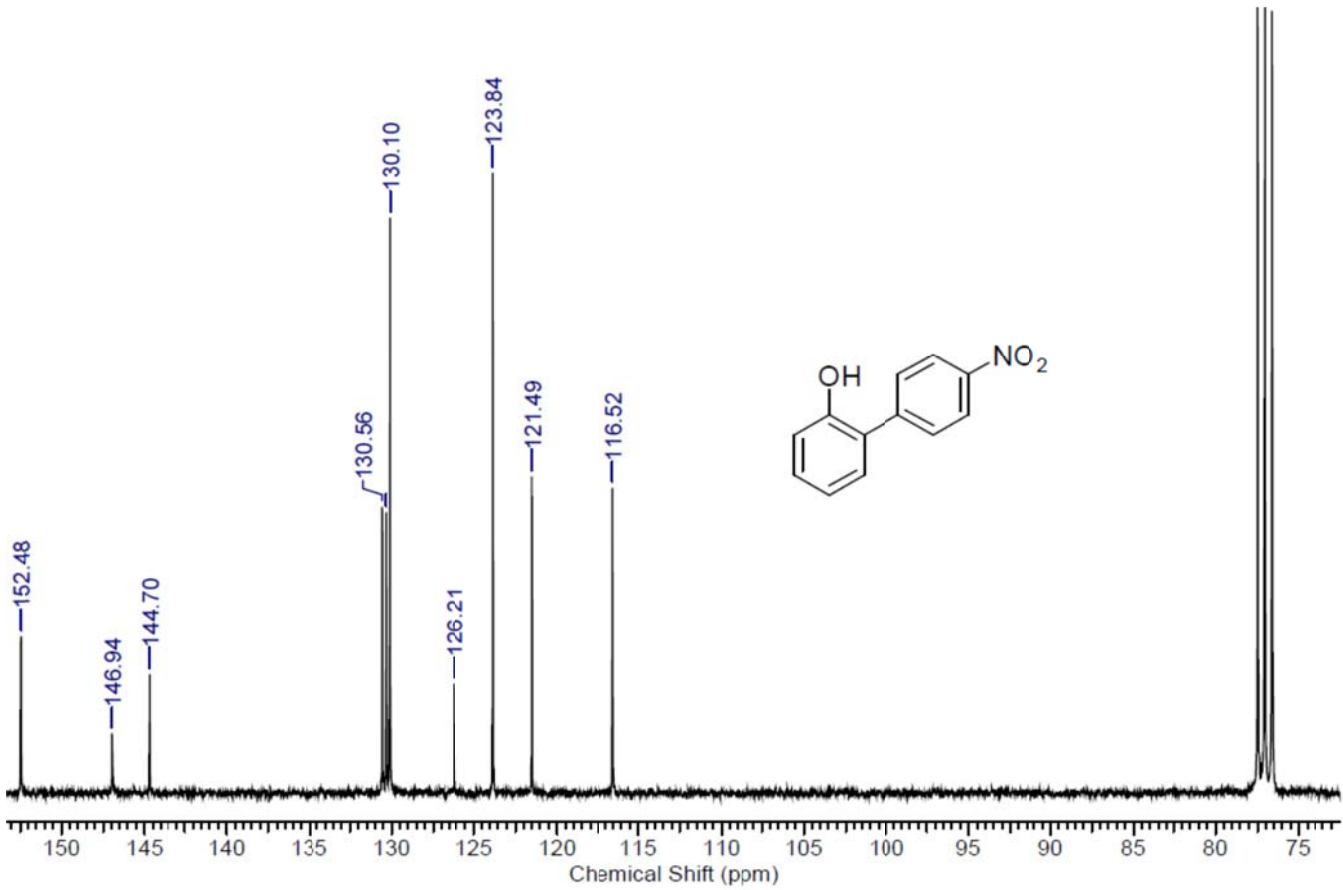

**Compound 52:**

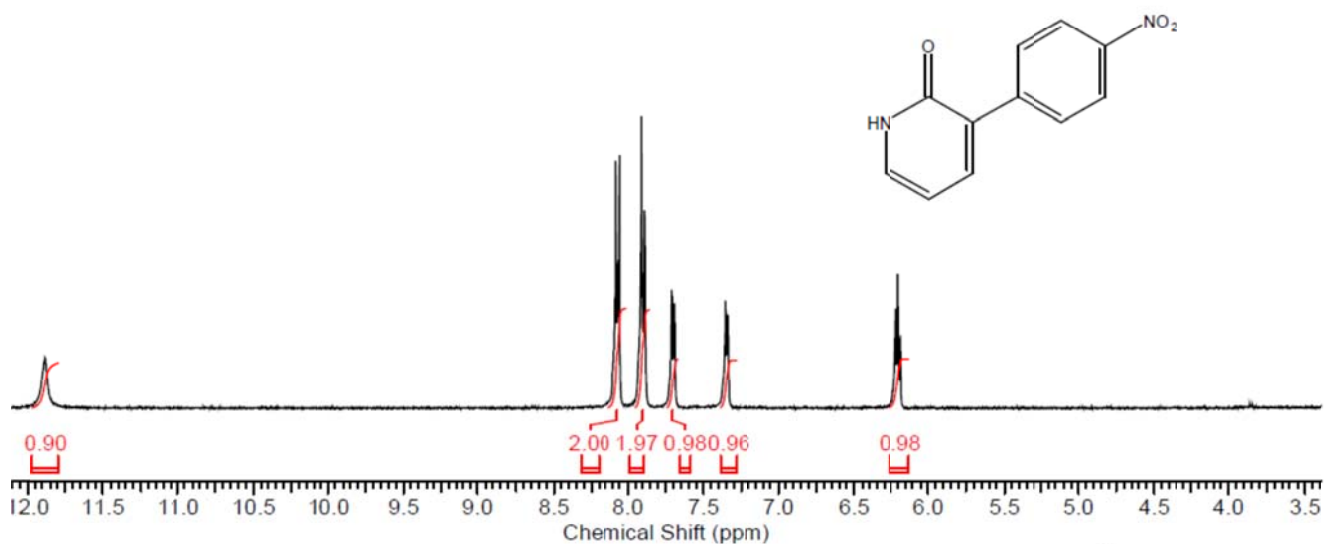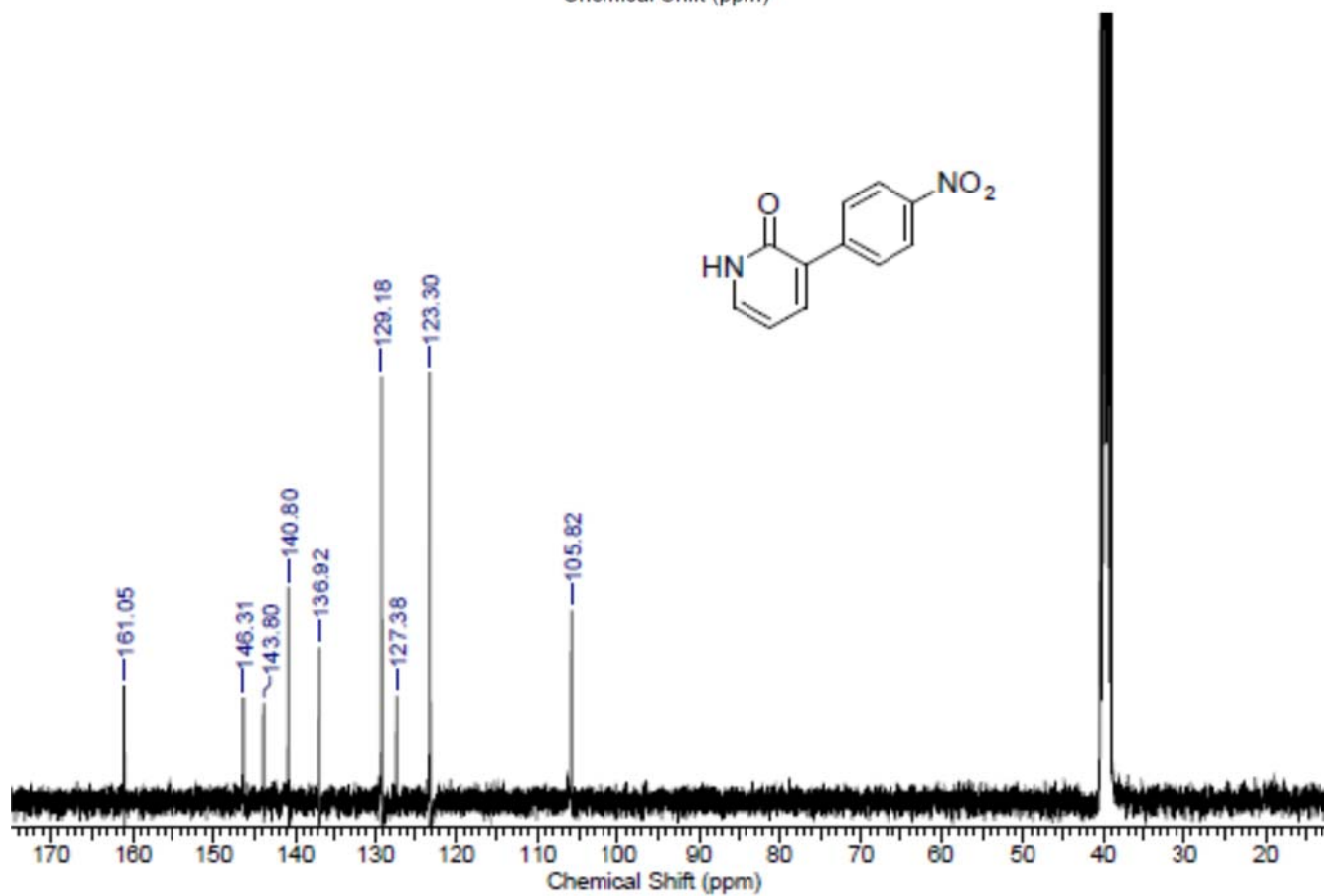

**Compound 16:**

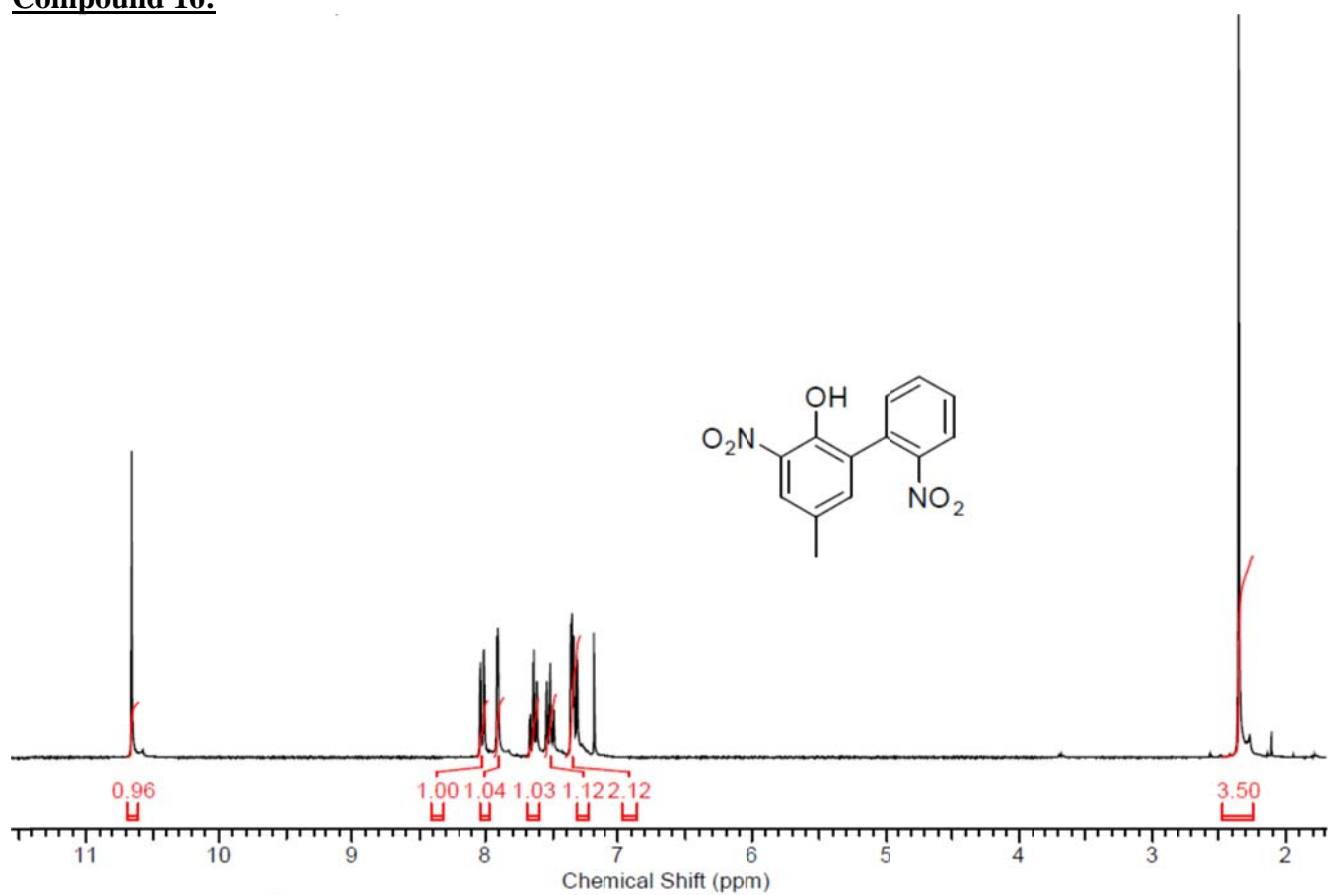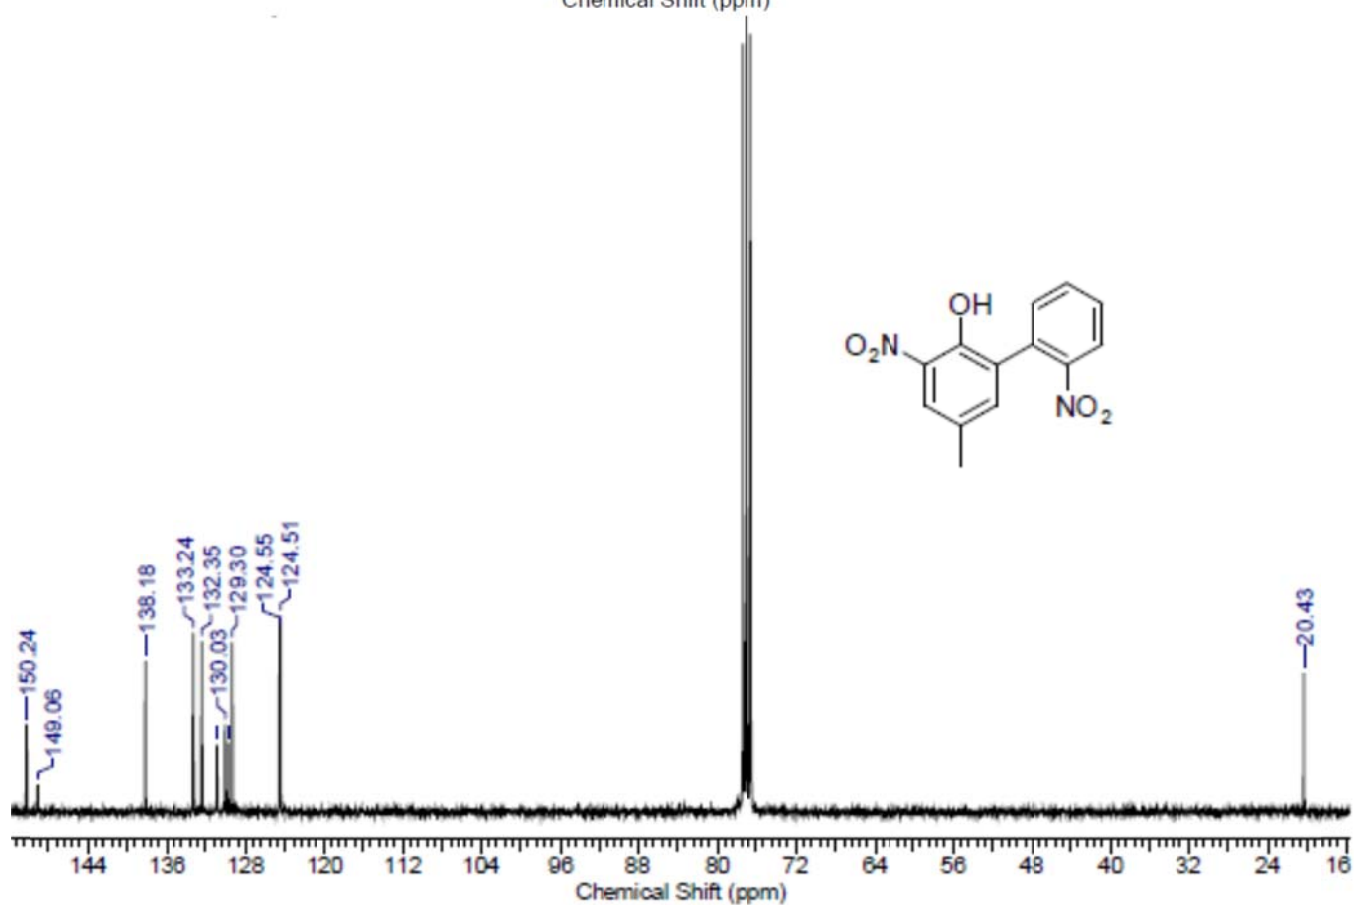

**Compound 15:**

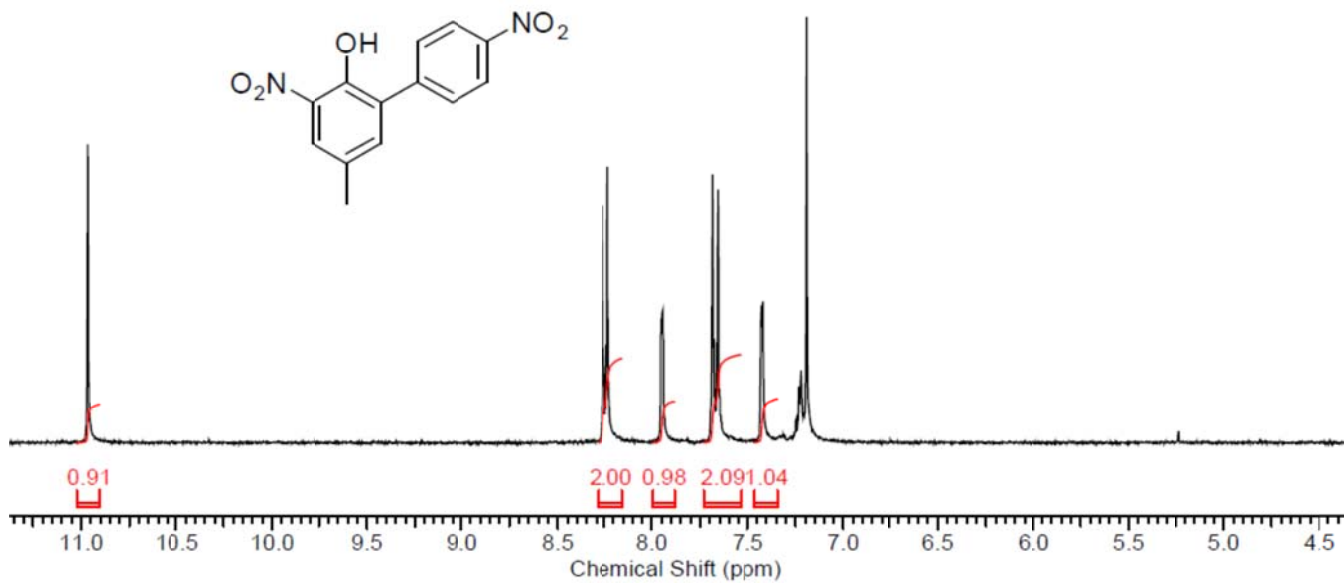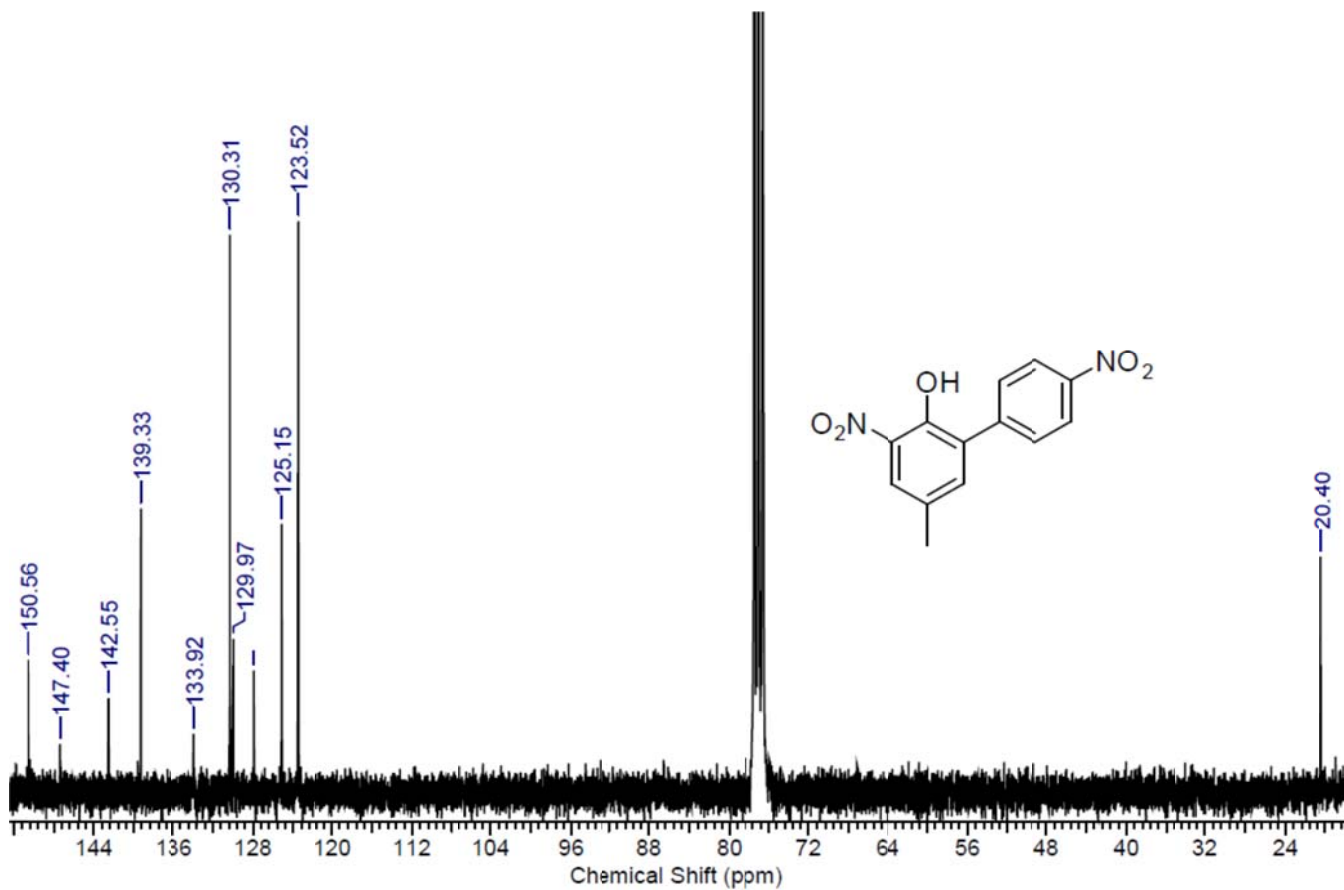

**Compound 17:**

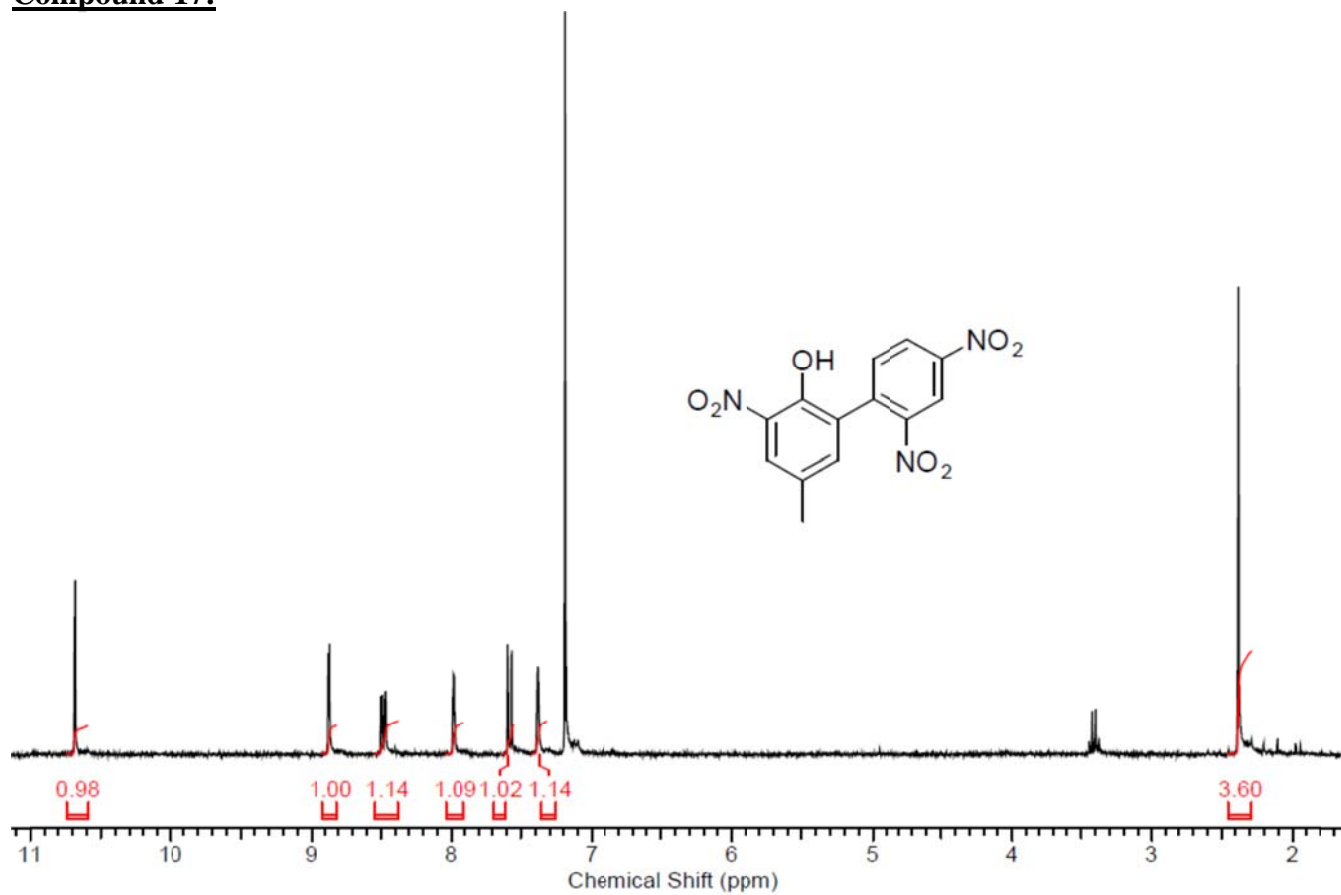



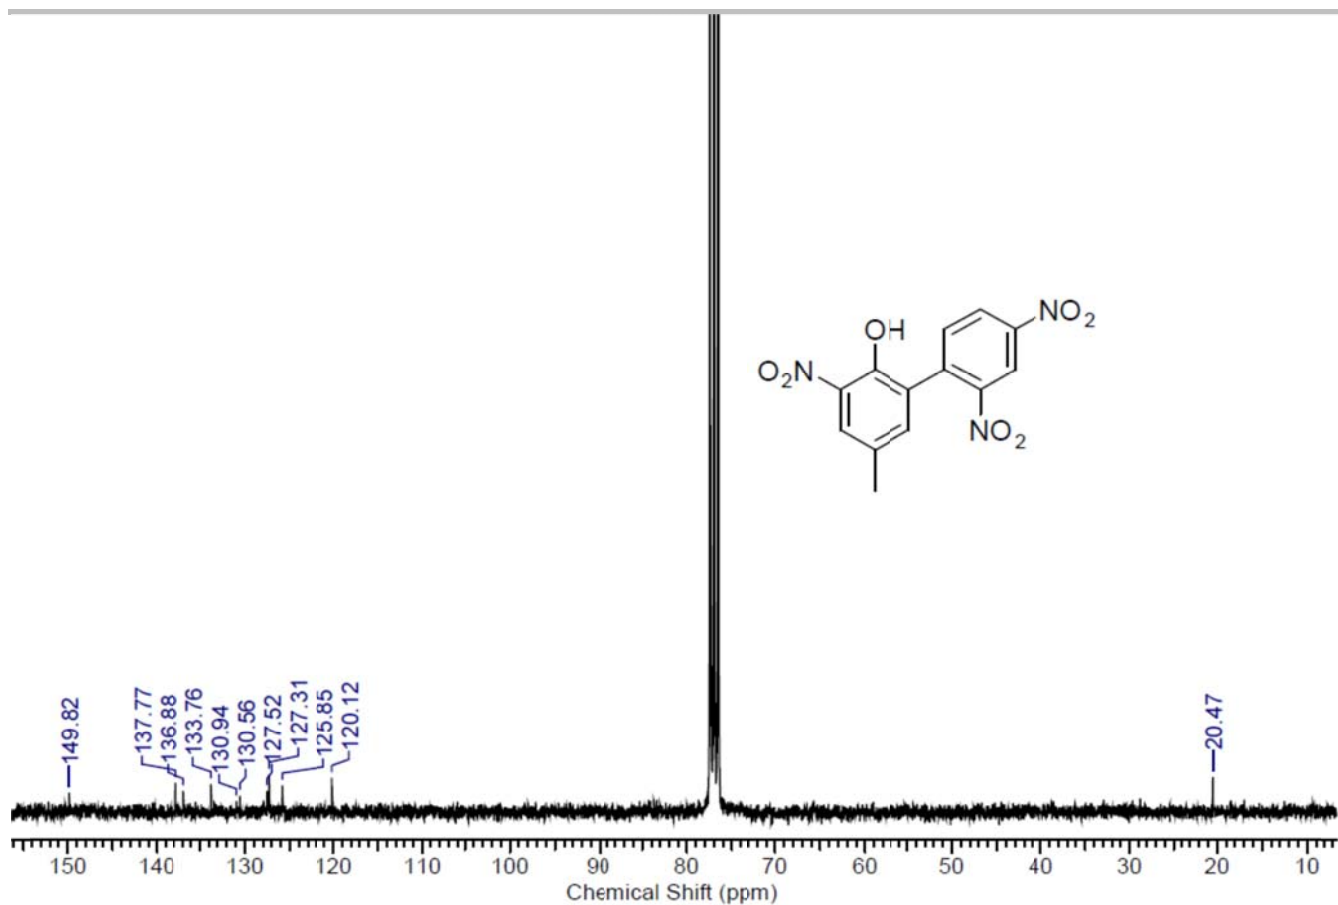

**Compound 42:**

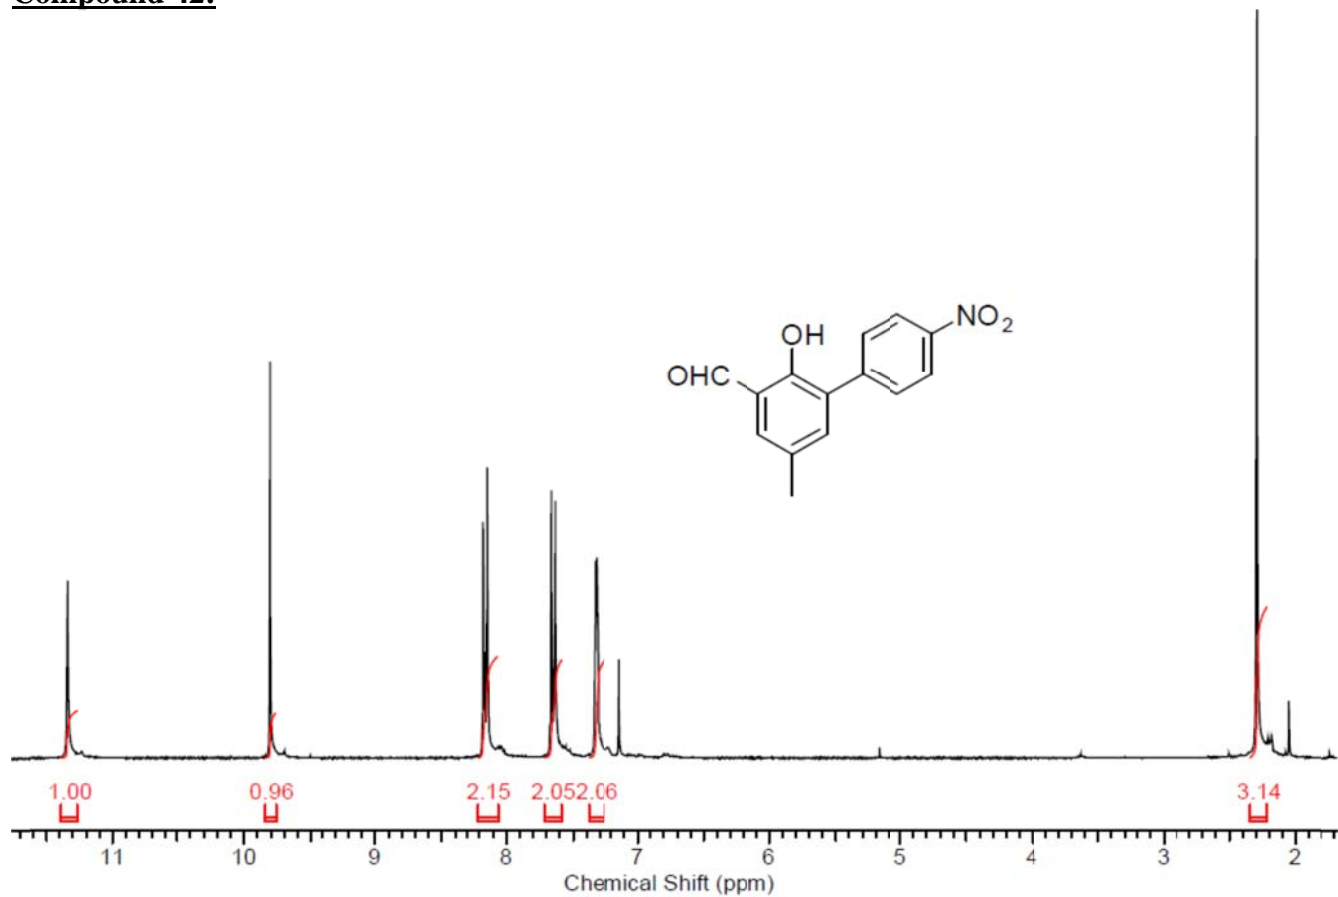

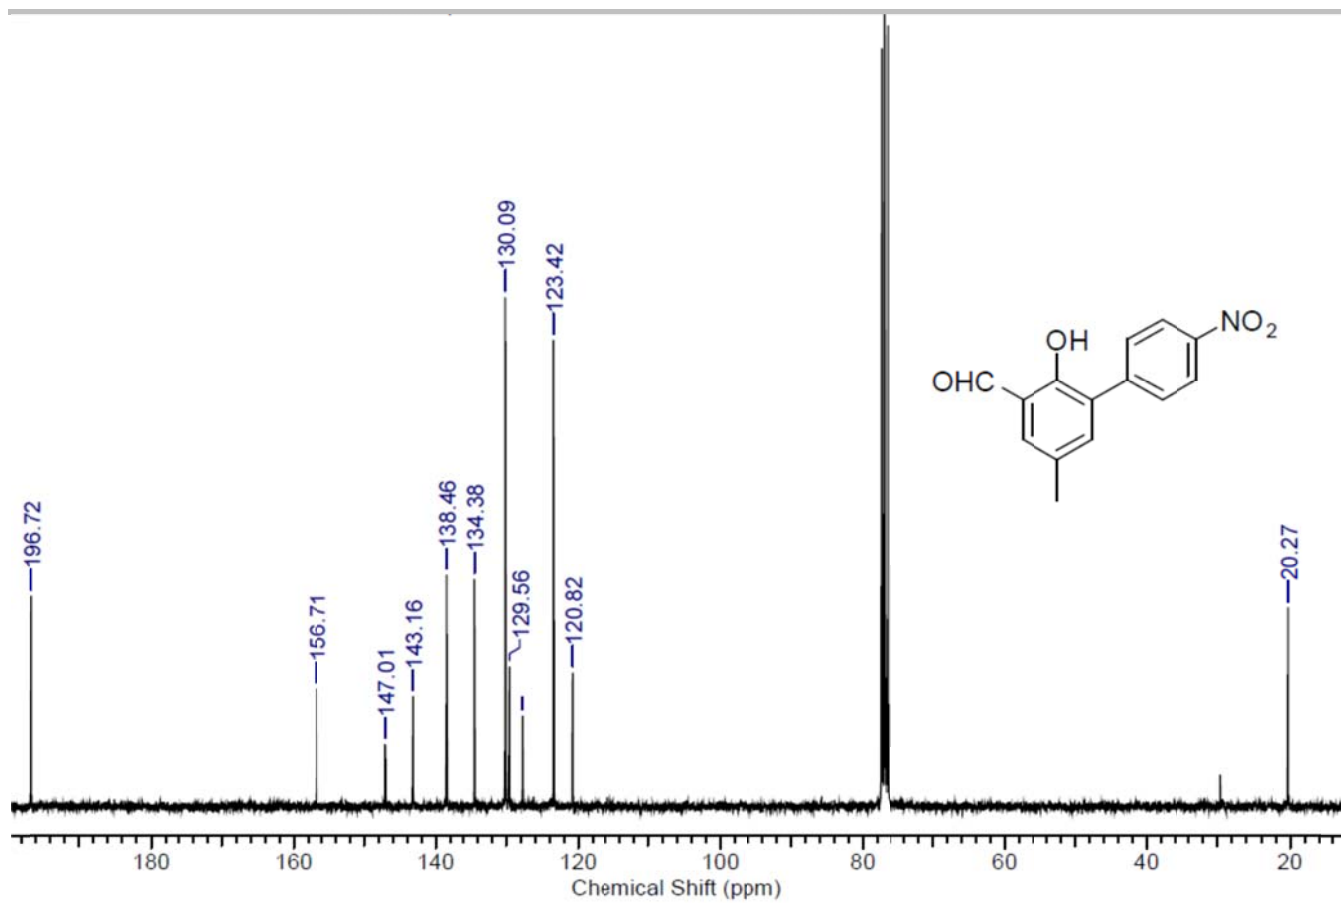

**Compound 41:**

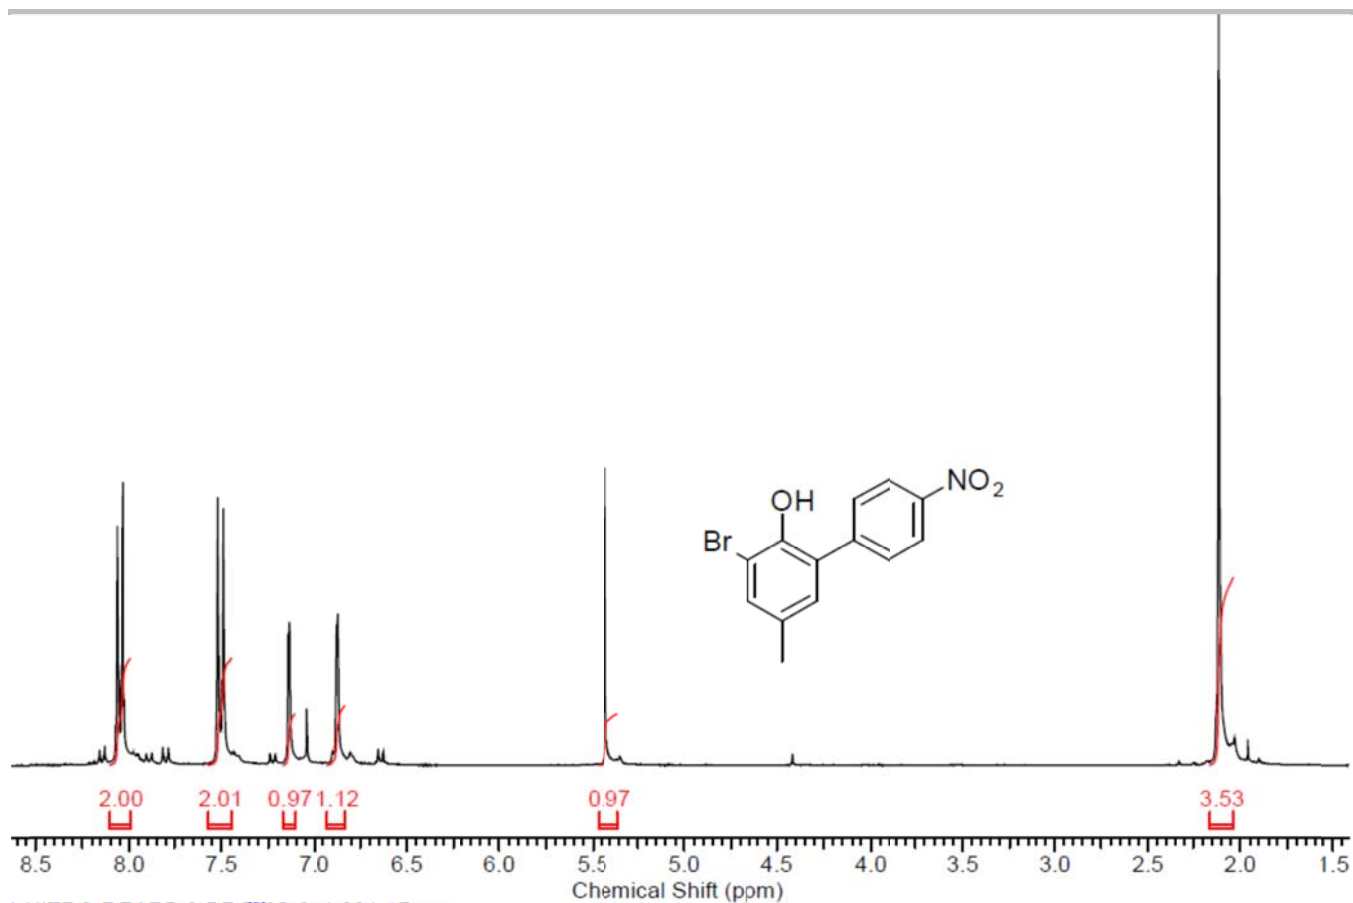

I-NITRO REARR 6-BROMO.011.001.1R.esp

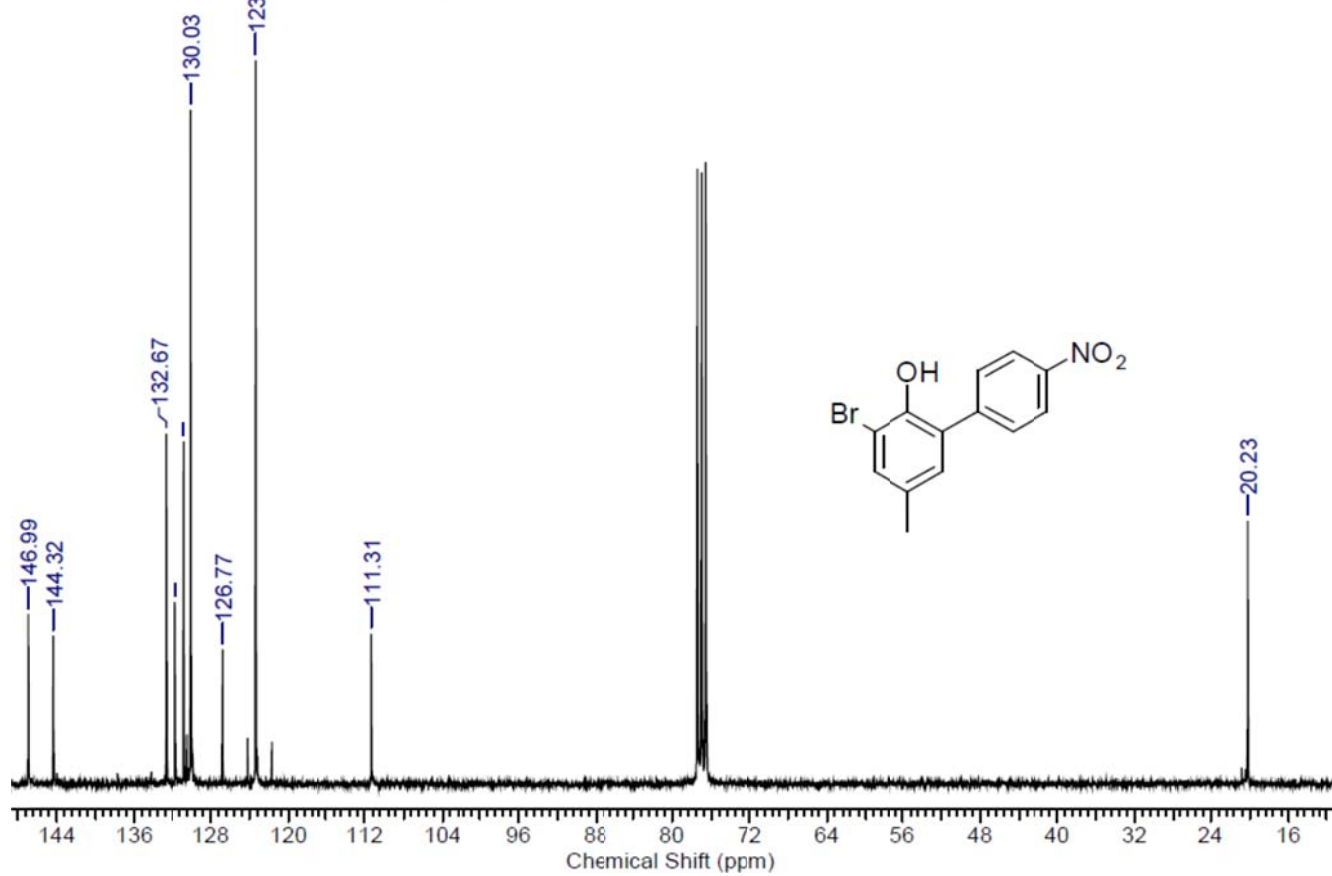

**Compound 10:**

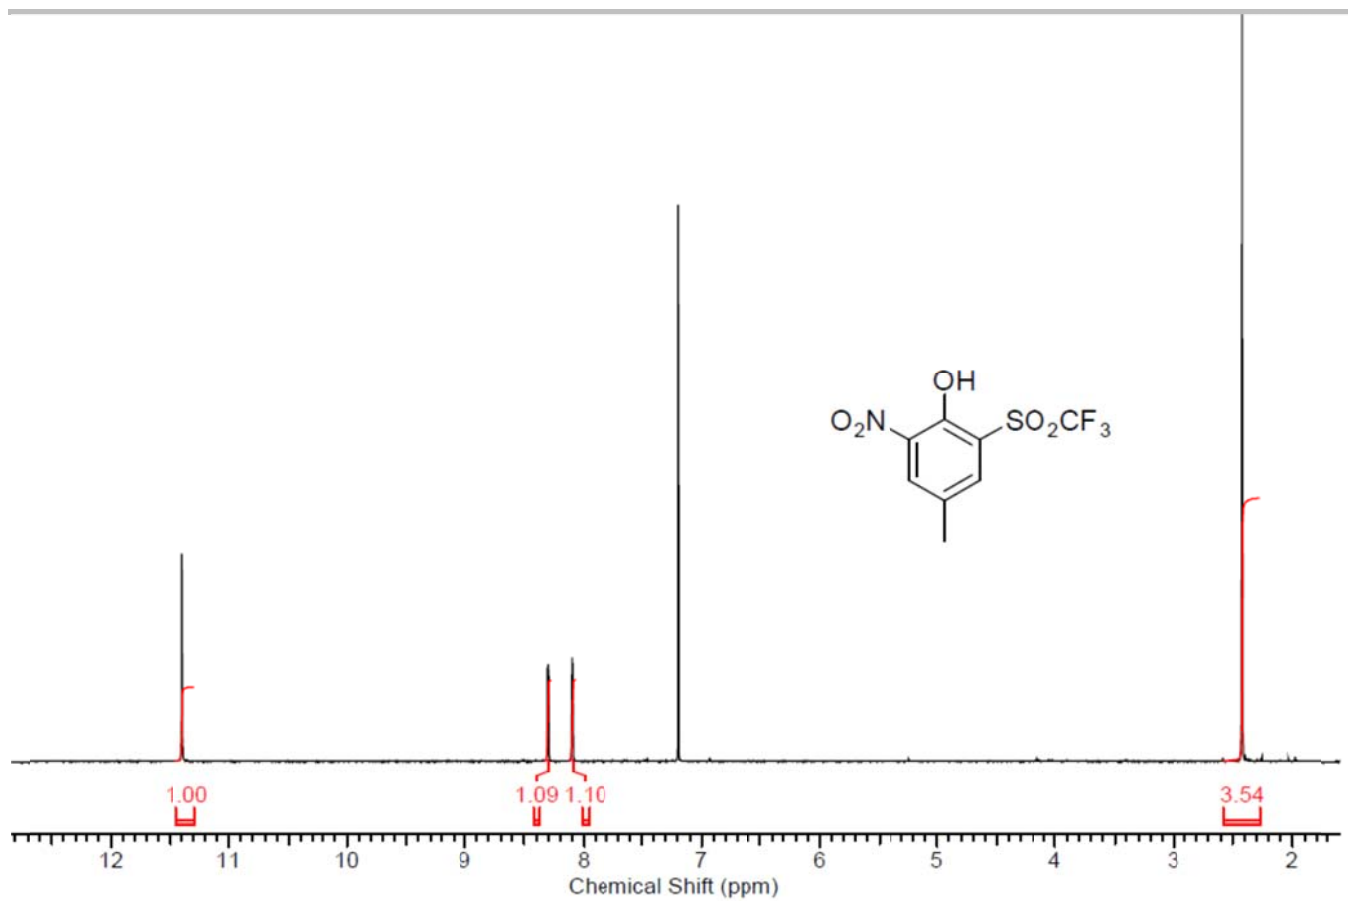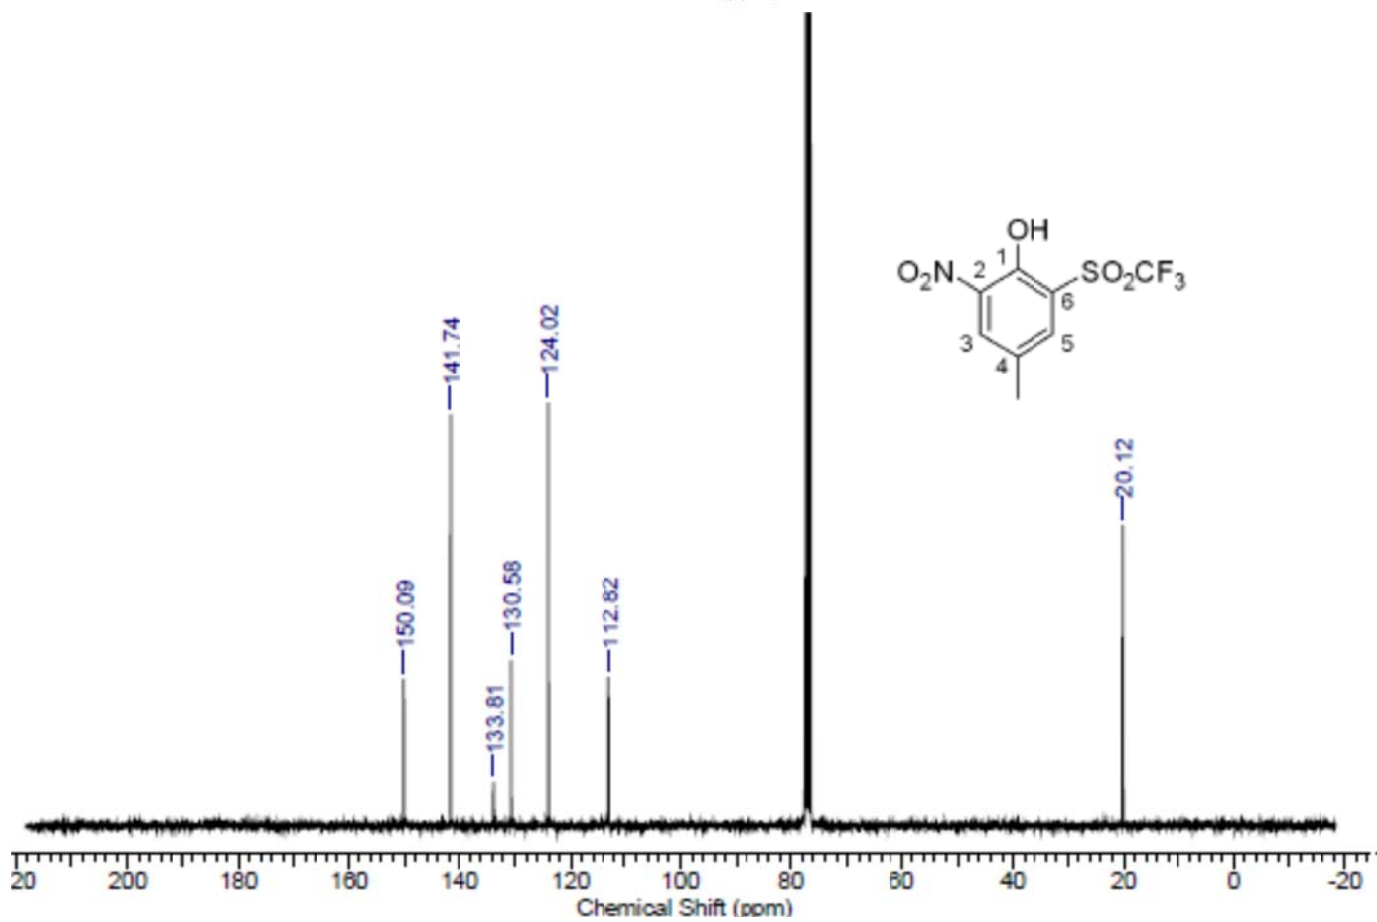

76.33

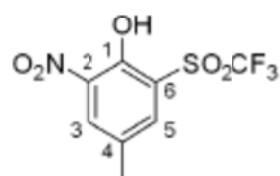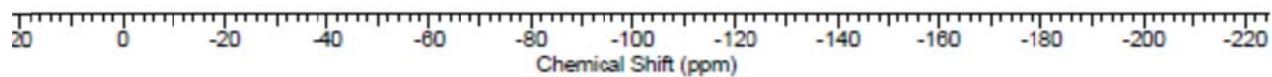

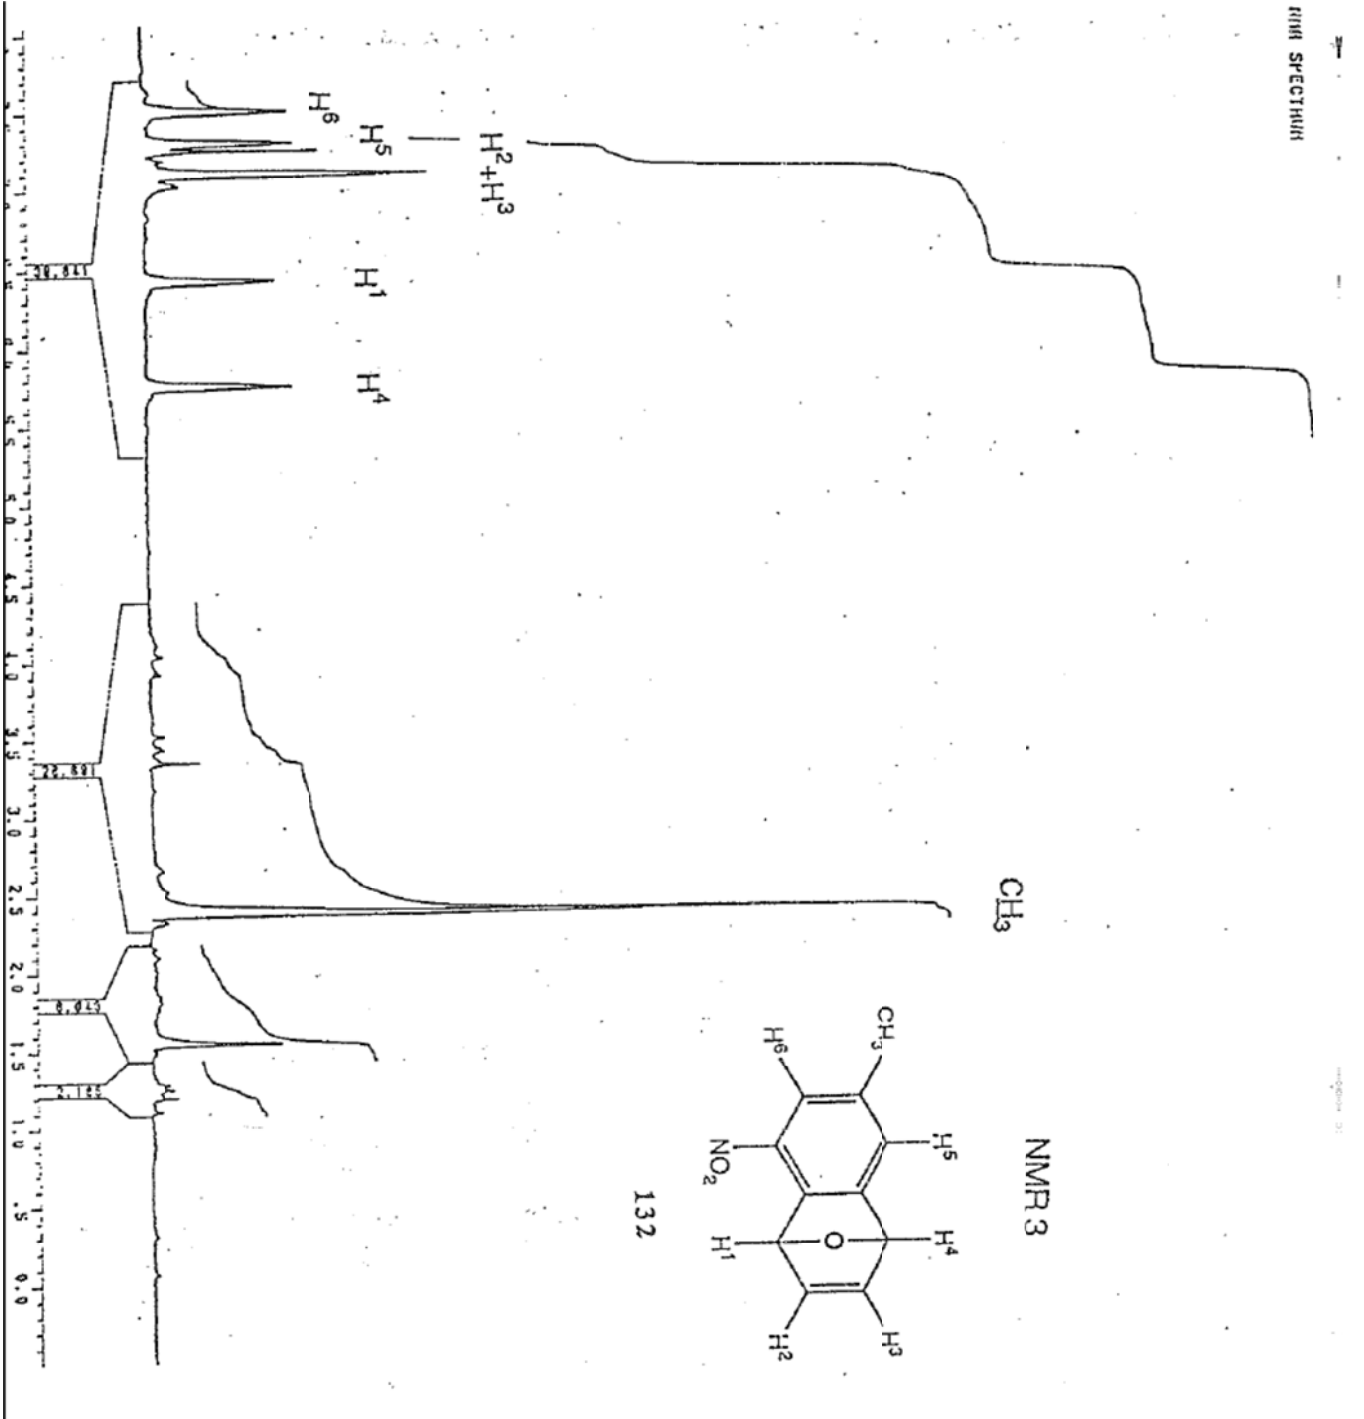

**Compound 9:**

**Compound 48:**

014-03-0347 AQ 13.010.001 TR.esp

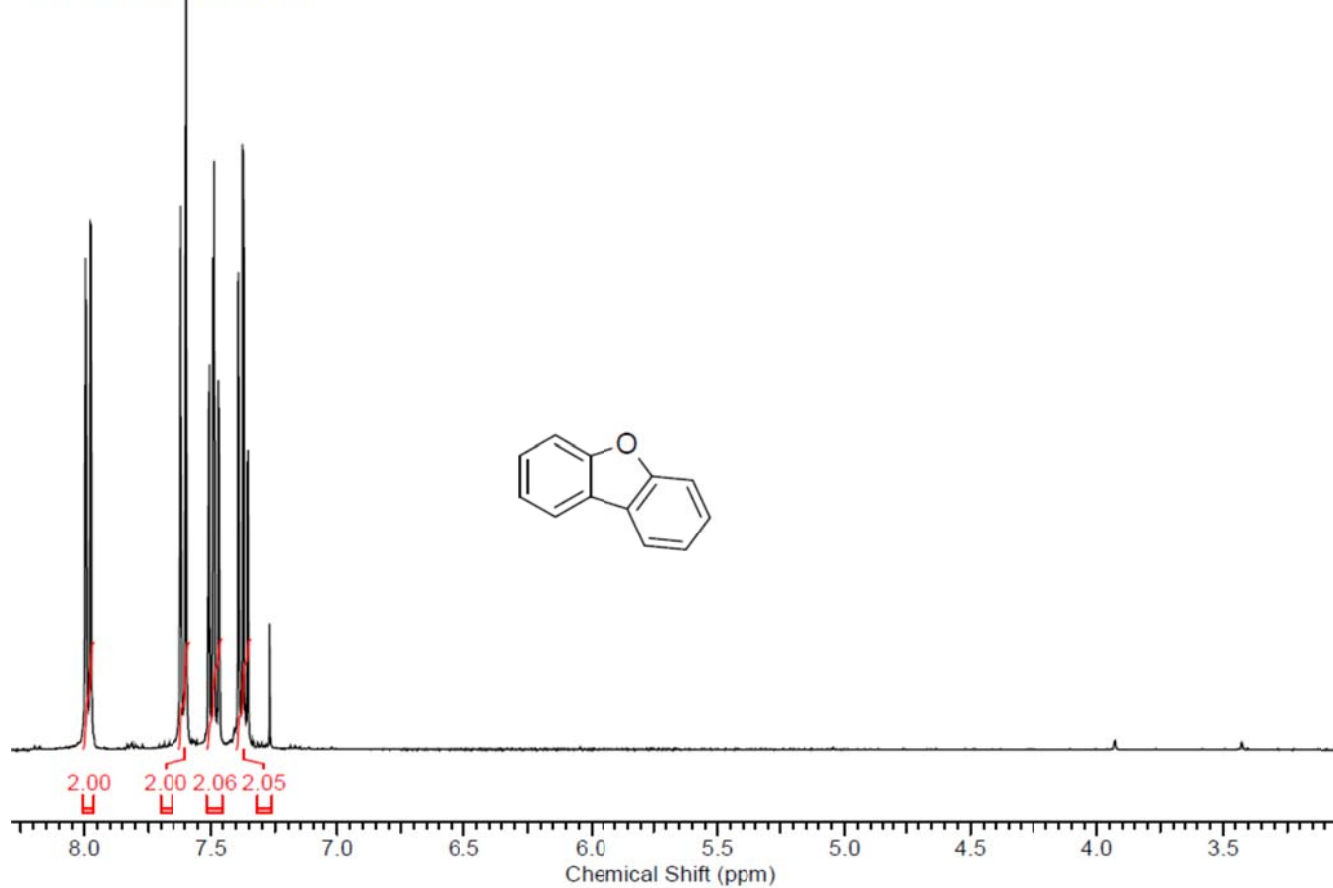

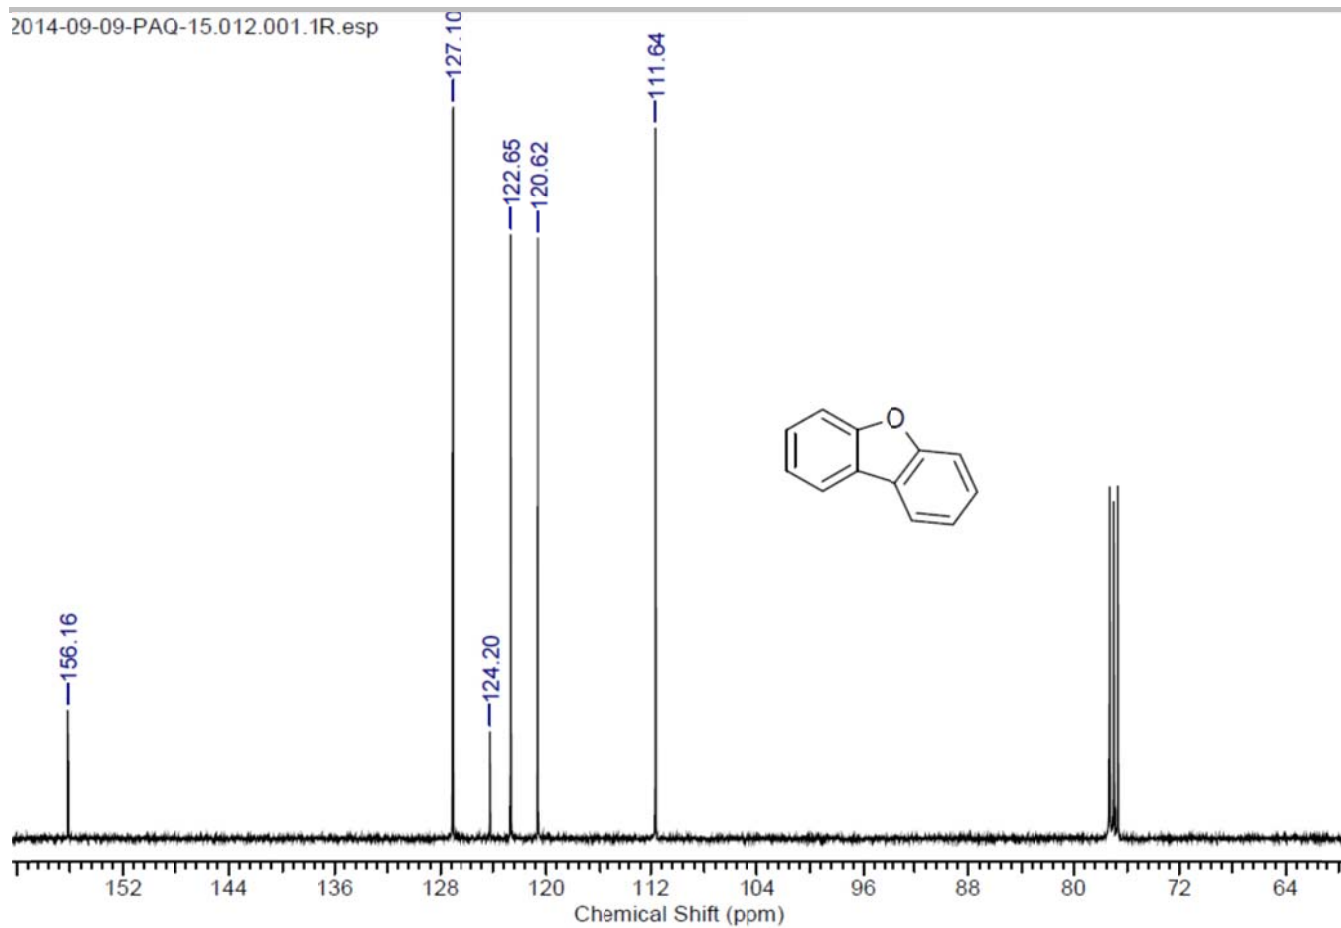

**Compound 54:**



1-10DO.010.001,1R.esp

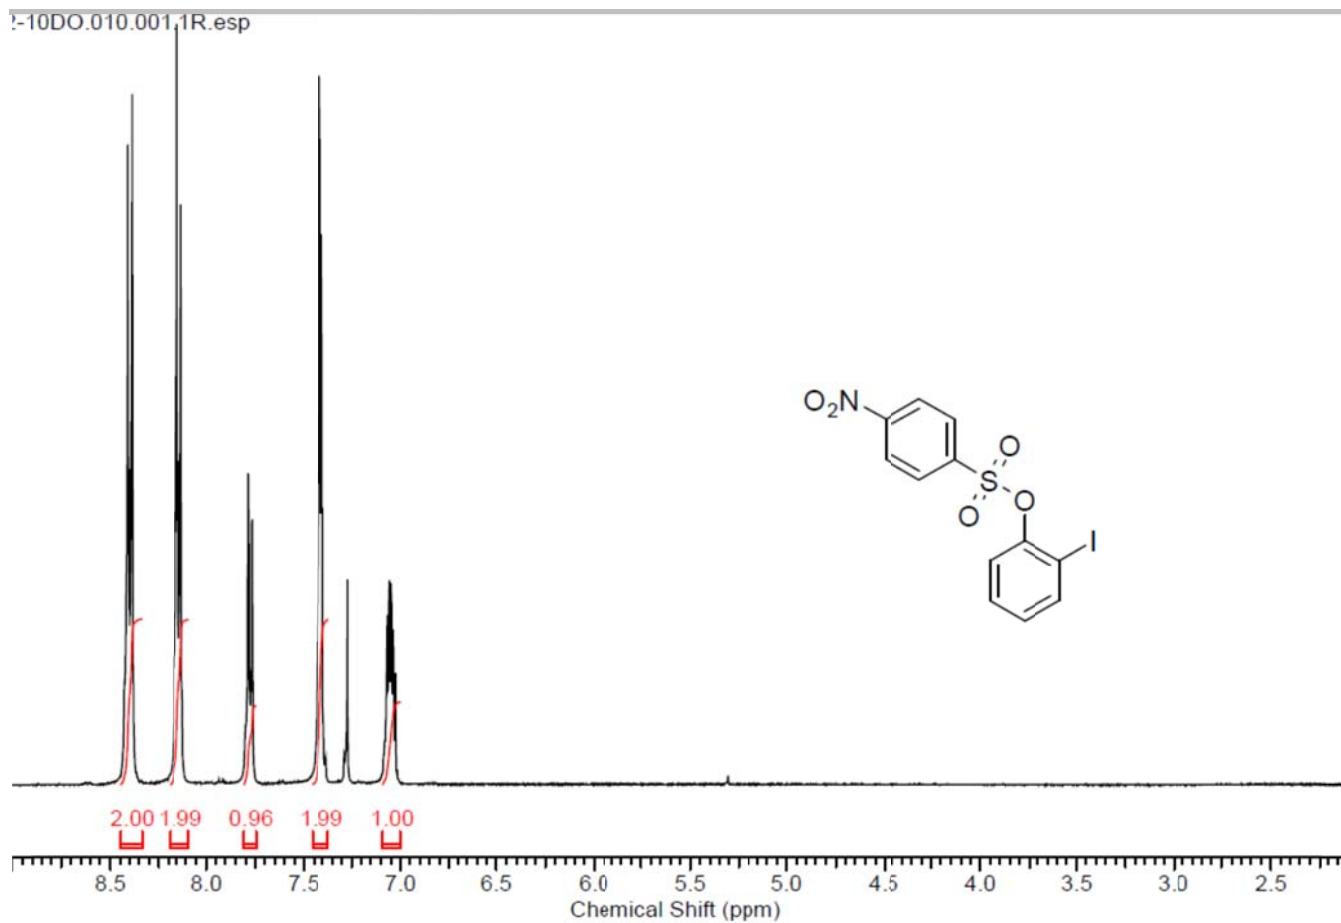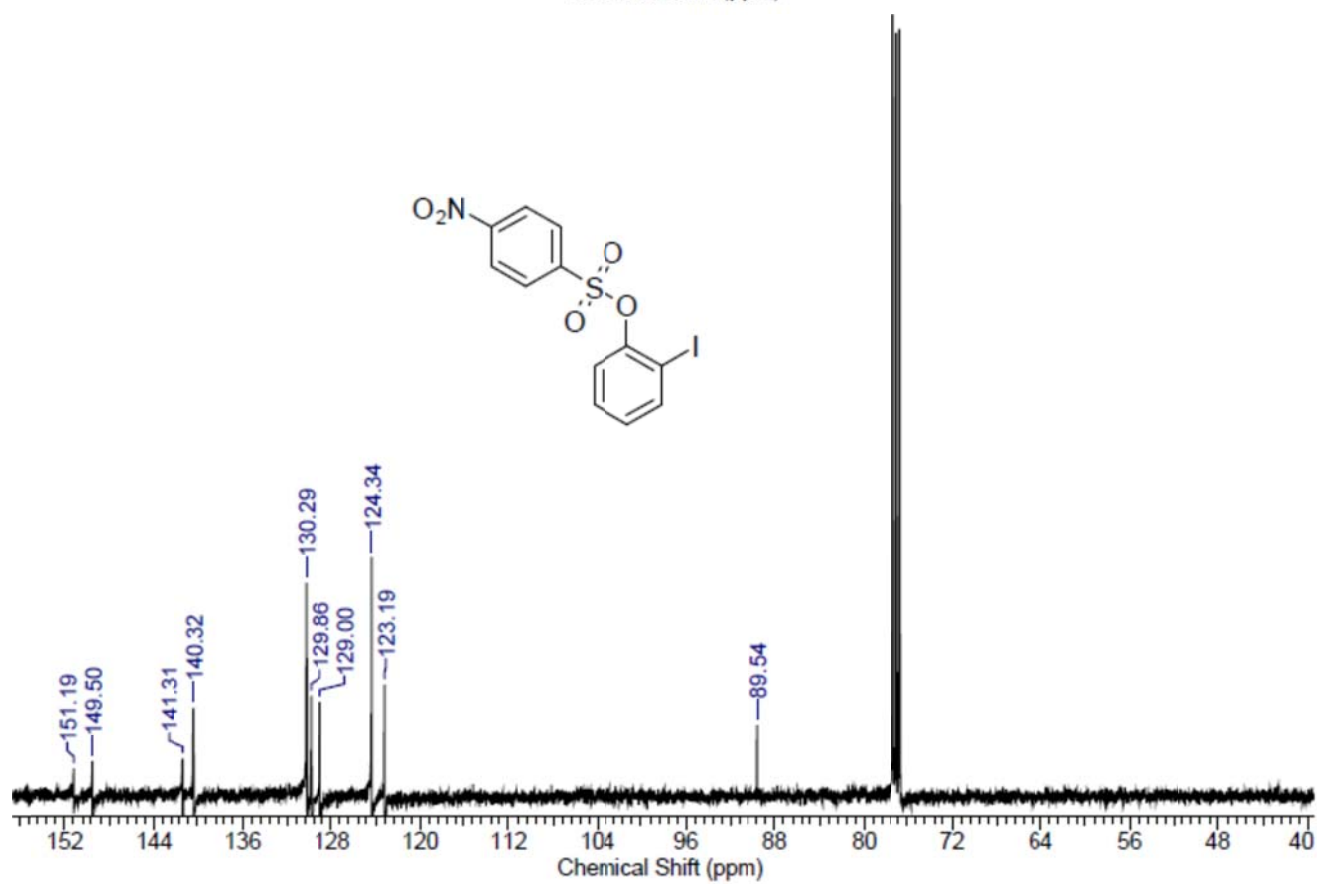

**Compound 53:**

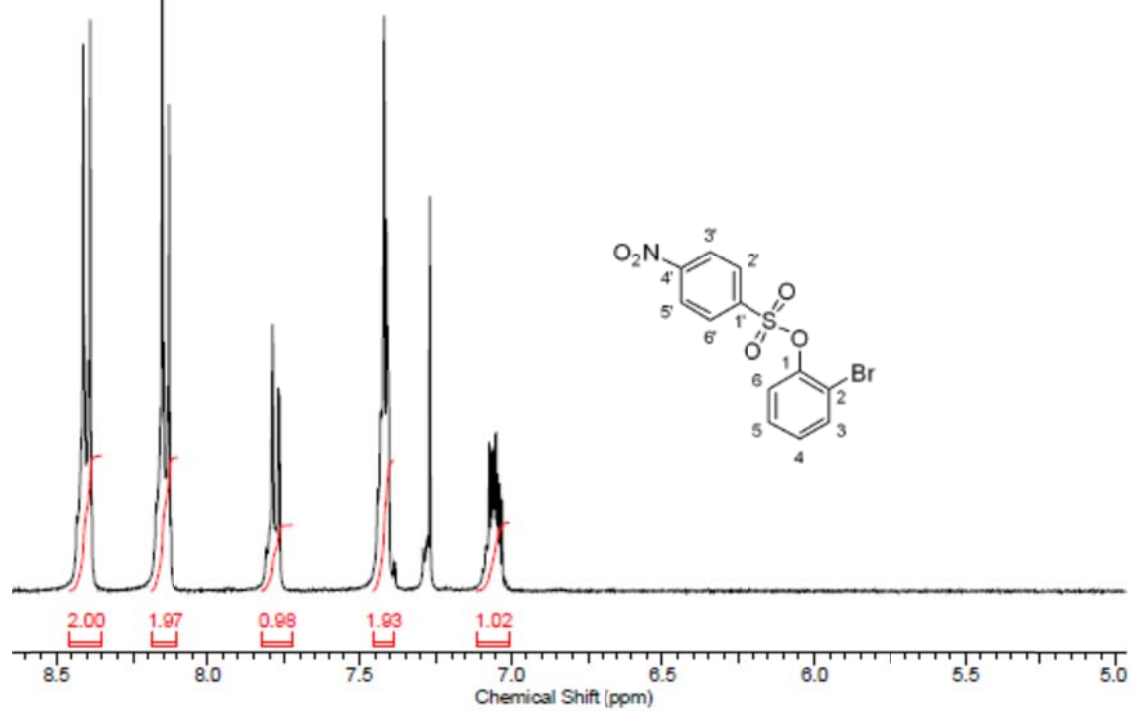

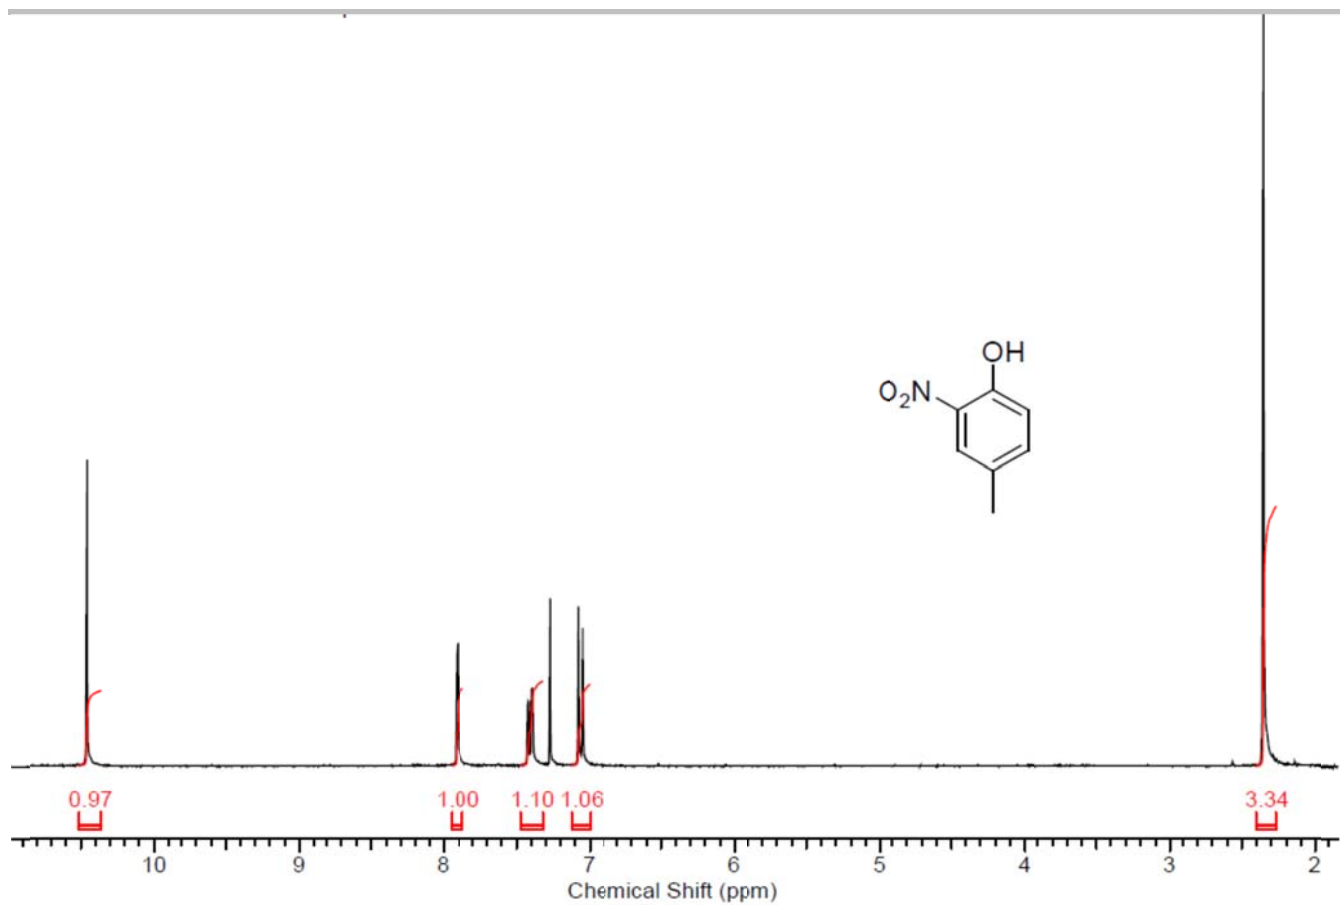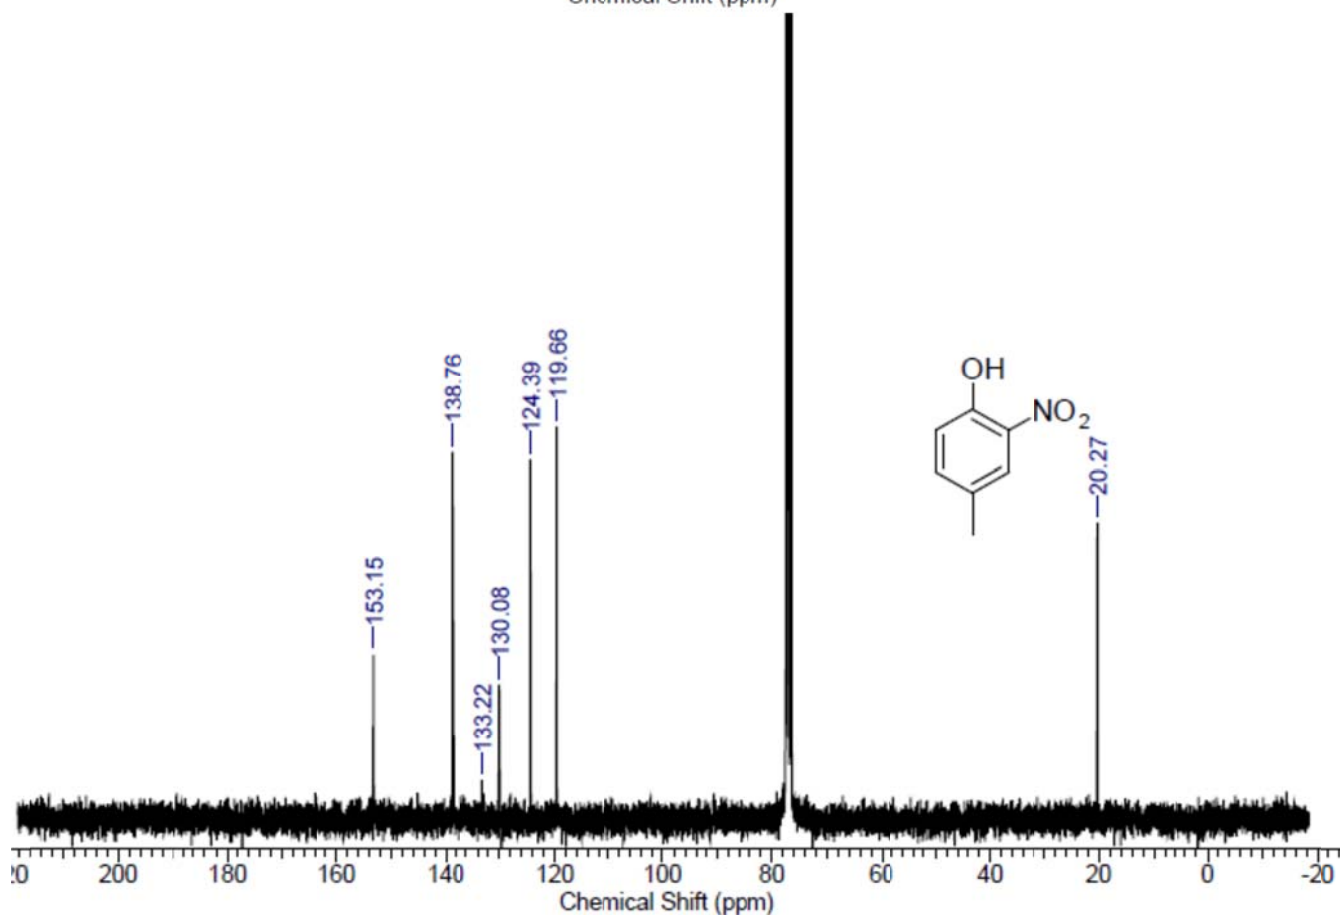

**Compound 46:**

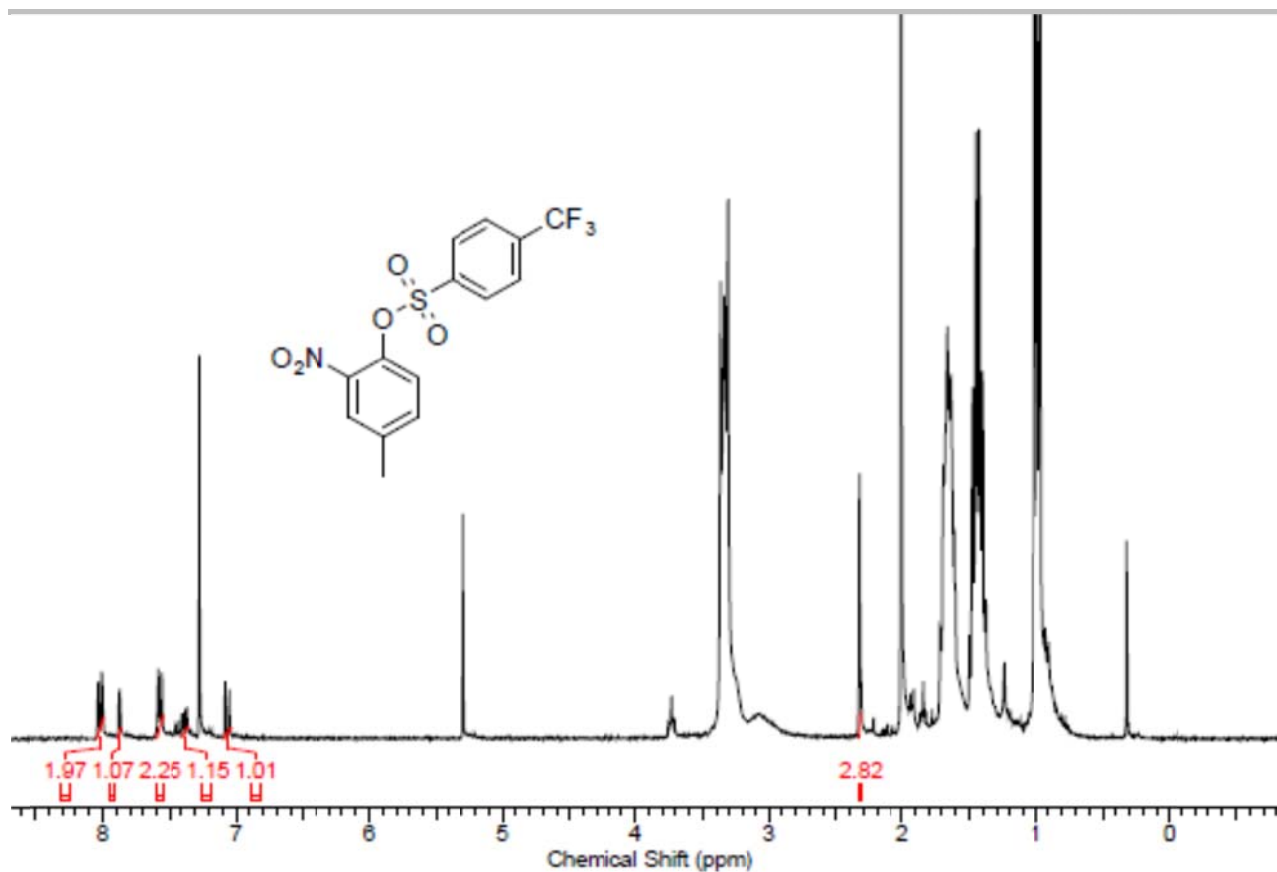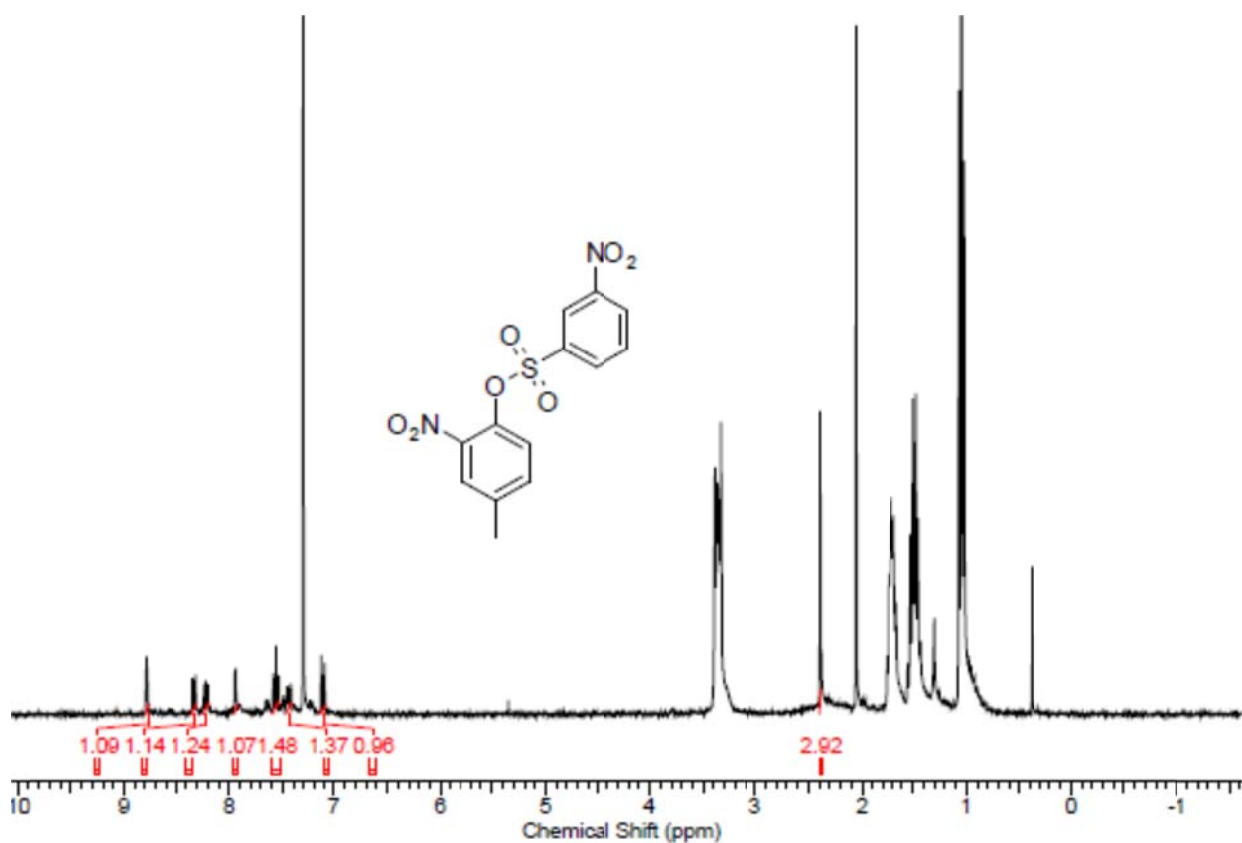

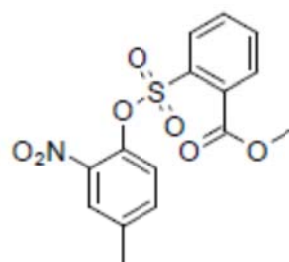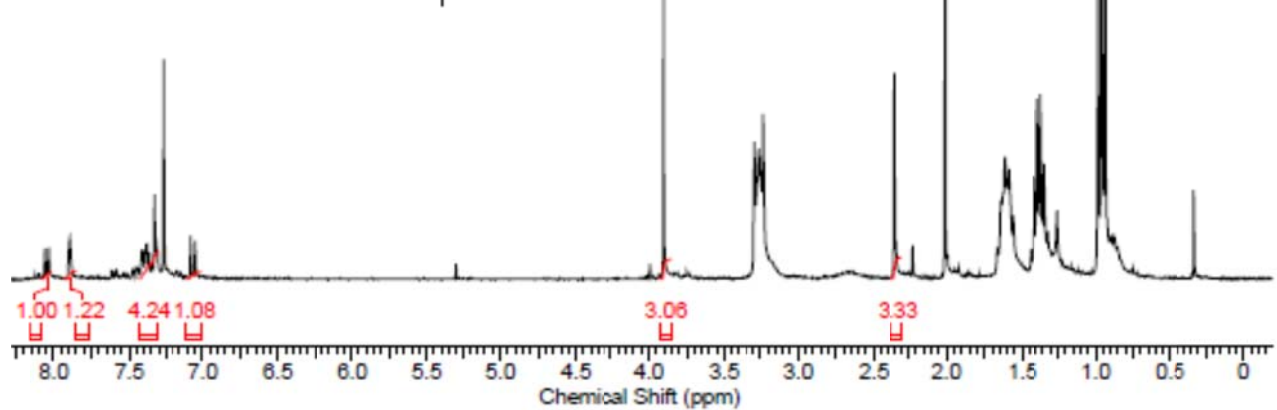

---

## Part C: X-ray crystal structure data

| Cpd no. | UoM Identifier | CCDC no. |
|---------|----------------|----------|
| 10      | s3767          | 1056926  |
| 16      | s3898          | 1056929  |
| 20      | s3726          | 1056923  |
| 25      | S3776          | 1056927  |
| 50      | s3883          | 1056928  |
| 21      | S3727          | 1056924  |

Cif files of these structures can be obtained, free of charge, from the Cambridge Crystallographic Data Centre:  
<http://www.ccdc.cam.ac.uk/>

### CCDC 1056923

Formula: C<sub>15</sub> H<sub>17</sub> N<sub>1</sub> O<sub>5</sub> S<sub>1</sub> Si<sub>1</sub>

Unit Cell Parameters: a 9.8463(2) b 9.1987(2) c 18.7908(5) P21/c

---

### Summary of Data CCDC 1056924

Formula: C<sub>15</sub> H<sub>16</sub> N<sub>2</sub> O<sub>7</sub> S<sub>1</sub> Si<sub>1</sub>

Unit Cell Parameters: a 13.5825(3) b 10.5322(2) c 12.8580(3) P21/c

---

### Summary of Data CCDC 1056926

Compound Name:

Formula: C<sub>8</sub> H<sub>6</sub> F<sub>3</sub> N<sub>1</sub> O<sub>5</sub> S<sub>1</sub>

Unit Cell Parameters: a 5.3555(6) b 12.8070(14) c 16.0563(15) P21/n

---

### Summary of Data CCDC 1056927

Formula: C<sub>12</sub> H<sub>9</sub> N<sub>1</sub> O<sub>3</sub>

Unit Cell Parameters: a 20.5236(9) b 7.6948(3) c 18.8253(9) Cc

---

### Summary of Data CCDC 1056928

Compound Name:

Formula: C<sub>14</sub> H<sub>16</sub> N<sub>2</sub> O<sub>5</sub> S<sub>1</sub> Si<sub>1</sub>

Unit Cell Parameters: a 13.2148(2) b 10.9938(2) c 12.0527(2) P21/c

---

### Summary of Data CCDC 1056929

Compound Name:

Formula: C<sub>13</sub> H<sub>10</sub> N<sub>2</sub> O<sub>5</sub>

Unit Cell Parameters: a 15.6137(4) b 7.7484(2) c 21.2252(5) P21/n

---

---

## Crystal data and structure refinement for s3727na.

|                                   |                                                                                                                          |
|-----------------------------------|--------------------------------------------------------------------------------------------------------------------------|
| Identification code               | s3727na                                                                                                                  |
| Empirical formula                 | C15 H16 N2 O7 S Si                                                                                                       |
| Formula weight                    | 396.45                                                                                                                   |
| Temperature                       | 150(2) K                                                                                                                 |
| Wavelength                        | 1.54178 Å                                                                                                                |
| Crystal system, space group       | Monoclinic, P2(1)/c                                                                                                      |
| Unit cell dimensions              | a = 13.5825(3) Å    alpha = 90 deg.<br>b = 10.5322(2) Å    beta = 101.968(2) deg.<br>c = 12.8580(3) Å    gamma = 90 deg. |
| Volume                            | 1799.40(7) Å <sup>3</sup>                                                                                                |
| Z, Calculated density             | 4, 1.463 Mg/m <sup>3</sup>                                                                                               |
| Absorption coefficient            | 2.617 mm <sup>-1</sup>                                                                                                   |
| F(000)                            | 824                                                                                                                      |
| Crystal size                      | 0.15 x 0.14 x 0.10 mm                                                                                                    |
| Theta range for data collection   | 3.33 to 67.80 deg.                                                                                                       |
| Limiting indices                  | -15<=h<=16, -12<=k<=12, -15<=l<=13                                                                                       |
| Reflections collected / unique    | 9327 / 3225 [R(int) = 0.0490]                                                                                            |
| Completeness to theta = 66.60     | 98.9 %                                                                                                                   |
| Absorption correction             | Semi-empirical from equivalents                                                                                          |
| Max. and min. transmission        | 0.7798 and 0.477511                                                                                                      |
| Refinement method                 | Full-matrix least-squares on F <sup>2</sup>                                                                              |
| Data / restraints / parameters    | 3225 / 0 / 238                                                                                                           |
| Goodness-of-fit on F <sup>2</sup> | 1.036                                                                                                                    |
| Final R indices [I>2sigma(I)]     | R1 = 0.0367, wR2 = 0.0961                                                                                                |
| R indices (all data)              | R1 = 0.0437, wR2 = 0.1016                                                                                                |
| Largest diff. peak and hole       | 0.343 and -0.303 e.Å <sup>-3</sup>                                                                                       |

Table 2. Atomic coordinates ( x 10<sup>4</sup>) and equivalent isotropic displacement parameters (Å<sup>2</sup> x 10<sup>3</sup>) for s3727na.  
U(eq) is defined as one third of the trace of the orthogonalized Uij tensor.

---

x

y

z

U(eq)

---

---

|       |          |          |          |       |
|-------|----------|----------|----------|-------|
| C(1)  | 2698(1)  | 6361(2)  | 9570(1)  | 20(1) |
| C(2)  | 3421(1)  | 6000(2)  | 9009(1)  | 20(1) |
| C(3)  | 3497(2)  | 4682(2)  | 8863(2)  | 25(1) |
| C(4)  | 2893(2)  | 3820(2)  | 9265(2)  | 28(1) |
| C(5)  | 2206(2)  | 4249(2)  | 9848(2)  | 27(1) |
| C(6)  | 2103(1)  | 5542(2)  | 10009(2) | 25(1) |
| C(7)  | 5268(2)  | 6290(2)  | 8032(2)  | 34(1) |
| C(8)  | 3513(2)  | 8144(2)  | 7427(2)  | 33(1) |
| C(9)  | 4877(2)  | 8224(2)  | 9664(2)  | 33(1) |
| C(10) | 1119(1)  | 8742(2)  | 10422(1) | 19(1) |
| C(11) | 1452(1)  | 9652(2)  | 11205(1) | 19(1) |
| C(12) | 949(1)   | 9878(2)  | 12013(2) | 21(1) |
| C(13) | 107(1)   | 9156(2)  | 12030(1) | 21(1) |
| C(14) | -260(1)  | 8258(2)  | 11271(2) | 24(1) |
| C(15) | 246(1)   | 8065(2)  | 10447(2) | 24(1) |
| N(1)  | 2371(1)  | 10403(2) | 11221(1) | 24(1) |
| N(2)  | -421(1)  | 9346(2)  | 12912(1) | 27(1) |
| O(1)  | 2648(1)  | 7698(1)  | 9775(1)  | 22(1) |
| O(2)  | 1009(1)  | 7796(2)  | 8538(1)  | 30(1) |
| O(3)  | 2045(1)  | 9716(1)  | 9046(1)  | 29(1) |
| O(4)  | 3150(1)  | 9829(1)  | 11238(1) | 30(1) |
| O(5)  | 2288(1)  | 11552(1) | 11254(2) | 44(1) |
| O(6)  | -1078(1) | 8589(2)  | 12999(1) | 38(1) |
| O(7)  | -158(1)  | 10243(2) | 13510(1) | 37(1) |
| S(1)  | 1692(1)  | 8513(1)  | 9310(1)  | 21(1) |
| Si(1) | 4278(1)  | 7189(1)  | 8529(1)  | 22(1) |

---

Table 3. Bond lengths [Å] and angles [deg] for s3727na.

---

|             |            |
|-------------|------------|
| C(1)-C(6)   | 1.380(3)   |
| C(1)-C(2)   | 1.387(3)   |
| C(1)-O(1)   | 1.437(2)   |
| C(2)-C(3)   | 1.407(3)   |
| C(2)-Si(1)  | 1.8989(19) |
| C(3)-C(4)   | 1.393(3)   |
| C(3)-H(3)   | 0.9500     |
| C(4)-C(5)   | 1.389(3)   |
| C(4)-H(4)   | 0.9500     |
| C(5)-C(6)   | 1.388(3)   |
| C(5)-H(5)   | 0.9500     |
| C(6)-H(6)   | 0.9500     |
| C(7)-Si(1)  | 1.862(2)   |
| C(7)-H(7A)  | 0.9800     |
| C(7)-H(7B)  | 0.9800     |
| C(7)-H(7C)  | 0.9800     |
| C(8)-Si(1)  | 1.868(2)   |
| C(8)-H(8A)  | 0.9800     |
| C(8)-H(8B)  | 0.9800     |
| C(8)-H(8C)  | 0.9800     |
| C(9)-Si(1)  | 1.867(2)   |
| C(9)-H(9A)  | 0.9800     |
| C(9)-H(9B)  | 0.9800     |
| C(9)-H(9C)  | 0.9800     |
| C(10)-C(15) | 1.390(3)   |
| C(10)-C(11) | 1.395(3)   |
| C(10)-S(1)  | 1.7796(18) |
| C(11)-C(12) | 1.379(3)   |
| C(11)-N(1)  | 1.474(2)   |
| C(12)-C(13) | 1.376(3)   |

---



---

|             |            |
|-------------|------------|
| C(12)-H(12) | 0.9500     |
| C(13)-C(14) | 1.376(3)   |
| C(13)-N(2)  | 1.476(2)   |
| C(14)-C(15) | 1.391(3)   |
| C(14)-H(14) | 0.9500     |
| C(15)-H(15) | 0.9500     |
| N(1)-O(5)   | 1.217(2)   |
| N(1)-O(4)   | 1.215(2)   |
| N(2)-O(6)   | 1.219(2)   |
| N(2)-O(7)   | 1.224(2)   |
| O(1)-S(1)   | 1.5685(13) |
| O(2)-S(1)   | 1.4256(15) |
| O(3)-S(1)   | 1.4203(16) |

|                   |            |
|-------------------|------------|
| C(6)-C(1)-C(2)    | 125.35(18) |
| C(6)-C(1)-O(1)    | 118.97(17) |
| C(2)-C(1)-O(1)    | 115.45(16) |
| C(1)-C(2)-C(3)    | 114.81(17) |
| C(1)-C(2)-Si(1)   | 122.43(14) |
| C(3)-C(2)-Si(1)   | 122.71(14) |
| C(4)-C(3)-C(2)    | 121.89(18) |
| C(4)-C(3)-H(3)    | 119.1      |
| C(2)-C(3)-H(3)    | 119.1      |
| C(5)-C(4)-C(3)    | 120.10(19) |
| C(5)-C(4)-H(4)    | 119.9      |
| C(3)-C(4)-H(4)    | 119.9      |
| C(6)-C(5)-C(4)    | 119.96(19) |
| C(6)-C(5)-H(5)    | 120.0      |
| C(4)-C(5)-H(5)    | 120.0      |
| C(1)-C(6)-C(5)    | 117.82(18) |
| C(1)-C(6)-H(6)    | 121.1      |
| C(5)-C(6)-H(6)    | 121.1      |
| Si(1)-C(7)-H(7A)  | 109.5      |
| Si(1)-C(7)-H(7B)  | 109.5      |
| H(7A)-C(7)-H(7B)  | 109.5      |
| Si(1)-C(7)-H(7C)  | 109.5      |
| H(7A)-C(7)-H(7C)  | 109.5      |
| H(7B)-C(7)-H(7C)  | 109.5      |
| Si(1)-C(8)-H(8A)  | 109.5      |
| Si(1)-C(8)-H(8B)  | 109.5      |
| H(8A)-C(8)-H(8B)  | 109.5      |
| Si(1)-C(8)-H(8C)  | 109.5      |
| H(8A)-C(8)-H(8C)  | 109.5      |
| H(8B)-C(8)-H(8C)  | 109.5      |
| Si(1)-C(9)-H(9A)  | 109.5      |
| Si(1)-C(9)-H(9B)  | 109.5      |
| H(9A)-C(9)-H(9B)  | 109.5      |
| Si(1)-C(9)-H(9C)  | 109.5      |
| H(9A)-C(9)-H(9C)  | 109.5      |
| H(9B)-C(9)-H(9C)  | 109.5      |
| C(15)-C(10)-C(11) | 119.07(17) |
| C(15)-C(10)-S(1)  | 117.81(14) |
| C(11)-C(10)-S(1)  | 122.83(14) |
| C(12)-C(11)-C(10) | 121.67(17) |
| C(12)-C(11)-N(1)  | 116.56(17) |
| C(10)-C(11)-N(1)  | 121.76(16) |
| C(13)-C(12)-C(11) | 117.40(18) |
| C(13)-C(12)-H(12) | 121.3      |
| C(11)-C(12)-H(12) | 121.3      |
| C(14)-C(13)-C(12) | 123.22(17) |
| C(14)-C(13)-N(2)  | 118.43(17) |
| C(12)-C(13)-N(2)  | 118.35(17) |

---

---

|                   |            |
|-------------------|------------|
| C(13)-C(14)-C(15) | 118.50(18) |
| C(13)-C(14)-H(14) | 120.7      |
| C(15)-C(14)-H(14) | 120.7      |
| C(10)-C(15)-C(14) | 120.07(18) |
| C(10)-C(15)-H(15) | 120.0      |
| C(14)-C(15)-H(15) | 120.0      |
| O(5)-N(1)-O(4)    | 125.50(18) |
| O(5)-N(1)-C(11)   | 116.81(16) |
| O(4)-N(1)-C(11)   | 117.65(16) |
| O(6)-N(2)-O(7)    | 124.82(17) |
| O(6)-N(2)-C(13)   | 117.64(17) |
| O(7)-N(2)-C(13)   | 117.53(17) |
| C(1)-O(1)-S(1)    | 122.24(12) |
| O(3)-S(1)-O(2)    | 120.62(9)  |
| O(3)-S(1)-O(1)    | 106.57(8)  |
| O(2)-S(1)-O(1)    | 110.05(8)  |
| O(3)-S(1)-C(10)   | 107.23(9)  |
| O(2)-S(1)-C(10)   | 107.57(9)  |
| O(1)-S(1)-C(10)   | 103.49(8)  |
| C(7)-Si(1)-C(9)   | 109.71(10) |
| C(7)-Si(1)-C(8)   | 109.96(11) |
| C(9)-Si(1)-C(8)   | 111.24(11) |
| C(7)-Si(1)-C(2)   | 108.12(10) |
| C(9)-Si(1)-C(2)   | 109.15(9)  |
| C(8)-Si(1)-C(2)   | 108.60(9)  |

---

Symmetry transformations used to generate equivalent atoms:

Table 4. Anisotropic displacement parameters ( $\text{\AA}^2 \times 10^3$ ) for s3727na. The anisotropic displacement factor exponent takes the form:  
 $-2 \pi^2 [ h^2 a^{*2} U_{11} + \dots + 2 h k a^* b^* U_{12} ]$

---

|       | U11   | U22   | U33   | U23    | U13   | U12   |
|-------|-------|-------|-------|--------|-------|-------|
| C(1)  | 20(1) | 18(1) | 19(1) | 0(1)   | 0(1)  | 2(1)  |
| C(2)  | 20(1) | 20(1) | 18(1) | 0(1)   | 2(1)  | 2(1)  |
| C(3)  | 26(1) | 22(1) | 26(1) | -1(1)  | 4(1)  | 5(1)  |
| C(4)  | 30(1) | 19(1) | 31(1) | 2(1)   | -1(1) | 0(1)  |
| C(5)  | 27(1) | 27(1) | 25(1) | 6(1)   | 0(1)  | -6(1) |
| C(6)  | 23(1) | 32(1) | 21(1) | 1(1)   | 5(1)  | -1(1) |
| C(7)  | 28(1) | 39(1) | 40(1) | -8(1)  | 16(1) | 0(1)  |
| C(8)  | 44(1) | 27(1) | 30(1) | 5(1)   | 11(1) | 0(1)  |
| C(9)  | 27(1) | 32(1) | 40(1) | -10(1) | 8(1)  | -5(1) |
| C(10) | 18(1) | 20(1) | 18(1) | 0(1)   | 4(1)  | 5(1)  |
| C(11) | 18(1) | 18(1) | 20(1) | 2(1)   | 3(1)  | 3(1)  |
| C(12) | 23(1) | 21(1) | 20(1) | 0(1)   | 4(1)  | 3(1)  |
| C(13) | 21(1) | 24(1) | 19(1) | 4(1)   | 6(1)  | 6(1)  |
| C(14) | 19(1) | 24(1) | 29(1) | 2(1)   | 7(1)  | 1(1)  |
| C(15) | 21(1) | 24(1) | 26(1) | -4(1)  | 3(1)  | 0(1)  |
| N(1)  | 27(1) | 22(1) | 25(1) | -2(1)  | 8(1)  | -2(1) |
| N(2)  | 26(1) | 33(1) | 23(1) | 5(1)   | 9(1)  | 6(1)  |
| O(1)  | 20(1) | 21(1) | 26(1) | -4(1)  | 5(1)  | 3(1)  |
| O(2)  | 28(1) | 38(1) | 22(1) | -8(1)  | 0(1)  | 6(1)  |
| O(3)  | 35(1) | 27(1) | 28(1) | 5(1)   | 14(1) | 6(1)  |
| O(4)  | 20(1) | 30(1) | 41(1) | -2(1)  | 9(1)  | 0(1)  |
| O(5)  | 44(1) | 17(1) | 76(1) | -4(1)  | 25(1) | -4(1) |
| O(6)  | 36(1) | 46(1) | 39(1) | 5(1)   | 21(1) | -5(1) |

---

|       |       |       |       |       |       |       |
|-------|-------|-------|-------|-------|-------|-------|
| O(7)  | 40(1) | 46(1) | 29(1) | -9(1) | 15(1) | 0(1)  |
| S(1)  | 22(1) | 24(1) | 18(1) | -1(1) | 5(1)  | 5(1)  |
| Si(1) | 22(1) | 22(1) | 25(1) | -2(1) | 8(1)  | -1(1) |

Table 5. Hydrogen coordinates (  $\times 10^4$ ) and isotropic displacement parameters ( $\text{\AA}^2 \times 10^3$ ) for s3727na.

|       | x    | y     | z     | U(eq) |
|-------|------|-------|-------|-------|
| H(3)  | 3973 | 4372  | 8478  | 30    |
| H(4)  | 2951 | 2937  | 9139  | 33    |
| H(5)  | 1806 | 3659  | 10136 | 32    |
| H(6)  | 1639 | 5852  | 10409 | 30    |
| H(7A) | 5753 | 6887  | 7837  | 52    |
| H(7B) | 4955 | 5791  | 7407  | 52    |
| H(7C) | 5616 | 5719  | 8591  | 52    |
| H(8A) | 3961 | 8571  | 7031  | 50    |
| H(8B) | 3123 | 8780  | 7725  | 50    |
| H(8C) | 3053 | 7582  | 6948  | 50    |
| H(9A) | 5113 | 7699  | 10296 | 49    |
| H(9B) | 4383 | 8840  | 9811  | 49    |
| H(9C) | 5448 | 8675  | 9481  | 49    |
| H(12) | 1173 | 10508 | 12537 | 26    |
| H(14) | -845 | 7780  | 11308 | 29    |
| H(15) | -6   | 7470  | 9902  | 29    |

Table 6. Torsion angles [deg] for s3727na.

|                         |             |
|-------------------------|-------------|
| C(6)-C(1)-C(2)-C(3)     | 2.6(3)      |
| O(1)-C(1)-C(2)-C(3)     | 176.86(16)  |
| C(6)-C(1)-C(2)-Si(1)    | -174.91(15) |
| O(1)-C(1)-C(2)-Si(1)    | -0.6(2)     |
| C(1)-C(2)-C(3)-C(4)     | -0.6(3)     |
| Si(1)-C(2)-C(3)-C(4)    | 176.88(15)  |
| C(2)-C(3)-C(4)-C(5)     | -1.4(3)     |
| C(3)-C(4)-C(5)-C(6)     | 1.5(3)      |
| C(2)-C(1)-C(6)-C(5)     | -2.5(3)     |
| O(1)-C(1)-C(6)-C(5)     | -176.55(16) |
| C(4)-C(5)-C(6)-C(1)     | 0.3(3)      |
| C(15)-C(10)-C(11)-C(12) | 1.2(3)      |
| S(1)-C(10)-C(11)-C(12)  | 174.86(14)  |
| C(15)-C(10)-C(11)-N(1)  | -179.87(17) |
| S(1)-C(10)-C(11)-N(1)   | -6.2(3)     |
| C(10)-C(11)-C(12)-C(13) | 1.0(3)      |
| N(1)-C(11)-C(12)-C(13)  | -177.95(16) |
| C(11)-C(12)-C(13)-C(14) | -1.8(3)     |
| C(11)-C(12)-C(13)-N(2)  | 177.58(16)  |
| C(12)-C(13)-C(14)-C(15) | 0.3(3)      |
| N(2)-C(13)-C(14)-C(15)  | -179.09(17) |
| C(11)-C(10)-C(15)-C(14) | -2.8(3)     |
| S(1)-C(10)-C(15)-C(14)  | -176.73(15) |
| C(13)-C(14)-C(15)-C(10) | 2.1(3)      |
| C(12)-C(11)-N(1)-O(5)   | -54.5(2)    |
| C(10)-C(11)-N(1)-O(5)   | 126.5(2)    |
| C(12)-C(11)-N(1)-O(4)   | 123.05(19)  |
| C(10)-C(11)-N(1)-O(4)   | -55.9(2)    |

---

|                       |             |
|-----------------------|-------------|
| C(14)-C(13)-N(2)-O(6) | 9.1(3)      |
| C(12)-C(13)-N(2)-O(6) | -170.27(18) |
| C(14)-C(13)-N(2)-O(7) | -171.78(18) |
| C(12)-C(13)-N(2)-O(7) | 8.8(3)      |
| C(6)-C(1)-O(1)-S(1)   | -68.7(2)    |
| C(2)-C(1)-O(1)-S(1)   | 116.63(16)  |
| C(1)-O(1)-S(1)-O(3)   | -142.98(14) |
| C(1)-O(1)-S(1)-O(2)   | -10.59(16)  |
| C(1)-O(1)-S(1)-C(10)  | 104.12(14)  |
| C(15)-C(10)-S(1)-O(3) | 141.06(15)  |
| C(11)-C(10)-S(1)-O(3) | -32.66(18)  |
| C(15)-C(10)-S(1)-O(2) | 9.95(17)    |
| C(11)-C(10)-S(1)-O(2) | -163.76(15) |
| C(15)-C(10)-S(1)-O(1) | -106.52(15) |
| C(11)-C(10)-S(1)-O(1) | 79.76(16)   |
| C(1)-C(2)-Si(1)-C(7)  | 170.23(16)  |
| C(3)-C(2)-Si(1)-C(7)  | -7.06(19)   |
| C(1)-C(2)-Si(1)-C(9)  | 50.94(18)   |
| C(3)-C(2)-Si(1)-C(9)  | -126.35(17) |
| C(1)-C(2)-Si(1)-C(8)  | -70.49(17)  |
| C(3)-C(2)-Si(1)-C(8)  | 112.22(17)  |

---

Symmetry transformations used to generate equivalent atoms:

Table 7. Hydrogen bonds for s3727na [Å and deg.].

---

| D-H...A | d(D-H) | d(H...A) | d(D...A) | <(DHA) |
|---------|--------|----------|----------|--------|
|---------|--------|----------|----------|--------|

---

---

## Crystal data and structure refinement for s3883ma.

|                                   |                                                                                                                       |
|-----------------------------------|-----------------------------------------------------------------------------------------------------------------------|
| Identification code               | s3883ma                                                                                                               |
| Empirical formula                 | C14 H16 N2 O5 S Si                                                                                                    |
| Formula weight                    | 352.44                                                                                                                |
| Temperature                       | 100(2) K                                                                                                              |
| Wavelength                        | 1.54178 Å                                                                                                             |
| Crystal system, space group       | Monoclinic, P2(1)/c                                                                                                   |
| Unit cell dimensions              | a = 13.2148(2) Å    alpha = 90 deg.<br>b = 10.9938(2) Å    beta = 111.8790(10)<br>c = 12.0527(2) Å    gamma = 90 deg. |
| deg.                              |                                                                                                                       |
| Volume                            | 1624.90(5) Å <sup>3</sup>                                                                                             |
| Z, Calculated density             | 4, 1.441 Mg/m <sup>3</sup>                                                                                            |
| Absorption coefficient            | 2.726 mm <sup>-1</sup>                                                                                                |
| F(000)                            | 736                                                                                                                   |
| Crystal size                      | 0.29 x 0.19 x 0.16 mm                                                                                                 |
| Theta range for data collection   | 3.60 to 72.15 deg.                                                                                                    |
| Limiting indices                  | -16<=h<=16, -13<=k<=13, -14<=l<=14                                                                                    |
| Reflections collected / unique    | 15650 / 3176 [R(int) = 0.0266]                                                                                        |
| Completeness to theta = 66.60     | 99.7 %                                                                                                                |
| Absorption correction             | Semi-empirical from equivalents                                                                                       |
| Max. and min. transmission        | 0.6695 and 0.553297                                                                                                   |
| Refinement method                 | Full-matrix least-squares on F <sup>2</sup>                                                                           |
| Data / restraints / parameters    | 3176 / 0 / 211                                                                                                        |
| Goodness-of-fit on F <sup>2</sup> | 1.049                                                                                                                 |
| Final R indices [I>2sigma(I)]     | R1 = 0.0289, wR2 = 0.0791                                                                                             |
| R indices (all data)              | R1 = 0.0313, wR2 = 0.0807                                                                                             |
| Largest diff. peak and hole       | 0.297 and -0.403 e.Å <sup>-3</sup>                                                                                    |

Table 2. Atomic coordinates ( x 10<sup>4</sup>) and equivalent isotropic displacement parameters (Å<sup>2</sup> x 10<sup>3</sup>) for s3883ma. U(eq) is defined as one third of the trace of the orthogonalized Uij tensor.

---

x

y

z

U(eq)

---

---

|       |          |         |          |       |
|-------|----------|---------|----------|-------|
| C(1)  | 10657(1) | 2731(2) | 13186(1) | 33(1) |
| C(2)  | 9943(1)  | 1302(1) | 10871(1) | 27(1) |
| C(3)  | 11018(1) | 3837(1) | 11046(1) | 28(1) |
| C(4)  | 8708(1)  | 3572(1) | 11046(1) | 20(1) |
| C(5)  | 8008(1)  | 3505(1) | 9787(1)  | 18(1) |
| C(6)  | 6589(1)  | 4542(1) | 10321(1) | 28(1) |
| C(7)  | 7272(1)  | 4666(1) | 11458(1) | 30(1) |
| C(8)  | 8328(1)  | 4132(1) | 11825(1) | 25(1) |
| C(9)  | 6265(1)  | 4399(1) | 7099(1)  | 20(1) |
| C(10) | 5935(1)  | 5608(1) | 6960(1)  | 26(1) |
| C(11) | 6124(1)  | 6302(1) | 6099(1)  | 28(1) |
| C(12) | 6624(1)  | 5756(1) | 5407(1)  | 23(1) |
| C(13) | 6956(1)  | 4554(1) | 5537(1)  | 27(1) |
| C(14) | 6776(1)  | 3864(1) | 6405(1)  | 26(1) |
| N(1)  | 6913(1)  | 3911(1) | 9508(1)  | 21(1) |
| N(2)  | 6816(1)  | 6502(1) | 4482(1)  | 29(1) |
| O(1)  | 8269(1)  | 3114(1) | 8984(1)  | 23(1) |
| O(2)  | 6087(1)  | 2266(1) | 7968(1)  | 30(1) |
| O(3)  | 4952(1)  | 3959(1) | 8197(1)  | 33(1) |
| O(4)  | 7368(1)  | 6063(1) | 3964(1)  | 38(1) |
| O(5)  | 6415(1)  | 7516(1) | 4290(1)  | 45(1) |
| S(1)  | 5957(1)  | 3522(1) | 8156(1)  | 23(1) |
| Si(1) | 10103(1) | 2857(1) | 11520(1) | 19(1) |

---

Table 3. Bond lengths [Å] and angles [deg] for s3883ma.

---

|             |            |
|-------------|------------|
| C(1)-Si(1)  | 1.8686(16) |
| C(1)-H(1A)  | 0.9800     |
| C(1)-H(1B)  | 0.9800     |
| C(1)-H(1C)  | 0.9800     |
| C(2)-Si(1)  | 1.8595(15) |
| C(2)-H(2A)  | 0.9800     |
| C(2)-H(2B)  | 0.9800     |
| C(2)-H(2C)  | 0.9800     |
| C(3)-Si(1)  | 1.8617(15) |
| C(3)-H(3A)  | 0.9800     |
| C(3)-H(3B)  | 0.9800     |
| C(3)-H(3C)  | 0.9800     |
| C(4)-C(8)   | 1.3652(19) |
| C(4)-C(5)   | 1.4553(19) |
| C(4)-Si(1)  | 1.8867(14) |
| C(5)-O(1)   | 1.2198(16) |
| C(5)-N(1)   | 1.4293(17) |
| C(6)-C(7)   | 1.338(2)   |
| C(6)-N(1)   | 1.3919(18) |
| C(6)-H(6)   | 0.9500     |
| C(7)-C(8)   | 1.424(2)   |
| C(7)-H(7)   | 0.9500     |
| C(8)-H(8)   | 0.9500     |
| C(9)-C(14)  | 1.387(2)   |
| C(9)-C(10)  | 1.389(2)   |
| C(9)-S(1)   | 1.7624(14) |
| C(10)-C(11) | 1.384(2)   |
| C(10)-H(10) | 0.9500     |
| C(11)-C(12) | 1.380(2)   |
| C(11)-H(11) | 0.9500     |
| C(12)-C(13) | 1.383(2)   |
| C(12)-N(2)  | 1.4793(19) |

---

---

|                   |            |
|-------------------|------------|
| C(13)-C(14)       | 1.383(2)   |
| C(13)-H(13)       | 0.9500     |
| C(14)-H(14)       | 0.9500     |
| N(1)-S(1)         | 1.7027(12) |
| N(2)-O(5)         | 1.2194(19) |
| N(2)-O(4)         | 1.2221(18) |
| O(2)-S(1)         | 1.4203(11) |
| O(3)-S(1)         | 1.4304(11) |
| Si(1)-C(1)-H(1A)  | 109.5      |
| Si(1)-C(1)-H(1B)  | 109.5      |
| H(1A)-C(1)-H(1B)  | 109.5      |
| Si(1)-C(1)-H(1C)  | 109.5      |
| H(1A)-C(1)-H(1C)  | 109.5      |
| H(1B)-C(1)-H(1C)  | 109.5      |
| Si(1)-C(2)-H(2A)  | 109.5      |
| Si(1)-C(2)-H(2B)  | 109.5      |
| H(2A)-C(2)-H(2B)  | 109.5      |
| Si(1)-C(2)-H(2C)  | 109.5      |
| H(2A)-C(2)-H(2C)  | 109.5      |
| H(2B)-C(2)-H(2C)  | 109.5      |
| Si(1)-C(3)-H(3A)  | 109.5      |
| Si(1)-C(3)-H(3B)  | 109.5      |
| H(3A)-C(3)-H(3B)  | 109.5      |
| Si(1)-C(3)-H(3C)  | 109.5      |
| H(3A)-C(3)-H(3C)  | 109.5      |
| H(3B)-C(3)-H(3C)  | 109.5      |
| C(8)-C(4)-C(5)    | 119.09(13) |
| C(8)-C(4)-Si(1)   | 123.24(11) |
| C(5)-C(4)-Si(1)   | 117.66(10) |
| O(1)-C(5)-N(1)    | 118.96(12) |
| O(1)-C(5)-C(4)    | 125.95(12) |
| N(1)-C(5)-C(4)    | 115.07(11) |
| C(7)-C(6)-N(1)    | 120.31(13) |
| C(7)-C(6)-H(6)    | 119.8      |
| N(1)-C(6)-H(6)    | 119.8      |
| C(6)-C(7)-C(8)    | 119.02(13) |
| C(6)-C(7)-H(7)    | 120.5      |
| C(8)-C(7)-H(7)    | 120.5      |
| C(4)-C(8)-C(7)    | 122.78(14) |
| C(4)-C(8)-H(8)    | 118.6      |
| C(7)-C(8)-H(8)    | 118.6      |
| C(14)-C(9)-C(10)  | 122.33(13) |
| C(14)-C(9)-S(1)   | 119.93(11) |
| C(10)-C(9)-S(1)   | 117.67(11) |
| C(11)-C(10)-C(9)  | 118.83(13) |
| C(11)-C(10)-H(10) | 120.6      |
| C(9)-C(10)-H(10)  | 120.6      |
| C(12)-C(11)-C(10) | 118.30(13) |
| C(12)-C(11)-H(11) | 120.8      |
| C(10)-C(11)-H(11) | 120.8      |
| C(11)-C(12)-C(13) | 123.40(14) |
| C(11)-C(12)-N(2)  | 118.02(13) |
| C(13)-C(12)-N(2)  | 118.58(13) |
| C(14)-C(13)-C(12) | 118.25(13) |
| C(14)-C(13)-H(13) | 120.9      |
| C(12)-C(13)-H(13) | 120.9      |
| C(13)-C(14)-C(9)  | 118.88(13) |
| C(13)-C(14)-H(14) | 120.6      |
| C(9)-C(14)-H(14)  | 120.6      |
| C(6)-N(1)-C(5)    | 122.70(12) |
| C(6)-N(1)-S(1)    | 119.07(10) |

---

---

|                 |            |
|-----------------|------------|
| C(5)-N(1)-S(1)  | 118.11(9)  |
| O(5)-N(2)-O(4)  | 124.28(14) |
| O(5)-N(2)-C(12) | 117.76(13) |
| O(4)-N(2)-C(12) | 117.96(13) |
| O(2)-S(1)-O(3)  | 120.07(7)  |
| O(2)-S(1)-N(1)  | 107.86(6)  |
| O(3)-S(1)-N(1)  | 104.44(6)  |
| O(2)-S(1)-C(9)  | 110.05(7)  |
| O(3)-S(1)-C(9)  | 107.98(7)  |
| N(1)-S(1)-C(9)  | 105.39(6)  |
| C(2)-Si(1)-C(3) | 112.84(7)  |
| C(2)-Si(1)-C(1) | 108.74(7)  |
| C(3)-Si(1)-C(1) | 109.50(8)  |
| C(2)-Si(1)-C(4) | 108.11(6)  |
| C(3)-Si(1)-C(4) | 109.85(6)  |
| C(1)-Si(1)-C(4) | 107.66(7)  |

---

Symmetry transformations used to generate equivalent atoms:

Table 4. Anisotropic displacement parameters ( $\text{\AA}^2 \times 10^3$ ) for s3883ma. The anisotropic displacement factor exponent takes the form:  $-2 \pi^2 [ h^2 a^{*2} U_{11} + \dots + 2 h k a^* b^* U_{12} ]$

---

|       | U11   | U22   | U33   | U23   | U13   | U12   |
|-------|-------|-------|-------|-------|-------|-------|
| C(1)  | 32(1) | 40(1) | 22(1) | 2(1)  | 3(1)  | 3(1)  |
| C(2)  | 26(1) | 20(1) | 32(1) | 0(1)  | 8(1)  | 1(1)  |
| C(3)  | 23(1) | 26(1) | 34(1) | -1(1) | 10(1) | -4(1) |
| C(4)  | 21(1) | 17(1) | 20(1) | 0(1)  | 7(1)  | -3(1) |
| C(5)  | 18(1) | 16(1) | 22(1) | 1(1)  | 8(1)  | -1(1) |
| C(6)  | 24(1) | 29(1) | 35(1) | -2(1) | 16(1) | 4(1)  |
| C(7)  | 33(1) | 32(1) | 32(1) | -8(1) | 18(1) | 1(1)  |
| C(8)  | 29(1) | 25(1) | 22(1) | -4(1) | 10(1) | -3(1) |
| C(9)  | 15(1) | 22(1) | 20(1) | -1(1) | 2(1)  | 0(1)  |
| C(10) | 26(1) | 26(1) | 27(1) | -2(1) | 10(1) | 6(1)  |
| C(11) | 30(1) | 22(1) | 29(1) | 1(1)  | 9(1)  | 7(1)  |
| C(12) | 19(1) | 28(1) | 18(1) | 0(1)  | 2(1)  | -1(1) |
| C(13) | 26(1) | 30(1) | 25(1) | -5(1) | 10(1) | 4(1)  |
| C(14) | 26(1) | 22(1) | 28(1) | -2(1) | 8(1)  | 5(1)  |
| N(1)  | 17(1) | 23(1) | 23(1) | 0(1)  | 8(1)  | 1(1)  |
| N(2)  | 27(1) | 36(1) | 20(1) | 0(1)  | 2(1)  | -5(1) |
| O(1)  | 21(1) | 28(1) | 20(1) | -1(1) | 8(1)  | 4(1)  |
| O(2)  | 28(1) | 24(1) | 33(1) | 0(1)  | 5(1)  | -7(1) |
| O(3)  | 16(1) | 45(1) | 37(1) | 4(1)  | 9(1)  | 0(1)  |
| O(4)  | 36(1) | 53(1) | 28(1) | -2(1) | 15(1) | -4(1) |
| O(5)  | 60(1) | 37(1) | 37(1) | 13(1) | 17(1) | 8(1)  |
| S(1)  | 15(1) | 25(1) | 26(1) | 1(1)  | 5(1)  | -2(1) |
| Si(1) | 18(1) | 19(1) | 18(1) | 0(1)  | 4(1)  | -1(1) |

---

Table 5. Hydrogen coordinates ( $\times 10^4$ ) and isotropic displacement parameters ( $\text{\AA}^2 \times 10^3$ ) for s3883ma.

---

|  | x | y | z | U(eq) |
|--|---|---|---|-------|
|--|---|---|---|-------|

---



---

|       |       |      |       |    |
|-------|-------|------|-------|----|
| H(1A) | 11347 | 2281 | 13452 | 50 |
| H(1B) | 10132 | 2298 | 13440 | 50 |
| H(1C) | 10782 | 3547 | 13538 | 50 |
| H(2A) | 9520  | 1343 | 10009 | 40 |
| H(2B) | 9562  | 785  | 11252 | 40 |
| H(2C) | 10664 | 957  | 11009 | 40 |
| H(3A) | 11720 | 3426 | 11228 | 41 |
| H(3B) | 11135 | 4613 | 11476 | 41 |
| H(3C) | 10682 | 3988 | 10183 | 41 |
| H(6)  | 5879  | 4887 | 10067 | 33 |
| H(7)  | 7056  | 5104 | 12012 | 37 |
| H(8)  | 8787  | 4166 | 12646 | 30 |
| H(10) | 5586  | 5951 | 7447  | 31 |
| H(11) | 5914  | 7133 | 5987  | 33 |
| H(13) | 7298  | 4211 | 5042  | 32 |
| H(14) | 6999  | 3037 | 6524  | 31 |

---

Table 6. Torsion angles [deg] for s3883ma.

---

|                         |             |
|-------------------------|-------------|
| C(8)-C(4)-C(5)-O(1)     | 174.27(13)  |
| Si(1)-C(4)-C(5)-O(1)    | -6.33(18)   |
| C(8)-C(4)-C(5)-N(1)     | -7.57(18)   |
| Si(1)-C(4)-C(5)-N(1)    | 171.84(9)   |
| N(1)-C(6)-C(7)-C(8)     | -0.7(2)     |
| C(5)-C(4)-C(8)-C(7)     | -0.5(2)     |
| Si(1)-C(4)-C(8)-C(7)    | -179.87(12) |
| C(6)-C(7)-C(8)-C(4)     | 5.0(2)      |
| C(14)-C(9)-C(10)-C(11)  | -0.1(2)     |
| S(1)-C(9)-C(10)-C(11)   | -177.17(11) |
| C(9)-C(10)-C(11)-C(12)  | 0.7(2)      |
| C(10)-C(11)-C(12)-C(13) | -0.6(2)     |
| C(10)-C(11)-C(12)-N(2)  | 179.54(13)  |
| C(11)-C(12)-C(13)-C(14) | 0.0(2)      |
| N(2)-C(12)-C(13)-C(14)  | 179.86(13)  |
| C(12)-C(13)-C(14)-C(9)  | 0.5(2)      |
| C(10)-C(9)-C(14)-C(13)  | -0.5(2)     |
| S(1)-C(9)-C(14)-C(13)   | 176.50(11)  |
| C(7)-C(6)-N(1)-C(5)     | -8.2(2)     |
| C(7)-C(6)-N(1)-S(1)     | 167.76(12)  |
| O(1)-C(5)-N(1)-C(6)     | -169.62(13) |
| C(4)-C(5)-N(1)-C(6)     | 12.07(18)   |
| O(1)-C(5)-N(1)-S(1)     | 14.43(16)   |
| C(4)-C(5)-N(1)-S(1)     | -163.88(9)  |
| C(11)-C(12)-N(2)-O(5)   | -8.0(2)     |
| C(13)-C(12)-N(2)-O(5)   | 172.20(14)  |
| C(11)-C(12)-N(2)-O(4)   | 171.73(14)  |
| C(13)-C(12)-N(2)-O(4)   | -8.1(2)     |
| C(6)-N(1)-S(1)-O(2)     | -130.05(11) |
| C(5)-N(1)-S(1)-O(2)     | 46.05(11)   |
| C(6)-N(1)-S(1)-O(3)     | -1.25(12)   |
| C(5)-N(1)-S(1)-O(3)     | 174.85(10)  |
| C(6)-N(1)-S(1)-C(9)     | 112.42(11)  |
| C(5)-N(1)-S(1)-C(9)     | -71.48(11)  |
| C(14)-C(9)-S(1)-O(2)    | -12.37(13)  |
| C(10)-C(9)-S(1)-O(2)    | 164.77(11)  |
| C(14)-C(9)-S(1)-O(3)    | -145.15(12) |
| C(10)-C(9)-S(1)-O(3)    | 31.99(13)   |
| C(14)-C(9)-S(1)-N(1)    | 103.67(12)  |
| C(10)-C(9)-S(1)-N(1)    | -79.19(12)  |

---

---

|                      |             |
|----------------------|-------------|
| C(8)-C(4)-Si(1)-C(2) | 130.89(12)  |
| C(5)-C(4)-Si(1)-C(2) | -48.48(12)  |
| C(8)-C(4)-Si(1)-C(3) | -105.59(13) |
| C(5)-C(4)-Si(1)-C(3) | 75.03(11)   |
| C(8)-C(4)-Si(1)-C(1) | 13.58(14)   |
| C(5)-C(4)-Si(1)-C(1) | -165.80(10) |

---

Symmetry transformations used to generate equivalent atoms:

Table 7. Hydrogen bonds for s3883ma [A and deg.].

---

| D-H...A | d(D-H) | d(H...A) | d(D...A) | <(DHA) |
|---------|--------|----------|----------|--------|
|---------|--------|----------|----------|--------|

---

---

## Crystal data and structure refinement for s3776na.

|                                   |                                                                                                                        |
|-----------------------------------|------------------------------------------------------------------------------------------------------------------------|
| Identification code               | s3776na                                                                                                                |
| Empirical formula                 | C12 H9 N O3                                                                                                            |
| Formula weight                    | 215.20                                                                                                                 |
| Temperature                       | 100(2) K                                                                                                               |
| Wavelength                        | 1.54178 Å                                                                                                              |
| Crystal system, space group       | Monoclinic, Cc                                                                                                         |
| Unit cell dimensions              | a = 20.5236(9) Å    alpha = 90 deg.<br>b = 7.6948(3) Å    beta = 96.529(2) deg.<br>c = 18.8253(9) Å    gamma = 90 deg. |
| Volume                            | 2953.7(2) Å <sup>3</sup>                                                                                               |
| Z, Calculated density             | 12, 1.452 Mg/m <sup>3</sup>                                                                                            |
| Absorption coefficient            | 0.881 mm <sup>-1</sup>                                                                                                 |
| F(000)                            | 1344                                                                                                                   |
| Crystal size                      | 0.22 x 0.15 x 0.07 mm                                                                                                  |
| Theta range for data collection   | 4.34 to 70.00 deg.                                                                                                     |
| Limiting indices                  | -24<=h<=23, -8<=k<=9, -21<=l<=22                                                                                       |
| Reflections collected / unique    | 6146 / 3891 [R(int) = 0.0421]                                                                                          |
| Completeness to theta = 66.60     | 98.7 %                                                                                                                 |
| Absorption correction             | Semi-empirical from equivalents                                                                                        |
| Max. and min. transmission        | 0.9409 and 0.659741                                                                                                    |
| Refinement method                 | Full-matrix least-squares on F <sup>2</sup>                                                                            |
| Data / restraints / parameters    | 3891 / 2 / 437                                                                                                         |
| Goodness-of-fit on F <sup>2</sup> | 1.033                                                                                                                  |
| Final R indices [I>2sigma(I)]     | R1 = 0.0441, wR2 = 0.1187                                                                                              |
| R indices (all data)              | R1 = 0.0465, wR2 = 0.1211                                                                                              |
| Absolute structure parameter      | 0.06(19)                                                                                                               |
| Largest diff. peak and hole       | 0.379 and -0.342 e.Å <sup>-3</sup>                                                                                     |

Table 2. Atomic coordinates ( x 10<sup>4</sup>) and equivalent isotropic displacement parameters (Å<sup>2</sup> x 10<sup>3</sup>) for s3776na.  
U(eq) is defined as one third of the trace of the orthogonalized Uij tensor.

---

|       | x       | y        | z       | U(eq) |
|-------|---------|----------|---------|-------|
| C(1)  | 6902(1) | 3541(3)  | 2177(2) | 17(1) |
| C(2)  | 6826(1) | 4116(3)  | 2875(2) | 14(1) |
| C(3)  | 6756(1) | 5900(3)  | 2983(2) | 18(1) |
| C(4)  | 6758(1) | 7091(4)  | 2428(2) | 21(1) |
| C(5)  | 6824(1) | 6491(4)  | 1749(2) | 22(1) |
| C(6)  | 6897(1) | 4728(4)  | 1622(2) | 19(1) |
| C(7)  | 6837(1) | 2882(4)  | 3479(2) | 15(1) |
| C(8)  | 6499(1) | 1302(3)  | 3404(1) | 15(1) |
| C(9)  | 6527(1) | 115(3)   | 3958(2) | 16(1) |
| C(10) | 6891(1) | 540(3)   | 4600(2) | 15(1) |
| C(11) | 7213(1) | 2119(3)  | 4710(2) | 15(1) |
| C(12) | 7186(1) | 3279(3)  | 4145(2) | 16(1) |
| C(13) | 5231(1) | 1455(3)  | 6174(2) | 17(1) |
| C(14) | 5292(1) | 889(3)   | 5477(2) | 17(1) |
| C(15) | 5348(1) | -908(3)  | 5365(2) | 18(1) |
| C(16) | 5351(1) | -2089(4) | 5922(2) | 20(1) |
| C(17) | 5293(1) | -1496(4) | 6610(2) | 21(1) |
| C(18) | 5231(1) | 275(4)   | 6733(2) | 21(1) |
| C(19) | 5276(1) | 2117(3)  | 4871(2) | 16(1) |
| C(20) | 4902(1) | 1743(3)  | 4217(2) | 17(1) |
| C(21) | 4859(1) | 2922(3)  | 3658(2) | 17(1) |
| C(22) | 5199(1) | 4479(4)  | 3756(2) | 15(1) |
| C(23) | 5590(1) | 4870(3)  | 4386(2) | 17(1) |
| C(24) | 5629(1) | 3683(3)  | 4936(2) | 17(1) |
| C(25) | 8302(1) | 8650(4)  | 4125(2) | 19(1) |
| C(26) | 8591(1) | 8907(4)  | 4831(2) | 18(1) |
| C(27) | 8932(1) | 10459(3) | 4977(2) | 19(1) |
| C(28) | 8969(1) | 11722(3) | 4464(2) | 22(1) |
| C(29) | 8655(1) | 11484(4) | 3777(2) | 22(1) |
| C(30) | 8326(1) | 9937(4)  | 3609(2) | 23(1) |
| C(31) | 8554(1) | 7610(3)  | 5413(2) | 17(1) |
| C(32) | 8578(1) | 5818(3)  | 5292(2) | 18(1) |
| C(33) | 8568(1) | 4634(4)  | 5840(2) | 20(1) |
| C(34) | 8528(1) | 5254(3)  | 6530(2) | 22(1) |
| C(35) | 8509(2) | 7014(3)  | 6675(2) | 21(1) |
| C(36) | 8522(1) | 8191(3)  | 6114(2) | 20(1) |
| N(1)  | 6939(1) | -729(3)  | 5178(1) | 17(1) |
| N(2)  | 5124(1) | 5777(3)  | 3190(1) | 19(1) |
| N(3)  | 8512(1) | 4008(3)  | 7107(1) | 26(1) |
| O(1)  | 7003(1) | 1813(2)  | 2087(1) | 22(1) |
| O(2)  | 7130(1) | -212(3)  | 5786(1) | 23(1) |
| O(3)  | 6782(1) | -2252(2) | 5036(1) | 24(1) |
| O(4)  | 5150(1) | 3195(2)  | 6278(1) | 20(1) |
| O(5)  | 4889(1) | 5314(3)  | 2586(1) | 27(1) |
| O(6)  | 5297(1) | 7271(2)  | 3333(1) | 24(1) |
| O(7)  | 8522(1) | 2455(3)  | 6968(1) | 38(1) |
| O(8)  | 8481(1) | 4567(3)  | 7713(1) | 36(1) |
| O(9)  | 7991(1) | 7129(3)  | 3958(1) | 31(1) |

Table 3. Bond lengths [Å] and angles [deg] for s3776na.

|           |          |
|-----------|----------|
| C(1)-O(1) | 1.359(3) |
| C(1)-C(6) | 1.387(4) |
| C(1)-C(2) | 1.413(4) |
| C(2)-C(3) | 1.398(4) |
| C(2)-C(7) | 1.479(4) |
| C(3)-C(4) | 1.390(4) |

---

|             |          |
|-------------|----------|
| C(3)-H(3)   | 0.9500   |
| C(4)-C(5)   | 1.380(4) |
| C(4)-H(4)   | 0.9500   |
| C(5)-C(6)   | 1.389(4) |
| C(5)-H(5)   | 0.9500   |
| C(6)-H(6)   | 0.9500   |
| C(7)-C(8)   | 1.399(4) |
| C(7)-C(12)  | 1.404(4) |
| C(8)-C(9)   | 1.384(4) |
| C(8)-H(8)   | 0.9500   |
| C(9)-C(10)  | 1.386(4) |
| C(9)-H(9)   | 0.9500   |
| C(10)-C(11) | 1.386(4) |
| C(10)-N(1)  | 1.457(3) |
| C(11)-C(12) | 1.386(4) |
| C(11)-H(11) | 0.9500   |
| C(12)-H(12) | 0.9500   |
| C(13)-O(4)  | 1.366(3) |
| C(13)-C(18) | 1.390(4) |
| C(13)-C(14) | 1.402(4) |
| C(14)-C(15) | 1.406(4) |
| C(14)-C(19) | 1.480(4) |
| C(15)-C(16) | 1.387(4) |
| C(15)-H(15) | 0.9500   |
| C(16)-C(17) | 1.389(4) |
| C(16)-H(16) | 0.9500   |
| C(17)-C(18) | 1.391(4) |
| C(17)-H(17) | 0.9500   |
| C(18)-H(18) | 0.9500   |
| C(19)-C(20) | 1.404(4) |
| C(19)-C(24) | 1.404(4) |
| C(20)-C(21) | 1.385(4) |
| C(20)-H(20) | 0.9500   |
| C(21)-C(22) | 1.388(4) |
| C(21)-H(21) | 0.9500   |
| C(22)-C(23) | 1.386(4) |
| C(22)-N(2)  | 1.456(3) |
| C(23)-C(24) | 1.376(4) |
| C(23)-H(23) | 0.9500   |
| C(24)-H(24) | 0.9500   |
| C(25)-O(9)  | 1.352(3) |
| C(25)-C(30) | 1.392(4) |
| C(25)-C(26) | 1.405(4) |
| C(26)-C(27) | 1.395(4) |
| C(26)-C(31) | 1.491(4) |
| C(27)-C(28) | 1.378(4) |
| C(27)-H(27) | 0.9500   |
| C(28)-C(29) | 1.389(4) |
| C(28)-H(28) | 0.9500   |
| C(29)-C(30) | 1.387(4) |
| C(29)-H(29) | 0.9500   |
| C(30)-H(30) | 0.9500   |
| C(31)-C(32) | 1.400(4) |
| C(31)-C(36) | 1.401(4) |
| C(32)-C(33) | 1.379(4) |
| C(32)-H(32) | 0.9500   |
| C(33)-C(34) | 1.395(4) |
| C(33)-H(33) | 0.9500   |
| C(34)-C(35) | 1.383(4) |
| C(34)-N(3)  | 1.452(4) |
| C(35)-C(36) | 1.394(4) |
| C(35)-H(35) | 0.9500   |

---

---

|                   |          |
|-------------------|----------|
| C(36)-H(36)       | 0.9500   |
| N(1)-O(2)         | 1.231(3) |
| N(1)-O(3)         | 1.236(3) |
| N(2)-O(6)         | 1.224(3) |
| N(2)-O(5)         | 1.237(3) |
| N(3)-O(7)         | 1.224(3) |
| N(3)-O(8)         | 1.227(4) |
| O(1)-H(1)         | 0.8400   |
| O(4)-H(4A)        | 0.8400   |
| O(9)-H(9A)        | 0.8400   |
| O(1)-C(1)-C(6)    | 122.6(3) |
| O(1)-C(1)-C(2)    | 117.2(2) |
| C(6)-C(1)-C(2)    | 120.2(2) |
| C(3)-C(2)-C(1)    | 117.8(2) |
| C(3)-C(2)-C(7)    | 120.8(3) |
| C(1)-C(2)-C(7)    | 121.4(2) |
| C(4)-C(3)-C(2)    | 122.0(3) |
| C(4)-C(3)-H(3)    | 119.0    |
| C(2)-C(3)-H(3)    | 119.0    |
| C(5)-C(4)-C(3)    | 119.0(3) |
| C(5)-C(4)-H(4)    | 120.5    |
| C(3)-C(4)-H(4)    | 120.5    |
| C(4)-C(5)-C(6)    | 120.7(3) |
| C(4)-C(5)-H(5)    | 119.7    |
| C(6)-C(5)-H(5)    | 119.7    |
| C(1)-C(6)-C(5)    | 120.3(3) |
| C(1)-C(6)-H(6)    | 119.8    |
| C(5)-C(6)-H(6)    | 119.8    |
| C(8)-C(7)-C(12)   | 118.5(2) |
| C(8)-C(7)-C(2)    | 121.0(2) |
| C(12)-C(7)-C(2)   | 120.5(2) |
| C(9)-C(8)-C(7)    | 121.2(2) |
| C(9)-C(8)-H(8)    | 119.4    |
| C(7)-C(8)-H(8)    | 119.4    |
| C(8)-C(9)-C(10)   | 118.3(2) |
| C(8)-C(9)-H(9)    | 120.8    |
| C(10)-C(9)-H(9)   | 120.8    |
| C(9)-C(10)-C(11)  | 122.5(3) |
| C(9)-C(10)-N(1)   | 118.4(2) |
| C(11)-C(10)-N(1)  | 119.1(2) |
| C(12)-C(11)-C(10) | 118.3(2) |
| C(12)-C(11)-H(11) | 120.9    |
| C(10)-C(11)-H(11) | 120.9    |
| C(11)-C(12)-C(7)  | 121.1(2) |
| C(11)-C(12)-H(12) | 119.4    |
| C(7)-C(12)-H(12)  | 119.4    |
| O(4)-C(13)-C(18)  | 121.4(3) |
| O(4)-C(13)-C(14)  | 117.6(2) |
| C(18)-C(13)-C(14) | 120.9(2) |
| C(13)-C(14)-C(15) | 117.6(3) |
| C(13)-C(14)-C(19) | 121.8(2) |
| C(15)-C(14)-C(19) | 120.5(3) |
| C(16)-C(15)-C(14) | 121.6(3) |
| C(16)-C(15)-H(15) | 119.2    |
| C(14)-C(15)-H(15) | 119.2    |
| C(15)-C(16)-C(17) | 119.7(3) |
| C(15)-C(16)-H(16) | 120.1    |
| C(17)-C(16)-H(16) | 120.1    |
| C(16)-C(17)-C(18) | 119.8(3) |
| C(16)-C(17)-H(17) | 120.1    |
| C(18)-C(17)-H(17) | 120.1    |

---

---

|                   |          |
|-------------------|----------|
| C(13)-C(18)-C(17) | 120.3(3) |
| C(13)-C(18)-H(18) | 119.8    |
| C(17)-C(18)-H(18) | 119.8    |
| C(20)-C(19)-C(24) | 118.6(3) |
| C(20)-C(19)-C(14) | 120.5(2) |
| C(24)-C(19)-C(14) | 121.0(2) |
| C(21)-C(20)-C(19) | 120.9(3) |
| C(21)-C(20)-H(20) | 119.6    |
| C(19)-C(20)-H(20) | 119.6    |
| C(20)-C(21)-C(22) | 118.5(3) |
| C(20)-C(21)-H(21) | 120.8    |
| C(22)-C(21)-H(21) | 120.8    |
| C(23)-C(22)-C(21) | 122.3(3) |
| C(23)-C(22)-N(2)  | 118.6(2) |
| C(21)-C(22)-N(2)  | 119.0(2) |
| C(24)-C(23)-C(22) | 118.5(2) |
| C(24)-C(23)-H(23) | 120.7    |
| C(22)-C(23)-H(23) | 120.7    |
| C(23)-C(24)-C(19) | 121.2(3) |
| C(23)-C(24)-H(24) | 119.4    |
| C(19)-C(24)-H(24) | 119.4    |
| O(9)-C(25)-C(30)  | 120.4(3) |
| O(9)-C(25)-C(26)  | 118.6(2) |
| C(30)-C(25)-C(26) | 120.9(3) |
| C(27)-C(26)-C(25) | 117.1(3) |
| C(27)-C(26)-C(31) | 119.6(2) |
| C(25)-C(26)-C(31) | 123.3(2) |
| C(28)-C(27)-C(26) | 122.1(3) |
| C(28)-C(27)-H(27) | 118.9    |
| C(26)-C(27)-H(27) | 118.9    |
| C(27)-C(28)-C(29) | 120.2(3) |
| C(27)-C(28)-H(28) | 119.9    |
| C(29)-C(28)-H(28) | 119.9    |
| C(30)-C(29)-C(28) | 119.2(3) |
| C(30)-C(29)-H(29) | 120.4    |
| C(28)-C(29)-H(29) | 120.4    |
| C(29)-C(30)-C(25) | 120.4(3) |
| C(29)-C(30)-H(30) | 119.8    |
| C(25)-C(30)-H(30) | 119.8    |
| C(32)-C(31)-C(36) | 118.3(2) |
| C(32)-C(31)-C(26) | 122.3(2) |
| C(36)-C(31)-C(26) | 119.4(2) |
| C(33)-C(32)-C(31) | 121.7(2) |
| C(33)-C(32)-H(32) | 119.2    |
| C(31)-C(32)-H(32) | 119.2    |
| C(32)-C(33)-C(34) | 118.6(2) |
| C(32)-C(33)-H(33) | 120.7    |
| C(34)-C(33)-H(33) | 120.7    |
| C(35)-C(34)-C(33) | 121.7(3) |
| C(35)-C(34)-N(3)  | 119.7(3) |
| C(33)-C(34)-N(3)  | 118.6(2) |
| C(34)-C(35)-C(36) | 118.9(3) |
| C(34)-C(35)-H(35) | 120.5    |
| C(36)-C(35)-H(35) | 120.5    |
| C(35)-C(36)-C(31) | 120.9(2) |
| C(35)-C(36)-H(36) | 119.6    |
| C(31)-C(36)-H(36) | 119.6    |
| O(2)-N(1)-O(3)    | 123.7(2) |
| O(2)-N(1)-C(10)   | 117.6(2) |
| O(3)-N(1)-C(10)   | 118.7(2) |
| O(6)-N(2)-O(5)    | 123.1(2) |
| O(6)-N(2)-C(22)   | 118.7(2) |

---

---

|                  |          |
|------------------|----------|
| O(5)-N(2)-C(22)  | 118.2(2) |
| O(7)-N(3)-O(8)   | 123.0(3) |
| O(7)-N(3)-C(34)  | 118.9(2) |
| O(8)-N(3)-C(34)  | 118.1(2) |
| C(1)-O(1)-H(1)   | 109.5    |
| C(13)-O(4)-H(4A) | 109.5    |
| C(25)-O(9)-H(9A) | 109.5    |

---

Symmetry transformations used to generate equivalent atoms:

Table 4. Anisotropic displacement parameters ( $\text{\AA}^2 \times 10^3$ ) for s3776na. The anisotropic displacement factor exponent takes the form:  
 $-2 \pi^2 [ h^2 a^{*2} U_{11} + \dots + 2 h k a^* b^* U_{12} ]$

---

|       | U11   | U22   | U33   | U23   | U13   | U12   |
|-------|-------|-------|-------|-------|-------|-------|
| C(1)  | 20(1) | 16(1) | 16(2) | -1(1) | 1(1)  | 0(1)  |
| C(2)  | 14(1) | 20(1) | 8(1)  | 1(1)  | 0(1)  | 0(1)  |
| C(3)  | 19(1) | 21(1) | 14(1) | -5(1) | 0(1)  | 0(1)  |
| C(4)  | 25(1) | 17(1) | 20(2) | 2(1)  | 1(1)  | 2(1)  |
| C(5)  | 26(1) | 23(2) | 16(2) | 4(1)  | 0(1)  | -2(1) |
| C(6)  | 24(1) | 24(2) | 10(1) | -2(1) | 1(1)  | -3(1) |
| C(7)  | 14(1) | 17(1) | 13(1) | -1(1) | 2(1)  | 3(1)  |
| C(8)  | 17(1) | 21(1) | 8(1)  | -1(1) | 1(1)  | 1(1)  |
| C(9)  | 18(1) | 17(1) | 16(1) | -3(1) | 4(1)  | -1(1) |
| C(10) | 16(1) | 16(1) | 13(1) | 1(1)  | 3(1)  | 4(1)  |
| C(11) | 16(1) | 19(1) | 10(1) | -4(1) | -1(1) | -1(1) |
| C(12) | 19(1) | 17(1) | 12(1) | -2(1) | 2(1)  | -1(1) |
| C(13) | 16(1) | 19(1) | 17(2) | -5(1) | 0(1)  | -2(1) |
| C(14) | 15(1) | 17(1) | 18(1) | -1(1) | -1(1) | 0(1)  |
| C(15) | 19(1) | 20(1) | 14(2) | -1(1) | 0(1)  | 2(1)  |
| C(16) | 22(1) | 17(1) | 21(2) | 1(1)  | -2(1) | -1(1) |
| C(17) | 24(1) | 21(2) | 17(2) | 5(1)  | -2(1) | 2(1)  |
| C(18) | 23(1) | 23(2) | 17(2) | 0(1)  | 2(1)  | 2(1)  |
| C(19) | 17(1) | 17(1) | 14(1) | -4(1) | 4(1)  | 2(1)  |
| C(20) | 18(1) | 17(1) | 15(1) | -2(1) | 3(1)  | -1(1) |
| C(21) | 17(1) | 21(1) | 14(1) | -3(1) | 2(1)  | 1(1)  |
| C(22) | 18(1) | 19(1) | 9(1)  | 0(1)  | 4(1)  | 2(1)  |
| C(23) | 20(1) | 16(1) | 15(1) | -1(1) | 4(1)  | 0(1)  |
| C(24) | 16(1) | 20(1) | 15(1) | -4(1) | 1(1)  | 0(1)  |
| C(25) | 21(1) | 20(1) | 16(2) | 0(1)  | 2(1)  | 1(1)  |
| C(26) | 18(1) | 21(1) | 14(1) | -2(1) | 3(1)  | 3(1)  |
| C(27) | 18(1) | 21(1) | 17(1) | 0(1)  | 2(1)  | 3(1)  |
| C(28) | 23(1) | 20(1) | 24(2) | 0(1)  | 5(1)  | 2(1)  |
| C(29) | 26(1) | 24(1) | 18(2) | 4(1)  | 8(1)  | 6(1)  |
| C(30) | 24(1) | 32(2) | 14(2) | -1(1) | 2(1)  | 7(1)  |
| C(31) | 14(1) | 22(1) | 15(1) | -2(1) | -1(1) | 0(1)  |
| C(32) | 22(1) | 19(1) | 13(1) | -2(1) | 3(1)  | -1(1) |
| C(33) | 20(1) | 17(1) | 22(2) | 0(1)  | 0(1)  | -1(1) |
| C(34) | 20(1) | 25(1) | 19(2) | 3(1)  | -1(1) | 0(1)  |
| C(35) | 25(1) | 27(1) | 12(1) | -1(1) | 3(1)  | 7(1)  |
| C(36) | 25(1) | 21(1) | 14(1) | -1(1) | 4(1)  | 3(1)  |
| N(1)  | 18(1) | 20(1) | 13(1) | 1(1)  | 3(1)  | 2(1)  |
| N(2)  | 22(1) | 21(1) | 16(1) | 1(1)  | 6(1)  | 0(1)  |
| N(3)  | 32(1) | 26(1) | 20(1) | 6(1)  | 3(1)  | 3(1)  |
| O(1)  | 38(1) | 18(1) | 9(1)  | -3(1) | 6(1)  | 2(1)  |
| O(2)  | 35(1) | 24(1) | 11(1) | 1(1)  | 1(1)  | -1(1) |

---



|      |       |       |       |       |       |        |
|------|-------|-------|-------|-------|-------|--------|
| O(3) | 32(1) | 16(1) | 24(1) | 1(1)  | 3(1)  | -2(1)  |
| O(4) | 31(1) | 18(1) | 12(1) | -2(1) | 1(1)  | 1(1)   |
| O(5) | 42(1) | 28(1) | 10(1) | 2(1)  | -2(1) | -5(1)  |
| O(6) | 33(1) | 19(1) | 22(1) | 4(1)  | 2(1)  | -4(1)  |
| O(7) | 65(2) | 21(1) | 30(1) | 6(1)  | 13(1) | 6(1)   |
| O(8) | 59(2) | 35(1) | 15(1) | 5(1)  | 4(1)  | 4(1)   |
| O(9) | 43(1) | 34(1) | 14(1) | -3(1) | 0(1)  | -13(1) |

Table 5. Hydrogen coordinates (  $\times 10^4$ ) and isotropic displacement parameters ( $\text{\AA}^2 \times 10^3$ ) for s3776na.

|       | x    | y     | z    | U(eq) |
|-------|------|-------|------|-------|
| H(3)  | 6706 | 6311  | 3449 | 22    |
| H(4)  | 6715 | 8299  | 2515 | 25    |
| H(5)  | 6819 | 7293  | 1365 | 26    |
| H(6)  | 6944 | 4333  | 1152 | 23    |
| H(8)  | 6244 | 1040  | 2963 | 18    |
| H(9)  | 6302 | -964  | 3901 | 20    |
| H(11) | 7445 | 2398  | 5161 | 18    |
| H(12) | 7407 | 4362  | 4209 | 19    |
| H(15) | 5384 | -1325 | 4896 | 21    |
| H(16) | 5393 | -3297 | 5835 | 24    |
| H(17) | 5297 | -2297 | 6994 | 26    |
| H(18) | 5188 | 681   | 7202 | 25    |
| H(20) | 4676 | 666   | 4157 | 20    |
| H(21) | 4602 | 2673  | 3218 | 21    |
| H(23) | 5824 | 5935  | 4437 | 20    |
| H(24) | 5900 | 3926  | 5368 | 20    |
| H(27) | 9145 | 10652 | 5445 | 22    |
| H(28) | 9210 | 12757 | 4580 | 27    |
| H(29) | 8665 | 12370 | 3427 | 26    |
| H(30) | 8116 | 9754  | 3139 | 28    |
| H(32) | 8601 | 5407  | 4819 | 21    |
| H(33) | 8588 | 3421  | 5750 | 24    |
| H(35) | 8487 | 7415  | 7149 | 25    |
| H(36) | 8509 | 9403  | 6207 | 24    |
| H(1)  | 7023 | 1605  | 1652 | 32    |
| H(4A) | 5108 | 3382  | 6710 | 24(8) |
| H(9A) | 7994 | 6928  | 3520 | 46    |

Table 6. Torsion angles [deg] for s3776na.

|                     |           |
|---------------------|-----------|
| O(1)-C(1)-C(2)-C(3) | 176.7(2)  |
| C(6)-C(1)-C(2)-C(3) | -0.9(4)   |
| O(1)-C(1)-C(2)-C(7) | -1.6(4)   |
| C(6)-C(1)-C(2)-C(7) | -179.2(2) |
| C(1)-C(2)-C(3)-C(4) | 0.2(4)    |
| C(7)-C(2)-C(3)-C(4) | 178.5(2)  |
| C(2)-C(3)-C(4)-C(5) | 0.7(4)    |
| C(3)-C(4)-C(5)-C(6) | -1.0(4)   |
| O(1)-C(1)-C(6)-C(5) | -176.8(3) |
| C(2)-C(1)-C(6)-C(5) | 0.6(4)    |
| C(4)-C(5)-C(6)-C(1) | 0.3(4)    |
| C(3)-C(2)-C(7)-C(8) | 137.9(3)  |
| C(1)-C(2)-C(7)-C(8) | -43.8(3)  |

---

|                         |           |
|-------------------------|-----------|
| C(3)-C(2)-C(7)-C(12)    | -41.6(3)  |
| C(1)-C(2)-C(7)-C(12)    | 136.7(3)  |
| C(12)-C(7)-C(8)-C(9)    | -2.8(4)   |
| C(2)-C(7)-C(8)-C(9)     | 177.6(2)  |
| C(7)-C(8)-C(9)-C(10)    | 1.2(4)    |
| C(8)-C(9)-C(10)-C(11)   | 1.6(4)    |
| C(8)-C(9)-C(10)-N(1)    | -178.1(2) |
| C(9)-C(10)-C(11)-C(12)  | -2.5(4)   |
| N(1)-C(10)-C(11)-C(12)  | 177.2(2)  |
| C(10)-C(11)-C(12)-C(7)  | 0.7(4)    |
| C(8)-C(7)-C(12)-C(11)   | 1.9(4)    |
| C(2)-C(7)-C(12)-C(11)   | -178.6(2) |
| O(4)-C(13)-C(14)-C(15)  | -177.4(2) |
| C(18)-C(13)-C(14)-C(15) | 0.4(4)    |
| O(4)-C(13)-C(14)-C(19)  | 0.6(4)    |
| C(18)-C(13)-C(14)-C(19) | 178.4(2)  |
| C(13)-C(14)-C(15)-C(16) | -0.7(4)   |
| C(19)-C(14)-C(15)-C(16) | -178.8(2) |
| C(14)-C(15)-C(16)-C(17) | 0.4(4)    |
| C(15)-C(16)-C(17)-C(18) | 0.2(4)    |
| O(4)-C(13)-C(18)-C(17)  | 177.9(2)  |
| C(14)-C(13)-C(18)-C(17) | 0.2(4)    |
| C(16)-C(17)-C(18)-C(13) | -0.5(4)   |
| C(13)-C(14)-C(19)-C(20) | -135.2(3) |
| C(15)-C(14)-C(19)-C(20) | 42.8(4)   |
| C(13)-C(14)-C(19)-C(24) | 44.4(4)   |
| C(15)-C(14)-C(19)-C(24) | -137.6(3) |
| C(24)-C(19)-C(20)-C(21) | -2.8(4)   |
| C(14)-C(19)-C(20)-C(21) | 176.8(2)  |
| C(19)-C(20)-C(21)-C(22) | 0.7(4)    |
| C(20)-C(21)-C(22)-C(23) | 1.4(4)    |
| C(20)-C(21)-C(22)-N(2)  | -176.1(2) |
| C(21)-C(22)-C(23)-C(24) | -1.2(4)   |
| N(2)-C(22)-C(23)-C(24)  | 176.3(2)  |
| C(22)-C(23)-C(24)-C(19) | -1.0(4)   |
| C(20)-C(19)-C(24)-C(23) | 3.0(4)    |
| C(14)-C(19)-C(24)-C(23) | -176.6(2) |
| O(9)-C(25)-C(26)-C(27)  | 177.3(2)  |
| C(30)-C(25)-C(26)-C(27) | -3.5(4)   |
| O(9)-C(25)-C(26)-C(31)  | -2.1(4)   |
| C(30)-C(25)-C(26)-C(31) | 177.1(2)  |
| C(25)-C(26)-C(27)-C(28) | 2.1(4)    |
| C(31)-C(26)-C(27)-C(28) | -178.4(2) |
| C(26)-C(27)-C(28)-C(29) | 0.8(4)    |
| C(27)-C(28)-C(29)-C(30) | -2.4(4)   |
| C(28)-C(29)-C(30)-C(25) | 1.0(4)    |
| O(9)-C(25)-C(30)-C(29)  | -178.9(3) |
| C(26)-C(25)-C(30)-C(29) | 2.0(4)    |
| C(27)-C(26)-C(31)-C(32) | -142.9(3) |
| C(25)-C(26)-C(31)-C(32) | 36.6(4)   |
| C(27)-C(26)-C(31)-C(36) | 34.4(3)   |
| C(25)-C(26)-C(31)-C(36) | -146.1(3) |
| C(36)-C(31)-C(32)-C(33) | 0.2(4)    |
| C(26)-C(31)-C(32)-C(33) | 177.5(2)  |
| C(31)-C(32)-C(33)-C(34) | 0.6(4)    |
| C(32)-C(33)-C(34)-C(35) | -1.1(4)   |
| C(32)-C(33)-C(34)-N(3)  | 179.5(3)  |
| C(33)-C(34)-C(35)-C(36) | 0.9(4)    |
| N(3)-C(34)-C(35)-C(36)  | -179.8(3) |
| C(34)-C(35)-C(36)-C(31) | -0.1(4)   |
| C(32)-C(31)-C(36)-C(35) | -0.5(4)   |
| C(26)-C(31)-C(36)-C(35) | -177.9(3) |

---

---

|                       |           |
|-----------------------|-----------|
| C(9)-C(10)-N(1)-O(2)  | -163.8(2) |
| C(11)-C(10)-N(1)-O(2) | 16.5(3)   |
| C(9)-C(10)-N(1)-O(3)  | 15.8(3)   |
| C(11)-C(10)-N(1)-O(3) | -163.9(2) |
| C(23)-C(22)-N(2)-O(6) | -14.0(3)  |
| C(21)-C(22)-N(2)-O(6) | 163.5(2)  |
| C(23)-C(22)-N(2)-O(5) | 165.8(2)  |
| C(21)-C(22)-N(2)-O(5) | -16.6(4)  |
| C(35)-C(34)-N(3)-O(7) | 179.2(3)  |
| C(33)-C(34)-N(3)-O(7) | -1.4(4)   |
| C(35)-C(34)-N(3)-O(8) | 0.2(4)    |
| C(33)-C(34)-N(3)-O(8) | 179.5(3)  |

---

Symmetry transformations used to generate equivalent atoms:

Table 7. Hydrogen bonds for s3776na [A and deg.].

---

| D-H...A             | d(D-H) | d(H...A) | d(D...A) | <(DHA) |
|---------------------|--------|----------|----------|--------|
| O(1)-H(1)...O(2)#1  | 0.84   | 1.98     | 2.780(3) | 157.9  |
| O(4)-H(4A)...O(5)#2 | 0.84   | 2.02     | 2.822(3) | 158.5  |
| O(9)-H(9A)...O(8)#3 | 0.84   | 2.23     | 2.958(3) | 144.8  |

---

Symmetry transformations used to generate equivalent atoms:

#1  $x, -y, z-1/2$     #2  $x, -y+1, z+1/2$     #3  $x, -y+1, z-1/2$

---

---

## Crystal data and structure refinement for s3726ma.

|                                   |                                                                                                                         |
|-----------------------------------|-------------------------------------------------------------------------------------------------------------------------|
| Identification code               | s3726ma                                                                                                                 |
| Empirical formula                 | C15 H17 N O5 S Si                                                                                                       |
| Formula weight                    | 351.45                                                                                                                  |
| Temperature                       | 150(2) K                                                                                                                |
| Wavelength                        | 1.54178 Å                                                                                                               |
| Crystal system, space group       | Monoclinic, P2(1)/c                                                                                                     |
| Unit cell dimensions              | a = 9.8463(2) Å    alpha = 90 deg.<br>b = 9.1987(2) Å    beta = 92.4730(10) deg.<br>c = 18.7908(5) Å    gamma = 90 deg. |
| Volume                            | 1700.36(7) Å <sup>3</sup>                                                                                               |
| Z, Calculated density             | 4, 1.373 Mg/m <sup>3</sup>                                                                                              |
| Absorption coefficient            | 2.586 mm <sup>-1</sup>                                                                                                  |
| F(000)                            | 736                                                                                                                     |
| Crystal size                      | 0.22 x 0.18 x 0.15 mm                                                                                                   |
| Theta range for data collection   | 4.49 to 72.28 deg.                                                                                                      |
| Limiting indices                  | -12<=h<=12, -9<=k<=11, -22<=l<=23                                                                                       |
| Reflections collected / unique    | 8472 / 3227 [R(int) = 0.0333]                                                                                           |
| Completeness to theta = 72.28     | 96.0 %                                                                                                                  |
| Absorption correction             | Semi-empirical from equivalents                                                                                         |
| Max. and min. transmission        | 0.6977 and 0.476706                                                                                                     |
| Refinement method                 | Full-matrix least-squares on F <sup>2</sup>                                                                             |
| Data / restraints / parameters    | 3227 / 0 / 212                                                                                                          |
| Goodness-of-fit on F <sup>2</sup> | 1.039                                                                                                                   |
| Final R indices [I>2sigma(I)]     | R1 = 0.0358, wR2 = 0.0977                                                                                               |
| R indices (all data)              | R1 = 0.0402, wR2 = 0.1011                                                                                               |
| Extinction coefficient            | 0.0005(2)                                                                                                               |
| Largest diff. peak and hole       | 0.413 and -0.343 e.Å <sup>-3</sup>                                                                                      |

Table 2. Atomic coordinates ( x 10<sup>4</sup>) and equivalent isotropic displacement parameters (Å<sup>2</sup> x 10<sup>3</sup>) for s3726ma.  
U(eq) is defined as one third of the trace of the orthogonalized Uij tensor.

---

|       | x       | y        | z        | U(eq) |
|-------|---------|----------|----------|-------|
| C(1)  | 2698(2) | 1794(2)  | 878(1)   | 24(1) |
| C(2)  | 2822(2) | 2830(2)  | 1415(1)  | 24(1) |
| C(3)  | 3210(2) | 4218(2)  | 1193(1)  | 32(1) |
| C(4)  | 3465(2) | 4513(2)  | 487(1)   | 40(1) |
| C(5)  | 3322(2) | 3440(2)  | -20(1)   | 39(1) |
| C(6)  | 2918(2) | 2052(2)  | 171(1)   | 31(1) |
| C(7)  | 2590(2) | 4160(2)  | 2882(1)  | 41(1) |
| C(8)  | 788(2)  | 1573(3)  | 2456(1)  | 45(1) |
| C(9)  | 3856(2) | 1167(2)  | 2737(1)  | 42(1) |
| C(10) | 2488(2) | -1715(2) | 141(1)   | 25(1) |
| C(11) | 1241(2) | -2410(2) | 23(1)    | 28(1) |
| C(12) | 916(2)  | -3121(2) | -606(1)  | 38(1) |
| C(13) | 1851(2) | -3127(2) | -1137(1) | 41(1) |
| C(14) | 3084(2) | -2426(2) | -1037(1) | 39(1) |
| C(15) | 3407(2) | -1731(2) | -398(1)  | 32(1) |
| N(1)  | 204(2)  | -2410(2) | 562(1)   | 38(1) |
| O(1)  | 2214(1) | 408(1)   | 1092(1)  | 28(1) |
| O(2)  | 4453(1) | -687(1)  | 950(1)   | 38(1) |
| O(3)  | 2588(2) | -2004(1) | 1512(1)  | 39(1) |
| O(4)  | -156(1) | -1235(2) | 790(1)   | 52(1) |
| O(5)  | -266(2) | -3584(2) | 727(1)   | 54(1) |
| S(1)  | 3046(1) | -1033(1) | 984(1)   | 27(1) |
| Si(1) | 2495(1) | 2419(1)  | 2381(1)  | 27(1) |

Table 3. Bond lengths [Å] and angles [deg] for s3726ma.

|             |            |
|-------------|------------|
| C(1)-C(6)   | 1.377(2)   |
| C(1)-C(2)   | 1.389(2)   |
| C(1)-O(1)   | 1.4253(18) |
| C(2)-C(3)   | 1.402(2)   |
| C(2)-Si(1)  | 1.8952(16) |
| C(3)-C(4)   | 1.388(3)   |
| C(3)-H(3)   | 0.9500     |
| C(4)-C(5)   | 1.374(3)   |
| C(4)-H(4)   | 0.9500     |
| C(5)-C(6)   | 1.389(3)   |
| C(5)-H(5)   | 0.9500     |
| C(6)-H(6)   | 0.9500     |
| C(7)-Si(1)  | 1.858(2)   |
| C(7)-H(7A)  | 0.9800     |
| C(7)-H(7B)  | 0.9800     |
| C(7)-H(7C)  | 0.9800     |
| C(8)-Si(1)  | 1.8623(19) |
| C(8)-H(8A)  | 0.9800     |
| C(8)-H(8B)  | 0.9800     |
| C(8)-H(8C)  | 0.9800     |
| C(9)-Si(1)  | 1.869(2)   |
| C(9)-H(9A)  | 0.9800     |
| C(9)-H(9B)  | 0.9800     |
| C(9)-H(9C)  | 0.9800     |
| C(10)-C(15) | 1.386(2)   |
| C(10)-C(11) | 1.394(2)   |
| C(10)-S(1)  | 1.7697(16) |
| C(11)-C(12) | 1.376(2)   |
| C(11)-N(1)  | 1.469(2)   |
| C(12)-C(13) | 1.387(3)   |
| C(12)-H(12) | 0.9500     |

---

|                   |            |
|-------------------|------------|
| C(13)-C(14)       | 1.381(3)   |
| C(13)-H(13)       | 0.9500     |
| C(14)-C(15)       | 1.385(3)   |
| C(14)-H(14)       | 0.9500     |
| C(15)-H(15)       | 0.9500     |
| N(1)-O(4)         | 1.220(2)   |
| N(1)-O(5)         | 1.221(2)   |
| O(1)-S(1)         | 1.5765(12) |
| O(2)-S(1)         | 1.4253(13) |
| O(3)-S(1)         | 1.4236(13) |
|                   |            |
| C(6)-C(1)-C(2)    | 124.80(15) |
| C(6)-C(1)-O(1)    | 119.71(14) |
| C(2)-C(1)-O(1)    | 115.33(13) |
| C(1)-C(2)-C(3)    | 115.10(15) |
| C(1)-C(2)-Si(1)   | 123.08(12) |
| C(3)-C(2)-Si(1)   | 121.82(13) |
| C(4)-C(3)-C(2)    | 121.74(17) |
| C(4)-C(3)-H(3)    | 119.1      |
| C(2)-C(3)-H(3)    | 119.1      |
| C(5)-C(4)-C(3)    | 120.34(17) |
| C(5)-C(4)-H(4)    | 119.8      |
| C(3)-C(4)-H(4)    | 119.8      |
| C(4)-C(5)-C(6)    | 120.17(16) |
| C(4)-C(5)-H(5)    | 119.9      |
| C(6)-C(5)-H(5)    | 119.9      |
| C(1)-C(6)-C(5)    | 117.83(17) |
| C(1)-C(6)-H(6)    | 121.1      |
| C(5)-C(6)-H(6)    | 121.1      |
| Si(1)-C(7)-H(7A)  | 109.5      |
| Si(1)-C(7)-H(7B)  | 109.5      |
| H(7A)-C(7)-H(7B)  | 109.5      |
| Si(1)-C(7)-H(7C)  | 109.5      |
| H(7A)-C(7)-H(7C)  | 109.5      |
| H(7B)-C(7)-H(7C)  | 109.5      |
| Si(1)-C(8)-H(8A)  | 109.5      |
| Si(1)-C(8)-H(8B)  | 109.5      |
| H(8A)-C(8)-H(8B)  | 109.5      |
| Si(1)-C(8)-H(8C)  | 109.5      |
| H(8A)-C(8)-H(8C)  | 109.5      |
| H(8B)-C(8)-H(8C)  | 109.5      |
| Si(1)-C(9)-H(9A)  | 109.5      |
| Si(1)-C(9)-H(9B)  | 109.5      |
| H(9A)-C(9)-H(9B)  | 109.5      |
| Si(1)-C(9)-H(9C)  | 109.5      |
| H(9A)-C(9)-H(9C)  | 109.5      |
| H(9B)-C(9)-H(9C)  | 109.5      |
| C(15)-C(10)-C(11) | 118.56(15) |
| C(15)-C(10)-S(1)  | 118.04(13) |
| C(11)-C(10)-S(1)  | 122.81(12) |
| C(12)-C(11)-C(10) | 121.61(16) |
| C(12)-C(11)-N(1)  | 116.76(16) |
| C(10)-C(11)-N(1)  | 121.63(15) |
| C(11)-C(12)-C(13) | 118.93(18) |
| C(11)-C(12)-H(12) | 120.5      |
| C(13)-C(12)-H(12) | 120.5      |
| C(14)-C(13)-C(12) | 120.47(17) |
| C(14)-C(13)-H(13) | 119.8      |
| C(12)-C(13)-H(13) | 119.8      |
| C(13)-C(14)-C(15) | 120.08(17) |
| C(13)-C(14)-H(14) | 120.0      |
| C(15)-C(14)-H(14) | 120.0      |

---

---

|                   |            |
|-------------------|------------|
| C(14)-C(15)-C(10) | 120.34(17) |
| C(14)-C(15)-H(15) | 119.8      |
| C(10)-C(15)-H(15) | 119.8      |
| O(4)-N(1)-O(5)    | 125.13(16) |
| O(4)-N(1)-C(11)   | 117.62(15) |
| O(5)-N(1)-C(11)   | 117.19(16) |
| C(1)-O(1)-S(1)    | 122.23(9)  |
| O(3)-S(1)-O(2)    | 120.62(9)  |
| O(3)-S(1)-O(1)    | 104.80(7)  |
| O(2)-S(1)-O(1)    | 109.27(7)  |
| O(3)-S(1)-C(10)   | 107.83(8)  |
| O(2)-S(1)-C(10)   | 107.67(8)  |
| O(1)-S(1)-C(10)   | 105.73(7)  |
| C(7)-Si(1)-C(8)   | 110.35(9)  |
| C(7)-Si(1)-C(9)   | 109.28(10) |
| C(8)-Si(1)-C(9)   | 110.56(11) |
| C(7)-Si(1)-C(2)   | 107.85(9)  |
| C(8)-Si(1)-C(2)   | 110.29(8)  |
| C(9)-Si(1)-C(2)   | 108.45(8)  |

---

Symmetry transformations used to generate equivalent atoms:

Table 4. Anisotropic displacement parameters ( $\text{\AA}^2 \times 10^3$ ) for s3726ma. The anisotropic displacement factor exponent takes the form:  $-2 \pi^2 [ h^2 a^{*2} U_{11} + \dots + 2 h k a^* b^* U_{12} ]$

---

|       | U11   | U22   | U33   | U23    | U13   | U12    |
|-------|-------|-------|-------|--------|-------|--------|
| C(1)  | 23(1) | 20(1) | 29(1) | 2(1)   | 3(1)  | -1(1)  |
| C(2)  | 22(1) | 20(1) | 28(1) | 0(1)   | 2(1)  | 1(1)   |
| C(3)  | 35(1) | 19(1) | 43(1) | -1(1)  | 7(1)  | 1(1)   |
| C(4)  | 48(1) | 22(1) | 52(1) | 13(1)  | 14(1) | 5(1)   |
| C(5)  | 48(1) | 34(1) | 34(1) | 14(1)  | 11(1) | 8(1)   |
| C(6)  | 38(1) | 29(1) | 27(1) | 1(1)   | 3(1)  | 3(1)   |
| C(7)  | 38(1) | 46(1) | 40(1) | -17(1) | 6(1)  | 1(1)   |
| C(8)  | 38(1) | 62(1) | 36(1) | -1(1)  | 10(1) | -15(1) |
| C(9)  | 49(1) | 50(1) | 28(1) | 1(1)   | -2(1) | 12(1)  |
| C(10) | 29(1) | 17(1) | 28(1) | 0(1)   | 3(1)  | 2(1)   |
| C(11) | 29(1) | 23(1) | 31(1) | -2(1)  | 4(1)  | -1(1)  |
| C(12) | 41(1) | 32(1) | 41(1) | -9(1)  | -5(1) | 1(1)   |
| C(13) | 58(1) | 35(1) | 31(1) | -8(1)  | -2(1) | 13(1)  |
| C(14) | 56(1) | 30(1) | 32(1) | 4(1)   | 16(1) | 15(1)  |
| C(15) | 34(1) | 22(1) | 40(1) | 5(1)   | 11(1) | 3(1)   |
| N(1)  | 32(1) | 43(1) | 42(1) | -10(1) | 8(1)  | -13(1) |
| O(1)  | 33(1) | 21(1) | 32(1) | -3(1)  | 8(1)  | -6(1)  |
| O(2)  | 30(1) | 30(1) | 53(1) | 2(1)   | -6(1) | -4(1)  |
| O(3)  | 58(1) | 27(1) | 32(1) | 7(1)   | -1(1) | -10(1) |
| O(4)  | 39(1) | 54(1) | 65(1) | -28(1) | 23(1) | -11(1) |
| O(5)  | 54(1) | 52(1) | 56(1) | -2(1)  | 15(1) | -26(1) |
| S(1)  | 31(1) | 20(1) | 30(1) | 2(1)   | -1(1) | -4(1)  |
| Si(1) | 25(1) | 30(1) | 25(1) | -4(1)  | 3(1)  | -1(1)  |

---

Table 5. Hydrogen coordinates ( $\times 10^4$ ) and isotropic displacement parameters ( $\text{\AA}^2 \times 10^3$ ) for s3726ma.

---

|       | x    | y     | z     | U(eq) |
|-------|------|-------|-------|-------|
| H(3)  | 3300 | 4977  | 1534  | 39    |
| H(4)  | 3740 | 5460  | 353   | 48    |
| H(5)  | 3500 | 3649  | -503  | 46    |
| H(6)  | 2798 | 1305  | -175  | 38    |
| H(7A) | 1981 | 4873  | 2649  | 62    |
| H(7B) | 3525 | 4527  | 2892  | 62    |
| H(7C) | 2315 | 3997  | 3371  | 62    |
| H(8A) | 656  | 1307  | 2953  | 68    |
| H(8B) | 726  | 700   | 2157  | 68    |
| H(8C) | 84   | 2267  | 2296  | 68    |
| H(9A) | 4747 | 1622  | 2687  | 64    |
| H(9B) | 3817 | 252   | 2469  | 64    |
| H(9C) | 3719 | 969   | 3241  | 64    |
| H(12) | 66   | -3599 | -675  | 46    |
| H(13) | 1642 | -3618 | -1573 | 50    |
| H(14) | 3712 | -2419 | -1407 | 47    |
| H(15) | 4263 | -1263 | -328  | 38    |

Table 6. Torsion angles [deg] for s3726ma.

|                         |             |
|-------------------------|-------------|
| C(6)-C(1)-C(2)-C(3)     | -0.4(2)     |
| O(1)-C(1)-C(2)-C(3)     | -175.83(13) |
| C(6)-C(1)-C(2)-Si(1)    | 179.58(13)  |
| O(1)-C(1)-C(2)-Si(1)    | 4.10(19)    |
| C(1)-C(2)-C(3)-C(4)     | -0.9(2)     |
| Si(1)-C(2)-C(3)-C(4)    | 179.20(14)  |
| C(2)-C(3)-C(4)-C(5)     | 1.0(3)      |
| C(3)-C(4)-C(5)-C(6)     | 0.1(3)      |
| C(2)-C(1)-C(6)-C(5)     | 1.4(3)      |
| O(1)-C(1)-C(6)-C(5)     | 176.69(15)  |
| C(4)-C(5)-C(6)-C(1)     | -1.2(3)     |
| C(15)-C(10)-C(11)-C(12) | 0.9(3)      |
| S(1)-C(10)-C(11)-C(12)  | -170.13(14) |
| C(15)-C(10)-C(11)-N(1)  | -178.53(16) |
| S(1)-C(10)-C(11)-N(1)   | 10.4(2)     |
| C(10)-C(11)-C(12)-C(13) | -0.7(3)     |
| N(1)-C(11)-C(12)-C(13)  | 178.75(17)  |
| C(11)-C(12)-C(13)-C(14) | -0.3(3)     |
| C(12)-C(13)-C(14)-C(15) | 1.2(3)      |
| C(13)-C(14)-C(15)-C(10) | -1.0(3)     |
| C(11)-C(10)-C(15)-C(14) | 0.0(2)      |
| S(1)-C(10)-C(15)-C(14)  | 171.45(13)  |
| C(12)-C(11)-N(1)-O(4)   | -124.93(19) |
| C(10)-C(11)-N(1)-O(4)   | 54.6(3)     |
| C(12)-C(11)-N(1)-O(5)   | 52.4(3)     |
| C(10)-C(11)-N(1)-O(5)   | -128.12(19) |
| C(6)-C(1)-O(1)-S(1)     | 61.65(19)   |
| C(2)-C(1)-O(1)-S(1)     | -122.63(13) |
| C(1)-O(1)-S(1)-O(3)     | 155.19(12)  |
| C(1)-O(1)-S(1)-O(2)     | 24.61(14)   |
| C(1)-O(1)-S(1)-C(10)    | -91.02(13)  |
| C(15)-C(10)-S(1)-O(3)   | -135.10(14) |
| C(11)-C(10)-S(1)-O(3)   | 36.01(16)   |
| C(15)-C(10)-S(1)-O(2)   | -3.49(15)   |
| C(11)-C(10)-S(1)-O(2)   | 167.62(13)  |
| C(15)-C(10)-S(1)-O(1)   | 113.23(13)  |



---

|                       |             |
|-----------------------|-------------|
| C(11)-C(10)-S(1)-O(1) | -75.66(15)  |
| C(1)-C(2)-Si(1)-C(7)  | -173.63(14) |
| C(3)-C(2)-Si(1)-C(7)  | 6.30(16)    |
| C(1)-C(2)-Si(1)-C(8)  | -53.06(16)  |
| C(3)-C(2)-Si(1)-C(8)  | 126.87(15)  |
| C(1)-C(2)-Si(1)-C(9)  | 68.14(16)   |
| C(3)-C(2)-Si(1)-C(9)  | -111.93(15) |

---

Symmetry transformations used to generate equivalent atoms:

Table 7. Hydrogen bonds for s3726ma [A and deg.].

---

| D-H...A | d(D-H) | d(H...A) | d(D...A) | <(DHA) |
|---------|--------|----------|----------|--------|
|---------|--------|----------|----------|--------|

---

---

## Crystal data and structure refinement for s3898ma.

|                                   |                                                                                                                           |
|-----------------------------------|---------------------------------------------------------------------------------------------------------------------------|
| Identification code               | s3898ma                                                                                                                   |
| Empirical formula                 | C13 H10 N2 O5                                                                                                             |
| Formula weight                    | 274.23                                                                                                                    |
| Temperature                       | 100(2) K                                                                                                                  |
| Wavelength                        | 1.54178 Å                                                                                                                 |
| Crystal system, space group       | Monoclinic, P2(1)/n                                                                                                       |
| Unit cell dimensions              | a = 15.6137(4) Å    alpha = 90 deg.<br>b = 7.7484(2) Å    beta = 110.1920(10) deg.<br>c = 21.2252(5) Å    gamma = 90 deg. |
| Volume                            | 2410.03(10) Å <sup>3</sup>                                                                                                |
| Z, Calculated density             | 8, 1.512 Mg/m <sup>3</sup>                                                                                                |
| Absorption coefficient            | 1.010 mm <sup>-1</sup>                                                                                                    |
| F(000)                            | 1136                                                                                                                      |
| Crystal size                      | 0.23 x 0.19 x 0.15 mm                                                                                                     |
| Theta range for data collection   | 6.04 to 72.30 deg.                                                                                                        |
| Limiting indices                  | -19<=h<=18, -9<=k<=9, -18<=l<=26                                                                                          |
| Reflections collected / unique    | 12895 / 4561 [R(int) = 0.0231]                                                                                            |
| Completeness to theta = 66.60     | 96.5 %                                                                                                                    |
| Absorption correction             | Semi-empirical from equivalents                                                                                           |
| Max. and min. transmission        | 0.8633 and 0.658587                                                                                                       |
| Refinement method                 | Full-matrix least-squares on F <sup>2</sup>                                                                               |
| Data / restraints / parameters    | 4561 / 0 / 365                                                                                                            |
| Goodness-of-fit on F <sup>2</sup> | 1.081                                                                                                                     |
| Final R indices [I>2sigma(I)]     | R1 = 0.0448, wR2 = 0.1116                                                                                                 |
| R indices (all data)              | R1 = 0.0475, wR2 = 0.1131                                                                                                 |
| Largest diff. peak and hole       | 0.294 and -0.336 e.Å <sup>-3</sup>                                                                                        |

Table 2. Atomic coordinates ( x 10<sup>4</sup>) and equivalent isotropic displacement parameters (Å<sup>2</sup> x 10<sup>3</sup>) for s3898ma. U(eq) is defined as one third of the trace of the orthogonalized Uij tensor.

---

x

y

z

U(eq)

---

---

|       |          |          |         |       |
|-------|----------|----------|---------|-------|
| C(12) | 5981(1)  | 10577(2) | 971(1)  | 19(1) |
| C(1)  | 8758(1)  | 10754(2) | 2871(1) | 15(1) |
| C(2)  | 9168(1)  | 10929(2) | 3570(1) | 16(1) |
| C(3)  | 8745(1)  | 10361(2) | 4016(1) | 16(1) |
| C(4)  | 7889(1)  | 9622(2)  | 3773(1) | 17(1) |
| C(5)  | 7474(1)  | 9462(2)  | 3076(1) | 15(1) |
| C(6)  | 7888(1)  | 9985(2)  | 2626(1) | 15(1) |
| C(7)  | 7405(1)  | 9003(3)  | 4236(1) | 22(1) |
| C(8)  | 7379(1)  | 9843(2)  | 1891(1) | 14(1) |
| C(9)  | 7686(1)  | 9094(2)  | 1405(1) | 14(1) |
| C(10) | 7165(1)  | 9060(2)  | 727(1)  | 16(1) |
| C(11) | 6308(1)  | 9817(2)  | 507(1)  | 19(1) |
| C(13) | 6504(1)  | 10573(2) | 1648(1) | 17(1) |
| C(14) | 1556(1)  | 9176(2)  | 2795(1) | 14(1) |
| C(15) | 1814(1)  | 8991(2)  | 3494(1) | 16(1) |
| C(16) | 2664(1)  | 9545(2)  | 3930(1) | 17(1) |
| C(17) | 3287(1)  | 10260(2) | 3680(1) | 18(1) |
| C(18) | 3038(1)  | 10432(2) | 2982(1) | 16(1) |
| C(19) | 2190(1)  | 9934(2)  | 2541(1) | 15(1) |
| C(20) | 4215(1)  | 10866(3) | 4134(1) | 23(1) |
| C(21) | 1981(1)  | 10083(2) | 1803(1) | 15(1) |
| C(22) | 1189(1)  | 10817(2) | 1343(1) | 16(1) |
| C(23) | 1010(1)  | 10801(2) | 655(1)  | 19(1) |
| C(24) | 1635(1)  | 10061(3) | 405(1)  | 21(1) |
| C(25) | 2438(1)  | 9369(2)  | 847(1)  | 21(1) |
| C(26) | 2602(1)  | 9376(2)  | 1532(1) | 18(1) |
| N(1)  | 10060(1) | 11728(2) | 3856(1) | 18(1) |
| N(2)  | 8576(1)  | 8217(2)  | 1589(1) | 15(1) |
| N(3)  | 1193(1)  | 8229(2)  | 3786(1) | 19(1) |
| N(4)  | 508(1)   | 11705(2) | 1565(1) | 17(1) |
| O(1)  | 9117(1)  | 11293(2) | 2414(1) | 17(1) |
| O(2)  | 10462(1) | 12205(2) | 3472(1) | 27(1) |
| O(3)  | 10399(1) | 11906(2) | 4466(1) | 27(1) |
| O(4)  | 8922(1)  | 7652(2)  | 2161(1) | 17(1) |
| O(5)  | 8921(1)  | 8054(2)  | 1154(1) | 25(1) |
| O(6)  | 757(1)   | 8668(2)  | 2344(1) | 16(1) |
| O(7)  | 1414(1)  | 8148(2)  | 4399(1) | 28(1) |
| O(8)  | 444(1)   | 7680(2)  | 3408(1) | 28(1) |
| O(9)  | 759(1)   | 12338(2) | 2131(1) | 19(1) |
| O(10) | -275(1)  | 11812(2) | 1166(1) | 28(1) |

---

Table 3. Bond lengths [Å] and angles [deg] for s3898ma.

---

|             |          |
|-------------|----------|
| C(12)-C(13) | 1.387(3) |
| C(12)-C(11) | 1.388(3) |
| C(12)-H(12) | 0.9498   |
| C(1)-O(1)   | 1.343(2) |
| C(1)-C(2)   | 1.406(3) |
| C(1)-C(6)   | 1.409(2) |
| C(2)-C(3)   | 1.397(3) |
| C(2)-N(1)   | 1.453(2) |
| C(3)-C(4)   | 1.381(3) |
| C(3)-H(3)   | 0.9500   |
| C(4)-C(5)   | 1.401(3) |
| C(4)-C(7)   | 1.509(2) |
| C(5)-C(6)   | 1.387(2) |
| C(5)-H(5)   | 0.9500   |
| C(6)-C(8)   | 1.489(3) |
| C(7)-H(7A)  | 0.9800   |

---

---

|                   |            |
|-------------------|------------|
| C(7)-H(7B)        | 0.9800     |
| C(7)-H(7C)        | 0.9800     |
| C(8)-C(13)        | 1.402(2)   |
| C(8)-C(9)         | 1.405(2)   |
| C(9)-C(10)        | 1.386(3)   |
| C(9)-N(2)         | 1.474(2)   |
| C(10)-C(11)       | 1.386(3)   |
| C(10)-H(10)       | 0.9500     |
| C(11)-H(11)       | 0.9500     |
| C(13)-H(13)       | 0.9500     |
| C(14)-O(6)        | 1.343(2)   |
| C(14)-C(15)       | 1.403(2)   |
| C(14)-C(19)       | 1.409(2)   |
| C(15)-C(16)       | 1.398(3)   |
| C(15)-N(3)        | 1.445(2)   |
| C(16)-C(17)       | 1.376(3)   |
| C(16)-H(16)       | 0.9500     |
| C(17)-C(18)       | 1.402(3)   |
| C(17)-C(20)       | 1.511(3)   |
| C(18)-C(19)       | 1.386(2)   |
| C(18)-H(18)       | 0.9500     |
| C(19)-C(21)       | 1.490(2)   |
| C(20)-H(20A)      | 0.9800     |
| C(20)-H(20B)      | 0.9800     |
| C(20)-H(20C)      | 0.9800     |
| C(21)-C(26)       | 1.399(2)   |
| C(21)-C(22)       | 1.405(2)   |
| C(22)-C(23)       | 1.388(3)   |
| C(22)-N(4)        | 1.473(2)   |
| C(23)-C(24)       | 1.385(3)   |
| C(23)-H(23)       | 0.9500     |
| C(24)-C(25)       | 1.389(3)   |
| C(24)-H(24)       | 0.9500     |
| C(25)-C(26)       | 1.386(3)   |
| C(25)-H(25)       | 0.9500     |
| C(26)-H(26)       | 0.9500     |
| N(1)-O(3)         | 1.226(2)   |
| N(1)-O(2)         | 1.244(2)   |
| N(2)-O(5)         | 1.225(2)   |
| N(2)-O(4)         | 1.2276(19) |
| N(3)-O(7)         | 1.226(2)   |
| N(3)-O(8)         | 1.243(2)   |
| N(4)-O(10)        | 1.226(2)   |
| N(4)-O(9)         | 1.230(2)   |
| O(1)-H(1)         | 0.8400     |
| O(6)-H(6)         | 0.8400     |
| C(13)-C(12)-C(11) | 120.36(17) |
| C(13)-C(12)-H(12) | 119.8      |
| C(11)-C(12)-H(12) | 119.8      |
| O(1)-C(1)-C(2)    | 125.54(16) |
| O(1)-C(1)-C(6)    | 117.02(16) |
| C(2)-C(1)-C(6)    | 117.41(16) |
| C(3)-C(2)-C(1)    | 122.37(16) |
| C(3)-C(2)-N(1)    | 117.46(16) |
| C(1)-C(2)-N(1)    | 120.17(16) |
| C(4)-C(3)-C(2)    | 120.06(17) |
| C(4)-C(3)-H(3)    | 120.0      |
| C(2)-C(3)-H(3)    | 120.0      |
| C(3)-C(4)-C(5)    | 117.77(16) |
| C(3)-C(4)-C(7)    | 121.84(17) |
| C(5)-C(4)-C(7)    | 120.38(17) |

---

---

|                     |            |
|---------------------|------------|
| C(6)-C(5)-C(4)      | 123.13(16) |
| C(6)-C(5)-H(5)      | 118.4      |
| C(4)-C(5)-H(5)      | 118.4      |
| C(5)-C(6)-C(1)      | 119.24(17) |
| C(5)-C(6)-C(8)      | 119.54(16) |
| C(1)-C(6)-C(8)      | 121.07(16) |
| C(4)-C(7)-H(7A)     | 109.5      |
| C(4)-C(7)-H(7B)     | 109.5      |
| H(7A)-C(7)-H(7B)    | 109.5      |
| C(4)-C(7)-H(7C)     | 109.5      |
| H(7A)-C(7)-H(7C)    | 109.5      |
| H(7B)-C(7)-H(7C)    | 109.5      |
| C(13)-C(8)-C(9)     | 115.66(16) |
| C(13)-C(8)-C(6)     | 117.07(15) |
| C(9)-C(8)-C(6)      | 127.25(16) |
| C(10)-C(9)-C(8)     | 122.92(16) |
| C(10)-C(9)-N(2)     | 115.30(15) |
| C(8)-C(9)-N(2)      | 121.74(15) |
| C(11)-C(10)-C(9)    | 119.62(17) |
| C(11)-C(10)-H(10)   | 120.2      |
| C(9)-C(10)-H(10)    | 120.2      |
| C(10)-C(11)-C(12)   | 119.27(17) |
| C(10)-C(11)-H(11)   | 120.4      |
| C(12)-C(11)-H(11)   | 120.4      |
| C(12)-C(13)-C(8)    | 122.16(17) |
| C(12)-C(13)-H(13)   | 118.9      |
| C(8)-C(13)-H(13)    | 118.9      |
| O(6)-C(14)-C(15)    | 125.50(16) |
| O(6)-C(14)-C(19)    | 116.87(15) |
| C(15)-C(14)-C(19)   | 117.62(16) |
| C(16)-C(15)-C(14)   | 121.97(16) |
| C(16)-C(15)-N(3)    | 117.71(16) |
| C(14)-C(15)-N(3)    | 120.32(16) |
| C(17)-C(16)-C(15)   | 120.28(17) |
| C(17)-C(16)-H(16)   | 119.9      |
| C(15)-C(16)-H(16)   | 119.9      |
| C(16)-C(17)-C(18)   | 118.05(17) |
| C(16)-C(17)-C(20)   | 121.95(17) |
| C(18)-C(17)-C(20)   | 120.00(17) |
| C(19)-C(18)-C(17)   | 122.66(16) |
| C(19)-C(18)-H(18)   | 118.7      |
| C(17)-C(18)-H(18)   | 118.7      |
| C(18)-C(19)-C(14)   | 119.39(16) |
| C(18)-C(19)-C(21)   | 120.02(15) |
| C(14)-C(19)-C(21)   | 120.44(15) |
| C(17)-C(20)-H(20A)  | 109.5      |
| C(17)-C(20)-H(20B)  | 109.5      |
| H(20A)-C(20)-H(20B) | 109.5      |
| C(17)-C(20)-H(20C)  | 109.5      |
| H(20A)-C(20)-H(20C) | 109.5      |
| H(20B)-C(20)-H(20C) | 109.5      |
| C(26)-C(21)-C(22)   | 116.17(16) |
| C(26)-C(21)-C(19)   | 118.06(16) |
| C(22)-C(21)-C(19)   | 125.72(16) |
| C(23)-C(22)-C(21)   | 122.54(17) |
| C(23)-C(22)-N(4)    | 115.73(15) |
| C(21)-C(22)-N(4)    | 121.70(16) |
| C(24)-C(23)-C(22)   | 119.53(17) |
| C(24)-C(23)-H(23)   | 120.2      |
| C(22)-C(23)-H(23)   | 120.2      |
| C(23)-C(24)-C(25)   | 119.54(17) |
| C(23)-C(24)-H(24)   | 120.2      |

---

---

|                   |            |
|-------------------|------------|
| C(25)-C(24)-H(24) | 120.2      |
| C(26)-C(25)-C(24) | 120.20(17) |
| C(26)-C(25)-H(25) | 119.9      |
| C(24)-C(25)-H(25) | 119.9      |
| C(25)-C(26)-C(21) | 121.98(17) |
| C(25)-C(26)-H(26) | 119.0      |
| C(21)-C(26)-H(26) | 119.0      |
| O(3)-N(1)-O(2)    | 121.82(15) |
| O(3)-N(1)-C(2)    | 119.33(15) |
| O(2)-N(1)-C(2)    | 118.85(15) |
| O(5)-N(2)-O(4)    | 123.44(15) |
| O(5)-N(2)-C(9)    | 117.91(15) |
| O(4)-N(2)-C(9)    | 118.63(14) |
| O(7)-N(3)-O(8)    | 121.69(16) |
| O(7)-N(3)-C(15)   | 119.40(16) |
| O(8)-N(3)-C(15)   | 118.91(15) |
| O(10)-N(4)-O(9)   | 123.52(16) |
| O(10)-N(4)-C(22)  | 117.99(15) |
| O(9)-N(4)-C(22)   | 118.47(14) |
| C(1)-O(1)-H(1)    | 109.5      |
| C(14)-O(6)-H(6)   | 109.5      |

---

Symmetry transformations used to generate equivalent atoms:

Table 4. Anisotropic displacement parameters ( $\text{\AA}^2 \times 10^3$ ) for s3898ma. The anisotropic displacement factor exponent takes the form:  
 $-2 \pi^2 [ h^2 a^{*2} U_{11} + \dots + 2 h k a^* b^* U_{12} ]$

---

|       | U11   | U22   | U33   | U23   | U13   | U12   |
|-------|-------|-------|-------|-------|-------|-------|
| C(12) | 12(1) | 18(1) | 24(1) | -2(1) | 1(1)  | 1(1)  |
| C(1)  | 14(1) | 12(1) | 18(1) | 0(1)  | 5(1)  | 2(1)  |
| C(2)  | 13(1) | 13(1) | 18(1) | -2(1) | 1(1)  | 1(1)  |
| C(3)  | 18(1) | 13(1) | 16(1) | -1(1) | 2(1)  | 4(1)  |
| C(4)  | 19(1) | 12(1) | 20(1) | 0(1)  | 7(1)  | 3(1)  |
| C(5)  | 14(1) | 12(1) | 20(1) | -2(1) | 4(1)  | 0(1)  |
| C(6)  | 14(1) | 11(1) | 17(1) | -2(1) | 4(1)  | 2(1)  |
| C(7)  | 24(1) | 21(1) | 21(1) | 0(1)  | 10(1) | -1(1) |
| C(8)  | 13(1) | 12(1) | 16(1) | 0(1)  | 3(1)  | -3(1) |
| C(9)  | 11(1) | 12(1) | 16(1) | 1(1)  | 3(1)  | -1(1) |
| C(10) | 18(1) | 15(1) | 17(1) | -1(1) | 6(1)  | -2(1) |
| C(11) | 18(1) | 18(1) | 15(1) | 0(1)  | 0(1)  | -2(1) |
| C(13) | 16(1) | 16(1) | 19(1) | -4(1) | 5(1)  | 0(1)  |
| C(14) | 13(1) | 12(1) | 18(1) | 0(1)  | 4(1)  | 2(1)  |
| C(15) | 18(1) | 14(1) | 19(1) | 2(1)  | 8(1)  | 4(1)  |
| C(16) | 19(1) | 16(1) | 17(1) | 1(1)  | 5(1)  | 5(1)  |
| C(17) | 16(1) | 14(1) | 20(1) | 0(1)  | 2(1)  | 3(1)  |
| C(18) | 14(1) | 12(1) | 22(1) | 1(1)  | 6(1)  | 2(1)  |
| C(19) | 14(1) | 12(1) | 18(1) | 1(1)  | 5(1)  | 2(1)  |
| C(20) | 19(1) | 22(1) | 22(1) | -1(1) | 0(1)  | 0(1)  |
| C(21) | 14(1) | 13(1) | 17(1) | 2(1)  | 5(1)  | -4(1) |
| C(22) | 14(1) | 14(1) | 20(1) | 2(1)  | 6(1)  | -2(1) |
| C(23) | 19(1) | 18(1) | 18(1) | 4(1)  | 2(1)  | -3(1) |
| C(24) | 25(1) | 23(1) | 16(1) | 1(1)  | 8(1)  | -7(1) |
| C(25) | 22(1) | 20(1) | 23(1) | -1(1) | 12(1) | -2(1) |
| C(26) | 16(1) | 16(1) | 21(1) | 2(1)  | 7(1)  | -1(1) |
| N(1)  | 15(1) | 16(1) | 20(1) | -3(1) | 2(1)  | 1(1)  |

---

|       |       |       |       |       |       |       |
|-------|-------|-------|-------|-------|-------|-------|
| N(2)  | 14(1) | 14(1) | 18(1) | 0(1)  | 5(1)  | -1(1) |
| N(3)  | 19(1) | 18(1) | 20(1) | 5(1)  | 9(1)  | 4(1)  |
| N(4)  | 15(1) | 15(1) | 20(1) | 4(1)  | 5(1)  | 0(1)  |
| O(1)  | 13(1) | 19(1) | 19(1) | 0(1)  | 5(1)  | -4(1) |
| O(2)  | 18(1) | 35(1) | 28(1) | -7(1) | 7(1)  | -9(1) |
| O(3)  | 22(1) | 32(1) | 19(1) | -6(1) | -3(1) | -4(1) |
| O(4)  | 16(1) | 18(1) | 16(1) | 4(1)  | 4(1)  | 1(1)  |
| O(5)  | 20(1) | 39(1) | 20(1) | 2(1)  | 11(1) | 7(1)  |
| O(6)  | 13(1) | 18(1) | 18(1) | 2(1)  | 5(1)  | -3(1) |
| O(7)  | 33(1) | 37(1) | 18(1) | 6(1)  | 12(1) | 1(1)  |
| O(8)  | 18(1) | 42(1) | 25(1) | 8(1)  | 7(1)  | -6(1) |
| O(9)  | 19(1) | 16(1) | 20(1) | -2(1) | 6(1)  | -1(1) |
| O(10) | 14(1) | 40(1) | 25(1) | 2(1)  | 0(1)  | 5(1)  |

Table 5. Hydrogen coordinates (  $\times 10^4$ ) and isotropic displacement parameters ( $\text{\AA}^2 \times 10^3$ ) for s3898ma.

|        | x    | y     | z    | U(eq) |
|--------|------|-------|------|-------|
| H(3)   | 9048 | 10484 | 4486 | 20    |
| H(5)   | 6880 | 8971  | 2904 | 18    |
| H(7A)  | 7845 | 8900  | 4693 | 32    |
| H(7B)  | 7127 | 7874  | 4083 | 32    |
| H(7C)  | 6928 | 9832  | 4231 | 32    |
| H(10)  | 7395 | 8521  | 416  | 20    |
| H(11)  | 5949 | 9815  | 43   | 22    |
| H(12)  | 5395 | 11103 | 824  | 22    |
| H(13)  | 6261 | 11082 | 1958 | 21    |
| H(16)  | 2812 | 9426  | 4402 | 21    |
| H(18)  | 3467 | 10909 | 2804 | 19    |
| H(20A) | 4231 | 10882 | 4600 | 34    |
| H(20B) | 4329 | 12031 | 4002 | 34    |
| H(20C) | 4685 | 10078 | 4095 | 34    |
| H(23)  | 462  | 11295 | 358  | 23    |
| H(24)  | 1514 | 10028 | -65  | 26    |
| H(25)  | 2877 | 8888  | 680  | 25    |
| H(26)  | 3153 | 8887  | 1826 | 21    |
| H(1)   | 9643 | 11686 | 2611 | 25    |
| H(6)   | 420  | 8279  | 2546 | 25    |

Table 6. Torsion angles [deg] for s3898ma.

|                     |             |
|---------------------|-------------|
| O(1)-C(1)-C(2)-C(3) | 178.92(16)  |
| C(6)-C(1)-C(2)-C(3) | 0.5(3)      |
| O(1)-C(1)-C(2)-N(1) | -0.9(3)     |
| C(6)-C(1)-C(2)-N(1) | -179.32(15) |
| C(1)-C(2)-C(3)-C(4) | -1.1(3)     |
| N(1)-C(2)-C(3)-C(4) | 178.73(15)  |
| C(2)-C(3)-C(4)-C(5) | 0.3(3)      |
| C(2)-C(3)-C(4)-C(7) | -179.56(16) |
| C(3)-C(4)-C(5)-C(6) | 1.0(3)      |
| C(7)-C(4)-C(5)-C(6) | -179.14(16) |
| C(4)-C(5)-C(6)-C(1) | -1.5(3)     |
| C(4)-C(5)-C(6)-C(8) | -177.10(16) |
| O(1)-C(1)-C(6)-C(5) | -177.79(15) |
| C(2)-C(1)-C(6)-C(5) | 0.8(2)      |

---

|                         |             |
|-------------------------|-------------|
| O(1)-C(1)-C(6)-C(8)     | -2.3(2)     |
| C(2)-C(1)-C(6)-C(8)     | 176.28(15)  |
| C(5)-C(6)-C(8)-C(13)    | 51.7(2)     |
| C(1)-C(6)-C(8)-C(13)    | -123.74(18) |
| C(5)-C(6)-C(8)-C(9)     | -130.06(19) |
| C(1)-C(6)-C(8)-C(9)     | 54.5(2)     |
| C(13)-C(8)-C(9)-C(10)   | -0.3(2)     |
| C(6)-C(8)-C(9)-C(10)    | -178.50(16) |
| C(13)-C(8)-C(9)-N(2)    | -177.51(15) |
| C(6)-C(8)-C(9)-N(2)     | 4.3(3)      |
| C(8)-C(9)-C(10)-C(11)   | 1.1(3)      |
| N(2)-C(9)-C(10)-C(11)   | 178.54(15)  |
| C(9)-C(10)-C(11)-C(12)  | -0.8(3)     |
| C(13)-C(12)-C(11)-C(10) | -0.3(3)     |
| C(11)-C(12)-C(13)-C(8)  | 1.2(3)      |
| C(9)-C(8)-C(13)-C(12)   | -0.9(3)     |
| C(6)-C(8)-C(13)-C(12)   | 177.53(16)  |
| O(6)-C(14)-C(15)-C(16)  | 179.54(16)  |
| C(19)-C(14)-C(15)-C(16) | 0.5(3)      |
| O(6)-C(14)-C(15)-N(3)   | -1.2(3)     |
| C(19)-C(14)-C(15)-N(3)  | 179.76(15)  |
| C(14)-C(15)-C(16)-C(17) | -1.5(3)     |
| N(3)-C(15)-C(16)-C(17)  | 179.21(16)  |
| C(15)-C(16)-C(17)-C(18) | 0.8(3)      |
| C(15)-C(16)-C(17)-C(20) | -179.68(17) |
| C(16)-C(17)-C(18)-C(19) | 0.9(3)      |
| C(20)-C(17)-C(18)-C(19) | -178.61(17) |
| C(17)-C(18)-C(19)-C(14) | -1.9(3)     |
| C(17)-C(18)-C(19)-C(21) | -177.45(16) |
| O(6)-C(14)-C(19)-C(18)  | -177.96(15) |
| C(15)-C(14)-C(19)-C(18) | 1.1(2)      |
| O(6)-C(14)-C(19)-C(21)  | -2.4(2)     |
| C(15)-C(14)-C(19)-C(21) | 176.68(15)  |
| C(18)-C(19)-C(21)-C(26) | 50.6(2)     |
| C(14)-C(19)-C(21)-C(26) | -124.87(18) |
| C(18)-C(19)-C(21)-C(22) | -132.04(19) |
| C(14)-C(19)-C(21)-C(22) | 52.5(2)     |
| C(26)-C(21)-C(22)-C(23) | 2.1(3)      |
| C(19)-C(21)-C(22)-C(23) | -175.28(17) |
| C(26)-C(21)-C(22)-N(4)  | -175.95(15) |
| C(19)-C(21)-C(22)-N(4)  | 6.7(3)      |
| C(21)-C(22)-C(23)-C(24) | -1.0(3)     |
| N(4)-C(22)-C(23)-C(24)  | 177.15(16)  |
| C(22)-C(23)-C(24)-C(25) | -1.0(3)     |
| C(23)-C(24)-C(25)-C(26) | 1.7(3)      |
| C(24)-C(25)-C(26)-C(21) | -0.6(3)     |
| C(22)-C(21)-C(26)-C(25) | -1.3(3)     |
| C(19)-C(21)-C(26)-C(25) | 176.29(16)  |
| C(3)-C(2)-N(1)-O(3)     | -1.4(2)     |
| C(1)-C(2)-N(1)-O(3)     | 178.36(16)  |
| C(3)-C(2)-N(1)-O(2)     | 178.17(16)  |
| C(1)-C(2)-N(1)-O(2)     | -2.0(2)     |
| C(10)-C(9)-N(2)-O(5)    | 23.9(2)     |
| C(8)-C(9)-N(2)-O(5)     | -158.62(16) |
| C(10)-C(9)-N(2)-O(4)    | -154.34(15) |
| C(8)-C(9)-N(2)-O(4)     | 23.1(2)     |
| C(16)-C(15)-N(3)-O(7)   | 2.5(2)      |
| C(14)-C(15)-N(3)-O(7)   | -176.81(16) |
| C(16)-C(15)-N(3)-O(8)   | -177.87(16) |
| C(14)-C(15)-N(3)-O(8)   | 2.9(2)      |
| C(23)-C(22)-N(4)-O(10)  | 25.3(2)     |
| C(21)-C(22)-N(4)-O(10)  | -156.58(17) |

---



---

|                       |             |
|-----------------------|-------------|
| C(23)-C(22)-N(4)-O(9) | -152.82(16) |
| C(21)-C(22)-N(4)-O(9) | 25.3(2)     |

---

Symmetry transformations used to generate equivalent atoms:

Table 7. Hydrogen bonds for s3898ma [Å and deg.].

---

| D-H...A            | d(D-H) | d(H...A) | d(D...A)   | <(DHA) |
|--------------------|--------|----------|------------|--------|
| O(1)-H(1)...O(2)   | 0.84   | 1.88     | 2.5880(18) | 141.6  |
| O(1)-H(1)...O(9)#1 | 0.84   | 2.36     | 2.9419(17) | 127.2  |
| O(1)-H(1)...N(1)   | 0.84   | 2.49     | 2.921(2)   | 112.7  |
| O(6)-H(6)...O(8)   | 0.84   | 1.88     | 2.5853(18) | 141.3  |
| O(6)-H(6)...O(4)#2 | 0.84   | 2.25     | 2.8655(17) | 130.4  |
| O(6)-H(6)...N(3)   | 0.84   | 2.49     | 2.917(2)   | 112.6  |

---

Symmetry transformations used to generate equivalent atoms:

#1 x+1,y,z      #2 x-1,y,z

---

---

## Crystal data and structure refinement for s3767na.

|                                   |                                                                                                                          |
|-----------------------------------|--------------------------------------------------------------------------------------------------------------------------|
| Identification code               | s3767na                                                                                                                  |
| Empirical formula                 | C8 H6 F3 N O5 S                                                                                                          |
| Formula weight                    | 285.20                                                                                                                   |
| Temperature                       | 100(2) K                                                                                                                 |
| Wavelength                        | 1.5418 Å                                                                                                                 |
| Crystal system, space group       | Monoclinic, P 1 21/n 1                                                                                                   |
| Unit cell dimensions              | a = 5.3555(6) Å    alpha = 90 deg.<br>b = 12.8070(14) Å    beta = 96.773(8) deg.<br>c = 16.0563(15) Å    gamma = 90 deg. |
| Volume                            | 1093.6(2) Å <sup>3</sup>                                                                                                 |
| Z, Calculated density             | 4, 1.732 Mg/m <sup>3</sup>                                                                                               |
| Absorption coefficient            | 3.248 mm <sup>-1</sup>                                                                                                   |
| F(000)                            | 576                                                                                                                      |
| Crystal size                      | 0.18 x 0.08 x 0.02 mm                                                                                                    |
| Theta range for data collection   | 2.7728 to 73.9454 deg.                                                                                                   |
| Limiting indices                  | -6<=h<=5, -15<=k<=9, -19<=l<=15                                                                                          |
| Reflections collected / unique    | 4685 / 2078 [R(int) = 0.0724]                                                                                            |
| Completeness to theta = 66.60     | 96.8 %                                                                                                                   |
| Absorption correction             | Semi-empirical from equivalents                                                                                          |
| Max. and min. transmission        | 1.00000 and 0.63119                                                                                                      |
| Refinement method                 | Full-matrix least-squares on F <sup>2</sup>                                                                              |
| Data / restraints / parameters    | 2078 / 0 / 165                                                                                                           |
| Goodness-of-fit on F <sup>2</sup> | 1.036                                                                                                                    |
| Final R indices [I>2sigma(I)]     | R1 = 0.0703, wR2 = 0.1827                                                                                                |
| R indices (all data)              | R1 = 0.0968, wR2 = 0.2202                                                                                                |
| Largest diff. peak and hole       | 0.473 and -0.475 e.Å <sup>-3</sup>                                                                                       |

Table 2. Atomic coordinates ( x 10<sup>4</sup>) and equivalent isotropic displacement parameters (Å<sup>2</sup> x 10<sup>3</sup>) for s3767na.  
U(eq) is defined as one third of the trace of the orthogonalized Uij tensor.

---

x

y

z

U(eq)

---

---

|      |           |          |         |        |
|------|-----------|----------|---------|--------|
| C(1) | 1562(7)   | 9565(3)  | 2932(2) | 39(1)  |
| C(2) | 460(8)    | 10486(3) | 3187(2) | 40(1)  |
| C(3) | -1218(8)  | 10349(3) | 3793(3) | 44(1)  |
| C(4) | -1693(9)  | 9385(3)  | 4114(2) | 48(1)  |
| C(5) | -587(9)   | 8493(3)  | 3857(3) | 53(1)  |
| C(6) | 1067(9)   | 8601(3)  | 3254(3) | 49(1)  |
| C(7) | 1699(10)  | 9698(4)  | 1159(3) | 56(1)  |
| C(8) | -1135(12) | 7429(4)  | 4203(3) | 75(2)  |
| F(1) | 232(8)    | 8901(4)  | 1057(2) | 118(2) |
| F(2) | 3169(7)   | 9704(3)  | 570(2)  | 78(1)  |
| F(3) | 403(7)    | 10560(3) | 1111(2) | 95(1)  |
| N(1) | -2600(8)  | 11241(3) | 4065(2) | 56(1)  |
| O(1) | 4926(7)   | 8618(2)  | 2171(2) | 59(1)  |
| O(2) | 5177(5)   | 10544(2) | 2245(2) | 48(1)  |
| O(3) | 952(6)    | 11392(2) | 2840(2) | 49(1)  |
| O(4) | -4253(7)  | 11092(3) | 4510(2) | 72(1)  |
| O(5) | -2062(8)  | 12116(3) | 3830(3) | 77(1)  |
| S(1) | 3709(2)   | 9610(1)  | 2179(1) | 42(1)  |

---

Table 3. Bond lengths [Å] and angles [deg] for s3767na.

---

|                |          |
|----------------|----------|
| C(1)-C(6)      | 1.376(6) |
| C(1)-C(2)      | 1.401(5) |
| C(1)-S(1)      | 1.766(4) |
| C(2)-O(3)      | 1.327(4) |
| C(2)-C(3)      | 1.411(5) |
| C(3)-C(4)      | 1.373(6) |
| C(3)-N(1)      | 1.456(5) |
| C(4)-C(5)      | 1.372(6) |
| C(4)-H(4)      | 0.9500   |
| C(5)-C(6)      | 1.394(5) |
| C(5)-C(8)      | 1.513(6) |
| C(6)-H(6)      | 0.9500   |
| C(7)-F(1)      | 1.287(6) |
| C(7)-F(2)      | 1.301(5) |
| C(7)-F(3)      | 1.301(6) |
| C(7)-S(1)      | 1.853(5) |
| C(8)-H(8A)     | 0.9800   |
| C(8)-H(8B)     | 0.9800   |
| C(8)-H(8C)     | 0.9800   |
| N(1)-O(4)      | 1.217(4) |
| N(1)-O(5)      | 1.227(5) |
| O(1)-S(1)      | 1.429(3) |
| O(2)-S(1)      | 1.428(3) |
| O(3)-H(3)      | 0.8400   |
| C(6)-C(1)-C(2) | 122.6(3) |
| C(6)-C(1)-S(1) | 117.2(3) |
| C(2)-C(1)-S(1) | 120.2(3) |
| O(3)-C(2)-C(1) | 120.1(3) |
| O(3)-C(2)-C(3) | 125.0(3) |
| C(1)-C(2)-C(3) | 114.9(3) |
| C(4)-C(3)-C(2) | 122.1(4) |
| C(4)-C(3)-N(1) | 118.0(4) |
| C(2)-C(3)-N(1) | 119.8(4) |
| C(5)-C(4)-C(3) | 122.0(4) |
| C(5)-C(4)-H(4) | 119.0    |
| C(3)-C(4)-H(4) | 119.0    |
| C(4)-C(5)-C(6) | 117.3(4) |

---

---

|                  |            |
|------------------|------------|
| C(4)-C(5)-C(8)   | 122.0(4)   |
| C(6)-C(5)-C(8)   | 120.7(4)   |
| C(1)-C(6)-C(5)   | 121.1(4)   |
| C(1)-C(6)-H(6)   | 119.5      |
| C(5)-C(6)-H(6)   | 119.5      |
| F(1)-C(7)-F(2)   | 109.0(4)   |
| F(1)-C(7)-F(3)   | 110.6(5)   |
| F(2)-C(7)-F(3)   | 108.4(4)   |
| F(1)-C(7)-S(1)   | 110.3(4)   |
| F(2)-C(7)-S(1)   | 107.7(4)   |
| F(3)-C(7)-S(1)   | 110.8(3)   |
| C(5)-C(8)-H(8A)  | 109.5      |
| C(5)-C(8)-H(8B)  | 109.5      |
| H(8A)-C(8)-H(8B) | 109.5      |
| C(5)-C(8)-H(8C)  | 109.5      |
| H(8A)-C(8)-H(8C) | 109.5      |
| H(8B)-C(8)-H(8C) | 109.5      |
| O(4)-N(1)-O(5)   | 122.4(4)   |
| O(4)-N(1)-C(3)   | 119.0(4)   |
| O(5)-N(1)-C(3)   | 118.6(3)   |
| C(2)-O(3)-H(3)   | 109.5      |
| O(2)-S(1)-O(1)   | 119.9(2)   |
| O(2)-S(1)-C(1)   | 111.94(17) |
| O(1)-S(1)-C(1)   | 108.18(18) |
| O(2)-S(1)-C(7)   | 105.8(2)   |
| O(1)-S(1)-C(7)   | 105.3(2)   |
| C(1)-S(1)-C(7)   | 104.4(2)   |

---

Symmetry transformations used to generate equivalent atoms:

Table 4. Anisotropic displacement parameters ( $\text{\AA}^2 \times 10^3$ ) for s3767na. The anisotropic displacement factor exponent takes the form:  
 $-2 \pi^2 [ h^2 a^{*2} U_{11} + \dots + 2 h k a^* b^* U_{12} ]$

---

|      | U11    | U22    | U33    | U23    | U13    | U12    |
|------|--------|--------|--------|--------|--------|--------|
| C(1) | 49(2)  | 30(2)  | 41(2)  | 0(1)   | 12(2)  | -2(2)  |
| C(2) | 50(2)  | 33(2)  | 39(2)  | 1(1)   | 9(2)   | -2(2)  |
| C(3) | 53(2)  | 36(2)  | 46(2)  | -3(2)  | 13(2)  | -1(2)  |
| C(4) | 68(3)  | 35(2)  | 42(2)  | -1(2)  | 17(2)  | -5(2)  |
| C(5) | 81(3)  | 31(2)  | 50(2)  | 4(2)   | 22(2)  | -8(2)  |
| C(6) | 65(3)  | 35(2)  | 49(2)  | -3(2)  | 16(2)  | 1(2)   |
| C(7) | 72(3)  | 52(3)  | 45(2)  | -5(2)  | 12(2)  | -13(2) |
| C(8) | 125(5) | 32(3)  | 77(3)  | 4(2)   | 48(3)  | -10(3) |
| F(1) | 145(4) | 130(4) | 75(2)  | 1(2)   | -5(2)  | -89(3) |
| F(2) | 98(2)  | 88(3)  | 53(2)  | -4(1)  | 29(2)  | -4(2)  |
| F(3) | 105(3) | 112(3) | 63(2)  | -11(2) | -12(2) | 49(2)  |
| N(1) | 71(3)  | 40(2)  | 61(2)  | 1(2)   | 29(2)  | 6(2)   |
| O(1) | 72(2)  | 31(2)  | 81(2)  | 4(1)   | 36(2)  | 8(1)   |
| O(2) | 50(2)  | 36(2)  | 60(2)  | 5(1)   | 13(1)  | -5(1)  |
| O(3) | 68(2)  | 24(2)  | 59(2)  | 3(1)   | 26(1)  | 2(1)   |
| O(4) | 88(2)  | 55(2)  | 81(2)  | 8(2)   | 50(2)  | 9(2)   |
| O(5) | 110(3) | 32(2)  | 102(3) | 2(2)   | 62(2)  | 6(2)   |
| S(1) | 50(1)  | 30(1)  | 49(1)  | 2(1)   | 15(1)  | 0(1)   |

---

Table 5. Hydrogen coordinates ( $\times 10^4$ ) and isotropic

---

---

displacement parameters ( $\text{\AA}^2 \times 10^3$ ) for s3767na.

---

|       | x     | y     | z    | U(eq) |
|-------|-------|-------|------|-------|
| H(4)  | -2823 | 9334  | 4526 | 57    |
| H(6)  | 1865  | 8000  | 3062 | 59    |
| H(8A) | 339   | 7183  | 4570 | 112   |
| H(8B) | -1521 | 6937  | 3739 | 112   |
| H(8C) | -2577 | 7479  | 4524 | 112   |
| H(3)  | 75    | 11864 | 3024 | 74    |

---

Table 6. Torsion angles [deg] for s3767na.

---

|                     |           |
|---------------------|-----------|
| C(6)-C(1)-C(2)-O(3) | -178.2(4) |
| S(1)-C(1)-C(2)-O(3) | 2.5(6)    |
| C(6)-C(1)-C(2)-C(3) | -0.6(6)   |
| S(1)-C(1)-C(2)-C(3) | -179.9(3) |
| O(3)-C(2)-C(3)-C(4) | 178.4(4)  |
| C(1)-C(2)-C(3)-C(4) | 0.9(6)    |
| O(3)-C(2)-C(3)-N(1) | 1.5(7)    |
| C(1)-C(2)-C(3)-N(1) | -176.0(4) |
| C(2)-C(3)-C(4)-C(5) | -0.8(7)   |
| N(1)-C(3)-C(4)-C(5) | 176.2(4)  |
| C(3)-C(4)-C(5)-C(6) | 0.3(7)    |
| C(3)-C(4)-C(5)-C(8) | -179.3(5) |
| C(2)-C(1)-C(6)-C(5) | 0.2(7)    |
| S(1)-C(1)-C(6)-C(5) | 179.4(4)  |
| C(4)-C(5)-C(6)-C(1) | 0.0(7)    |
| C(8)-C(5)-C(6)-C(1) | 179.6(5)  |
| C(4)-C(3)-N(1)-O(4) | -5.7(7)   |
| C(2)-C(3)-N(1)-O(4) | 171.4(4)  |
| C(4)-C(3)-N(1)-O(5) | 174.8(5)  |
| C(2)-C(3)-N(1)-O(5) | -8.2(7)   |
| C(6)-C(1)-S(1)-O(2) | -145.7(3) |
| C(2)-C(1)-S(1)-O(2) | 33.6(4)   |
| C(6)-C(1)-S(1)-O(1) | -11.5(4)  |
| C(2)-C(1)-S(1)-O(1) | 167.8(3)  |
| C(6)-C(1)-S(1)-C(7) | 100.3(4)  |
| C(2)-C(1)-S(1)-C(7) | -80.4(4)  |
| F(1)-C(7)-S(1)-O(2) | -177.7(4) |
| F(2)-C(7)-S(1)-O(2) | 63.5(4)   |
| F(3)-C(7)-S(1)-O(2) | -54.9(4)  |
| F(1)-C(7)-S(1)-O(1) | 54.4(4)   |
| F(2)-C(7)-S(1)-O(1) | -64.3(4)  |
| F(3)-C(7)-S(1)-O(1) | 177.2(3)  |
| F(1)-C(7)-S(1)-C(1) | -59.4(4)  |
| F(2)-C(7)-S(1)-C(1) | -178.2(3) |
| F(3)-C(7)-S(1)-C(1) | 63.4(4)   |

---

Symmetry transformations used to generate equivalent atoms:

Table 7. Hydrogen bonds for s3767na [A and deg.].

---

| D-H...A | d(D-H) | d(H...A) | d(D...A) | <(DHA) |
|---------|--------|----------|----------|--------|
|---------|--------|----------|----------|--------|

---

---

|                    |      |      |          |       |
|--------------------|------|------|----------|-------|
| O(3)-H(3)...O(5)   | 0.84 | 1.85 | 2.569(4) | 142.0 |
| O(3)-H(3)...O(1)#1 | 0.84 | 2.27 | 2.889(4) | 130.9 |
| O(3)-H(3)...N(1)   | 0.84 | 2.46 | 2.900(4) | 113.6 |

---

Symmetry transformations used to generate equivalent atoms:

#1  $-x+1/2, y+1/2, -z+1/2$

---
